# Supplementary material for: Temporal changes in the brain lipidome during neurodevelopment of Smith–Lemli–Opitz syndrome mice
Source: Royal Society of Chemistry journal article supplement (doi:10.1039/d2an00137c), 2022-01-01
Supplement: d2an00137c2.xlsx [file d2an00137c2.xlsx]

## Sheet: Raw Positive Mode
	m/z	Retention Time (min)	CCS (angstrom^2)	E12-WT1	E12-WT2	E12-WT3	E12-WT4	E12-KO1	E12-KO2	E12-KO3	E12-KO4	E14-WT1	E14-WT2	E14-WT3	E14-WT4	E14-KO1	E14-KO2	E14-KO3	E14-KO4	E16-WT1	E16-WT2	E16-WT3	E16-WT4	E16-KO1	E16-KO2	E16-KO3	E16-KO4	P0-WT1	P0-WT2	P0-WT3	P0-WT4	P0-KO1	P0-KO2	P0-KO3	P0-KO4
0	133.012	0.430333	157.015	31.4001	4.89075	2.09594	17.7694	6.34808	2.78021	1.84058	2.71916	9.45262	6.16191	4.12143	15.6001	4.49722	1.39793	5.50403	3.45571	9.29403	5.74734	13.6753	18.2014	5.03019	15.9288	2.11642	5.32233	6.67736	2.47261	1.14566	3.38351	4.15472	16.9352	3.19933	1.65824
1	167.993	0.430333	152.342	2.44887	0.470906	0.77433	0.701591	1.07773	0.0397957	1.15746	0.630791	3.03298	2.94959	19.2445	0.553103	0.651184	1.58229	0.144159	2.34613	69.5083	183.794	2.63684	1.71507	229.461	372.727	0	40.768	0.870194	1.47629	0.478317	1.74642	2.90308	4.88467	50.1566	1.72889
2	178.964	0.430333	151.673	34.9274	2.30022	2.25015	10.6312	12.5089	7.03302	10.5224	3.62993	17.6818	4.89618	3.80698	16.7673	8.86056	1.14179	4.74797	6.11526	15.7468	8.88979	17.5831	20.3861	10.2326	8.89963	2.39132	6.63778	6.17765	13.4469	5.13215	5.25766	7.18421	20.2335	3.08263	0
3	191.001	0.430333	156.36	518.051	157.004	139.171	266.144	195.344	119.191	198.764	152.606	248.529	150.5	127.329	325.454	212.416	127.925	122.684	132.131	250.838	233.253	359.233	366.661	180.522	229.617	130.968	175.067	174.56	217.867	145.799	130.955	207.776	377.031	152.756	75.2847
4	192.981	0.430333	154.489	473.336	123.099	102.114	261.278	200.763	124.889	202.854	148.669	207.862	151.487	120.212	286.088	208.99	128.02	93.7465	127.514	302.991	255.374	344.768	358.709	240.341	294.526	124.203	188.224	147.241	219.5	132.524	123.18	194.668	342.606	147.092	76.1244
5	207.033	0.430333	162.544	1496.61	516.014	461.928	898.63	728.43	509.359	656.311	556.723	684.821	491.475	463.147	1040.88	715.331	466.478	454.605	451.112	820.93	616.897	1117.21	1379.92	626.245	828.836	493.569	499.854	503.46	683.276	514.664	453.34	656.648	1102.71	419.679	305.576
6	209.014	0.430333	160.725	1051.53	332.587	255.584	594.993	375.015	295.532	376.449	318.435	509.221	356.801	274.404	592.05	395.089	308.561	269.662	312.066	468.866	429.735	749.474	698.252	368.313	485.667	290.109	324.167	393.803	390.969	273.129	298.281	373.477	789.843	308.296	205.975
7	210.993	0.430333	155.41	505.144	133.535	85.6942	278.827	163.148	100.441	174.997	112.983	235.463	165.108	112.667	229.338	192.964	120.301	111.727	122.299	202.095	170.572	360.507	248.685	127.756	182.425	105.851	122.071	176.67	165.139	110.206	126.968	162.812	359.173	128.003	85.058
8	219.174	0.430333	172.178	858.894	363.34	301.985	917.635	344.938	393.48	371.2	334.427	423.985	361.721	309.739	862.774	390.434	402.289	331.218	356.803	368.468	368.324	1065.59	975.79	428.175	826.809	410.176	397.312	422.406	414.324	395.741	409.701	432.023	1050.1	370.978	358.579
9	225.044	0.430333	163.478	2064.85	836.844	585.721	1286.82	825.549	732.969	947.129	704.703	1076.12	823.73	631.448	1202.85	939.789	749.186	664.615	747.564	951.98	890.466	1715.27	1497.57	852.502	1124.93	712.775	744.053	885.632	893.559	648.379	751.343	893.747	1534.54	721.553	541.055
10	227.035	0.430333	163.399	394.593	204.732	97.5772	224.155	148.198	118.284	149.519	111.49	186.43	144.468	111.239	194.434	149.55	124.94	103.836	125.63	185.832	174.01	285.281	217.868	156.414	205.313	100.413	115.317	162.169	159.062	104.519	129.259	125.1	286.943	133.15	84.7188
11	229.002	0.430333	158.168	144.829	43.6675	14.6777	70.0316	30.8875	17.5827	36.4104	16.6988	74.978	52.6047	21.6124	53.808	40.0975	31.8663	20.9156	32.2174	43.846	39.1695	99.1292	65.5742	26.855	55.7299	18.4636	17.837	54.3651	32.6679	19.2352	33.8981	36.2544	94.9789	37.8459	24.572
12	233.037	0.430333	163.168	340.3	138.162	103.359	223.018	123.233	114.588	142.582	113.446	145.329	146.924	121.749	225.884	152.6	130.95	116.014	127.757	137.308	155.592	323.132	214.091	148.985	351.512	132.897	124.882	143.028	118.695	107.232	143.037	112.536	221.542	132.264	121.668
13	248.988	0.430333	165.988	95.5068	29.1793	30.3723	53.167	40.954	27.5761	50.8183	31.2258	60.1008	33.8019	25.7559	61.3452	53.7847	24.7363	19.9698	32.2043	68.4193	42.7148	65.9494	78.5266	39.1291	46.0064	33.2856	31.6212	43.9661	47.1846	38.8442	22.7143	42.1426	74.7894	26.5153	14.1516
14	251.047	0.430333	169.27	10954.5	13301.5	11854.6	13674.4	12897.5	13293.5	13624.1	12308.1	13421.6	13640.9	12783.1	12585.1	13137.4	13490.4	12611.7	12993.5	12529	13095.8	13881.2	12937.3	13131.8	13669.6	13289.3	12979.3	13415.6	13200.3	12105.1	13253.6	12704.7	13703.7	13474.8	12810
15	263.163	0.430333	175.481	284.913	293.299	277.866	281.608	278.043	291.511	296.549	275.552	282.359	295.441	315.053	282.9	262.871	333.794	307.049	290.896	423.632	602.283	318.318	275.951	616.102	988.09	325.428	377.952	306.083	267.704	265.778	273.312	397.793	355.052	466.745	524.562
16	265.019	0.430333	167.154	747.679	152.203	138.986	360.917	273.906	137.874	214.436	165.733	344.106	181.604	134.557	378.493	222.653	117.896	115.962	135.822	351.549	224.287	467.049	433.988	198.796	241.991	129.954	177.384	203.954	287.193	147.782	110.998	223.054	469.409	127.668	73.364
17	267	0.430333	167.095	3577.04	1149.59	1072.57	2067.51	1528.89	1086.44	1484.8	1233.8	1930.19	1224.94	1041.7	2287.96	1636.15	1050.53	1013.48	1072.81	2117.83	1549.73	2561.32	2591.54	1389.18	1544.11	1031.86	1214.53	1300.5	1713.06	1136.74	938.348	1573.43	2743.89	1089.07	674.107
18	268.98	0.430333	165.363	5475.84	1580.67	1191.69	2978.65	1741.13	1300.1	2065.94	1369.86	2877.71	1675.56	1333.87	3001.17	2102.9	1347.13	1211.76	1461.68	2519.43	2449.08	3973.43	3003.52	1810.53	2332.29	1287.07	1631.71	1920.05	1974.57	1276.98	1227.14	2040.19	4043.4	1633.21	923.408
19	281.052	0.430333	171.665	8333.4	2400.7	2146.62	4828.22	3841.1	2442.34	3159.82	2752.56	3779.25	2668.52	2085.6	5003.33	3634.41	2247.3	2015.75	2251.14	4975.01	3238.45	5856.03	6684.52	3453.02	4090.55	2307.44	2651.86	2718.39	3772.58	2594.46	2122.39	3592.61	6018.95	2070.9	1304.26
20	285.01	0.430333	168.255	3668.39	991.363	785.726	2077.95	1283.35	917.813	1301.46	1002.4	1738.08	1209.2	846.335	1945.18	1358.1	950.589	853.449	989.44	1671.72	1354.01	2588.37	2205.09	1128	1462.81	857.084	980.49	1235.37	1431.72	856.915	873.889	1320.42	2722.88	1031.63	584.491
21	285.233	0.430333	193.956	887.161	757.982	720.938	800.442	830.09	875.622	844.184	723.386	900.688	871.393	869.259	855.117	851.002	862.599	933.075	949.829	1186.07	1704.78	1014.96	706.244	1910.22	2249.14	922.213	1142.87	907.724	784.297	775.583	887.924	1206.79	1261.79	1319.82	1592.38
22	290.014	0.430333	176.324	198.224	63.5028	37.1963	102.136	57.3936	64.3028	75.5361	47.5139	112.068	61.9125	56.5949	97.1533	80.5662	38.8367	43.3434	42.0379	94.9937	78.4936	141.421	125.052	49.8128	64.2582	49.9183	61.4325	82.534	79.6574	49.9789	62.1984	76.8002	145.276	57.6692	25.1805
23	291.994	0.430333	174.646	862.411	193.219	169.209	380.734	238.589	192.029	307.828	190.282	435.136	211.29	177.442	443.805	265.405	181.199	146.845	183.845	413.732	428.41	569.301	451.758	278.799	379.227	145.067	251.466	233.585	314.909	192.433	167.148	274.934	586.018	236.402	93.6572
24	299.062	0.430333	171.196	1317.37	520.337	414.017	806.146	607.539	510.32	591.727	486.874	675.75	555.52	464.125	716.016	606.506	455.175	446.484	490.149	634.521	611.216	980.143	861	534.541	657.702	438.923	534.143	576.578	590.88	453.465	491.344	596.677	937.4	514.474	368.158
25	303.163	0.430333	184.01	5565.18	5522.24	4942.89	5622.18	6717.48	7022.98	6765.16	6103.14	5626.24	5553.62	5396.05	5347.56	8339.39	7621.95	8795.68	8093.03	5500.52	6203.47	5749.47	5139.43	8175.38	8685.21	8674.42	8494.76	5920.39	5357.45	5047.82	5855.37	13262.3	8968.61	11830.7	17659
26	308.026	0.430333	177.486	212.265	49.1997	40.959	138.997	88.8239	44.9312	81.1189	37.2987	107.209	44.6714	49.967	148.324	71.0009	28.9153	28.955	38.1576	105.017	65.169	152.706	177.138	47.3373	63.613	26.283	40.5754	55.1046	86.5148	43.3532	45.5173	47.9896	161.416	20.926	11.1282
27	313.274	0.430333	200.879	2594.58	1914.18	1768.63	1984.94	1736.15	1752.35	1755.8	1543.63	3127.77	2897.77	2713.83	3774.67	1925.98	1959.89	2077.19	1898.25	2597.09	2907.27	4077.54	2469.27	2713.98	3357.13	1870.16	2592.14	3141.42	2197.78	2001.18	2213.67	1724.17	3609.26	2118.67	1971.38
28	324.986	0.430333	173.868	2259.7	590.478	511.822	1098.88	725.106	486.39	880.907	591.85	1207.7	701.783	488.291	1254.25	907.626	522.415	465.595	494.612	1170.95	955.257	1655.82	1378.54	732.729	887.121	491.162	687.904	764.854	949.938	585.23	484.291	884.486	1625.05	595.854	331.729
29	326.967	0.430333	173.826	4403.34	1331.16	1224.47	2340.39	1913.76	1243.4	2029.64	1452.99	2442.84	1385.96	1124.08	2918.11	2078.96	1157.67	1088.18	1180.74	2677.53	1954.96	3230.53	3434.74	1603.12	1795.81	1208.87	1588.11	1548.65	2149.76	1463.26	1025.53	2043.18	3154.75	1173.79	685.928
30	327.079	0.430333	181.853	49712.3	56097.6	56250.4	58930.1	57032.4	55476.7	55787.2	56571	56266.6	56580.8	56889.4	59943.3	53218.9	56585.3	55656.2	56274.5	57460.6	53239.2	61639.8	58553.1	56724.6	60302.7	56290.6	55398.7	55754.5	55610.9	56115.9	56015.8	55282.2	58866.5	56765.8	54710.3
31	334.25	0.430333	194.227	538.689	519.782	462.102	568.93	522.477	505.157	518.036	496.527	546.04	508.955	535.046	475.445	561.229	569.862	546.436	573.789	823.768	1343.5	577.339	492.019	1440.19	2304.62	633.65	814.204	515.208	516.665	468.248	562.905	660.999	668.077	796.696	923.641
32	336.264	0.430333	197.259	849.806	702.151	622.536	720.083	717.626	714.04	718.331	677.661	689.152	682.808	852.929	710.614	791.155	829.699	794.722	794.308	1517.02	2657.76	837.28	642.251	3012.46	4565.7	810.618	1378	674.495	624.423	592.56	710.778	1140.32	1001.6	1372.88	1811.57
33	339.038	0.430333	178.411	171.726	19.5962	24.0806	92.8216	45.6084	25.8743	48.809	22.1132	58.5185	36.3994	25.2592	79.3482	42.0934	23.5176	27.6245	30.442	66.9469	31.3223	93.7285	115.795	34.1622	49.9253	19.6204	29.8261	49.6828	37.2685	33.8507	25.1127	43.3744	102.537	24.6855	10.8232
34	339.286	0.430333	203.281	839.788	465.782	464.38	627.669	476.004	439.537	517.825	389.648	818.89	815.533	641.068	1051.4	540.12	559.466	656.121	564.458	1118.78	1783.44	1147.75	672.523	1989.91	2850.67	626.578	1050.6	716.191	537.044	619.153	698.931	739.504	1257.05	940.462	1091.21
35	341.018	0.430333	179.969	3246.06	767.926	748.101	1914.16	1409.35	871.354	996.798	954.272	1366.19	911.681	728.089	1840.68	1215.24	678.425	768.204	756.551	1792.77	1078.63	2013.16	2624.92	1220.3	1520.67	785.061	894.855	1004.74	1303.24	913.294	677.548	1238.62	2442.23	701.767	412.789
36	341.304	0.430333	207.751	2149.4	1165.87	1041.02	1371.4	1161.32	1040.77	1280.88	975.236	1891.23	1692.4	1640.56	2073.29	1074.38	1219.32	1214.29	1116.99	1710.78	2283.64	2583.32	1604.76	2344.88	2904.89	1095.9	1752.52	1981.06	1904.96	1716.97	1730.03	908.931	2195.59	1755.35	1169.06
37	344.976	0.430333	175.083	4431.84	1212.5	998.095	2410.87	1438.62	1038.37	1881.94	1182.32	2586.05	1478.41	1007.3	2436.49	1799.66	1074.77	946.889	1094.89	2077.91	1765.69	3376.41	2561.82	1299.24	1538.49	997.829	1302.56	1692.37	1864.11	1092.71	1038.18	1705.28	3425.26	1268.57	614.344
38	355.07	0.430333	182.869	9190.59	2688.54	2202.54	5637.77	3607.7	2468.87	2739.93	2384.55	3296.86	2300.45	2112.08	5365.65	3374.8	1995.35	2114.19	2383.71	3728.73	2805.97	6172.99	6806.02	2730.15	4152.17	2174.47	2380.54	2817.73	2965.69	2342.98	1947.83	3239.62	6546.43	2012.92	1431.21
39	359.027	0.430333	179.626	1190.94	375.86	265.722	685.179	454.032	363.652	424.602	348.91	508.426	437.089	305.019	583.311	436.63	338.95	355.491	362.491	516.796	385.667	723.062	691.88	388.536	501.484	370.795	345.439	377.378	406.879	265.692	303.509	358.955	723.948	349.971	152.058
40	371.101	0.430333	187.285	1244.77	379.412	263.345	961.957	423.753	346.78	259.119	206.21	286.888	292.749	251.152	767.598	282.217	256.706	210.656	319.144	305.539	187.123	746.192	1036.36	160.297	374.05	219.881	208.165	277.567	260.439	229.156	264.513	215.202	921.025	198.061	75.0345
41	390.311	0.430333	209.732	582.977	444.203	404.815	547.605	454.846	396.426	428.189	474.804	468.212	458.007	530.927	490.023	361.832	453.565	368.558	428.451	752.069	1122.87	543.559	439.985	1057.2	2061.58	392.231	568.506	475.276	422.391	394.031	462.341	340.18	499.187	514.901	368.563
42	394.334	0.430333	212.614	661.196	587.439	588.617	1132.39	549.023	541.294	586.592	503.527	606.129	643.104	688.109	576.458	575.616	607.043	581.197	602.319	1276.42	2201.06	647.504	578.953	2136.11	3429	640.277	1017.95	651.364	579.893	543.386	678.085	770.454	798.434	1066.52	1029.62
43	400.984	0.430333	186.794	417.124	55.7483	70.8768	188.231	140.99	60.8612	108.582	86.7888	153.498	86.2026	70.0582	208.011	133.55	47.8976	51.1741	73.9715	234.46	124.254	209.964	252.025	129.409	158.153	51.8268	100.672	95.9944	147.464	82.9806	45.0393	128.708	283.428	60.2421	21.057
44	402.321	0.430333	209.522	421.902	374.611	369.81	375.028	405.716	392.513	378.023	358.676	473.825	441.446	413.694	391.454	494.536	502.718	520.87	488.704	649.582	853.918	475.758	345.609	864.561	1653.96	516.089	621.505	588.029	454.573	454.551	523.599	809.065	626.616	829.188	1212.47
45	402.965	0.430333	188.317	536.7	96.6513	101.624	270.858	159.403	108.446	162.706	115.381	213.677	115.166	87.8418	217.113	171.367	85.5738	82.2819	91.4362	272.958	206.271	265.509	303.236	166.626	208.454	96.8667	144.398	114.344	198.959	106.163	78.64	135.997	316.572	84.5094	29.6981
46	410.374	0.430333	218.185	805.334	680.286	588.813	671.266	623.923	638.208	623.535	636.065	772.349	756.541	770.799	666.858	583.637	747.74	606.095	662.823	1403.5	2214.66	823.182	604.979	2354.06	3680.8	655.651	1083.7	879.004	723.267	695.97	804.419	613.766	846.946	995.687	569.243
47	415.036	0.430333	188.139	2061.07	530.671	450.924	1170.17	990.365	550.811	658.627	642.95	804.561	554.72	466.536	1108.79	798.821	447.068	471.188	540.925	1180.17	611.985	1246.32	1676.7	804.703	867.806	486.391	550.562	664.702	862.18	655.457	434.667	798.867	1419.7	378.974	233.506
48	419	0.430333	188.083	94.2072	22.9934	10.7825	41.2671	32.0837	17.6293	31.6088	17.1661	46.829	11.8432	20.7427	35.9345	37.4125	8.47442	18.6243	16.8092	42.5707	24.5658	57.6098	49.585	29.55	29.8757	21.2785	17.8178	27.3376	33.8904	20.572	13.4094	21.0561	65.6337	6.60246	1.52322
49	422.341	0.430333	213.612	9571.11	9640.3	8525.67	10122.9	8571.41	8855.54	9374.94	8488.39	10175.6	10106.1	9318.69	8959.21	8968.67	9742.09	8797.99	9748.69	9174.88	10773.1	10165.3	8601.07	9967.85	11929.8	9154.63	9200.15	9977.87	8959.17	8536.97	9835.49	9020.3	10148.7	10441.9	9527.44
50	425.376	0.430333	216.485	382.749	303.407	275.646	297.951	241.433	254.024	299.355	279.631	361.249	350.947	387.569	325.96	282.086	288.536	279.492	288.227	651.082	1067.03	352.468	301.008	1051.54	1689.72	313.153	479.036	404.245	350.599	302.68	359.954	225.179	394.963	419.765	250.029
51	427.958	0.430333	195.627	165.253	0.791748	2.2136	49.2552	31.2304	7.23573	17.7332	8.31097	37.0336	4.66833	8.14864	49.7195	21.7577	1.5654	7.36766	10.7285	34.5541	31.4522	46.3023	50.7274	24.6835	46.9562	1.48612	13.7926	11.2335	26.4056	8.21572	2.5564	12.641	66.3208	0	0
52	429.088	0.430333	195.611	3905.36	945.915	768.302	2512.11	1550.71	986.789	1025.67	918.72	1261.32	849.477	859.211	2196.56	1239.7	754.735	811.013	957.691	1510.4	869.268	2521.54	2947.98	997.658	1440.68	812.698	776.355	1069.44	1095.64	753.435	681.054	1097.11	2889.42	705.508	490.527
53	445.12	0.430333	198.423	2004.5	690.031	492.706	1361.46	830.453	653.671	611.45	621.141	669.482	599.892	525.032	1214.63	714.08	484.546	512.103	598.907	762.366	482.185	1330.32	1761.46	564.789	741.821	541.499	437.179	627.672	617.803	557.604	503.15	578.731	1354.99	505.266	298.773
54	445.363	0.430333	223.402	500.952	328.801	259.828	372.873	310.888	299.347	277.791	280.466	393.038	401.815	385.115	605.71	427.317	399.981	400.949	328.135	527.214	759.234	645.615	316.097	831.967	1723.16	353	450.331	391.79	321.236	307.758	397.397	390.711	758.855	483.03	428.572
55	450.418	0.430333	233.263	962.475	647.21	602.882	1517.35	573.641	604.456	776.042	854.43	519.226	510.497	612.68	478.399	468.584	548.252	450.175	508.156	1374.17	2405.52	519.109	533.475	2364.01	4283.19	474.018	954.715	491.932	378.296	424.584	473.197	409.173	600.952	777.497	394.108
56	460.95	0.430333	192.152	76.5031	0	6.51458	29.006	13.0405	4.4192	12.7159	14.3112	22.7754	6.13896	8.30233	22.5905	14.1938	2.57645	5.54164	11.4923	34.7271	26.708	30.6271	44.5702	18.1191	33.9357	8.23082	11.9031	15.6051	11.8722	13.2436	8.52414	17.127	46.0009	10.4404	1.11069
57	464.418	0.430333	228.826	530.765	440.429	362.779	469.8	449.512	423.012	442.622	510.996	458.471	450.007	491.256	375.174	418.717	524.764	447.355	469.296	799.395	1307.04	461.824	396.686	1274.31	2211.77	488.034	678.207	441.417	378.686	382.192	485.208	722.996	588.798	679.308	1301.92
58	466.432	0.430333	228.797	436.43	378.431	352.744	399.32	345.447	359.933	370.569	366.479	443.718	416.631	433.158	357.439	335.568	386.331	288.444	353.286	857.912	1513.67	440.409	369.41	1421	2661.39	327.208	603.267	380.888	379.333	353.096	369.887	271.845	449.494	507.014	287.311
59	467.104	0.430333	202.644	16.6571	11.547	10.505	13.656	35.0219	2.68261	11.6879	1.78946	10.6663	5.06134	17.1032	28.7782	34.4813	7.02635	10.3553	6.567	23.1449	7.87057	20.1731	77.0035	25.937	20.7537	5.75312	6.22904	13.2178	8.56181	15.0661	3.65256	18.4267	6.03756	7.28864	0
60	470.465	0.430333	232.972	42.3466	27.235	23.1488	18.9231	16.4711	24.0648	31.6817	19.3053	23.4051	24.0248	31.6057	19.3274	20.7547	37.0797	13.4546	17.2266	114.911	305.614	42.2954	22.9983	270.912	611.636	17.0364	64.829	21.3118	28.5644	16.5407	26.1957	20.5071	29.7526	53.9674	14.5877
61	476.001	0.430333	196.533	49.6566	7.90671	3.45016	26.2131	16.6523	2.85144	3.20645	4.10556	12.1604	4.80146	2.5907	15.8281	13.3172	8.28721	4.05528	7.82281	15.4425	6.10208	18.9467	36.1255	7.3803	18.3125	5.61658	6.00264	13.9536	2.77438	2.58987	6.43143	4.31944	21.3826	0	0
62	476.41	0.430333	228.662	1089.38	940.193	792.002	1037.66	759.531	792.891	997.37	788.656	1040.67	1033.3	972.955	865.721	861.822	973.075	849.538	964.581	1309.52	1960.36	1119.84	918.197	1866.86	3194.78	946.258	1135.38	1023.86	894.45	785.229	1016.13	821.902	1150.39	1226.65	896.316
63	484.472	0.430333	239.754	160.867	146.753	93.6485	136.637	117.858	124.38	144.457	111.84	142.288	138.216	133.461	130.757	116.962	120.17	107.747	135.525	221.962	361.133	158.048	122.476	348.657	617.041	115.774	200.699	137.708	135.613	120.28	137.682	99.5117	141.807	168.099	122.14
64	488.417	0.430333	229.918	251.484	208.333	156.635	238.098	159.665	178.183	194.507	166.58	189.868	182.171	218.754	198.29	161.293	188.279	166.291	167.982	317.435	557.914	200.098	175.733	500.64	1144.21	173.662	254.363	177.395	175.187	163.553	201.65	153.244	231.628	211.477	103.024
65	489.055	0.430333	200.894	555.149	99.0626	55.6915	263.159	163.41	87.6715	72.0947	63.1748	90.8505	52.8715	61.2163	205.593	84.184	51.4798	62.7506	90.578	100.251	66.7914	241.925	258.047	54.9441	133.759	56.8356	46.1813	89.3807	62.986	62.5121	41.1442	68.1439	269.481	35.2647	2.61943
66	498.494	0.430333	239.57	42.5989	16.243	13.7002	20.5415	17.4403	27.8843	32.3901	12.5835	17.9264	18.2246	29.605	16.5325	15.5286	28.3691	8.82394	25.7258	93.9783	195.221	13.0918	9.36628	222.467	438.966	13.1786	51.1092	20.2407	13.2974	28.0105	18.5747	7.79507	20.347	49.4232	7.59126
67	500.414	0.430333	235.377	241.302	191.42	151.259	200.021	127.18	155.996	162.674	141.846	211.488	215.336	212.479	169.768	156.036	194.487	155.577	167.307	308.166	469.445	227.727	155.377	428.864	970.924	146.143	213.665	193.54	146.77	147.425	193.145	154.298	177.54	228.459	129.079
68	502.43	0.430333	235.351	751.648	789.286	628.188	719.484	688.16	616.249	689.768	703.796	806.389	768.504	768.743	652.845	639.787	841.335	606.641	729.543	804.494	1108.08	689.297	602.497	1019.82	1582.74	674.782	762.455	713.781	659.348	676.352	670.108	663.18	714.179	693.822	551.534
69	503.107	0.430333	206.679	2132.06	550.92	401.086	1218.56	960.972	439.369	526.997	458.051	740.364	455.848	440.339	1141.64	787.589	366.475	373.34	478.619	981.68	470.714	1308.29	1536.7	636.574	852.67	377.747	369.341	595.693	538.152	519.962	374.36	676.88	1268	325.077	211.568
70	506.457	0.430333	238.084	1107.64	1042.77	876.049	1023.52	878.203	899.378	914.632	884.026	1065.56	1100.78	1005.76	932.121	925.568	1033.25	948.814	1079.94	1296.82	1963.77	1066.83	835.388	1850.15	3014.18	922.283	1205.95	1111.81	887.809	825.197	1049.93	979.734	1154.72	1234.9	1013.37
71	519.139	0.430333	207.982	731.841	172.244	172.419	495.55	357.997	132.832	168.998	127.401	266.848	142.322	203.895	430.571	280.398	124.5	115.283	173.538	308.988	95.8114	413.429	536.492	224.918	230.796	97.5958	107.662	199.508	165.853	165.843	144.606	185.958	357.856	100.158	57.7276
72	521.451	0.430333	246.16	459.233	544.762	553.317	531.592	403.268	503.236	579.434	380.144	436.565	530.423	628.905	870.533	402.959	355.823	668.728	486.826	572.272	543.352	658.338	533.214	653.551	818.055	482.126	489.25	660.948	539.44	407.165	637.701	493.904	549.256	575.739	587.077
73	523.474	0.430333	248.861	8837.05	9928.85	8726.71	10233.3	9092.14	9293.56	9773.17	8743.37	10914.7	11120.1	9747.53	9841.53	9901.01	10280.8	9613.64	10203.2	9206.61	10181.7	11220.5	8981.27	9562.54	10762.8	9697.53	9863.01	10865.9	9678.48	9424.12	11092.4	9626.09	11413	10778.6	10202.7
74	528.447	0.430333	244.71	3923.91	3513.36	3036.57	3522.85	3608.16	3117.28	3472.11	3154.93	4425.27	3786.97	3608.08	2980.51	2994.61	4556.95	3016.84	3905.97	3428.78	4463.4	3586.39	3130.79	3726.22	4774.54	3673.94	3513.59	3886.96	3852.02	3940.75	3883.71	3241.98	4000.74	3984.22	2827.15
75	536.166	0.430333	216.543	1103.2	161.766	386.715	585.414	1136.3	94.1069	152.174	116.51	308.598	111.663	370.654	610.986	741.705	74.8773	112.61	172.233	850.906	93.7419	294.45	900.875	608.833	374.806	88.846	145.629	403.432	117.735	463.002	97.4146	544.79	206.552	110.379	50.3372
76	549.49	0.430333	252.621	1279.82	938.73	771.321	1085.09	776.628	766.812	693.138	619.397	1427.65	1520.3	1014.4	1918.94	1314.59	1019.03	1329.87	829.388	801.449	895.273	1985.97	1021.58	987.98	1662.8	940.476	1150.24	1485.13	979.907	1203.03	1907.69	1098.87	1954.56	1072.44	1508.23
77	551.506	0.430333	255.289	18095.7	20094.2	17768.3	20237.8	18436	18767.5	19057	16914.7	24073.4	24113	20220.1	21176.5	20135.3	21249.9	20801.9	20368.4	18939.5	19396.4	24304.8	17794.7	18902.1	20974.3	19874.5	20429.4	24520.4	21052	19642.3	25025.2	19970.7	25285.6	22443	22491.7
78	552.569	0.430333	260.621	237.261	107.98	119.712	153.292	141.712	102.692	113.977	91.657	308.442	330.561	169.304	239.608	134.862	198.848	156.315	146.838	256.383	278.186	574.562	214.677	280.903	452.234	139.681	172.672	502.141	410.78	306.889	469.81	228.882	672.627	237.32	221.967
79	563.074	0.430333	213.397	227.909	30.1642	17.0862	96.5019	44.4351	23.7689	12.5277	5.54388	21.628	12.9448	12.5767	73.16	35.707	10.2364	18.1449	18.9352	39.2349	17.5271	94.3891	107.861	9.48188	51.3096	16.4913	7.90224	25.3116	15.5877	13.5114	13.6841	21.3593	128.781	8.77191	3.3605
80	573.487	0.430333	252.365	253.175	192.852	169.513	206.086	146.463	147.791	151.264	151.54	264.256	261.216	259.6	275.541	250.588	237.265	248.552	177.88	267.858	345.773	291.07	165.989	334.476	549.915	209.692	282.954	401.839	282.919	313.791	459.824	249.399	374.038	315.272	299.572
81	575.505	0.430333	255.031	1208.74	561.356	592.371	880.225	536.008	466.332	588.34	471.662	1106.27	1072.51	907.385	1430.21	866.692	874.61	1014.67	616.163	592.674	608.755	1358.38	670.674	603.343	930.609	546.28	690.942	1149.47	895.333	653.427	1047.34	686.661	1143.9	701.44	974.213
82	577.123	0.430333	220.462	397.866	73.9829	68.483	236.442	139.353	99.9563	130.505	66.1292	114.397	101.051	84.7424	198.06	111.012	76.3213	71.3925	74.1278	120.588	86.9334	239.03	231.282	65.9757	138.386	76.6458	63.0774	102.874	82.061	53.875	66.7243	99.5127	249.05	76.0049	32.5624
83	577.52	0.430333	259.019	4324.58	3045.08	3044.91	3359.88	3271.38	2718.57	2904.11	2408.24	7188.77	6864.85	4685.57	6031.96	5002.4	4605.48	6122.37	3548.41	3440.98	3158.67	6532.76	3358.03	3370.84	4460.49	4015.57	4515.18	7872.44	6441.35	4833.47	7638.98	4773.1	6914.84	5035.99	6443.23
84	579.429	0.430333	244.168	1509.79	1264.63	1105.29	1395.46	1094.79	1195.82	1261.37	1093.69	1406.16	1491.41	1270.48	1343.79	1329.6	1272.73	1309.47	1269	1237.03	1390.29	1695.42	1186.39	1469.14	2097.2	1260.03	1334.24	1505.73	1222.21	1068.58	1548.48	1189.58	1627.3	1471.5	1380.25
85	579.536	0.430333	261.655	3452.76	2257.99	1899.11	2632.62	2290.28	2044.55	2017.7	1597.76	4019.95	4207.16	2564.05	3339.91	2912.72	3064.09	3277.23	2574.53	2141.94	2319.7	4312.6	2055.27	2750.61	2872.07	2600.14	3045.84	3824.01	3291.59	2480.44	4466	2358.86	5120.32	3719.18	3239.06
86	596.499	0.430333	245.37	8617.72	8390.9	7302.64	8942.6	7904.27	8012.9	8432.29	7599.99	9079.01	9284.14	8255.79	7995.49	8328.17	8792.57	8114.1	8435.49	8038.41	8707.02	9257.22	7564.59	8496.03	9367.22	8399.69	8460.24	9663.93	8420.3	7785.94	9510.86	8638.39	9604.41	9988.46	9380.03
87	601.518	0.430333	258.78	861.271	461.623	417.252	651.343	366.477	427.838	450.192	460.067	651.238	657.156	588.633	799.426	568.565	547.393	677.632	480.905	489.628	480.133	751.134	1247.56	495.415	768.48	422.584	534.675	694.535	567.217	531.614	674.837	457.015	689.332	518.839	585.776
88	603.536	0.430333	261.415	3255.28	2556.27	2355.83	2589.89	2474.74	2239.31	2445.26	2027.62	4562.68	4468.46	3421.97	3583.93	3620.47	3195.7	4567.18	2762.43	2573.53	2480.8	4095.95	2343.77	2541.29	3178.34	2869.31	3226.23	5163.36	4225.8	3218.43	4650.92	3012.95	4044.85	3570.81	4098.31
89	607.393	0.430333	257.393	3479.95	803.893	697.932	1958.82	869.346	776.016	821.681	706.104	899.936	777.199	749.13	1900.31	853.045	827.932	749.255	731.74	787.442	791.896	2375.03	2467.72	915.48	2071.97	688.082	694.443	773.12	666.845	556.475	785.967	813.071	2328.25	858.35	695.552
90	607.567	0.430333	267.962	24352.7	16909.3	10439.5	22216.9	15341.5	15594.3	16341.6	10280	21717.6	24225.5	13506	17525.2	14956.2	18007.3	14124.6	17520.3	11883.3	16177.7	27002.6	11750.4	24793.2	16549.9	14501.1	20291.1	20938.3	13406.2	11099.5	20971.4	13583.9	24496.3	30223.1	19271.6
91	610.185	0.430333	227.266	4308.67	323.517	327.579	2752.74	1553.68	193.014	148.088	168.741	566.086	180.265	265.37	1036.99	1025.52	127.684	154.627	284.409	878.195	142.406	888.635	1170.81	698.882	884.888	182.208	212.075	609.432	124.583	176.724	80.9902	706.719	702.391	107.692	66.001
92	612.535	0.430333	258.676	663.466	465.075	410.052	514.893	403.893	418.551	441.511	371.327	641.896	637.239	523.13	661.145	473.096	537.173	533.493	481.091	517.9	661.034	789.255	430.049	548.251	914.845	479.407	526.925	640.466	525.997	488.931	676.226	546.599	745.759	553.708	595.661
93	615.476	0.430333	254.647	817.613	648.304	543.722	686.32	610.091	616.899	693.531	567.487	683.511	671.127	640.035	686.2	668.641	713.744	641.708	677.954	569.341	715.935	819.198	596.393	613.796	778.315	605.532	573.736	640.893	603.259	592.874	663.092	563.395	757.397	647.129	578.372
94	619.522	0.430333	258.613	610.495	407.999	317.486	499.652	360.508	351.264	381.172	341.488	500.051	456.173	384.935	536.57	354.439	440.465	385.029	430.019	433.513	553.212	678.358	479.678	541.376	734.674	405.375	453.202	501.767	390.073	389.024	432.463	377.364	716.847	493.276	424.386
95	623.505	0.430333	259.905	780.964	618.11	544.29	653.226	518.42	529.295	611.324	532.264	880.876	972.074	759.052	968.495	807.486	906.783	816.106	701.714	883.931	901.232	1612.42	900.271	854.046	1165.94	942.73	842.216	1083.77	939.09	806.566	1066.68	824.626	1399.34	1060.23	1180.54
96	628.196	0.430333	231.322	417.142	69.9442	35.0514	333.062	78.7864	45.0005	45.2285	42.8473	23.5737	18.7176	30.6879	246.071	39.2477	37.2102	40.3313	60.989	36.0565	13.0615	272.967	349.251	20.9114	66.9629	63.3853	23.022	38.4974	42.8159	30.9882	23.1021	25.3299	259.963	36.3632	17.3341
97	632.537	0.430333	259.825	1014.22	1083.57	896.776	837.809	744.515	808.302	815.482	697.783	1009.01	1148.44	1121.77	1099.87	986.951	965.977	1009.98	916.217	833.437	888.707	1149.79	792.319	810.544	1183.42	881.838	827.859	997.878	787.717	759.549	1088.49	751.893	980.467	887.394	941.305
98	634.532	0.430333	261.132	1087.53	835.4	717.234	918.809	818.161	814.289	933.422	762.947	1089.45	931.632	875.499	975.368	813.883	1023.76	783.042	916.843	850.236	1044.16	1163.27	953.095	875.62	1199.3	899.488	884.707	944.41	856.591	870.722	932.22	817.44	1218.06	992.602	784.835
99	637.307	0.430333	250.43	4174.7	1578.19	1083.54	5925.45	1702.6	1305.74	1339.8	1092.22	1787.09	2011.91	1463.72	6237.99	1399.69	1449.82	1461.14	1546.26	1329.3	1108.87	5299.56	3894.78	1205.21	2957.02	1252.87	1944.34	2168.24	1862.88	1971.94	1479.11	997.246	6481.47	1475.86	1127.85
100	637.535	0.430333	265.061	1442.24	1329.28	1101.82	1396.63	1072.01	1189.96	1299.81	1158.14	1319.25	1461.44	1245.89	1275.84	1211.34	1386.83	1285.2	1277.9	1193.66	1374.12	1545.44	1211.49	1271.43	1564.89	1267.93	1237.78	1425.68	1154.01	1102.13	1432.45	1199.54	1548.1	1479.64	1417.49
101	647.549	0.430333	264.975	703.575	453.793	334.244	596.582	402.312	360.365	434.808	360.924	516.867	521.578	363.109	560.749	390.833	476.552	367.191	439.26	321.255	433.246	688.715	439.498	485.633	537.168	370.975	471.016	522.669	422.305	402.526	571.438	347.768	714.786	614.388	429.113
102	649.516	0.430333	262.325	390.791	316.015	264.429	380.132	323.772	312.546	318.757	283.357	407.812	400.244	378.487	449.298	357.586	417.067	374.418	350.299	368.075	367.906	697.039	493.397	345.395	580.571	368.323	405.233	540.909	418.96	294.111	499.615	395.743	579.279	498.025	481.913
103	651.142	0.430333	232.54	161.626	14.8797	2.64955	94.4969	27.7122	7.34464	20.3837	11.3537	11.8207	4.60361	3.55255	60.5818	9.65612	2.16672	2.8395	6.02367	7.44644	3.56616	92.2488	87.3682	5.69147	32.663	8.48574	4.83788	6.97948	13.3421	5.00044	2.74725	3.71561	80.2073	0.146458	0
104	653.129	0.430333	229.739	189.458	28.1815	11.5612	104.972	46.2948	9.17865	16.6825	16.0856	17.2421	13.4073	14.7437	107.18	25.7805	8.61386	5.41709	22.1128	29.4933	6.06905	95.5301	120.379	15.3149	50.873	15.0933	18.062	18.9013	9.11259	16.6148	0.844745	8.15296	126.345	5.31433	0
105	653.548	0.430333	266.237	949.089	703.037	568.713	820.546	589.198	658.162	659.961	589.152	906.711	942.851	787.457	1055.73	761.84	801.468	833.697	735.876	691.378	765.385	1227.97	826.867	738.479	1037.89	745.93	774.514	958.874	764.443	726.372	860.175	686.821	1228.43	885.609	860.332
106	659.528	0.430333	262.243	539.863	405.041	323.136	484.544	326.936	377.234	378.911	346.289	508.207	464.118	366.876	605.271	340.883	454.69	402.016	445.963	356.907	430.493	795.393	484.602	387.281	561.458	405.226	396.419	424.932	401.992	435.781	479.442	322.603	996.978	438.141	340.606
107	662.569	0.430333	267.472	5513.8	3657.43	3346.15	4262.84	3501.22	5555.11	3833.41	3433.61	3985.87	4079.81	4736.91	4191.13	6422.26	3948.47	4498.36	3762.74	3477.68	3949.19	5089.3	3846.14	3834.57	5499.9	6088.93	6387.76	3761.58	4305.11	4090.1	4341.73	4991.85	5293.81	4057.61	3496.58
108	663.456	0.430333	268.77	98846.4	91981.6	82055.5	110140	86577.2	90510	92935	82047.7	98319.7	96751.3	89107.6	99827.5	89690.4	93028.1	86771.1	93406.2	84207.4	88235.9	113885	96905.4	87037.5	109341	90889.6	90341.5	96763.3	87300.4	81582.8	93389.4	89903.3	111660	96314.9	90812.1
109	684.203	0.430333	235.078	8255.37	733.529	446.019	5322.84	1629.89	430.479	416.209	450.383	799.016	381.862	295.153	2486.57	1090.1	227.979	245.639	516.41	729.773	313.686	2656.88	2414.44	657.061	1731.88	298.852	271.18	798.648	358.833	220.431	202.479	816.396	2222.23	245.232	134.826
110	685.437	0.430333	273.79	4981.06	1099.54	918.5	3057.39	1157.56	1064.27	1087.51	848.004	1326.28	1068	995.403	2650.14	1103.63	1138.31	830.509	1134.44	1094.23	1039.42	3548.28	2597.89	1058.1	3084.26	943.403	859.086	1205.04	916.127	790.47	1061.6	875.602	3325.06	1045.86	793.485
111	689.585	0.430333	273.758	399.323	382.59	302.648	339.099	266.787	275.354	303.615	306.794	378.838	385.808	278.309	395.755	298.579	326.934	317.255	348.762	294.805	359.273	424.042	327.328	339.375	392.365	333.28	303.573	370.883	298.329	314.207	413.839	263.343	440.626	381.443	310.221
112	700.236	0.430333	241.833	293.069	41.7201	7.16886	63.3358	40.7921	14.5175	23.189	13.1391	38.0154	15.6272	19.1755	104.616	24.4662	25.0179	15.0027	26.3337	9.4436	21.7945	136.787	78.2289	24.2526	64.8383	8.05562	21.2727	12.5565	14.9967	6.1547	15.9265	8.83605	93.4002	18.8701	12.5809
113	702.214	0.430333	240.454	1335.08	182.635	66.0758	905.226	195.9	119.394	113.429	110.311	76.7514	61.2756	65.5238	669.252	106.987	59.5833	61.3446	121.267	108.753	59.4754	770.368	979.008	57.5145	277.154	81.5842	43.0189	54.4347	56.7007	63.1913	58.4537	51.9111	879.861	38.0144	15.5878
114	705.503	0.430333	278.787	714.093	670.753	566.147	631.125	539.361	549.232	619.888	539.835	616.716	664.114	862.744	604.721	531.838	577.519	540.011	644.448	2499.63	4993.63	765.155	580.493	4792.12	26906.8	573.69	1770.54	611.143	535.846	527.651	566.564	495.296	1681.25	1357.13	556.137
115	719.526	0.430333	285.06	7191.12	6608.32	5446.7	6941.14	5741.76	6007.88	6481.58	5483.49	6885.86	7240.92	6040.86	5899.79	5993.04	6796.57	5958.57	6683.61	5899.59	7036.75	6938.81	5612.23	6398.99	10410.6	5963.45	6324.88	6968.77	5836.53	5298.53	6853.85	6046.83	7063.97	7324.06	6693.6
116	736.625	0.430333	282.394	168.903	119.052	120.423	155.229	140.006	117.66	152.069	127.393	140.246	145.51	143.554	145.728	160.381	166.642	128.998	126.361	117.076	113.254	155.979	110.535	110.021	146.83	136.932	133.689	157.079	150.947	140.209	165.991	139.937	174.664	135.694	101.203
117	737.545	0.430333	282.388	653.442	287.319	240.37	522.968	239.726	224.087	273.814	231.02	279.937	277.749	254.588	446.921	277.473	248.434	218.732	282.086	206.91	249.813	503.019	404.455	224.429	375.437	241.234	203.713	311.39	206.657	227.621	274.621	202.008	465.381	234.807	190.42
118	758.222	0.430333	244.193	7665.37	523.227	274.49	4436.05	1459.19	408.752	297.638	305.773	616.126	211.538	211.75	1967.43	924.308	210.021	151.459	433.273	573.441	210.847	2329.81	2051.55	549.747	1456.63	296.414	214.922	588.565	225.137	159.203	149.843	686.012	2250.01	200.252	70.5972
119	763.556	0.430333	296.067	925.706	877.187	705.508	892.868	780.887	761.019	797.136	728.677	887.345	958.295	793.949	826.262	724.36	910.458	766.354	898.215	932.913	1360.7	859.033	785.551	1194.33	3535.31	805.624	900.265	897.973	754.003	701.098	962.81	715.77	1078.58	1005.83	825.165
120	776.232	0.430333	252.162	1639.3	183.37	84.5167	1089.86	256.889	166.924	130.701	126.98	77.9885	89.7537	95.1241	746.906	123.015	76.3363	104.534	171.172	161.745	74.0843	844.115	1252.55	77.8775	409.941	101.876	54.2588	91.6936	83.3374	66.6817	80.5761	75.2414	1040.31	45.5	24.0136
121	787.486	0.430333	294.66	46.1231	22.7302	24.1545	38.7791	21.7723	27.698	37.3451	20.6605	29.4456	26.5649	83.5448	45.8159	34.3408	27.5234	27.1313	28.7173	352.009	745.544	47.0196	29.3204	755.822	5209.58	23.7997	197.013	24.7715	30.8833	20.6985	27.5055	20.4795	161.366	119.696	35.8852
122	795.628	0.430333	280.737	2355.73	1056.22	991.473	1584.54	1036.08	917.171	989.254	820.292	1841.53	1811.1	1319.74	3525.04	1424.65	1464.95	1763.51	1167.97	1187.57	1030.96	5424.24	1999.64	1017.13	2320.51	1288.08	1458.83	2418.44	2146.84	1798.86	2511.88	1356.63	8805.8	1310.4	1781.9
123	796.736	0.430333	304.515	885.047	816.374	701.703	722.271	637.907	649.982	631.175	532.316	1150.76	1135.63	827.902	1145.09	805.55	907.915	861.049	754.277	621.448	611.027	1117.74	630.559	599.156	661.142	706.34	750.375	981.935	1000.6	990.075	1427.7	665.631	1582.5	846.813	723.133
124	804.262	0.430333	257.324	89.5685	18.2495	14.924	38.3108	16.8353	6.30234	13.5599	0.637937	27.2466	24.8276	25.3714	196.199	22.3429	20.918	16.6143	4.67165	21.2349	17.1138	287.451	60.1128	15.3297	145.395	11.5939	21.7934	26.9442	22.0858	27.1659	29.6211	20.7171	319.038	14.4166	3.97354
125	817.611	0.430333	286.947	2469.98	2005.22	1587.31	2223.67	1611.24	1706.15	1910.01	1640	2250.07	2264.59	1909.75	2157.68	1910.44	2179.69	1829.39	1978.91	1661.72	1893.42	2731.56	2650.24	1653.26	2222.33	1868.44	1956.08	2297.29	1912.06	1697.67	2375.92	1810.85	3038.39	2314.71	2136.83
126	818.713	0.430333	304.376	680.816	500.228	400.986	635.306	433.385	396.872	459.533	424.755	647.591	652.585	521.384	722.266	575.681	610.483	540.683	503.742	425.782	465.312	752.773	488.799	432.413	582.732	483.931	569.493	741.666	549.374	478.932	662.57	506.482	799.255	620.433	644.263
127	820.735	0.430333	305.592	2534.55	2351.19	1949.46	2752.4	2021.11	2084.61	2245.41	1885.32	2966.28	2739.24	2333.31	3075.46	2392.3	2650.94	2496.36	2356.88	1959.32	2231.03	3142.24	2018.86	2008.63	2458.12	2149.27	2377.87	3387.47	2553.03	2273.44	3281.02	2290.31	3176	2655.47	2815.19
128	821.654	0.430333	301.894	88.9034	75.9109	64.6672	69.8224	73.9977	76.9018	76.0975	61.5765	87.6081	111.623	52.2978	107.386	89.0975	97.4246	111.719	96.8795	85.0856	69.9986	119.582	69.2613	69.0904	103.835	68.7279	93.6444	85.7565	77.4586	69.4297	97.9422	93.1158	108.463	102.064	92.9987
129	822.475	0.430333	275.466	284.748	237.906	181.236	294.944	192.617	215.6	219.783	189.677	227.914	280.603	229.326	254.278	215.802	236.256	191.509	266.948	208.291	192.197	255.986	461.164	200.908	271.987	212.646	205.387	243.209	189.027	201.064	245.698	187.043	272.215	274.915	170.583
130	822.754	0.430333	308.031	4689	3654.2	3303.39	3380.81	3303.37	3053.1	2695.73	2131.71	7841.02	7912.56	5025.55	6821.56	4973.23	5022.92	5833.78	3908.1	3150.22	2785.86	6709.06	2927.46	2875.14	3592.81	4180.91	4320.96	7083.29	6684.73	6036.99	9702.95	3734.93	9058.72	4628.1	5074.43
131	825.691	0.430333	304.333	421.55	378.311	245.722	360.002	265.104	315.242	313.34	282.632	448.804	493.102	376.794	481.6	392.927	342.977	432.731	383.35	295.387	308.621	555.263	286.18	284.743	318.562	361.55	333.934	526.47	414.866	397.127	571.062	314.733	509.207	447.233	429.69
132	827.707	0.430333	305.55	2796.86	2383.2	1886.32	2429	1907.98	2074.04	2255.59	1887.2	3006.76	3135.15	2365.1	2355.11	2446.37	2704.66	2304.07	2397.95	1915.98	2177.65	2742.19	1816.29	1934.97	2419.76	2257.54	2245.02	2969.26	2317.29	2202.2	3140.72	2079.96	3123.24	2860.78	2672.03
133	832.239	0.430333	255.855	2863.55	157.602	64.0914	1742.74	589.752	120.4	81.8642	76.4531	250.044	64.4826	61.9994	620.634	348.036	65.0415	60.3652	132.52	195.765	60.9021	625.877	586.251	194.929	486.339	82.9441	79.8313	238.083	52.9634	25.2215	35.4764	259.114	560.766	43.8074	10.6242
134	834.233	0.430333	255.845	3948.37	187.413	91.0138	1651.04	572.72	155.034	82.1669	97.5716	243.858	38.506	59.28	874.275	400.099	79.4159	50.5423	166.397	203.208	34.2233	854.63	817.814	196.33	677.614	84.8436	45.8917	224.753	63.3054	66.8785	35.6284	250.575	1023.42	47.6646	16.8521
135	844.73	0.430333	309.121	729.631	471.62	386.019	627.333	424.561	372.157	403.562	374.996	763.43	734.881	586.734	993.218	621.454	650.565	643.824	503.708	376.524	403.891	1078.27	503.961	403.177	602.352	501.426	524.634	978.347	597.349	519.058	758.401	518.542	878.287	606.023	725.551
136	845.543	0.430333	302.986	100.372	103.748	83.535	100.887	69.6699	83.3898	103.249	81.8165	109.523	86.7104	86.9884	109.346	93.5175	118.524	87.1303	90.1177	112.279	216.51	103.082	112.184	179.874	1047.27	102.376	118.788	108.932	99.8422	80.7811	120.185	100.111	124.251	102.342	102.149
137	848.287	0.430333	268.879	539.869	303.524	208.926	345.749	245.458	323.27	318.416	265.64	287.549	333.813	236.221	326.603	289.983	316.961	269.484	325.256	228.941	288.372	428.269	424.169	289.162	286.67	289.035	271.211	341.482	267.406	225.649	272.694	253.325	357.093	354.088	270.279
138	848.66	0.430333	311.535	388.132	321.842	259.21	342.816	258.092	264.365	291.281	217.56	363.921	350.345	324.419	383.61	332.883	360.874	300.29	315.599	292.435	279.547	435.58	316.054	267.754	332.159	282.23	301.957	404.045	297.575	286.551	321.922	316.066	392.123	293.068	358.558
139	848.77	0.430333	311.534	4106.61	2254.56	2524.55	3674.43	2314.02	1895.2	2170.5	1856.03	5544.79	5579.29	4267.42	5920.21	4079.75	3580.53	4618.58	2617.42	2180.83	1721.57	5044.13	2132.66	1641.57	2705.33	2401.75	3002.48	6789.73	5307.76	3708.79	6499.83	3039.32	4765.19	2845.92	4623.47
140	850.25	0.430333	262.354	1615.99	177.037	67.1155	1031.81	216.92	175.847	93.5136	125.923	99.9261	78.355	85.0718	569.118	115.871	56.097	93.622	151.191	112.481	79.096	733.094	1080	75.2117	398.43	102.904	43.1966	95.725	79.9451	61.3188	65.8901	85.5707	893.434	53.3295	43.681
141	850.868	0.430333	313.951	266.549	160.679	103.728	160.1	221.643	127.699	186.69	108.412	456.198	242.382	237.013	154.042	135.839	441.999	196.455	221.656	197.158	130.353	155.934	102.986	170.309	199.453	225.75	146.391	346.547	344.935	318.859	249.062	230.928	309.631	173.64	159.742
142	851.678	0.430333	307.859	1574.99	1509.87	1274.56	1528.49	1291.33	1330.58	1530.4	1174.13	1551.9	1597.3	1511.46	1707.18	1555.45	1525.24	1496.01	1504.61	1245.23	1430.32	1811.41	1269.18	1391.98	1485.31	1316.88	1432.98	1774.48	1292.75	1243.2	1573.4	1360.82	1580.47	1536.94	1662.74
143	853.719	0.430333	310.288	1061.7	911.821	811.126	1007.77	782.77	755.478	818.228	689.112	1228.02	1430.85	1020.37	1305.54	1051.01	998.36	1149.07	929.661	724.107	740.295	1269.39	699.333	743.175	870.279	803.422	848.026	1454.86	1128.67	899.607	1592.3	889.822	1318.36	1071.72	1351.87
144	863.687	0.430333	294.214	625.903	311.641	281.079	527.791	252.739	257.525	308.12	236.652	592.868	578.99	341.448	1026.97	336.652	346.902	381.009	367.151	400.687	360.371	1592.63	586.606	281.512	563.287	356.602	387.396	817.589	720.99	555.252	829.692	362.563	1755.3	412.711	537.982
145	866.728	0.430333	310.214	523.388	389.722	341.715	451.412	342.832	353.688	405.874	329.262	574.697	596.97	451.82	566.194	449.793	520.508	431.151	417.379	372.663	387.304	756.196	455.387	315.152	457.156	389.954	450.51	629.464	469.77	408.859	605.574	417.24	642.471	481.463	580.876
146	868.73	0.430333	313.848	2755.91	2361.33	1889.73	2754.63	2109.14	2132.81	2320	2006.24	2988.44	3164.35	2607.45	3277.43	2691.38	2949.78	2642.65	2534.53	2281.55	2433.06	4456.03	2584.68	2231.31	3032.8	2512.16	2623.76	3514.81	2721.09	2284.59	3259.53	2530.71	3514.26	2924.24	3123.64
147	870.737	0.430333	313.837	8653.08	8984.55	7798.65	9792.54	8155.68	8526.59	9025.75	7827.39	10392.2	10505.9	9028.84	9677.51	9255.11	9807.83	9062.8	9371.25	8188.69	8760.91	11259.8	8142.79	8265.49	9423.02	8833.06	8875.51	10929.6	9143.59	8030.13	10039.9	8970.12	10320.8	9998.45	10207.7
148	872.762	0.430333	316.245	2997.7	1586.25	1446.04	2497	1549.6	1310.2	1402.89	1222.88	2897.51	3171.98	2568.86	4350.17	2556.82	2420.47	2727.07	1825.13	1449.98	1332.73	4051.79	1743.93	1287.8	2027.13	1639.22	1992.99	4007.06	2311.98	1752.77	2803.9	2063.55	2993.41	2060.22	3166.52
149	874.783	0.430333	316.234	4109.35	1868.51	2001.18	3449.58	2037.77	1584.63	1936.46	1766.43	4385.32	4521.14	3629.82	4962.24	3644.79	3074.3	3934.52	2365.04	1713.19	1271.29	4097.22	1644.04	1291.91	2008.44	2042.76	2379.29	4993.97	3729.02	2665.54	4185.22	2358.03	3619.38	2234.8	3182.31
150	875.691	0.430333	312.596	273.352	209.011	202.192	271.934	211.435	211.017	211.495	173.598	277.328	282.924	278.129	273.727	221.668	246.911	225.832	261.915	192.863	236.234	366.545	234.477	195.692	348.243	252.877	243.38	356.283	230.889	235.981	283.204	227.678	301.538	256.166	279.614
151	877.689	0.430333	313.798	522.077	407.858	372.301	538.009	306.041	340.166	408.503	375.261	494.285	510.362	488.886	644.599	451.879	418.344	456.986	441.839	358.725	403.881	651.389	419.631	383.716	492.268	402.676	426.54	589.213	425.181	339.61	570.557	403.926	496.427	470.166	577.487
152	879.739	0.430333	314.997	940.799	699.377	543.665	711.229	637.917	560.934	706.967	522.702	1156.84	1317.18	940.612	1207.61	1041.35	941.499	1100.64	789.806	619.659	546.585	1352.86	745.086	608.261	745.687	824.867	897.474	1392.58	1030.28	757.168	1551.03	780.671	1218.52	1040.05	1273.01
153	881.757	0.430333	316.195	2415.45	1971.52	1678.36	1998.51	1798.79	1732.64	1879.08	1599.44	3547.03	3583.04	2510.14	2746.53	2567.36	2716.04	3031.94	2240.11	1730.42	1662.31	3196.37	1754.97	1537.7	1868.71	2174.28	2280.49	4172.79	3332.33	2172.32	4305.36	2191.87	3325.37	2739.15	3465.2
154	885.367	0.430333	307.672	265.424	50.4914	28.9005	304.545	237.802	63.3207	43.6336	33.526	53.4026	57.5242	56.4506	279.711	49.2199	66.8627	45.3199	61.6797	56.8878	42.4636	505.582	399.503	132.783	335.967	94.9372	50.1175	99.7639	107.712	101.962	107.496	271.626	683.981	93.344	57.9196
155	885.665	0.430333	301.534	442.55	402.439	285.284	383.5	294.846	304.045	379.311	248.211	368.036	471.398	326.188	394.898	342.093	343.773	349.754	327.882	304.609	343.915	536.879	337.677	285.017	425.832	339.816	389.476	458.452	391.032	289.111	503.442	369.949	523.126	443.161	569.5
156	892.734	0.430333	314.927	419.136	225.81	221.295	342.969	216.914	206.204	216.092	231.702	380.218	419.371	324.746	518.19	353.559	411.397	344.679	281.936	280.185	336.351	779.013	393.412	290.078	552.413	263.855	330.767	545.526	361.542	269.792	446.17	291.106	539.592	371.994	422.974
157	894.752	0.430333	317.331	1425.85	945.654	769.844	1255.85	816.533	814.412	910.217	787.72	1743.63	1774.39	1409.31	2384.83	1562.49	1553.01	1474.94	1097.57	1390.39	1281.38	4380.53	2027.25	1002.3	2120.46	1303.17	1476.94	2487.38	1798.66	1252.94	2033.13	1225.87	2808.58	1356.9	1736.57
158	896.769	0.430333	320.927	2807.04	1403.61	1328.23	2121.61	1532.21	1305.87	1321.61	1131.12	4341.61	5182.61	3295.87	6410.62	3741.62	3561.06	3807.26	2158.76	3282.79	2624.12	12185.3	4524.57	2234.16	5147.91	3098.11	3511.25	5987.71	4828.77	3080.5	5562.38	2594.41	8305.06	2754.84	4015.44
159	898.777	0.430333	320.917	16070.2	14304.7	12643.5	17077	13542.6	13264.3	14155.7	12325.7	20387.3	21336.8	17437.3	20875.1	17632.4	18170.6	18992.7	15987.6	14255.3	13796.7	23977.2	14279.7	13353.5	16192.9	15449.3	16524.7	24921.7	18478.1	14355.8	19939.5	15955.3	20468.1	16887.5	20491.1
160	901.72	0.430333	318.498	382.83	228.977	220.506	339.868	258.62	271.153	203.462	243.201	452.161	482.922	352.242	625.05	309.107	376.422	388.874	303.491	349.934	328.416	1204.61	566.057	267.876	608.273	368.432	436.796	591.776	375.042	313.957	532.901	345.468	643.014	378.324	522.467
161	905.756	0.430333	319.679	1501.75	958.381	915.508	1228.76	1014.53	909.158	1086.12	877.853	2030.1	2348.24	1529.64	1772.56	1801.5	1559.95	1968.49	1274.43	1143.06	854.69	2148.07	1362.26	878.993	1023.08	1232.08	1323.38	2969.61	1982.06	1294.52	2607.81	1319.71	1779.62	1517.67	2211.7
162	906.257	0.430333	269.898	2525.73	140.564	36.7828	1410.45	491.357	105.317	53.1577	64.4903	233.062	46.137	62.9915	560.894	379.44	39.7109	37.0865	101.34	221.35	62.745	487.241	436.625	194.566	429.673	85.1538	81.6374	242.254	48.6694	22.583	10.4362	241.333	370.5	41.8373	9.61792
163	908.251	0.430333	269.889	3197.33	172.977	73.5883	1359.29	510.813	117.889	65.6669	66.476	233.967	47.4461	76.7966	677.088	360.209	41.8068	70.4677	146.515	205.537	59.0571	634.774	559.635	202.267	544.643	82.2016	48.4662	220.907	55.5005	50.1993	40.4735	260.012	783.878	43.7022	16.8151
164	912.237	0.430333	271.163	235.292	5.8934	0	84.0918	17.2504	2.8934	0	0	2.85425	0	0	43.4547	0	0	0	2.69104	2.78833	0	44.515	45.0258	1.00854	36.6299	0	0	0	0	0	0	4.86328	59.787	0	0
165	915.709	0.430333	316.015	2863.79	2676.28	2190.49	3057.08	2408.02	2529.56	2904.45	2221.77	2966.06	3084.72	2654.57	2577.38	2678.64	3102.89	2585.52	2891.48	2374.99	2882.45	3208.99	2372.81	2473.06	2979.86	2651.06	2720.14	3157.71	2397.81	2295.21	3031.11	2658.93	3145.79	3132.43	2981.15
166	917.713	0.430333	318.414	5306.21	5435.14	4467.06	5986.43	4659.64	5020.56	5449.28	4395.25	6037.06	6209.3	5297.74	5403.4	5341.3	5956.36	5178.09	5705.87	4847.37	5474.69	6843.82	5032.05	4931.27	5859	5321.5	5225.55	6098.83	5250.27	4626.11	5997.48	5204.62	6545.66	6335.8	6228.67
167	920.765	0.430333	321.999	1043.02	374.523	320.912	827.976	403.839	356.182	372.25	369.493	999.459	1102.65	928.542	1865.79	1022.12	950.27	1028.38	612.902	684.295	567.807	3038.43	1233.88	468.357	1177.25	711.985	859.717	1637.42	939.241	585.578	1015.14	760.394	1460.15	814.462	1279.3
168	922.784	0.430333	324.379	2322.12	864.426	848.638	1550.08	1055.06	840.749	802.711	799.463	3508.13	3904.49	2375.91	4935.56	3226.33	2790.36	3200.32	1465.65	2855.88	1821.06	10541.8	4925.55	1720.55	4318.57	2478.63	3085.32	5707.5	4171.59	2384.99	4684.59	1855.08	6640.14	2095.27	3358.99
169	924.267	0.430333	276.246	1603.34	123.895	50.9718	880.61	150.011	109.626	62.3114	81.3607	67.0013	65.971	59.5415	537.72	98.1944	61.6778	61.9042	115.927	101.532	49.4811	727.164	873.99	47.9995	323.724	68.5978	21.676	77.528	64.337	28.8807	28.1893	72.1926	861.177	22.198	11.5397
170	924.799	0.430333	326.751	5282.52	2445.94	2278.84	4160.29	2773.01	2275.68	2268.38	2203.65	8428.92	9523.89	5616.6	9061.69	6889.42	6704.21	7914.58	3811.62	5486.77	3597.55	14581.1	5668.1	3580.1	6010.26	5590.51	6287.16	12463.5	9492.97	5224.39	10441.9	4647.67	11353.2	4962	7901.04
171	929.755	0.430333	325.535	468.659	250.334	188.508	350.983	226.056	221.26	210.972	229.549	553.283	753.592	426.174	691.717	627.409	481.043	588.003	351.815	416.538	274.841	1092.15	471.291	332.798	534.377	434.277	411.285	918.382	559.817	347.477	906.703	395.149	817.156	492.545	779.571
172	931.765	0.430333	326.715	929.669	645.181	520.1	781.795	556.616	512.326	600.306	498.96	1355.66	1364.01	926.324	1005.31	1012.31	1052.69	1189.82	691.647	643.836	536.007	1294.02	601.057	517.445	703.292	759.899	821.168	1818.19	1237.84	687.547	1516.93	800.04	1213.75	1000.13	1495.88
173	941.696	0.430333	323.089	745.004	608.86	411.51	635.326	431.408	547.073	666.561	397.686	736.009	773.704	569.492	599.517	578.023	707.943	585.375	621.497	525.854	582.431	983.439	773.509	464.442	690.229	552.04	608.355	884.529	590.768	470.894	737	561.89	723.81	725.584	780.399
174	944.749	0.430333	325.46	1808.09	1538.9	1224.37	1742.46	1416.9	1404.54	1585.74	1214.41	2015.82	2154.18	1671.95	2174.53	1869.86	2033.06	1780.64	1730.75	1677.31	1789.56	3526.96	2086.86	1516.83	2097.2	1766.27	1836.25	2684.69	1797.34	1456.97	2113.26	1702.37	2556.87	2119.87	2206.99
175	946.768	0.430333	326.64	2141.2	1688.6	1253.65	2067.87	1403.89	1503.84	1730.2	1331.76	2334.87	2412.7	1975.2	2396.54	2073.09	2156.07	2036.88	1871.72	1658.32	1841	3455.16	2011.17	1612.81	2173.6	1882.44	1996.77	2716.43	1937.04	1498.42	2363.82	1835.56	2684.34	2201.48	2440.52
176	948.796	0.430333	330.188	1094.07	425.501	382.381	869.452	501.227	414.422	456.733	442.577	1239.29	1413.8	989.705	1726.93	1146.45	1064.95	1265.63	725.977	730.67	652.092	2760.93	1268.53	560.167	1119.62	814.185	968.278	2309.91	1062.45	677.282	1122.63	969.851	1558.5	1004.7	1512.79
177	950.812	0.430333	331.361	2284.14	947.536	997.718	1915.48	1116.33	993.549	1034.36	1007.07	3022.87	3158.72	2215.31	3147.96	2601.41	2419.98	3107.6	1493.96	1822.27	1224.9	4638.1	2399.97	1215.2	2017.35	1986.53	2114.54	4437.65	2973.85	1762.44	3252.86	1735.48	3078.8	1925.07	2661.76
178	952.298	0.430333	288.786	97.2845	5.40431	3.62488	42.4065	8.77446	9.56486	0	0	24.9155	39.7567	13.2987	243.602	16.8436	13.8636	10.1269	0.713653	19.8765	16.4554	280.237	57.5945	14.787	150.265	8.79509	12.0098	20.6117	35.7001	23.4162	29.2466	15.8804	282.366	20.2518	4.00302
179	966.745	0.430333	326.543	71.4693	42.2135	35.0076	69.3204	57.3861	47.9503	53.9068	24.3235	111.814	91.6455	64.8021	126.914	79.7842	92.5002	52.8567	82.6015	89.8942	108.574	273.469	300.959	73.899	153.994	77.9571	57.107	145.279	52.33	55.615	90.9799	73.0929	159.005	57.4779	87.8457
180	968.766	0.430333	330.091	195.988	87.2961	66.5046	159.182	85.3709	101.769	97.0004	56.4879	263.23	312.956	212.671	476.842	265.029	276.363	225.882	174.13	299.789	279.426	1550.16	781.256	206.144	531.471	246.315	242.361	456.95	299.424	162.731	365.554	166.381	717.689	195.519	300.69
181	970.775	0.430333	331.263	398.588	330.877	229.496	390.895	208.79	280.503	310.179	196.582	518.407	549.78	406.002	643.9	473.883	408.412	434.095	339.563	422.598	352.525	1401.22	736.672	325.259	626.515	360.605	442.276	811.643	473.711	306.786	572.493	382.448	764.933	504.695	581.463
182	972.795	0.430333	333.613	967.802	502.858	385.951	868.395	518.204	451.55	519.464	453.782	1116.66	1360.55	887.236	1696.09	1013.22	1119.99	1189.68	700.364	1053.23	761.842	3911.36	1668.45	727.827	1576.77	1016.86	1108.83	2082.85	1350.98	884.07	1492.06	862.668	2381.73	979.093	1389.33
183	976.825	0.430333	337.118	1019.01	422.742	386.561	822.694	445.863	355.772	477.64	462.905	1134.08	1247.71	852.555	1160.45	883.196	935.514	1141.41	575.888	589.278	408.971	1495.77	807.757	409.881	722.575	649.638	685.213	1345.56	902.376	593.091	946.583	560.45	965.225	621.234	909.584
184	980.276	0.430333	283.636	3322.97	222.592	64.91	1475.69	587.37	117.047	99.8952	59.8181	353.26	93.1153	52.9468	689.105	414.366	78.342	29.3624	137.552	259.33	115.184	819.087	700.361	248.701	531.398	97.3864	138.493	333.434	114.229	36.9508	27.3093	312.038	636.616	43.682	20.3453
185	982.272	0.430333	283.628	4520.96	238.25	82.7112	1810.14	626.853	138.451	124.68	88.1276	394.722	81.623	84.3738	833.87	488.691	89.0013	47.194	134.649	264.185	110.254	1056.72	849.048	273.651	732.162	125.571	99.8744	314.802	90.6355	79.0434	52.498	346.089	1055.82	65.2413	11.524
186	983.865	0.430333	330.02	2610.77	2470.46	1774.55	2901.74	1918.81	2169.91	2543.04	1931.81	2869.09	3059.53	2325.88	2437.08	2173.26	2663.96	2317.53	2599.51	1981.22	2241.24	3187.12	2119.53	2148.12	2560.54	2276.51	2182.98	2798.18	2280.57	1817.91	2668.02	2179.17	3041.02	2992.02	2465.17
187	992.744	0.430333	334.695	256.291	226.41	172.573	197.625	191.845	183.051	212.857	191.751	450.812	432.789	288.068	570.201	369.169	366.505	354.229	251.141	255.889	320.775	1119.64	1886.21	214.699	462.913	272.542	270.442	340.404	211.586	168.07	284.423	189.91	424.698	274.114	264.394
188	996.795	0.430333	335.851	156.324	89.2983	35.2402	145.719	74.8992	63.1698	75.1653	58.9677	196.121	215.753	108.731	278.652	150.58	181.713	132.377	121.897	157.295	154.5	763.119	390.982	115.543	265.138	144.874	158.873	278.585	165.795	104.521	207.568	103.512	326.879	146.057	189.918
189	998.285	0.430333	288.596	1144.53	109.06	43.2428	660.071	122.118	106.969	53.7262	62.8922	64.1637	44.204	41.0801	428.74	70.19	32.3575	63.2975	116.835	77.5859	43.2689	546.928	775.996	42.6233	293.321	48.2926	28.1274	57.5203	54.3163	32.8598	26.0693	61.5853	605.556	19.9139	3.00018
190	998.809	0.430333	338.186	199.121	100.881	87.5027	147.769	68.9977	110.475	97.9217	66.7374	245.605	278.208	193.251	325.117	212.8	219.066	183.115	141.372	170.732	114.893	721.575	348.103	126.719	305.282	176.337	197.627	302.367	244.203	152.163	264.893	122.362	382.738	154.181	183.366
191	1000.81	0.430333	339.346	724.822	440.405	282.477	598.843	362.048	341.423	435.241	376.111	771.537	761.944	542.367	757.198	540.247	671.757	663.061	513.443	455.605	441.948	1139.59	661.587	396.3	643.127	532.405	500.196	775.154	615.057	403.923	728.228	393.418	796.416	591.965	620.485
192	1026.82	0.430333	343.887	1391.33	1504.03	1048.79	1742.33	1285.58	1404.59	1497.71	1183.53	1738.48	1812.54	1469.19	1483.76	1491.85	1684.35	1344.12	1579.74	1243.51	1404.74	1960.12	1316.86	1322.87	1608.83	1536.53	1475.67	1892.51	1430.35	1094.4	1741.48	1416.12	1929.9	2041.58	1938.76
193	1054.29	0.430333	297.096	10285.8	549.063	169.808	3741.53	1575.23	328.437	670.013	179.121	1822.03	436.91	201.733	2695.35	1100.72	152.453	133.78	407.106	887.788	597.44	4822.34	3075.16	675.818	1402.91	270.779	512.875	1008.17	644.9	219.794	120.881	836.064	3713.82	176.923	44.4137
194	1072.3	0.430333	303.183	1258.02	71.8845	17.3237	694.888	128.808	70.3371	39.7046	54.4938	43.5917	32.0542	40.3784	387.56	59.0654	29.9822	50.4736	85.8603	62.5666	29.0756	502.706	655.091	50.227	256.798	32.9441	15.0654	35.54	39.4686	22.9476	23.8696	78.9629	588.157	11.3535	11.5827
195	1100.33	0.430333	317.631	172.669	16.8516	17.0919	75.4337	16.0177	3.48172	6.03064	0	32.2007	42.3178	23.8727	330.645	10.4678	16.992	22.2639	5.49548	11.0895	8.16449	380.956	80.6461	10.9614	217.392	25.8698	15.3805	19.9893	23.3246	24.6458	24.8791	0	404.163	12.6401	6.46241
196	1129.31	0.430333	310.296	12191.1	675.548	250.508	3338.68	1666.83	497.8	1710.45	272.134	4287.51	1059.46	400.956	4709.6	1248.09	238.566	180.738	502.421	1586.4	1506.52	8722.56	5587.35	841.247	1337.09	362.237	1195.4	1396.96	1876.94	539.095	132.593	870.611	6219.43	239.439	87.1879
197	1148.32	0.430333	316.265	517.272	19.0834	4.20911	247.863	34.0472	13.0811	8.74805	9.90785	12.0079	9.93428	5.08234	137.574	26.0427	3.30081	9.62134	22.9789	17.5355	0	192.345	257.01	11.5983	106.498	8.97772	11.077	16.799	8.22736	3.06604	2.58661	16.8615	216.744	6.97705	0
198	1175.36	0.430333	335.153	155.294	6.09271	8.09692	56.3025	2.44228	7.02826	5.46486	2.48087	38.089	43.1626	25.4414	293.234	21.2396	12.4345	22.8505	7.01794	14.349	6.46204	387.551	75.5099	9.69936	199.791	28.7738	20.7773	30.6744	28.3438	15.9097	33.3186	12.4844	397.869	10.1535	7.9588
199	115.053	0.46415	162.827	811.65	962.803	853.136	992.16	876.48	924.13	1032.9	853.945	1024.44	1039.35	897.793	944.173	960.855	1041.15	965.121	1051.12	853.407	968.778	1029.83	838.307	977.593	1002.5	994.658	1011.43	1007.62	903.527	778.234	1006.62	1092.03	1122.81	1127.7	1342.31
200	126.045	0.46415	157.768	224.535	261.168	186.49	293.3	218.509	235.875	270.174	205.016	272.992	289.889	230.741	222.587	231.61	273.506	239.639	290.842	217.942	258.296	315.128	230.211	252.958	322.402	256.788	285.87	280.781	221.873	204.326	294.839	307.639	318.128	354.935	420.595
201	128.062	0.46415	155.699	3472.57	4369.07	3742.78	4385.77	4128.48	4282.85	4452.71	3842.34	4347.03	4408	4121.53	4170.92	4168.34	4528.16	4430.64	4488.31	3991.63	4163.99	4546.21	3940.76	4326.15	4702.4	4521.84	4518.22	4386.5	4081.47	3837.26	4530.42	5034.33	5064.91	5073.5	5924.32
202	139.056	0.46415	154.59	476.885	537.406	423.415	534.55	468.155	471.67	594.878	440.524	573.631	529.408	514.601	508.917	577.034	550.645	537.026	521.471	459.982	551.093	600.559	424.405	550.274	604.646	537.552	596.939	626.705	486.546	433.807	588.526	670.233	676.113	674.531	792.614
203	141.069	0.46415	154.405	3436.88	4192.32	3695.79	4263.9	4040.57	4185.1	4403.88	3722.72	4299.79	4363.34	4104.63	4115.19	4317.49	4544.25	4399.86	4557.95	3956.04	4116.8	4363.62	3726.87	4303.38	4782.74	4464.96	4581.1	4361.74	4007.18	3641.77	4379.68	5172.45	4940.97	5052.31	6273.58
204	153.069	0.46415	153.399	5482.6	6295.9	5605.58	6454.07	6071.28	6273.43	6533.86	5805.74	6505.67	6392.35	6223.08	6116.37	6401.75	6522.8	6521.73	6526.69	5914.8	6292.62	6623.22	5672.94	6424.67	6995.54	6607.21	6606.14	6471.5	5951.33	5696.09	6582.65	7214.54	7011.11	7350.33	8392.08
205	155.083	0.46415	155.059	2713.72	3356.97	2899.68	3338.42	3202.09	3334.5	3415.79	3078.73	3450.57	3437.46	3283.28	3244.01	3527.11	3558	3525.28	3533.89	3178.83	3423.02	3512.54	3018.37	3461.12	3804.57	3562.51	3679.47	3469.88	3169.4	2970.73	3415.85	3963.03	3850.31	4032.74	4689.99
206	167.082	0.46415	155.999	658.64	500.007	476.936	574.522	629.849	601.545	657.375	504.343	572.192	561.612	557.342	581.053	763.475	716.3	734.164	664.499	598.42	733.681	673.791	523.427	912.637	1267.29	792.588	836.044	565.219	503.358	466.814	592.899	1284.91	987.176	1148.47	1906.26
207	173.128	0.46415	160.926	292.028	267.614	232.507	289.071	288.793	302.92	276.506	259.367	269.605	275.635	250.394	241.436	280.356	326.331	292.225	288.472	302.405	358.2	315.879	244.608	415.608	514.702	336.583	338.462	267.925	247.837	233.99	281.457	392.87	366.454	392.813	456.887
208	178.079	0.46415	155.306	2014.86	1919.74	1650.39	1937.64	1943.94	1956.64	2122.09	1809.93	1989.16	1969.88	1908.09	1954.45	2136.18	2098.02	2131.14	2161.31	1938.19	2179.29	2086.68	1809.9	2295.84	2725.32	2148.29	2259.83	1986.35	1821.16	1747.49	1956.99	2796.1	2438.09	3017.43	3892.41
209	181.094	0.46415	158.674	897.003	753.559	700.163	748.982	759.793	796.349	794.865	716.786	797.339	785.896	800.631	735.003	877.699	835.502	887.352	896.969	766.667	915.024	804.403	691.158	1009.92	1191.28	847.512	950.181	786.742	729.492	651.517	778.125	1140.15	1065.71	1277.4	1623.35
210	199.144	0.46415	164.651	283.426	251.962	208.848	245.418	309.123	270.242	305.518	260.562	271.895	255.959	253.44	245.262	353.941	350.939	370.738	317.32	260.921	339.171	274.416	233.201	429.914	539.541	344.869	417.399	262.445	236.908	233.662	281.397	651.434	437.338	516.265	998.684
211	203.175	0.46415	169.568	63.5116	41.8286	52.9222	58.173	61.3155	60.1622	43.0786	49.4049	61.1129	55.7455	56.7893	58.815	60.2644	64.493	67.4403	65.848	80.9036	90.7462	74.0618	50.3925	120.325	100.852	73.3866	63.1094	71.6128	63.0685	52.3315	60.2687	90.7423	91.3205	94.546	127.333
212	215.089	0.46415	162.18	314.941	258.215	192.68	291.725	213.396	233.881	274.808	237.305	263.008	280.94	259.832	262.262	239.077	267.759	219.141	259.97	273.484	305.45	353.376	291.944	367.39	526.252	276.484	275.753	262.496	226.87	213.257	270.348	264.509	287.293	334.969	298.627
213	239.172	0.46415	173.022	455.827	422.19	362.566	394.156	519.123	485.103	516.932	444.178	370.761	473.7	419.392	397.904	595.11	598.359	557.497	503.171	527.574	728.695	459.579	411.175	844.133	1029.57	641.877	658.968	421.999	446.521	403.081	446.292	1079.79	713.824	884.619	1534.83
214	248.233	0.46415	182.504	57.6456	58.6173	49.4886	66.2459	74.0952	65.8177	54.9508	51.4802	60.7252	68.7859	64.8385	52.1553	54.3275	56.6291	45.4394	61.8939	69.0883	82.7362	56.6579	52.6145	95.0139	89.7737	76.697	77.551	60.2156	54.4781	51.3476	57.3284	89.0857	73.9065	76.3188	113.878
215	252.268	0.46415	191.938	30.0989	33.6288	28.281	12.8482	31.9986	23.6996	17.0801	12.6198	84.965	83.3059	51.8012	55.1584	45.4177	42.5322	59.4204	35.2207	55.7975	14.4712	56.2825	23.5134	19.0064	26.0081	46.0953	51.9725	133.956	70.7481	60.5763	95.5427	36.4064	57.4608	49.474	43.8643
216	253.188	0.46415	175.813	327.522	314.221	305.92	258.097	367.631	330.335	329.745	319.41	316.379	309.265	315.413	280.447	410.801	422.996	437.685	411.53	433.078	631.846	319.44	254.164	706.035	882.467	451.846	513.206	315.006	248.247	310.952	343.141	813.023	579.817	686.584	1217.32
217	257.22	0.46415	180.564	228.649	202.928	175.353	209.17	249.005	234.907	241.818	210.928	221.151	239.627	234.504	228.457	266.787	261.239	308.636	242.878	451.863	686.5	303.878	267.513	917.579	1096.63	298.057	401.45	242.254	235.239	188.313	211.419	545.649	398.717	484.006	838.512
218	264.269	0.46415	194.643	1615.66	1567.16	1366.59	954.637	1618.55	1427.97	990.948	759.128	3687.72	3236.66	2721.79	2563.21	2431.82	2222.62	2866.94	1754.55	2497.09	1527.31	2594.59	1164.95	1763.16	1446.56	1829.1	2069.62	4190.43	3133.7	2617.75	3345.28	2126.41	2696.25	2328.09	2674.31
219	275.23	0.46415	183.199	194.629	106.2	92.085	130.646	145.239	111.388	116.972	118.88	113.077	85.6313	99.7971	86.5776	131.273	127.384	132.975	125.298	114.93	136.779	112.297	98.7122	175.884	157.551	150.015	117.058	92.2488	86.1741	106.294	107.111	219.593	130.173	182.329	357.442
220	280.203	0.46415	183.049	346.466	299.26	251.505	286.054	296.271	303.496	297.829	288.788	303.181	312.817	352.569	304.988	310.797	305.829	307.035	294.285	673.737	1087.68	395.141	293.308	1242.03	2042.93	318.157	555.831	306.481	279.702	262.462	338.489	467.275	504.343	583.515	600.803
221	300.992	0.46415	174.417	0	0.667349	1.0177	0	0.765538	0.492955	1.55637	2.07615	1.43454	4.13265	20.7251	1.28897	0.447471	0	1.19476	0.376209	116.985	291.382	1.44995	1.41277	227.783	401.309	0	63.2958	1.09736	0.447802	3.68793	1.4212	1.95837	12.8218	40.657	0.00434451
222	301.216	0.46415	188.804	372.42	362.743	341.503	351.787	605.494	565.119	445.705	347.075	430.17	372.958	376.327	345.099	965.609	846.091	1266.41	753.574	368.675	443.655	419.58	340.437	1001.43	984.576	1878.15	1541.63	609.843	483.28	454.034	922.127	5329.21	2608.28	4574.99	7877.45
223	303.232	0.46415	190.319	775.508	747.104	693.478	710.73	3100.51	3122.5	2494.73	2007.99	817.629	751.456	729.407	762.569	5230.48	4210.38	6128.98	4633.42	989.684	1260.85	838.032	653.357	4221.89	4267.58	6109.54	5517.49	1173.81	776.908	802.078	1032.71	13592.3	6546.49	9819.81	20764
224	303.409	0.46415	190.315	0	0	0	0	22.958	21.9673	15.9464	0	0	0	0	0	70.7745	41.9917	101.855	56.0498	0	0	0	0	21.6872	16.4859	80.9982	76.7309	0	0	0	0	430.392	128.733	241.572	930.435
225	303.642	0.46415	190.308	0	0	0	0	14.5893	14.8642	0	0	0	0	0	0	71.0769	33.1668	97.9963	47.5956	0	0	0	0	16.7304	11.1183	86.7546	78.341	0	0	0	0	430.921	123.353	246.427	819.531
226	310.309	0.46415	200.958	412.967	298.537	314.755	352.647	267.744	384.414	288.376	227.877	411.839	358.437	698.663	389.994	318.203	331.707	326.537	330.278	1855.9	3332.25	477.52	266.047	3145.39	3984.9	291.345	1175.65	347.864	309.454	239.922	382.41	330.669	528.164	923.13	302.176
227	321.313	0.46415	200.673	442.581	338.545	323.495	513.423	308.16	502.205	446.941	305.958	314.807	361.126	385.938	369.959	479.343	368.438	498.367	373.737	281.117	265.105	449.035	364.077	281.219	233.211	437.631	325.08	519.757	366.19	361.311	606.699	314.001	346.444	369.226	199.049
228	331.257	0.46415	197.373	2901.56	2603.96	2378.96	2688.28	2430.71	2341.86	2593.62	2336.93	2666.49	2572.63	2338.63	2448.08	2810.39	2839.59	2565.1	2714.74	2494.48	2966.22	2840.21	2193.64	3244.56	3710.46	2593.74	2763.36	2644.94	2281.32	2347.19	2491.65	2577.15	2906.12	2898.16	2870.81
229	336.321	0.46415	204.86	1256.99	1334.67	1260.38	1384.36	1319.09	1479.24	1438.98	1245.19	1564.87	1586.66	1474.85	1507.45	1536.95	1438.49	1625.95	1451.59	1443.11	1618.85	1502.82	1285.3	1684.42	1846.61	1494.02	1557.92	1564.66	1611.54	1494.13	1644.26	1634.78	1613.7	1653.72	1864.32
230	337.106	0.46415	187.946	291.182	327.482	321.742	347.692	224.304	231.644	253.195	235.274	249.399	226.915	311.866	294.724	205.274	227.621	215.242	256.034	409.659	487.822	483.028	243.645	661.338	760.443	215.828	295.354	262.865	221.674	218.042	280.927	173.936	215.834	284.834	163.975
231	338.342	0.46415	207.82	28157.8	37684.4	36002.7	40619.2	37962.5	68132.8	38628.7	35684.1	37359.3	37966.3	65711.8	47074.5	61682.7	38428	62208.4	38194.1	38622	36929.7	39860.6	37459.4	49655.3	42782.3	68511.5	67027.4	39382.7	52727.2	36049.2	40525.7	63274.6	37542.3	38017.1	33889.8
232	343.221	0.46415	204.702	702.179	653.696	592.059	767.434	670.471	713.571	715.406	677.485	717.142	713.865	640.834	621.825	696.79	791.075	743.494	808.98	789.417	1028.72	726.169	602.303	1119.72	1732.76	852.836	835.471	717.018	629.824	601.276	702.631	1195.87	859.08	1163.65	1993.43
233	350.283	0.46415	200.006	202.177	212.598	187.034	212.972	334.99	295.259	265.548	233.328	178.682	195.947	269.963	163.863	400.497	355.266	384.107	318.013	622.368	1125.17	209.982	182.52	1316.61	2156.29	416.267	619.551	207.1	159.598	162.604	225.044	811.893	507.066	841.618	1290.79
234	352.3	0.46415	202.995	5250.79	5596.09	4988.29	5790.99	5857.84	5823.14	6041.21	5403.49	6034.16	5989.46	5636.73	5257.79	6477.56	6132.27	5815.88	6075.8	6072.64	8151.57	6137.75	4991.29	8302.34	10808.9	6134.12	6912.13	6062.7	5333.67	4963.85	5773.07	6295.73	6634.65	7295.31	7583.93
235	352.352	0.46415	211.972	44.1003	32.054	22.3985	48.3681	28.0488	48.2052	47.6221	41.8472	46.0442	40.4592	52.3414	41.4255	37.1053	39.3587	49.216	50.9444	67.5499	99.5901	52.6576	24.7705	80.5352	124.604	35.5435	57.7714	40.7914	37.3941	35.5497	38.3805	45.3995	63.2117	46.4777	38.7686
236	353.261	0.46415	201.462	173.858	214.847	174.602	172.723	163.755	194.763	185.587	204.631	261.133	284.983	297.614	264.15	180.29	214.63	216.818	189.631	303.039	305.095	285.841	246.835	239.413	282.042	202.093	271.176	297.815	240.68	178.504	186.131	216.605	218.78	216.991	394.772
237	361.281	0.46415	202.809	649.288	503.083	463.271	517.449	647.406	586.033	587.546	527.683	630.365	575.586	546.271	627.017	762.995	788.927	859.298	766.628	799.517	1219.36	778.994	519.471	1469.15	2383.83	958.233	1102.55	608.99	567.598	590.903	737.259	1937.3	1361.25	2441.98	3163.8
238	362.337	0.46415	207.293	67.3448	53.2169	65.7429	79.6044	86.6516	60.0601	61.3926	67.5918	100.225	62.9572	84.4863	55.6601	57.3563	121.706	50.9608	67.0572	218.8	419.314	61.9121	61.8938	282.819	447.306	54.66	143.196	70.4415	66.4343	71.5505	73.0015	96.9981	81.7283	106.993	57.7957
239	363.304	0.46415	204.275	1982.77	1882.13	1781.48	1970.62	3976.49	3303.49	3381.89	2736.89	2410.58	2295.59	2127.87	1940.8	5069.87	4295.34	5350.31	4542.88	2874.24	3607.44	2211.99	1806.89	6149.61	6781.08	5876.86	6101.89	2602.26	2235.76	2190.92	3295.93	14026.3	8737.82	13274.3	20638
240	364.357	0.46415	211.714	92.4315	37.6409	59.6395	56.3513	188.148	88.9253	70.2067	70.3604	90.1527	58.0014	273.362	55.4028	161.763	425.189	208.145	164.856	1351.79	2455.1	68.1884	45.7812	2161.82	3917.95	168.443	858.359	67.0636	47.4539	56.5012	61.9823	467.64	414.701	831.096	730.127
241	365.318	0.46415	205.736	6789.76	7232.89	6684.02	7492.24	13506.9	12764.5	11625.2	9806.58	8048.48	7851.4	7580.76	7237.68	18186.3	15796.8	19703.6	15219	8927.62	11202.4	8036.62	6809.02	18489.6	20229	19006.3	19865.1	8446.6	7402.8	7186.02	8664.42	36195.2	25843.2	28938.6	50445.4
242	365.511	0.46415	205.732	0	0	0	0	22.9379	20.6895	6.79553	4.91695	0	0	0	0	69.2382	33.0287	83.4027	35.258	0	0	0	0	20.3994	0	78.251	65.8288	0	0	0	0	295.228	117.18	115.736	449.1
243	366.372	0.46415	216.094	215.835	212.702	189.25	280.969	303.894	380.595	325.08	197.615	259.554	241.482	377.765	199.558	427.105	491.223	352.062	360.993	973.768	1932.27	257.458	219.949	1611.44	3094.54	484.54	969.336	311.298	272.779	276.631	339.424	573.222	709.392	840.249	491.768
244	366.856	0.46415	205.705	0	0	0	0	4.62892	1.87305	0	0	0	0	0	0	22.0794	9.61008	30.6456	8.34936	0	0	0	0	8.32419	4.85788	26.833	24.6993	0	0	0	0	118.136	47.0269	43.2245	183.854
245	381.315	0.46415	208.412	5544.98	6240.16	5648.68	6419.42	10789.7	9978.55	9890.39	8808.66	6567.84	6594.74	6109.14	6179.45	13098.3	12264.4	14984.6	11406.7	6629.12	7755.37	6526.63	5766.03	13435.2	14356.2	14599.6	16056.6	6983.87	6121.77	5908.76	6996.6	20834.8	20438.5	20212.5	29019.4
246	383.327	0.46415	206.885	9918.92	12158.4	11095.7	12454.1	14103.3	14151.9	13856.1	12617.4	12379.6	12549.8	11821	11856.2	16540.9	16012.3	18054.6	15916.7	11675.2	12232.3	12697.2	11204.4	15461	16218.9	18417.2	17479.5	12501.5	11751.7	11439	12893.6	26763.9	22017	23000.3	35473.4
247	397.312	0.46415	209.608	1571.2	1347.03	1215.95	1631.88	7224.44	7558.72	6988.88	5930.8	1624.66	1511.36	1360.83	1316.73	10782.5	6545.29	10082.4	7421.22	1568.45	1630.43	1478.81	1311.19	8168.14	7526.22	9122.85	10784.6	1668.24	1394.31	1428.54	1965.37	17187.1	9904.93	14417.4	28714.5
248	398.374	0.46415	216.938	124.983	105.016	96.1811	137.796	4151.32	3453.68	3251.85	3042.21	155.224	110.848	163.254	111.213	3610.86	4770.13	3839.79	3353.48	434.435	847.895	100.085	56.8509	3733.93	2670.61	3645.42	4741.3	106.271	122.038	107.863	140.958	1829.57	1479.18	2103.11	1721.65
249	399.325	0.46415	211.052	620.666	709.468	793.43	608.422	4858.72	3983.35	3641.19	3014.23	985.104	793.915	686.042	632.163	5957.39	4180.09	5304.07	4209.45	836.292	776.809	706.22	514.183	3384.92	2068.6	4914.38	4691.21	1579.51	965.485	1060.61	1278.1	9819.97	3831.89	7342	12957.4
250	413.3	0.46415	210.818	2836.82	2112.7	1914.03	2901.15	3949.14	3687.83	3351.7	2836.5	2356.07	2276.82	2116.22	2487.91	4969.67	4157.4	4817.26	4011.86	2072.75	2424.92	2887.74	2407.35	4055.82	4438.54	4920.48	4686.58	2495.87	2056.69	1901.02	2687.88	11146.7	6120.56	8599.73	18963.2
251	415.32	0.46415	213.725	2407.78	2186.02	1855.78	2300.8	5427.62	4602.76	4322.47	3672.3	2300.86	2364.54	2252.32	2150.77	6122.35	5064.98	5628.69	5015.93	2378.84	2786.75	2440.55	1933.1	4970.3	5423.73	5508.52	5619.47	2529.67	2145.49	2160.38	2647.45	11274.7	6353.41	9762.62	17068.7
252	418.336	0.46415	213.676	261.614	229.078	196.241	226.775	459.755	403.457	363.256	297.038	250.027	226.376	260.977	209.55	486.494	425.762	576.932	429.882	413.983	674.384	254.055	224.956	771.636	1454.92	539.96	591.592	232.435	206.912	235.515	261.196	1207.4	542.279	798.664	2748.03
253	419.317	0.46415	218.036	13401.8	13783.1	12154.7	13976.5	12691.5	13020.3	13683	12336.2	14179.8	14376.5	13074.3	13068.7	12519.4	13855.2	12998.1	13885.9	12554.6	13861.9	14068.4	14573.2	13343.9	14952.7	13212.8	13447.7	13815.1	12748.6	12090.7	14106	13433.1	14399.4	14992.3	14767.7
254	428.418	0.46415	225.096	101.764	36.9171	34.6065	39.8247	34.0963	27.6274	24.6851	27.114	42.0062	44.5735	63.6307	27.76	26.2347	43.1485	44.1338	29.3202	193.135	345.212	50.9985	23.9343	393.228	653.684	32.8649	116.844	46.5978	46.2247	37.5535	29.8963	15.3599	74.1376	90.3767	24.49
255	437.305	0.46415	220.648	277.919	246.101	235.548	216.911	291.743	312.441	282.944	227.101	248.37	250.755	266.205	262.254	337.231	346.159	367.722	353.244	296.96	435.223	314.384	195.889	438.588	683.262	370.518	364.825	261.324	219.854	197.712	283.627	751.799	431.624	701.41	1242.05
256	439.343	0.46415	222.057	9118.05	9964.23	8997.47	10259.2	9450.99	9588.35	10088.2	9088.27	10650.3	10483	9693.78	9517.12	9673.4	10240.2	9658.13	10213.8	9460.81	10789.1	10769.8	9146.36	10298	11238.3	9771.5	10016.7	10270.6	9604.5	9016.82	10325.8	10064.3	10420.9	11072.2	10671
257	440.418	0.46415	224.908	181.23	128.603	129.138	111.79	126.809	129.602	146.022	138.614	139.541	143.718	203.491	130.196	117.74	157.765	131.537	142.512	433.808	750.788	144.712	140.721	760.621	1470.06	150.358	272.153	151.385	144.471	132.755	154.171	91.7364	145.828	234.593	112.243
258	442.435	0.46415	227.729	115.797	32.24	25.1173	27.49	28.3748	34.485	34.03	35.8748	43.6396	30.6561	64.4541	26.8844	24.5763	46.199	38.7454	57.1326	152.605	321.093	23.9397	20.871	335.729	685.11	33.1692	126.967	34.8062	32.7093	24.7543	38.2652	20.1012	49.1967	63.1091	23.6603
259	456.446	0.46415	230.354	69.71	52.6207	36.5289	54.2174	53.3778	36.4583	54.9673	35.6407	55.1518	58.0881	62.2547	40.4852	40.1374	64.9428	47.1965	46.6932	193.348	346.107	72.8881	40.0979	358.945	615.36	49.0096	111.81	49.8913	45.8054	38.0453	51.4974	44.6289	67.9044	98.6976	37.9969
260	467.277	0.46415	224.521	672.492	562.607	509.176	658.311	594.74	546.67	561.395	487.595	662.569	665.805	557.702	620.245	689.345	723.431	773.145	731.026	507.692	536.924	755.009	516.953	691.411	620.361	885.465	901.547	658.261	625.652	571.799	835.164	2445.17	1508.96	2537.04	4302.26
261	469.295	0.46415	227.34	430.329	384.46	307.558	376.841	1311.83	1359.89	1146.93	884.355	349.132	361.942	325.588	394.84	2714.06	2161.47	3349.51	2334.77	349.65	293.969	416.541	296.57	1658.08	1145.12	3296.05	3021.54	640.496	361.501	380.849	633.346	10118.5	4516.52	6179.23	20234.4
262	485.289	0.46415	222.857	5969.7	4454.29	3801.98	4371.31	6650.07	3846.78	4673.47	3654.62	5996	4180.99	4259.26	4934.56	5913.88	4230.41	4499.78	6423.06	4739	3092.76	6273.02	3702.4	4047.07	3539.18	4774.11	5211.26	5453.19	4402.04	3326.4	3625.75	7922.57	6382.78	6570.09	12661.2
263	490.493	0.46415	247.923	81.4997	53.0587	57.3011	41.7661	49.2457	37.3056	30.8077	15.428	126.528	104.626	84.087	98.4509	75.3837	76.0137	81.1728	51.5647	60.1918	74.9441	89.537	34.2333	57.2603	85.5758	52.5985	53.8723	99.2456	78.0127	60.8268	75.5747	46.8249	67.9532	81.2482	63.1597
264	502.498	0.46415	247.763	559.84	523.062	467.991	304.947	495.588	430.715	335.494	247.078	1194.51	1166.02	946.445	874.975	788.14	719.607	792.221	568.641	554.817	399.485	658.611	248.782	425.119	529.849	404.818	488.716	831.224	614.268	519.875	641.438	428.708	484.682	503.806	604.056
265	516.454	0.46415	239.348	1764.11	2240.14	1939.28	1877.5	1889.07	2042	2203.74	2029.88	2171.32	2185	1977.21	1667.36	1837.19	2206.57	1844.51	2080.59	1705.08	2023.28	1663.49	1721.4	1771.09	1795.87	1949.45	1885.59	2111.34	2083.64	1970.19	2253.4	1522.97	1536.35	1822.11	1247.81
266	516.512	0.46415	248.947	57.3825	40.3362	34.7256	44.6079	43.8766	48.3674	34.839	39.6116	82.5119	95.4314	44.2802	53.4482	36.1672	52.5718	72.6647	44.1432	82.264	75.2766	79.8708	53.409	61.7891	93.6479	90.5351	86.6013	269.542	188.597	146.265	214.806	120.392	180.598	133.598	164.35
267	520.511	0.46415	252.962	13767.1	13964.2	12817	8570.18	13038.6	11514.5	9163.07	7208.03	21895.5	20106.2	19689.7	18429.6	15150.6	14239.5	17222.9	14198.2	11080.8	9276.39	14015.5	7331.07	8583.05	8571.76	9255.41	9591.56	13809	11459.8	10830.4	11712.8	7679.58	9089.36	8995.5	9710.52
268	523.248	0.46415	226.679	450.059	442.99	383.301	402.804	555.278	331.614	447.235	363.474	625.378	464.472	401.576	451.373	458.261	342.835	375.816	526.573	504.143	368.449	569.775	336.314	403.66	372.953	384.415	451.379	619.618	504.998	359.547	510.208	389.866	468.721	460.067	352.81
269	526.51	0.46415	248.825	247.112	180.695	177.303	207.441	194.079	160.698	211.243	175.854	98.4761	104.594	107.983	86.4458	177.194	260.931	207.507	204.529	168.868	278.09	112.901	69.6456	360.81	631.512	214.433	144.697	156.322	107.583	212.973	226.137	165.478	254.843	258.072	177.58
270	530.53	0.46415	254.188	829.895	758.639	716.108	390.548	890.553	713.737	492.173	368.092	2893.49	2591.62	1611.08	1498.35	1707.27	1561.67	2078.19	1087.26	2117.39	1464.72	2515.06	881.218	1713.97	1770.98	1703.11	2107.69	5372.16	3587.28	2705.24	4119.05	2433.07	3154.72	2726.79	3329.74
271	537.501	0.46415	255.45	12603.1	13629.7	11970	14077.3	12405	12971.6	13440.4	11543.7	14834	15189.6	13095.7	12899.8	13123.7	13779.5	12898	13685.4	11981.3	13648.3	15307.6	11629.3	12639.4	14026.1	12883	12716.5	14538.2	12459.8	11968.9	14032.3	12526.1	14610	14611	13514.5
272	540.535	0.46415	255.414	2733.41	2746.2	2481.75	2182.44	2208.63	2215.82	2220.51	1797.93	3283.82	2921.14	3186.63	3060.15	2501.92	2558.24	2581.21	2428.68	1983.4	2127.94	2505.07	1731.57	1904.51	2020.09	1895.03	2100.82	2598.92	1582.41	1449.35	1728.27	1944.84	1681.65	1879.94	2133.22
273	542.535	0.46415	255.391	207.185	177.85	145.643	148.953	145.106	150.1	146.673	124.56	220.326	169.706	187.468	194.638	150.45	177.919	158.303	170.089	160.965	231.719	199.318	113.568	201.771	288.023	126.547	156.673	189.452	122.507	112.538	141.183	130.184	151.28	139.729	133.867
274	543.344	0.46415	232.092	1340.21	1149.23	1005.07	1236.54	1251.31	908.282	1143.04	971.893	1335.8	982.331	897.171	970.009	954.865	836.605	758.174	1156.62	972.554	842.391	1170.52	870.022	814.913	869.691	837.689	947.925	1303.54	1048.06	857.086	1037.72	815.911	1078.26	986.174	660.127
275	546.525	0.46415	255.345	1150.12	988.861	791.79	803.231	977.651	850.416	750.2	507.486	7289.66	7120.62	2215.4	2079.26	2974.94	2804.3	4882.51	1565.45	7699.58	3490.49	7164.93	2371.06	4453.47	4377.16	5455.12	7937.74	20138.4	15471.8	13314.9	19001.5	10549.2	13448.5	10210.4	13293.2
276	548.543	0.46415	258.001	12653.6	12540.9	11907.1	5803.16	14557.4	11900	6850.01	4843.6	35099.3	32439.4	22315.7	22826.3	24061.9	23311.6	27755.4	14349.2	28132.9	18431	31249.8	14185.9	20607.4	19732.6	23549.1	25281	50052.8	37332.2	32582.3	41966	28561.5	34421.9	30166.7	35070.7
277	548.587	0.46415	259.335	28.623	10.3748	25.4637	11.674	109.983	21.8916	15.2248	19.5341	1672.83	1447.18	826.421	567.463	566.2	484.336	1162.3	175.74	1412.97	384.04	1237.33	198.175	436.2	333.185	515.344	1000.06	3262.67	2510.14	1432.38	2111.89	1027.22	1667.58	1533.14	1106.98
278	548.781	0.46415	260.664	80.7373	87.6389	80.0636	16.4201	108.421	47.1691	31.8321	0	653.506	611.903	270.413	252.692	283.373	262.313	390.656	153.632	467.856	182.807	550.61	116.833	225.64	193.857	323.591	430.295	1265.06	854.567	649.196	1030.97	473.526	692.881	569.661	586.635
279	560.503	0.46415	251.151	1945.98	1669.62	1539.72	1447.81	1573.06	1453.79	1403.97	1184.26	2712.21	2551.31	2126.45	2100.87	1888.3	2104.77	1928.72	1842.97	1649.09	1847.15	2076.5	1193.53	1656.81	2299	1490.2	1529.83	2179.48	1665.22	1545.23	1970.54	1477.36	1777.58	1841.93	1743.97
280	563.538	0.46415	261.826	2433.18	1364.19	1149.54	1407.9	1275.55	1364.69	1309.38	989.302	2300.78	2237.63	1704.71	1922.94	1612.42	1626.97	1899.27	1374.4	1559.28	1534.13	2891.32	1175.83	1505.7	1964.77	1377.74	1706.93	3220.07	2530.17	2000.55	3151.04	1839.05	2685.66	1877.67	2704.63
281	566.551	0.46415	261.793	2266.97	1819.76	1584.51	1712.94	1677.21	1814.71	1737.44	1379.4	2693.27	2609.01	2141.45	1942.06	2127.37	2259.26	2147.9	1873	2174.44	2084.88	3004.86	1705.77	2079.69	2280.41	2029.48	2107.61	3368.35	2523.56	2198.13	2853.37	2060.72	2541.31	2349.67	2170.28
282	568.563	0.46415	263.096	4563.21	4716.85	3875.26	4416.27	3995.68	4035.01	4341.62	3331.89	6477.94	6235.67	4875.59	4868.75	4568.82	5238.96	4652.2	4748.37	4504.71	4950.75	6004.98	3681.21	4251.61	5030.48	4408.58	4666.13	8175.13	3791.85	3494.27	4762.66	4593.99	4679.21	4977.2	5467.15
283	574.553	0.46415	263.032	382.277	250.691	249.913	289.805	235.595	235.603	242.499	183.266	621.383	660.269	359.199	359.415	388.124	430.261	535.985	316.701	548.03	457.797	543.124	256.68	554.965	790.377	429.901	606.12	1214.54	982.938	793.996	1248.28	671.317	986.349	750.58	881.593
284	576.572	0.46415	265.651	2093.9	1565.87	1596.83	1164.82	1985.96	1628.94	1348.35	942.846	3777.79	3643.44	2384.72	2381.89	2404.72	2871.95	2801.06	2085.61	2029.15	2098.64	2952.78	1331.84	1966.94	2311.19	2128.2	2210.49	4170.71	3131.27	2587.71	3422.24	2275.68	3695.3	2971.97	2688.97
285	579.596	0.46415	264.3	146.744	90.314	87.7534	98.5756	92.1134	102.061	96.2516	75.256	137.512	95.2164	99.725	100.503	95.6673	134.923	121.058	89.1541	115.256	200.341	170.104	111.233	153.288	242.342	90.76	131.828	155.989	111.286	125.964	129.171	109.79	175.828	135.344	111.732
286	586.518	0.46415	252.234	360.257	210.631	198.589	226.285	218.118	241.577	198.656	179.603	677.544	633.115	293.376	292.355	340.958	354.199	430.701	252.795	621.219	446.403	806.939	312.37	521.45	700.059	509.835	684.471	2188.73	1355.71	1090.91	1916.14	1022.9	1383.51	962.767	1395.52
287	588.534	0.46415	257.574	1454.56	1196.55	1030.52	865.185	1269.87	1092.38	823.91	637.593	4241.01	3859.52	2239.6	2151.45	2198.68	2254.88	2922.82	1554.1	2911.02	1836.34	3611.52	1356.05	1997.36	2221.11	2471.47	2849.26	7603.13	4841.98	3764.07	5972.95	3491.6	4520.86	3789.7	4707.76
288	591.564	0.46415	265.495	624.749	503.378	443.215	514.395	455.554	494.305	476.594	418.982	817.349	800.72	634.523	579.13	631.256	628.275	752.53	499.508	596.883	702.697	726.016	432.617	644.242	904.814	589.984	682.001	1145.92	880.17	740.102	1148.06	722.071	998.373	760.549	1110.9
289	596.595	0.46415	268.071	397.086	430.252	388.166	400.011	363.57	365.521	418.825	346.39	586.129	535.216	400.559	437.599	369.339	415.661	402.904	421.725	461.749	574.348	459.516	343.974	516.635	664.539	388.576	477.764	891.448	316.475	330.601	420.823	340.23	388.819	464.777	368.331
290	602.587	0.46415	268.011	566.39	406.208	445.293	397.958	413.303	378.589	407.513	308.487	1123.98	955.164	674.478	630.357	590.763	694.255	826.225	505.649	622.795	524.502	737.792	322.67	539.148	642.558	522.964	694.557	1116.38	928.899	899.693	1023.53	638.302	989.727	728.26	848.35
291	604.602	0.46415	271.909	3325.81	2863.79	2751.69	2334.4	2996.64	2617.33	2389.95	1872.3	5067.24	4661.25	3741.38	3563.64	3573.68	3840.2	4157.51	2942.81	2508.03	2606.45	3682.81	2030.27	2673.76	2968.89	2795.09	3071.11	4174.88	3169.73	2622.2	3534.78	2862.43	3532.96	3856.5	3492.87
292	607.461	0.46415	254.72	1029.11	455.035	413.835	713.006	468.405	423.474	481.803	391.079	504.498	458.017	418.987	681.362	416.264	502.989	431.388	467.812	480.846	506.239	767.684	1103.77	521.132	873.816	430.334	397.057	424.014	363.505	373.373	431.809	447.227	949.275	453.452	375.072
293	616.572	0.46415	265.251	254.041	152.49	161.491	163.015	144.919	187.923	157.003	113.157	282.084	275.701	224.53	250.467	208.816	218.698	235.501	199.1	204.017	260.691	296.603	137.28	269.326	379.846	192.531	240.246	328.828	218.725	233.578	352.331	203.317	313.028	285.501	268.964
294	618.603	0.46415	274.37	440.766	311.629	296.509	358.005	264.47	289.328	280.903	227.704	423.999	394.642	355.272	374.32	285.095	316.053	306.823	311.702	295.499	381.28	357.041	259.762	366.961	517.033	269.039	336.48	407.878	305.349	288.314	391.828	265.387	443.693	359.183	368.789
295	622.553	0.46415	267.82	278.973	236.513	197.504	195.577	183.212	199.719	219.917	155.681	346.81	366.15	284.01	343.86	235.386	268.424	276.987	211.722	259.992	298.287	404.194	259.539	269.89	432.969	257.99	275.252	348.218	246.841	234.076	290.666	219.061	305.041	250.095	266.379
296	622.6	0.46415	271.735	301.291	173.853	175.96	208.189	157.426	192.304	192.211	154.144	223.712	225.503	174.809	352.846	168.22	202.713	163.965	154.641	162.263	256.041	375.711	229.999	229.083	381.191	168.868	203.115	251.245	195.333	184.489	218.804	190.337	277.134	195.335	209.987
297	624.619	0.46415	274.313	1082.37	939.614	817.381	930.505	871.485	869.187	895.906	766.964	1206.31	1180.07	945.42	990.383	947.449	1064.52	1001.98	894.62	972.012	1032.82	1173.22	789.738	940.312	1074.38	942.812	970.737	1206.09	919.954	867.409	1013.39	932.985	1074.05	1068.37	985.198
298	628.603	0.46415	271.679	1302.46	1126.72	1129.39	851.713	966.325	899.322	1000.28	793.299	2447.56	2421.81	1720.78	1625.8	1576.64	1485.99	2073.34	1273.7	1509.61	945.154	1612.89	643.854	871.013	860.019	1096.98	1279.53	2027.97	1955.2	2019.76	2228.96	1303.78	1615.09	1514.12	1705.69
299	630.62	0.46415	274.257	5392.03	5405.58	5331.4	3477.21	4956.85	4322.55	4220.09	3036.19	10053	9783.46	7579.9	6919.14	6409.07	6149.86	7995.61	5360.75	5571.62	3574.55	6420.95	2707.94	3807.85	3115.76	4730.73	5259.19	8474.69	6836.12	6353.77	7003.36	4880.71	5792.28	5653.98	6740.53
300	633.636	0.46415	276.815	1294.54	1190.82	1189.32	913.185	999.153	958.283	950.642	695.706	1811.86	1728.14	1380.39	1365.27	1192.01	1241.08	1249.18	1039.02	940.243	1028.22	1304.66	733.046	966.181	1007.14	977.577	1055.81	1221.85	897.087	810.384	1030.18	834.064	1064.93	1170.67	1222.32
301	646.615	0.46415	272.817	681.965	405.413	395.128	469.384	373.434	371.551	398.824	352.55	573.056	535.076	451.551	561.095	427.794	505.431	451.886	436.54	426.722	517.363	662.212	382.888	514.159	622.487	427.134	572.602	668.794	606.469	597.705	737.238	369.719	731.592	543.737	448.512
302	650.622	0.46415	277.95	1974.41	1993.18	1784.33	1992.99	1968.54	1834.82	1891.17	1631.79	3271.94	3324.46	2197.45	2234.7	2383.46	2698.99	2652.34	2265.14	3116.38	2838.65	3473.07	2214.65	2840.8	2823.43	3215.98	3004.18	4105.2	3553.11	3534.57	3847.39	3559.71	3521.8	3704.39	3847.17
303	671.609	0.46415	275.193	911.857	740.958	695.712	691.061	643.603	666.787	661.051	589.965	1096.64	994.878	847.604	815.836	711.733	884.602	793.127	766.275	690.282	753.463	969.741	602.904	739.189	832.174	719.786	758.382	953.002	743.319	677.819	879.488	677.675	921.246	839.025	815.233
304	679.564	0.46415	267.336	679.646	635.251	492.125	607.803	520.846	583.188	677.769	549.275	712.109	710.916	628.891	664.234	630.082	758.095	648.264	664.174	569.297	648.343	733.461	529.419	564.335	773.922	614.058	627.509	719.016	551.795	516.471	706.467	506.117	823.812	664.069	618.006
305	683.607	0.46415	271.213	2803.92	5405.48	4667.02	3361.35	4657.79	4334.66	4132.47	3242.65	5903.23	4814.21	6134.61	4717.15	5517.18	5367.22	5167.96	4904.4	3288.72	3384.77	3852.43	2812.1	3005.35	2876.02	3327.39	2993.33	3254.67	3007.75	3235.95	3348.2	2564.85	3114.26	2933.61	2874.25
306	701.616	0.46415	267.169	33060.1	36577.7	32213	37660.5	32792.3	34447.2	36168.1	32157.7	38420.5	39212.6	35343.7	35447.8	34124	37586.8	34539	37255.1	32731.1	35316.7	40016.2	33385.4	33690.9	36988.9	35944	35292.9	37636.4	34251	32027.6	37116.1	34634.6	39005.2	39176.5	36121.1
307	723.594	0.46415	268.318	1033.57	784.07	669.587	915.942	697.222	713.608	787.094	635.383	1201.19	1122.55	925.967	897.239	856.06	1061.68	826.671	976.827	880.358	956.013	1205.14	824.488	770.364	915.451	927.2	896.911	1270.05	1055.03	917.398	1168.1	870.911	1192.02	1044.99	966.625
308	755.578	0.46415	302.329	0	0.342244	0.0560199	1.70302	0.891737	0	0.172324	1.14381	0.340681	0.0926887	1.80848	0.490012	1.37402	0.0268691	4.03714	0.260905	0.281302	0.389225	0.676971	0.109389	2.13778	38.6761	0.210748	4.28164	0.0140022	0.334112	0.000230781	0.542588	3.87039	210.345	1.67249	10.5411
309	824.845	0.46415	311.679	61.6125	50.1234	49.8468	47.9041	52.0484	49.2618	41.0599	41.3371	100.124	107.705	68.9939	92.336	73.2119	90.9261	72.793	69.1254	59.8798	55.062	81.1393	41.702	65.1522	65.7352	47.9749	58.8807	101.441	71.8406	85.4626	107.87	49.1999	89.7458	78.057	46.844
310	850.786	0.46415	315.163	8351.31	6785.51	6611.51	5749.24	7146.99	5890.16	5549.69	4128.04	17139.2	17288.2	10725.9	12139.1	10938.1	10663.2	13207	8002.82	6839.06	5189.44	12062.7	4782.45	5864.95	6933.6	8263.61	9072.15	16325.9	16140.8	11726.4	20941.7	8604.56	16451.3	9554.01	11893.7
311	855.732	0.46415	312.709	3557.21	3043.55	2609.26	3097.79	2707.41	2737.72	2962.55	2366.35	4462.93	4463.57	3401.42	3359.47	3397.6	3672.32	3493.79	3232.09	2622.88	2714.87	3857.83	2461.96	2523.08	2742.33	2996.21	3041.92	4364.41	3670.69	3065.96	4745.61	2932.25	4200.05	3640.19	3764.71
312	862.779	0.46415	316.302	632.23	467.67	343.013	555.766	368.887	348.305	454.99	347.226	576.412	611.217	447.304	511.363	442.968	480.843	506.52	443.849	372.244	396.785	608.172	358.757	357.955	405.934	408.939	436.375	649.103	556.297	429.317	599.379	365.348	641.363	473.01	557.566
313	864.794	0.46415	318.703	242.304	144.586	146.542	148.706	138.616	122.037	159.901	119.449	237.375	262.988	204.893	185.158	174.001	219.624	193.965	161.317	135.451	150.756	211.708	92.2316	113.111	115.877	147.363	183.459	304.698	227.391	174.344	270.795	146.478	208.046	189.337	208.386
314	876.801	0.46415	318.634	9895.92	7219.21	7949.8	7834.5	8585.92	6860.3	7529.9	6084	20321.4	19708.3	13028.3	12611.7	13783.7	12406.9	17370.6	8987.32	7694.65	5670.56	12879.2	5604.62	6648.37	7534.6	9293.57	10758.6	23102	20882.1	13145.1	23757.7	10571.9	15500.1	11256.6	15537.2
315	876.886	0.46415	319.837	163.639	121.351	163.7	134.059	166.444	104.121	132.08	123.412	375.216	179.461	207.959	140.32	215.584	350.577	205.179	141.323	135.996	141.663	175.339	126.026	93.6784	152.928	149.382	156.183	215.966	238.599	223.04	160.504	195.903	197.263	157.441	174.761
316	885.469	0.46415	277.703	137.027	124.274	90.7599	129.932	84.1966	106.831	131.549	88.4782	143.878	111.479	87.4288	111.997	110.895	149.226	108.255	103.82	82.6986	122.603	141.624	69.8118	65.677	97.7655	125.865	104.847	122.274	75.1904	65.7232	131.962	91.0006	130.952	170.041	137.383
317	899.493	0.46415	287.772	69.1823	59.208	34.0269	58.1796	33.0384	45.1853	56.4494	34.0846	55.2222	55.5917	39.4537	52.2531	43.3868	60.7188	50.9063	77.9519	25.0533	58.7094	78.7305	37.6353	48.1757	19.5607	47.6078	69.3835	47.8024	23.4364	44.5892	71.9086	27.2012	57.4614	61.5397	38.4316
318	902.813	0.46415	323.29	5329.96	3548.69	3794.15	4487.36	4022.29	3239.74	4099.96	3480.16	8090.66	7920.43	5836.06	5735.09	6044.23	5502.87	7419.02	4208.37	3306.71	2692.38	5203.53	2604.7	2831.29	3157.39	3941.31	4576.94	9094.71	7779.84	4668.9	8587.36	4348.54	5479.34	4599.62	6323.96
319	913.777	0.46415	324.426	365.521	224.538	188.377	303.012	174.91	197.15	264.155	195.75	352.305	343.292	269.926	281.185	245.783	304.296	284.414	229.939	222.582	212.964	362.979	280.211	196.939	261.623	253.824	250.9	424.644	343.899	239.682	418.259	225.879	373.187	328.399	349.298
320	928.826	0.46415	329.105	2298.76	1473.2	1381.17	1879.44	1565.4	1388.37	1484.42	1348.26	4110.28	4314.19	2788.45	2996.01	3053.71	3045.75	3962.76	1920.74	1961.88	1434.92	3836.33	1660.51	1517.83	2109.07	2253.34	2513.65	5426	4325.76	2250.9	4716.83	2403.47	3782.08	2631.17	3926.68
321	936.826	0.46415	329.064	364.758	232.61	177.205	312.43	171.022	210.556	228.127	203.554	392.394	388.915	304.832	321.562	283.335	310.348	275.916	255.663	205.942	276.948	388.876	389.297	220.544	217.087	254.124	226.338	492.956	298.26	237.491	427.007	239.372	386.357	321.123	371.403
322	954.839	0.46415	334.878	1158.13	736.92	612.413	1006.8	709.34	610.503	709.696	614.912	1417.7	1600.44	1120.88	1347.47	1135.93	1134.22	1434.34	829.624	753.909	612.154	1559.09	688.902	597.245	803.965	890.449	844.861	1618.24	1265.32	725.747	1382.34	755.178	1212.54	893.641	1224.23
323	981.857	0.46415	339.435	236.587	116.396	90.0615	204.845	92.9433	91.6772	129.789	112.538	298.489	275.238	212.012	241.137	201.281	213.251	280.703	152.632	102.081	87.4845	236.926	87.2994	83.7741	133.785	130.684	157.263	281.027	190.042	104.204	231.367	113.692	225.903	154.518	202.894
324	186.102	0.517733	158.387	6418.95	7293.95	6671.04	7467.28	6832.48	7167.1	7380.27	6541.67	7494.84	7486.13	7009.17	6959.06	7098.51	7394.77	6985.52	7249.53	6718.74	7377.04	7544.59	6707.28	7243.17	7592.39	7209.38	7244.54	7435.35	6937.48	6552.95	7411.45	7156.66	7516.44	7859.05	7628.18
325	194.008	0.517733	156.205	22.3579	5.99201	4.09751	14.4342	5.86064	5.46454	9.88359	3.24006	10.5755	11.4782	62.7138	10.0344	14.281	11.1374	6.55932	8.21498	120.468	256.797	19.7575	16.3437	218.918	360.548	8.11636	80.6757	10.6948	12.5851	4.495	10.508	26.643	36.4377	66.533	9.38408
326	198.185	0.517733	173.208	237.815	255.503	231.436	205.832	248.489	251.087	268.675	248.209	208.699	281.017	204.349	206.663	238.113	278.691	231.352	238.199	218.422	243.975	366.721	232.479	236.742	210.175	261.575	227.945	229.662	225.819	213.889	247.251	202.816	225.151	213.617	197.913
327	232.199	0.517733	174.952	146.91	123.828	113.193	125.807	140.228	136.376	148.372	134.125	148.292	134.145	144.43	136.013	165.3	164.796	143.221	155.757	215.349	279.819	156.353	116.945	327.319	355.323	141.312	177.947	157.696	141.893	124.786	141.317	155.749	158.639	184.924	178.899
328	242.189	0.517733	176.21	164.772	143.96	136.408	144.155	127.868	140.36	142.518	135.191	122.064	157.995	160.596	153.239	161.79	157.436	166.174	157.994	203.004	331.427	202.11	140.112	369.218	438.59	163.013	216.525	152.709	147.536	150.083	144.493	194.338	223.612	215.881	241.378
329	288.254	0.517733	193.865	3353.19	2942.31	2528.83	3007.77	2882.76	2913.24	2934.65	2751.21	2552.87	2508.26	2432.22	2286.46	2974.2	3282.16	3104.28	3079.67	2370.13	2578.52	2531.45	2215.61	3138.23	3078.37	2813.5	2384.86	2459.98	2334.32	2582.61	3069.59	2763.41	3294.26	3151.18	3208.75
330	298.255	0.517733	188.883	485.182	418.565	371.924	426.068	437.989	449.808	447.416	409.24	438.765	473.034	527.207	400.41	462.185	488.549	504.409	476.001	1044.99	1655.35	515.205	399.799	1964.59	2289.65	522.26	842.962	482.225	415.28	379.207	464.908	743.055	630.809	1217.57	868.727
331	307.226	0.517733	188.646	224.488	218.996	201.329	226.489	218.802	234.25	230.519	217.426	212.229	243.501	262.027	224.208	224.627	253.685	248.116	257.952	588.137	1067.96	247.209	214.68	1138.13	1902.12	245.029	474.665	231.063	212.817	180.531	215.97	350.362	317.149	470.242	504.987
332	329.208	0.517733	198.953	2132.97	1919.99	1856.97	2128.9	1927.62	1987.28	2054.8	1900.5	2119.05	2189.3	1935.6	2073.18	1995.23	2048.31	1989.16	2152.84	1973.89	2401.15	2035.67	1869.15	2390.61	3143.3	1979.27	2039.99	2086.96	1998.01	1883.13	2143.37	1861.17	2131.35	2313.91	1950.92
333	369.331	0.517733	205.656	1260.9	901.829	833.403	1078.86	819.907	855.862	857.886	770.566	966.346	921.015	948.138	914.578	997.118	932.644	998.198	962.259	864.987	1041.96	1040.42	912.846	1062.53	1590.4	945.21	1046.49	1001.29	757.145	771.289	853.615	1461.92	1207.46	1281.32	2431.34
334	398.34	0.517733	211.069	5630.04	5605.64	5089.12	6278.47	23747.5	20987.5	20519.3	18175.7	5963.91	5778.61	5386.82	5481.15	25051.3	21212.4	23383.2	20173.1	5544.12	6077.41	5773.24	5175.96	21141.8	21091.3	20750.7	25388.1	5894.19	5314.48	5155.41	6098.22	23396.8	20744.3	21843.6	34929.9
335	429.304	0.517733	212.039	1245.76	1133.77	1083.48	1220.26	1473.65	1403.16	1342.29	1388.41	1208.09	1184.66	1288.16	1102.15	1687.82	1571.79	1724.91	1551.74	1525.78	2061.29	1255.86	1072.03	2423.17	2997.3	1924.02	2002.07	1331.52	1125.3	1101.48	1426.64	3900.02	2422.8	3603.88	6434.61
336	431.315	0.517733	213.474	2094.68	1898.08	1616.92	1977.62	2766.35	2773.02	2618.33	2148.96	2063.32	1949.73	1861.4	1825.85	3884.47	3441.37	4060.36	3279.26	2292.9	3030.92	2097.78	1691.43	4022.13	5499.72	4179.57	4126.58	2051.55	1781.76	1770.2	2105.24	8431.03	5108.95	5893.16	15407.8
337	446.309	0.517733	216.171	830.591	797.372	673.124	723.209	939.514	919.096	897.286	743.42	816.53	836.875	743.833	793.146	1033.61	893.662	1003.21	963.254	765.596	919.291	881.392	668.131	1050.42	1227.19	1015.84	960.316	848.874	733.076	642.811	845.632	2011.8	1200.64	1899.43	3299.63
338	455.326	0.517733	223.257	1436.21	1320.29	1176.6	1368.29	1704.48	1569.87	1660.96	1462.09	1489.79	1481.56	1355.99	1241.65	1656.74	1790.72	1846.12	1834.37	1413.76	1579.13	1451.48	1277.53	1900.94	2305.8	1706.8	1831.91	1527.81	1346.44	1165.35	1436.84	3063.15	2152.61	3288.43	5188.98
339	509.267	0.517733	213.93	1390.67	1259.71	1026.7	1304.63	994.118	1046.92	1153.55	973.394	1303.39	1260.38	1084.38	1215.01	1033.96	1195.66	983.028	1220.45	1098.79	1094.72	1387.03	1036.15	1028.11	1205.13	1038.61	1133.59	1276.51	1092.48	917.21	1285.56	902.845	1263.28	1254.02	971.894
340	510.442	0.517733	240.802	750.602	652.661	545.763	649.541	599.505	602.317	659.393	603.285	733.367	696.538	662.912	588.952	574.528	714.287	585.787	638.055	720.351	989.249	675.675	573.434	934.317	1412.55	611.03	733.314	682.733	589.586	581.061	721.832	554.144	663.263	730.134	549.827
341	511.344	0.517733	225.395	412.173	392.17	309.405	397.013	323.081	366.24	362.265	354.384	390.867	353.988	370.089	372.55	321.491	351.736	371.4	390.981	360.172	376.848	422.296	337.445	376.48	378.607	354.165	369.421	370.568	359.012	343.411	370.051	338.489	389.52	394.346	348.913
342	593.586	0.517733	265.474	1560.08	1063.31	939.623	1170.87	1058.62	1273.56	1125.16	876.875	1349.91	1347.81	1085.67	1091.4	1122.75	1274.42	1133.21	1157.59	1100.43	1287.72	1819.98	1036.94	1373.42	1457.51	1067.47	1126.5	1487.09	1156.52	1029.54	1381.89	1078.05	1362.82	1400.22	1330.25
343	681.409	0.517733	248.742	841.197	787.681	676.915	886.064	616.227	681.647	768.848	647.259	822.664	814.361	692.054	753.885	735.165	768.166	713.254	773.177	638.15	766.395	821.293	680.581	659.761	660.002	742.303	699.732	835.603	729.41	607.724	862.198	673.598	832.601	810.673	777.954
344	740.684	0.517733	291.221	469.636	404.397	361.008	465.54	384.936	415.305	415.155	398.526	469.106	454.229	424.987	356.044	437.927	425.693	391.718	437.401	345.778	397.043	452.353	389.741	421.391	383.191	416.689	388.069	452.27	454.902	394.875	414.119	403.565	427.689	492.724	412.518
345	799.548	0.517733	290.83	1117.72	843.15	628.627	944.823	693.659	709.96	810.363	669.958	849.584	825.691	782.565	843.328	774.306	847.534	720.896	843.952	663.727	809.054	930.214	849.086	725.082	887.873	770.967	778.046	904.991	684.535	617.188	833.236	692.683	965.021	953.498	880.264
346	833.596	0.517733	291.881	855.725	849.416	675.133	777.757	699.849	738.222	796.77	707.278	903.825	874.655	807.304	718.167	797.251	886.773	704.938	779.084	651.646	764.342	974.469	628.399	624.675	862.23	728.236	733.051	816.468	717.361	610.225	841.832	647.033	990.152	827.25	821.661
347	839.485	0.517733	272.802	301.094	276.32	166.971	250.466	163.488	207.407	254.676	177.9	230.577	229.353	242.351	250.095	229.219	244.338	242.505	290.215	191.378	209.927	249.363	182.173	191.856	218.302	229.09	189.381	233.196	206.895	177.325	211.544	230.906	230.318	284.17	246.319
348	849.494	0.517733	277.883	113.275	146.806	92.2614	147.249	102.899	89.428	130.548	89.5161	129.882	145.952	84.6255	105.414	83.7802	109.15	96.2415	117.709	82.9661	110.498	138.222	93.4267	77.3865	113.603	115.647	99.2651	133.2	131.088	92.4142	121.566	111.819	117.432	134.133	101.225
349	854.487	0.517733	277.857	194.248	207.412	157.123	180.421	148.145	180.32	193.944	146.857	187.725	197.938	165.018	177.821	171.499	195.775	158.487	164.991	140.655	163.431	207.609	167.819	147.996	124.525	177.65	176.269	198.24	149.348	143.486	183.042	149.53	180.374	196.221	158.59
350	867.504	0.517733	277.791	241.049	225.569	168.377	178.522	140.45	169.811	202.226	176.231	242.995	213.424	190.381	154.275	165.719	207.659	195.215	199.888	136.191	182.678	181.086	144.172	158.661	202.996	153.572	146.407	251.221	141.115	156.984	261.874	167.259	218.853	212.862	191.627
351	877.498	0.517733	276.463	123.164	148.736	105.218	138.637	81.8129	123.362	134.166	98.9471	139.888	131.751	107.658	103.421	124.327	153.699	116.086	112.225	98.1776	106.34	120.862	70.8978	105.711	91.9075	126.918	110.669	150.114	143.095	75.0265	170.487	92.4783	126.083	124.145	96.8334
352	877.574	0.517733	285.361	160.053	162.695	126.64	174.661	109.09	116.032	166.953	122.825	161.497	150.101	136.084	137.794	124.183	170.008	126.242	137.026	106.089	149.79	147.092	113.303	139.24	177.446	152.004	114.613	158.523	167.28	91.2719	155.302	92.8015	131.853	144.631	142.419
353	878.901	0.517733	321.026	128.618	124.142	86.7118	80.7509	103.914	91.7547	113.003	63.276	167.834	150.62	133.653	102.734	114.067	182.997	131.964	98.8793	85.0686	107.912	156.235	71.4661	109.821	113.604	123.407	103.316	135.018	178.103	174.324	157.664	118.146	160.242	125.886	127.153
354	919.632	0.517733	308.716	122.555	120.045	59.7423	108.546	78.9594	78.5448	95.5763	67.9602	103.972	112.744	81.1819	107.334	104.67	114.891	101.492	65.9317	73.4463	132.895	108.149	96.0677	87.415	134.058	110.92	90.6862	123.738	74.638	52.5396	106.187	202.02	150.844	111.08	1108.63
355	297.047	0.55155	172.884	270.847	139.069	120.105	155.792	146.151	134.416	202.993	136.244	219.31	184.758	134.366	173.845	240.619	150.279	118.188	127.092	225.273	219.604	245.957	212.293	154.479	170.716	132.552	154.126	147.506	185.722	135.399	143.044	166.786	220.765	158.272	92.1073
356	387.313	0.55155	214.212	538.963	441.209	401.586	457.637	536.479	497.997	516.766	457.61	822.55	836.251	762.737	780.981	514.696	613.069	565.713	510.127	930.179	999.504	849.277	623.097	826.197	1481.66	569.926	892.089	946.373	774.15	455.288	449.486	817.239	723.862	911.148	1157.14
357	554.532	0.55155	257.933	671.078	532.197	471.631	606.532	533.297	470.223	545.534	536.128	458.091	409.089	361.578	337.884	473.116	662.011	579.281	592.193	379.927	556.439	430.444	311.538	658.768	1035.58	528.036	376.146	416.535	372.606	555.41	620.427	454.152	756.618	674.419	529.849
358	581.547	0.55155	261.634	2051.48	1730.99	1500.05	1904.48	1677.74	1632.87	1765.68	1509.38	1765.57	1814.46	1539.81	1605.83	1689.43	1909.8	1777.54	1865.53	1549.66	1737.91	1859.55	1483.84	1787.44	2105.82	1813.48	1718.14	1847.31	1501.73	1590.48	2008.5	1639.87	2021.34	2086.84	1873.43
359	679.436	0.55155	269.945	261.233	306.275	254.56	276.178	193.833	296.891	291.751	297.025	307.516	255.696	304.628	278.66	296.557	310.051	318.55	286.546	312.992	268.994	276.223	210.696	245.997	225.76	250.883	318.196	267.658	252.334	244.719	308.797	241.921	271.869	337.135	319.233
360	694.668	0.55155	286.52	632.313	547.957	470.842	601.27	480.404	537.781	578.526	450.78	615.564	594.967	504.512	497.413	525.593	596.638	479.601	526.673	491.405	605.719	600.292	486.954	541.856	608.645	536.93	549.706	623.929	532.449	469.479	619.332	507.18	588.783	650.407	558.225
361	711.419	0.55155	253.898	1067.93	1073.2	884.345	1113.48	896.653	953.509	1061.94	927.442	1095.42	1092.12	1007.95	1021.79	963.835	1093.19	913.262	1028.26	907.221	955.15	1136.09	889.968	897.236	988.829	952.45	939.996	1048.6	904.568	840.074	1106.72	911.24	1012.36	1091.04	991.906
362	817.459	0.55155	272.921	298.621	211.914	188.266	251.207	201.938	215.369	275.311	208.317	274.63	236.656	200.03	220.819	227.919	286.963	241.866	270.324	189.541	228.379	271.808	232.053	182.444	257.37	245.101	213.199	312.661	216.425	184.729	273.631	230.856	273.684	298.074	277.648
363	881.826	0.55155	323.406	997.264	675.337	608.261	831.726	724.624	700.966	652.343	528.445	1283.62	1299.41	846.112	1054.26	860.863	1072.49	1009.35	817.351	585.706	641.112	1318.65	681.926	703.82	920.951	853.957	864.005	1270.98	945.49	647.11	1311.77	722.9	1477.92	1314.4	1091.69
364	223.977	0.585367	147.817	17065.9	12062	7231.1	13757.3	8114.97	10220.7	11869.8	7410.97	13897.2	14963.7	9911.71	8809.69	10323.6	12315	9409.94	12091.4	7824.01	11478.8	15826.5	7734.94	8849.47	11155.2	10156.6	10227.4	13310	9199.33	7165.66	12228	9731.25	14273.9	15930.7	12336.8
365	250.987	0.585367	146.93	6528.81	4246.38	2709.62	4482.83	2960.7	3705.05	4133.39	2747.43	4506.35	5036.25	3548.4	3347.72	3795.23	4260.88	3410.37	4188.73	2954.64	4113.54	5481.9	2878.18	3276.19	4004.57	3676.74	3680.09	4294.99	3355.24	2686.95	4185.38	3557.11	4639.22	5716.62	4067.52
366	251.983	0.585367	146.901	5272.36	4458.9	3094.03	4670.76	2988.02	3656.67	4065.06	2863.35	4683.14	4850.43	3555.97	3129.33	4155.35	4115.64	3332.78	4268.5	2815.12	3970.43	4985.06	2596.05	2942.32	3539.81	3421.27	3651.22	4934.13	3358.92	3110.56	4312.1	3738.95	4951.31	4880.05	4157.08
367	265.003	0.585367	146.539	2039.47	1570.79	1072.63	1690.47	1067.48	1327.58	1483.61	1032.06	1672.69	1683.7	1261.64	1192.35	1518.96	1521.57	1199.13	1483.23	994.105	1423.3	1875.82	976.336	1075.22	1363.95	1272.08	1345.58	1725.05	1225.2	1114.75	1544.15	1383.58	1845.87	1731.62	1497.54
368	265.016	0.585367	168.822	119.707	64.4549	62.4437	95.4269	53.9849	57.0705	72.6301	67.4085	84.1549	63.4309	46.3619	86.5251	85.6728	69.5655	56.0164	55.3145	97.2463	78.3008	102.141	99.8502	68.8127	86.6654	59.3593	52.327	62.9012	76.9543	59.0823	62.8559	70.3598	125.587	73.8384	49.8
369	279.018	0.585367	146.187	498.141	365.714	246.344	378.953	242.94	317.428	361.519	232.746	391.898	416.922	312.548	260.527	365.508	375.242	283.58	357.208	243.321	317.849	455.799	237.652	255.741	311.655	301.55	312.765	423.129	295.1	278.711	380.76	334.044	434.812	405.815	381.698
370	359.109	0.585367	202.853	2776.33	2479.46	2289.42	2425.59	2208.58	2295.38	2387.11	2276.9	2282.2	2301.02	2393.34	2245.08	2356.09	2375.84	2127.55	2447.99	2219.43	2213.98	2355.26	2197.36	2174.89	2275.6	2172.22	2244.92	2383.28	2334.39	2128.69	2535.54	2150.55	2307.89	2256.03	2221.04
371	403.112	0.585367	209.509	3651.48	3723.12	3630.26	3504.42	3631.08	3725.06	3759.58	3740.98	3375.6	3246.68	3755.87	3688.9	3426.04	3433.51	3571.27	3661.47	3415.86	3519.64	3140.44	3516.73	3466.91	3629.9	3493.79	3534.72	3397.39	3590.58	3385.6	3476.12	3273.24	3331.94	3196.44	3124.74
372	461.363	0.585367	223.173	929.987	834.936	737.042	869.14	842.034	803.051	787.694	755.286	879.195	925.835	857.539	810.446	810.542	878.102	785.593	815.107	986.468	1451.36	868.516	711.416	1448.29	2399.94	882.103	973.596	862.726	784.668	684.094	842.924	988.629	939.825	1113.51	1420.96
373	497.276	0.585367	222.711	2871.42	2747.28	2234.84	2812.03	2345.39	2410.09	2747.83	2334.16	2834.78	2798.37	2595.78	2581.68	2407.5	2665.3	2447.81	2680.09	2464.84	2677.96	2968.41	2361.86	2489.56	2643	2493.38	2502.02	2804.24	2523.82	2235.8	2812.05	2445.76	2729.52	2890.82	2651.34
374	540.375	0.585367	216.501	34180.7	39755.6	36049.9	41120.5	36428.6	38347	39806.5	35857	40779.7	41519.9	38499	37436	38575.8	39380.3	38163.6	39939	35660.2	39609.4	41449.7	35444.1	36572.1	38784.2	37830.5	38603.6	39853.1	37205.8	35452.8	40238.8	36940	41320.2	41573.1	38324.6
375	542.288	0.585367	219.358	236.318	168.852	171.035	201.793	171.315	184.889	215.04	177.176	209.187	208.593	205.568	193.798	213.721	213.114	201.585	185.615	169.611	197.717	203.505	196.182	207.601	181.969	214.428	188.037	244.698	186.154	168.417	258.263	182.984	201.536	239.695	210.451
376	595.174	0.585367	262.82	142.601	100.123	54.5619	148.227	49.7825	94.8147	96.1998	43.1491	129.277	153.599	70.1503	53.6848	89.9886	110.127	67.3722	87.8874	46.0438	106.34	146.934	54.0514	56.4075	126.632	74.8401	83.2051	131.469	72.2828	51.4735	113.102	67.3989	154.22	173.463	99.0215
377	691.304	0.585367	291.599	198.887	225.883	202.399	260.074	205.415	194.606	230.238	189.01	224.079	263.489	180.118	161.925	251.679	254.456	154.27	242.485	174.946	200.917	202.432	158.31	191.775	206.72	200.599	173.887	288.676	231.764	253.147	268.221	247.608	292.613	234.21	252.481
378	705.319	0.585367	293.997	247.17	257.242	213.075	254.904	229.144	245.851	222.017	228.441	249.311	238.064	194.951	162.523	233.372	238.419	159.91	243.225	199.619	220.699	248.762	151.907	190.123	213.562	235.43	176.733	279.718	189.793	244.347	244.878	249.375	287.04	230.672	246.989
379	707.281	0.585367	292.728	463.643	484.996	421.993	482.803	445.533	448.141	512.318	431.21	424.221	411.182	506.169	432.352	426.221	513.271	396.329	498.724	386.099	434.603	415.894	389.348	384.878	444.765	399.479	367.556	439.947	453.949	384.066	459.933	445.22	425.578	454.651	424.725
380	712.544	0.585367	273.586	209.275	335.457	309.814	196.106	268.098	314.517	263.094	245.558	438.235	377.823	431.63	202.332	499.811	320.789	487.768	349.135	347.9	330.194	203.872	168.519	340.985	212.268	346.429	339.753	446.992	338.327	301.136	444.878	254.439	230.091	352.374	413.266
381	719.335	0.585367	293.888	98.6148	87.0625	72.6168	81.5866	69.799	61.0213	87.9062	83.274	67.8785	73.238	78.8674	48.8801	90.3545	94.7834	40.1606	69.7206	81.272	52.4077	94.843	47.2866	64.8206	68.162	62.1477	53.3424	98.8901	71.4936	79.001	103.522	74.2465	101.99	67.9516	76.874
382	721.296	0.585367	295.124	194.58	243.079	225.727	212.518	201.258	206.186	214.96	178.54	200.084	211.345	187.532	167.799	226.772	220.141	190.346	233.577	204.03	181.167	199.086	174.618	178.315	165.695	203.507	191.337	247.383	244.097	221.081	263.204	249.717	214.948	196.923	201.891
383	735.31	0.585367	297.514	77.1529	100.952	76.3387	81.2014	99.5557	89.3349	86.4794	72.8792	77.5719	81.5064	75.9196	56.4331	75.3883	90.1866	94.3398	110.323	77.2849	63.4724	85.4956	63.941	75.4786	77.5532	68.5257	61.8361	89.4503	106.973	77.7003	107.031	103.916	95.78	75.1414	69.8237
384	877.55	0.585367	291.644	69.3739	87.309	60.3496	93.3078	71.4545	70.0504	78.0814	65.1845	79.642	81.8479	75.8267	67.054	79.0137	79.5046	63.7093	82.3968	56.66	74.7583	81.5382	49.6524	47.6466	65.7644	87.1112	80.3513	79.3278	73.5835	63.1791	103.379	68.5585	91.6231	97.6115	100.224
385	960.766	0.585367	325.382	1265.27	1155.92	936.075	1348.01	1031.94	1023.74	1304.65	993.602	1375.17	1336.93	1150.05	1081.3	1191.24	1375.42	1058.79	1147.78	974.023	1149.54	1315.66	1035.43	1080.05	1179.41	1140.98	1158.88	1431.69	1142.87	985.865	1301.39	1139.8	1338.66	1406.43	1257.15
386	382.239	0.619183	199.386	1014.86	972.976	863.457	1073.82	912.847	908.671	937.1	868.128	943.522	984.07	946.036	1015.94	795.41	865.564	792.223	895.919	987.13	1145.47	1185.55	1033.31	987.049	1506.53	877.547	869.712	920.129	897.312	811.443	937.083	840.215	1045.45	928.603	759.73
387	407.337	0.619183	210.915	1164.97	1088.21	975.993	1108.55	927.189	958.876	987.881	1077.72	1192.17	1161.74	1253.16	1062.88	903.91	1076.51	878.613	1013	2038.04	3189.52	1250.53	934.224	3152.45	4712.7	1009.56	1471.24	1249.2	1136.99	968.131	1230.64	861.013	1262.84	1417.71	930.365
388	424.361	0.619183	215.043	643.12	561.768	523.064	566.036	565.809	538.475	563.334	632.08	586.964	595.166	618.429	531.863	557.328	599.616	519.003	577.902	783.824	1387.27	581.455	525.124	1260.46	1755.62	529.793	745.453	558.289	570.818	493.36	618.175	547.517	591.35	748.976	602.562
389	671.42	0.619183	252.847	1837.75	1789.76	1474.87	1844.54	1528.87	1707.35	1869.59	1544.04	1831.28	1842.47	1673.73	1696.09	1742.85	1854.86	1709.25	1768.05	1570.7	1798.3	1898.11	1587.83	1707.99	1852.49	1690.46	1730.33	1977.32	1633.56	1564.1	1808.99	1710.89	1877.37	1968.2	1945.37
390	718.694	0.619183	293.893	557.309	551.453	446.821	540.577	460.421	491.81	547.757	458.363	542.954	581.644	513.499	513.759	495.647	574.23	509.05	516.652	501.728	544.554	589.406	433.397	450.666	541.519	539.459	527.913	541.803	469.453	412.48	585.058	477.767	571.75	604.568	540.585
391	767.431	0.619183	256.207	707.242	654.593	506.755	647.293	540.821	560.731	693.652	507.896	655.789	654.199	577.418	600.475	631.453	571.508	584.835	632.715	516.325	631.072	651.454	542.509	553.64	568.165	593.023	629.547	703.693	542.989	533.282	651.31	534.262	615.676	691.352	651.436
392	820.449	0.619183	263.815	404.456	401.014	261.509	369.318	274.85	283.86	406.148	276.384	360.415	361.571	305.934	309.106	338.862	372.783	318.089	335.91	259.647	300.613	359.599	348.297	256.733	242.426	300.272	295.591	387.271	297.328	292.917	404.632	288.875	376.977	370.615	359.136
393	841.627	0.619183	298.065	1578.33	1260.92	960.065	1304.02	932.253	1099.41	1307.12	939.15	1328	1455.15	1102.66	1134.48	1235.02	1283.58	1151.47	1241.25	956.057	1220.28	1434.33	970.055	1044.42	1262.73	1161.19	1198.77	1382.24	1054.5	930.395	1387.57	1127.12	1362.94	1426.17	1373.04
394	942.672	0.619183	311.038	158.441	153.013	94.162	144.954	111.929	129.228	113.638	89.3579	165.144	170.306	118.721	107.484	122.366	149.588	99.788	133.946	110.739	135.517	138.624	99.303	127.787	126.411	112.357	119.065	171.324	144.919	109.527	136.36	123.171	143.45	133.461	174.131
395	186.064	0.672767	156.625	101.198	109.89	74.109	126.222	94.2819	102.812	112.954	81.3245	119.183	105.119	89.7174	124.244	104.937	94.1802	111.295	106.88	89.3364	120.895	96.8557	104.657	106.558	103.887	114.769	100.864	103.993	76.3245	73.1783	99.6528	116.438	106.341	119.654	143.07
396	367.265	0.672767	198.143	310.747	340.015	329.78	331.271	281.842	292.187	327.078	268.092	359.127	291.823	286.339	272.573	349.361	319.762	290.837	347.874	318.211	367.629	282.025	293.044	362.6	409.186	323.464	384.523	356.008	318.362	277.692	336.138	354.039	332.168	406.143	525.695
397	443.209	0.672767	207.414	337.007	349.466	291.013	349.329	290.594	285.697	311.348	297.169	326.113	345.351	280.63	269.538	275.426	322.069	306.435	327.446	299.081	299.384	339.884	300.365	338.045	328.699	296.325	342.84	350.464	302.523	293.929	346.175	304.07	318.798	344.921	312.408
398	486.358	0.672767	225.696	3317.85	2985.14	2600.57	3200.32	2920.03	2878.97	3079	2924.07	3354.57	3099.69	2845.08	2829.05	2968.56	3205.19	2827.52	3158.62	2771	3064.46	3349.45	2740.84	3056.03	3215	2928.9	3013.28	3258.95	2889.47	2661.5	3099.24	3142.03	3402.04	3534.06	3764.92
399	491.366	0.672767	228.468	363.916	329.607	300.156	351.211	316.819	288.177	349.24	296.893	347.942	372.218	323.647	305.886	309.712	344.79	328.039	350.263	346.507	381.112	344.235	271.579	366.536	365.379	345.192	337.589	385.375	314.838	323.964	369.384	317.858	349.444	427.33	378.648
400	502.498	0.672767	247.763	409.302	445.2	385.552	262.13	378.562	292.681	281.042	227.241	544.321	370.188	570.422	533.32	487.959	401.842	434.542	392.017	194.655	212.43	278.68	165.343	199.667	183.39	207.607	160.239	162.737	146.866	187.119	175.455	119.57	153.775	144.026	201.298
401	596.374	0.672767	235.758	633.312	649.198	578.494	621.657	563.471	596.661	635.077	538.81	683.222	669.401	589.647	598.277	559.295	656.149	568.782	653.275	541.955	652.586	656.253	516.603	566.335	612.959	611.982	635.341	649.494	579.187	542.015	652.529	590.518	641.042	686.572	668.414
402	618.6	0.672767	269.165	144.364	147.241	120.918	118.907	112.351	114.962	138.695	98.0425	139.261	138.429	127.486	107.722	117.674	136.033	102.281	103.982	93.9596	132.905	147.529	73.95	109.025	160.47	134.484	116.386	151.538	130.071	84.4586	149.509	118.624	147.154	145.898	110.722
403	656.541	0.672767	275.32	678.273	712.631	619.626	745.108	640.607	680.52	711.625	632.03	783.197	748.095	690.824	651.294	676.201	790.04	630.739	694.395	606.769	658.576	715.295	604.277	640.428	698.482	709.538	693.825	750.16	642.182	570.841	752.624	667.791	752.785	749.53	798.763
404	681.398	0.672767	240.595	723.909	683.861	598.301	762.547	633.53	661.599	730.343	651.474	814.742	793.582	682.87	683.237	719.549	760.91	701.75	778.217	654.106	730.198	790.26	604.576	691.63	757.219	719.181	687.725	815.151	690.122	606.003	797.854	731.094	774.169	791.055	766.249
405	682.564	0.672767	275.105	14932.5	16826.6	14953.6	10639.8	14788.1	13379.9	11794.2	9362.69	18907.1	14274.1	20327.3	19626.2	18668.8	16825.9	16999.6	14889.4	8321.5	8759.32	11343.5	7144.84	7998.38	7516.42	8184.6	7426.56	7301.47	6875.52	7635.76	7145.13	6162.71	6960.23	6330.88	7765.86
406	708.578	0.672767	278.764	531.054	587.552	479.462	535.361	493.571	514.869	527.288	435.927	1197.36	1225.92	657.809	632.811	871.442	826.65	910.309	671.977	954.731	793.977	1068.92	573.675	798.338	810.9	928.886	1017.91	1422.56	1547.41	1538.17	2080.72	909.472	1314.55	899.608	1297.67
407	708.709	0.672767	291.46	1939.17	2442.1	2114.23	2473.74	2182.99	2196.61	2340.82	2083.13	2524.07	2557.14	2236.27	2320.2	2114.58	2481.5	2200.42	2382.91	2142.39	2294.2	2556.84	2081.37	2236.32	2467.38	2379.23	2383.28	2428.11	2180.1	1960.26	2475.9	2248.97	2514.39	2588.28	2247.6
408	710.595	0.672767	281.308	8947.58	9726.57	8620.99	4450.42	11224.6	8968.11	5673.61	4047.87	17442.2	12902.3	16201.3	16032.9	17377	16251.2	18047.1	10834.8	13207.1	12289.8	16025.2	8649.24	11477.4	9965.84	11040.4	9653.06	14740.9	11320	13080.1	13189	9672.31	13054.8	10144.4	12504
409	716.591	0.672767	278.704	249.392	234.821	172.567	233.395	198.468	205.928	247.408	209.587	264.772	266.724	231.294	212.948	208.682	244.341	194.791	229.997	217.807	202.792	253.681	202.573	207.267	235.114	228.803	217.247	258.001	203.756	198.373	226.828	230.945	228.984	261.238	257.633
410	723.561	0.672767	277.371	2503.3	2440.26	2291.16	1867.84	2279.87	2003.57	1892.31	1551.08	2799.14	2343.81	2767.45	2563.26	2661.83	2509.54	2337.21	2420.89	1495.18	1589.55	1978.64	1295.3	1531.34	1352.47	1460.96	1351.47	1617.27	1377.97	1464.6	1426.85	1324.16	1400.08	1415.1	1595.1
411	728.601	0.672767	283.724	2030.55	2242.49	1828.66	1684.04	2090.25	2059.88	1806.38	1563.79	2820.34	2481.51	2826.8	2628.68	2857.3	2804.42	2978.3	2192.3	2338.86	2390.6	2708.4	1752.49	2265.78	2061.17	2259.71	2124.37	2664.22	2228.87	2317.05	2585.94	2074.12	2421.98	2255.68	2358.16
412	738.532	0.672767	278.549	4896.27	4971.12	4400.03	4370.04	4644.86	4483.63	4433.58	3603.01	5058.47	4688.38	5378.7	5640.23	5208.52	5191.81	4899.67	4955.89	3534.04	3987.65	4528.22	3465.8	3766.93	3967.19	3907.93	3774.57	4127.32	3480.54	3405.29	3926.66	3617.5	4070.12	3927.11	3970.63
413	738.624	0.672767	287.455	1849.89	1803.92	1854.23	1365.27	2043.93	1775.05	1564.68	1306.8	1852.21	1613.71	2188.94	1997.98	2044.54	2278.9	1880.88	1860.33	1110.77	1351.11	1460.44	1057.96	1265.94	1237.9	1252.6	1170.35	1201.26	1045.58	1083.85	1135.88	1052.93	1250.62	1180.61	1243.15
414	740.66	0.672767	288.703	1194.08	1107.35	973.56	1026.28	1010.29	1023.79	1093.55	962.596	1143.69	1072.34	1049.17	1089	1139.16	1187.7	1072.33	1111.68	916.658	1066.67	1136.94	952.443	1003.93	1075.35	1028.69	1019.81	1139.91	936.891	978.936	1043.12	976.413	1045.03	1161.81	1073.72
415	750.586	0.672767	283.57	3269.41	3468.15	2864.82	1861.52	3683.43	3037.84	2082.5	1597.31	5895.07	4446.66	5201.1	5095.17	5998.53	5724.8	5698.84	3837.42	4126.97	3958.42	5371.31	2797.62	3595.48	3280.98	3781.65	3324.62	5168.56	3723.37	4406.15	4736.7	3265.81	4657.15	3649.3	4619.86
416	764.64	0.672767	289.797	4654.66	4291.45	3705.75	4633.53	3881.75	4004.36	4263.19	3619.08	4871.88	4924.63	4244.23	4240.64	4433.29	4698.38	4264.03	4525.57	4042.1	4547.21	4848.64	3734.58	4425.95	5569.58	4365.58	4276.33	4764.54	4351.75	3985.37	5022.3	4368.8	4908.92	4938.59	4950.76
417	766.66	0.672767	293.548	3816.05	3748.09	3215.78	3181.64	3639.88	3290.18	3323.62	2826.93	3649.27	3454.67	3873.75	3685.44	3769.5	4057.91	3545.35	3301.67	2903.11	3419.95	3675.29	2677.84	2930.57	3034.7	3027.39	2828.84	3167.85	2739.59	2613.88	3001.12	2751.24	3247.28	3165.02	3291.47
418	784.661	0.672767	294.679	3491.37	3466.28	2828.93	3458.42	3057.93	3134.82	3423.69	2979.89	3591.13	3607.39	3265.53	3131.68	3183.79	3571.19	3253.96	3290.28	2890.73	3249.78	3562.63	2865.72	3009.69	3228.84	3088.68	3063.89	3557.13	2974.41	2847.36	3453.81	3129.43	3470.57	3652.48	3332.84
419	792.675	0.672767	295.874	9207.83	9764.46	8373.5	9018.15	8741.99	8427.91	9322.43	7509.02	9808.05	9330.27	9426.86	9507.23	9154.97	9665.98	9143.57	9122.72	7333.33	8188.3	9229.01	7205.08	7716.91	8085.77	8044.93	7563.31	8429.05	7507.08	7219.29	8238.57	7567.77	8550.26	8109.06	8237.89
420	806.64	0.672767	294.54	842.554	741.254	646.705	578.446	684.784	696.321	621.968	508.073	702.849	586.9	673.535	668.397	659.589	729.572	551.88	679.752	477.542	622.202	633.703	463.364	520.07	490.167	510.93	483.344	566.1	495.24	452.645	548.544	503.065	595.961	566.174	615.114
421	810.657	0.672767	295.762	3064.5	2930.7	2471.11	2843.95	2615.71	2648.88	2861.8	2445.46	2978.91	3070.33	2796.19	2739.61	2820.14	2874.8	2583.54	2869.11	2556.24	2811.09	2908.6	2439.62	2591.97	2620.94	2727.26	2661.04	3040.8	2707.52	2427.66	2865.21	2662.67	2856.36	2844.51	2751.57
422	949.701	0.672767	320.656	262.791	184.587	159.521	215.109	171.424	200.887	216.887	158.587	225.968	217.242	214.969	202.998	215.974	232.196	177.191	233.466	210.167	227.433	279.662	162.507	190.297	221.273	222.838	203.383	267.075	189.516	154.613	221.809	190.415	255.931	245.131	252.868
423	997.677	0.672767	315.629	448.097	316.402	236.045	376.105	207.285	277.979	389.057	225.477	415.152	377.025	317.547	277.312	310.817	379.052	281.069	388.365	315.883	337.219	392.493	311.38	292.535	267.834	294.17	318.349	447.552	273.717	243.879	400.914	294.754	350.811	440.782	353.682
424	459.201	0.706583	202.742	132.606	140.305	108.484	107.915	96.0037	101.02	110.489	108.456	150.721	128.033	132.123	110.753	118.251	99.5398	118.222	105.5	111.503	132.169	141.728	92.1929	109.347	118.675	113.025	115.425	119.799	105.461	98.077	124.365	88.8996	133.587	137.213	97.5706
425	489.396	0.706583	227.077	695.626	452.452	382.801	432.302	411.355	387.665	404.536	347.342	506.322	453.306	438.772	536.949	458.889	458.281	400.216	456.847	397.994	532.368	486.86	431.931	429.798	551.747	417.778	402.996	491.722	420.67	386.878	487.901	442.931	553.855	482.243	419.084
426	717.434	0.706583	257.848	324.593	330.326	260.174	316.805	308.612	326.126	309.808	286.066	346.39	370.706	299.728	326.457	301.012	310.18	311.26	347.248	308.181	348.86	339.671	268.673	305.924	342.972	308.448	323.778	339.229	328.109	245.618	306.485	271.45	379.446	338.527	333.743
427	811.434	0.706583	269.075	315.837	266.039	204.14	269.683	193.917	233.071	242.538	199.957	254.871	260.121	236.498	206.63	228.198	294.892	231.091	251.489	234.9	240.898	262.864	207.617	223.484	237.293	245.067	238.949	271.778	243.249	188.954	268.468	239.491	265.244	259.129	254.319
428	833.574	0.706583	291.882	261.657	228.18	170.893	235.792	197.201	172.223	275.633	192.904	268.264	251.472	218.987	187.87	218.466	223.251	209.083	229.276	177.626	244.84	281.954	202.291	207.408	264.933	243.96	230.634	256.143	222.244	193.591	264.536	249.137	277.213	297.95	301.379
429	481.258	0.7404	209.871	547.464	560.566	485.229	553.593	470.735	490.033	496.041	457.877	553.887	547.683	512.91	504.46	506.213	505.782	501.085	581.647	516.844	624.882	578.117	474.753	519.421	669.788	540.095	540.801	556.087	496.952	483.681	575.54	513.129	530.658	590.96	589.058
430	665.374	0.7404	246.156	237.25	313.056	224.752	240.987	246.938	277.681	236.413	201.702	279.478	291.942	257.536	224.898	256.005	258.406	216.556	246.12	207.745	253.692	263.967	230.602	227.792	215.548	242.109	219.351	248.215	192.331	228.744	238.464	186.597	223.941	252.477	203.193
431	680.551	0.7404	271.237	250.473	178.765	177.402	207.377	234.076	169.849	208.526	183.758	271.849	283.197	225.46	207.71	219.531	267.74	255.042	203.182	195.028	207.58	264.651	171.082	189.485	236.457	166.836	189.425	213.836	172.241	145.568	202.526	218.935	202.865	183.013	219.263
432	750.498	0.7404	277.186	274.381	250.925	211.78	270.175	240.126	210.491	214.456	191.487	254.8	264.909	259.065	232.379	226.93	247.098	220.481	256.006	234.602	230.007	247.238	195.206	261.42	253.829	218.893	261.019	275.628	237.659	223.143	212.694	222.888	287.386	251.499	257.662
433	778.477	0.7404	266.663	110.514	112.383	70.7617	123.505	96.1539	88.8826	115.435	101.23	98.3659	149.479	105.898	114.952	106.997	117.696	96.5991	128.987	85.2954	123.686	108.578	83.3082	117.19	119.116	107.385	102.184	136.986	97.5169	89.3508	135.814	123.184	113.943	102.741	131.218
434	840.453	0.7404	268.92	257.698	243.957	183.975	250.226	184.031	218.856	247.673	183.659	353.559	303.756	244.418	194.607	263.941	274.324	253.154	268.65	204.619	240.294	273.995	195.037	258.687	206.3	267.281	265.265	324.275	279.233	235.916	371.655	269.877	290.924	249.281	309.978
435	873.485	0.7404	280.311	199.946	189.367	93.5676	163.459	108.864	137.527	153.365	111.154	151.92	155.408	165.428	118.769	159.583	169.984	146.333	165.051	135.155	166.677	124.284	130.75	145.321	173.254	177.666	176.788	183.213	151.165	97.8525	206.461	138.374	160.449	203.982	206.417
436	873.618	0.7404	294.161	497.782	480.132	376.372	489.925	405.755	437.044	474.118	375.168	499.693	529.557	432.554	466.17	497.576	528.938	441.935	490.995	402.08	460.4	521.863	369.075	423.033	478.776	474.137	439.164	571.902	402.863	375.79	534.567	441.956	494.865	591.75	503.627
437	293.206	0.7742	182.68	316.074	335.905	333.003	358.394	333.092	272.57	319.971	334.139	361.143	294.127	355.668	308.19	322.632	380.472	318.725	354.768	323.715	368.897	356.997	303.565	389.686	373.204	335.24	326.647	353.384	332.345	332.88	363.668	423.267	341.766	438.879	499.7
438	454.189	0.7742	204.297	168.641	174.654	147.855	146.171	146.212	147.119	163.494	132.706	161.984	153.446	147.206	159.865	160.065	158.078	141.21	155.317	151.924	164.688	162.415	146.39	145.958	156.857	153.47	162.863	175.297	150.619	130.424	160.878	135.936	154.863	167.732	175.338
439	508.264	0.7742	213.941	469.807	433.697	379.068	454.695	342.399	398.584	429.853	354.856	419.512	441.283	419.876	420.972	393.73	417.244	426.16	423.145	416.754	437.352	455.199	369.118	387.609	422.811	386.328	425.095	420.008	394.605	339.323	485.986	402.394	467.371	423.001	412.398
440	549.296	0.7742	219.289	252.385	276.991	209.731	256.844	224.574	245.551	290.611	205.724	271.887	267.318	241.023	235.511	239.326	261.641	237.104	246.524	232.203	246.946	273.288	212.367	223.985	243.848	239.024	255.894	270.792	238.676	216.538	264.384	211.956	271.238	300.506	311.258
441	579.256	0.7742	220.443	122.862	122.44	101.699	107.283	90.074	96.2563	102.884	79.8399	120.195	139.238	99.0452	92.8507	125.864	107.765	99.3675	119.593	99.5891	101.421	116.94	92.2145	99.7695	102.994	90.9862	110.761	132.033	88.1622	103.283	114.433	108.57	108.62	144.292	88.1115
442	667.486	0.7742	262.179	320.816	312.707	281.283	355.967	294.489	305.769	348.598	310.364	352.313	334.224	338.692	307.769	303.914	376.962	322.681	334.299	263.248	360.486	345.575	317.177	313.228	344.991	313.493	335.413	331.9	331.609	292.236	313.213	326.841	369.518	359.422	359.088
443	730.414	0.7742	249.757	837.592	824.475	594.078	857.02	691.455	735.279	845.01	723.958	861.076	843.736	752.772	782.79	818.546	859.746	749.612	841.544	661.052	763.122	874.879	679.889	725.197	857.8	799.047	718.059	914.49	721.572	666.789	824.973	756.917	848.517	882.036	815.576
444	742.537	0.7742	268.19	3291.87	3196.64	2675.95	3313.94	2739.89	3041.14	3200	2705.43	3377.24	3408.66	3020.58	2908.97	3003	3301.18	2974.61	3157.84	2752.94	3007.91	3300.44	2774.48	2897.47	3144.55	3005.24	3016.83	3371.67	2910.85	2675.7	3182.93	2964.23	3358.27	3409.54	3269.16
445	801.689	0.7742	299.545	101.453	72.1785	73.2265	90.3003	72.4127	95.1835	92.1511	74.1059	88.7905	92.4765	88.6043	69.4623	54.1382	73.8282	85.4438	96.0517	64.6428	81.535	100.205	82.1097	88.3186	77.9059	103.587	76.1959	88.9769	95.1569	58.2022	92.2858	83.2538	87.691	131.036	102.638
446	843.635	0.7742	296.813	455.388	419.549	312.534	447.736	355.972	405.189	457.098	323.15	500.682	486.617	366.038	315.847	392.297	443.217	392.827	433.305	339.351	405.054	471.846	315.176	403.009	480.259	413.145	444.243	473.117	400.708	350.218	499.158	395.724	468.962	476.282	467.25
447	385.277	0.827783	202.354	2933.03	2817.62	2615.44	2640.88	2841.92	2785.41	2752.31	2421.93	5724.15	5779.61	3717.65	3524.17	4310.76	3895.96	5012.32	3498.99	5122.17	4481.1	5281.03	3110.19	4661.32	4660.36	4656.01	5512.72	6591.68	7013.07	6474.51	7909.99	4478.06	7544.14	3761.7	6781.56
448	667.42	0.827783	246.141	231.576	258.604	210.195	278.335	220.794	248.58	239.438	242.435	253.65	265.364	263.57	227.922	274.698	275.54	247.53	260.705	205.629	271.442	304.987	266.762	247.1	282.242	271.511	258.162	279.844	247.677	217.633	259.693	242.198	291.185	268.587	276.257
449	726.597	0.827783	282.465	1493.44	1375.14	1203.13	1422.38	1266.22	1252.06	1378.35	1166.13	1581.14	1581.46	1439.19	1422.96	1401.81	1555.74	1396.35	1393.93	1384.28	1350.3	1599.44	1199.16	1388.7	1404.24	1399.96	1376.08	1634.08	1429.35	1391.62	1703.74	1370.44	1620.29	1640.47	1628.63
450	733.623	0.827783	283.688	363.578	314.439	319.439	362.15	316.28	341.907	375.54	277.331	403.065	350.624	386.43	328.302	294.38	406.777	331.605	360.772	306.726	343.926	359.31	303.214	356.035	353.367	340.198	340.326	365.462	345.449	294.79	384.346	336.203	360.608	415.556	376.263
451	849.519	0.827783	286.768	702.547	672.304	515.764	674.237	539.639	609.714	715.205	508.355	942.495	860.916	649.234	667.784	750.485	851.369	700.428	696.598	739.38	832.814	933.95	614.745	689.291	770.497	784.512	793.079	1039.85	831.773	721.251	998.341	834.108	1019.48	779.186	1037.52
452	867.519	0.827783	290.444	421.865	361.644	291.366	369.234	358.504	334.205	375.872	267.966	751.795	765.07	442.763	493.062	602.719	519.516	582.206	466.736	650.812	576.207	775.529	379.115	552.743	621.013	588.145	676.58	953.639	824.634	741.244	1011.07	582.534	1100.64	450.413	936.128
453	889.507	0.827783	291.583	1060.06	1017.78	739.243	917.961	915.477	923.407	996.231	710.595	2024.61	1971.99	1176.64	1184.48	1616.81	1469.59	1627.66	1276.38	1929.6	1707.51	2079.14	1048.13	1642.87	1697.62	1795.15	1893.66	2622.08	2417.83	2016.99	2807.17	1671.64	2848.5	1522.94	2561.83
454	905.49	0.827783	291.505	365.796	362.645	229.627	325.201	271.427	319.31	339.683	265.098	584.464	540.938	487.27	347.588	510.791	446.165	563.748	366.216	626.893	553.404	524.842	325.84	516.445	508.704	551.242	636.486	752.269	818.645	664.685	1002.68	575.236	802.511	385.519	854.917
455	911.498	0.827783	292.725	342.439	342.612	204.399	336.138	270.584	277.401	363.769	201.905	464.144	417.676	368.679	262.156	368.075	411.38	351.633	347.074	373.848	419.181	451.607	263.731	368.135	370.955	383.706	434.691	548.601	393.035	347.553	572.027	431.108	498.544	430.312	570.081
456	255.081	0.8616	170.799	104.516	86.5177	73.6682	92.7267	71.7733	91.6085	82.2581	83.2233	83.5183	73.91	63.3377	89.8632	72.3675	75.2455	69.5826	101.282	81.9988	89.6878	109.884	88.37	81.4061	68.9208	96.1118	89.7282	94.7566	99.8509	69.3555	84.5111	69.7222	77.6005	84.6656	94.2621
457	293.284	0.8616	198.367	42.2644	40.6128	24.2839	34.3648	34.0073	23.1585	20.468	28.0931	65.6105	39.5137	33.5569	32.8273	35.7066	33.5552	31.2108	30.2688	57.4458	37.4086	51.4437	29.2442	67.9556	20.544	23.7873	30.6962	48.1019	39.6039	44.8497	45.3557	45.7902	29.3595	27.3307	40.5852
458	339.287	0.8616	203.281	1507.31	1447.49	1441.58	1355.16	1506.97	1397.97	1477.74	1151.18	3084.81	2775.33	1781.43	1691.12	1796.57	1721.25	2402.61	1522.99	1749.95	1559.95	1726.15	1123.63	1743.1	1819.32	1661.95	1897.12	3160.8	3170.94	2957.94	3801.04	2335.27	3002.89	1690.13	3218.95
459	465.405	0.8616	225.972	623.432	574.247	567.994	613.744	581.972	535.098	591.303	585.798	626.684	627.172	566.699	550.021	543.994	674.754	574.132	618.421	564.65	541.548	635.718	529.691	611.676	627.998	577.395	616.56	635.353	566.935	513.666	580.421	624.323	672.801	624.782	588.685
460	549.27	0.8616	220.721	232.951	217.33	167.015	220.757	172.421	208.192	207.085	177.932	234.18	203.204	192.255	209.031	197.965	198.599	193.811	211.472	200.076	185.142	225.787	203.765	191.322	187.778	198.336	186.778	241.436	204.273	164.965	224.621	189.356	249.965	249.838	213.666
461	593.502	0.8616	254.852	1843.92	1830.35	1601.64	1926.47	1653.55	1728.51	1855.19	1596.11	1930.59	2012.33	1721.02	1663.76	1795.24	1937.06	1721.51	1866.52	1614.61	1881.82	2019.25	1631.13	1791.32	1963.62	1772.11	1758.65	1994.79	1685.92	1650.87	2009.5	1716.98	2019.98	2148.99	1900.02
462	686.627	0.8616	275.073	376.215	406.327	344.638	436.245	353.164	373.156	377.318	381.591	425.069	371.966	352.24	326.526	319.508	449.595	326.297	389.446	324.681	363.799	422.129	310.153	342.525	312.034	406.914	389.575	388.806	339.699	290.845	441.24	370.127	474.821	450.514	376.743
463	795.419	0.8616	266.564	160.774	133.414	94.4395	166.564	95.6259	122.065	133.231	109.008	140.665	143.908	133.374	135.476	144.516	139.272	126.09	118.154	92.8937	119.608	150.972	90.4662	123.999	111.835	130.776	117.841	126.95	119.336	96.7016	135.892	115.616	172.229	161.996	129.659
464	801.658	0.8616	297.062	428.417	371.243	275.246	383.868	290.079	321.483	337.639	315.473	376.415	348.969	380.201	321.83	308.834	396.307	328.538	357.229	306.015	352.413	387.832	319.286	307.556	367.655	324.94	329.296	415.559	300.053	274.382	355.249	307.002	391.614	389.666	390.799
465	854.478	0.8616	272.725	219.433	192.271	135.374	218.361	165.829	155.717	187.693	145.712	246.513	186.306	215.357	188.995	176.943	196.553	161.104	173.351	167.729	182.733	213.572	155.838	151.467	173.326	190.504	155.603	209.152	181.393	164.072	224.927	208.785	265.43	196.95	246.86
466	916.646	0.8616	302.609	249.037	223.462	195.755	291.037	189.038	201.266	252.947	202.528	260.114	286.647	218.585	218.352	270.433	277.133	236.617	265.384	201.422	211.029	268.594	211.421	211.343	240.018	227.951	271.161	271.036	195.225	200.195	245.055	269.81	262.607	271.029	266.72
467	948.755	0.8616	324.248	230.51	171.2	136.632	179.127	150.586	182.92	198.547	137.653	226.473	198.118	207.176	149.815	209.781	205.241	151.758	169.016	150.616	167.695	200.536	175.724	192.136	177.585	151.137	181.765	209.526	171.558	149.749	218.312	188.494	176.648	215.862	210.352
468	512.411	0.895417	228.215	2095.65	2041.11	1831.72	2228.47	2063.56	1942.79	1963.61	2557.65	2098.96	2141.37	2247.6	1878.83	2014.5	2263.79	1899.52	2012.61	2610.83	3631.64	2144.03	1866.96	3787.51	4299.18	1990.71	2372.65	2170.9	1985.45	1815.68	2132.62	1989.94	2224.58	2413.72	2050.55
469	857.482	0.895417	284.2	228.266	250.055	215.084	229.12	205.034	216.964	238.964	198.878	433.549	409.691	299.453	272.758	337.926	315.403	346.513	291.849	326.275	313.343	351.686	185.173	321.098	269.033	356.058	362.343	500.157	436.616	329.211	537.774	370.991	418.774	360.311	457.214
470	457.192	0.929233	201.272	193.399	163.665	117.812	177.78	103.678	145.57	148.585	144.25	171.006	137.729	142.406	134.473	151.931	140.933	134.484	145.309	152.933	138.181	161.289	143.184	146.775	140.732	129.494	129.591	158.104	136.535	104.893	139.187	133.656	138.988	139.159	160.502
471	475.359	0.929233	228.676	356.212	322.137	272.321	356.471	254.656	304.62	319.409	265.686	351.177	354.831	315.859	292.454	306.819	349.188	318.79	355.693	286.915	307.735	361.47	286.703	323.054	326.244	311.384	298.274	370.385	273.29	276.713	326.223	288.79	384.674	374.982	367.579
472	684.537	0.929233	267.297	126.394	151.359	116.167	141.003	104.164	126.313	140.995	106.393	133.434	136.714	117.361	138.697	115.791	136.611	112.192	124.621	89.2425	115.497	133.246	132.689	105.43	135.293	112.007	104.755	106.73	110.43	107.563	133.353	114.824	136.992	150.372	102.747
473	720.401	0.929233	248.476	467.385	540.459	431.726	584.468	426.727	512.644	531.345	462.831	534.206	507.929	437.194	586.765	485.043	488.873	521.894	517.367	457.874	492.962	574.727	468.401	505.976	515.531	477.379	429.963	581.836	486.806	462.111	492.778	417.891	556.248	553.419	596.772
474	860.544	0.929233	291.733	594.869	595.782	486.861	597.604	551.981	558.658	615.739	441.948	977.827	960.591	689.103	703.317	736.821	818.012	875.276	728.125	942.199	742.554	928.944	501.795	841.84	817.625	857.774	932.024	1154.33	1011.47	902.681	1288.61	964.428	1087.91	825.591	1121.83
475	865.581	0.929233	289.199	191.86	189.281	145.076	201.703	177.633	179.567	166.465	159.56	250.052	250.365	213.314	185.396	188.127	254.486	212.105	207.062	193.378	179.411	219.884	148.037	212.662	211.74	229.644	221.708	293.186	201.145	191.948	276.381	237.369	269.099	243.682	286.118
476	384.232	0.982817	197.833	128.917	94.6566	133.293	131.466	93.4024	108.414	100.895	119.043	96.5871	120.508	123.643	111.369	121.378	116.93	96.0333	137.324	97.9088	122.112	127.798	114.155	89.3717	141.513	92.2665	98.0003	125.583	91.0898	67.8772	107.886	101.416	122.085	128.7	88.9251
477	416.328	0.982817	212.241	8778.12	9813.67	8790.93	10155.3	11104.8	10921.3	11354.7	10271.2	9899.54	10133.4	9480.91	9387.92	11234.7	11271.1	10846.5	11185.1	9102.78	9472.16	10106.7	8849.39	11250.8	11419.9	11009.5	11273.7	9980.84	9222.28	8972.9	9899.8	11767.8	11478.9	11906.8	13329.7
478	451.27	0.982817	207.304	177.918	201.776	184.009	219.406	196.325	181.944	220.587	171.751	211.259	220.957	162.098	179.609	189.963	224.018	196.36	203.723	201.22	226.516	193.211	171.192	188.699	202.318	178.917	167.505	188.515	186.028	178.029	162.12	192.642	223.305	236.864	180.125
479	467.319	0.982817	218.779	253.742	234.544	224.222	262.815	220.426	240.416	243.979	206.016	288.251	299.025	234.2	208.371	257.994	276.333	234.923	266.516	230.649	273.589	292.574	192.408	230.823	278.635	250.273	242.112	271.265	266.296	252.443	287.35	260.147	268.505	312.442	204.039
480	551.053	0.982817	265.935	1164.22	0	0	0	0	0	0	0	0	0	0	0	0	0	0	0	0	0	0	0	0	0	0	0	0	0	0	0	0	0	0	0
481	633.522	0.982817	259.816	295.385	352.672	311.998	306.295	360.571	311.076	273.444	226.389	578.313	587.395	353.727	407.172	468.58	469.209	460.998	406.8	455.689	471.994	530.717	297.462	452.165	447.676	492.619	503.215	515.381	517.475	505.853	628.314	394.554	586.031	433.395	469.46
482	635.535	0.982817	263.763	3121.19	2555.32	2083.73	2410.75	2433.66	2402.22	2364.23	2098.89	3238.97	3437.94	2488.61	2646.86	2755.67	2901.82	2832.16	2898.53	2844.64	2828	3251.85	2239.75	3002.02	3165.35	3058.86	3141.29	3339.08	3142.16	2880.04	3604.92	3019.28	3682.49	3168.51	3289.48
483	642.499	0.982817	258.412	7736.51	8179.83	7072.8	8634.87	7643.71	7742.75	8219.87	7666.32	8705.31	8575.47	7827.48	7808.52	7926.15	8470.71	7430.7	8100.23	7619.94	8863.6	8795.48	7382.35	8662.25	9214.52	7911.04	8177.65	8513.95	7587.3	7112.09	8682.55	7875.43	8838.19	8934.26	8201.22
484	716.585	0.982817	272.263	406.747	375.707	258.131	344.161	294.147	281.49	306.144	267.294	319.854	391.192	286.999	309.353	264.607	344.738	291.032	378.628	291.318	326.018	339.773	283.848	318.636	317.358	308.897	298.454	327.216	302.833	287.21	375.229	320.739	363.784	328.008	375.706
485	717.397	0.982817	252.522	1274.83	1219.65	997.424	1286.01	1119.98	1115.01	1231.31	1035.99	1210.75	1271.98	1129.46	1124.58	1157.12	1255.72	1136.29	1201.36	1029.5	1204.23	1323.28	1074.84	1073.46	1184.31	1111.71	1112.08	1227.66	1089.15	963.188	1212.98	1128.08	1304.57	1368.94	1297.02
486	856.558	0.982817	293.004	908.927	966.683	777.846	885.459	879.166	850.672	876.092	716.196	1579.99	1559.87	1124.06	1169.14	1289.07	1321.19	1318.06	1197.19	1398.67	1297.39	1668.06	897.743	1404.17	1449.48	1468.17	1436.1	1943.2	1585.09	1389.47	2049.73	1492.81	1947.78	1283.3	1843.97
487	886.573	0.982817	300.296	215.264	256.029	204.382	173.073	247.6	210.948	203.95	143.262	388.042	419.325	306.258	278.972	344.414	345.066	344.41	300.98	433.382	324.354	330.148	184.857	389.74	310.016	374.887	430.347	485.337	402.425	451.106	481.176	483.964	373.095	345.514	529.859
488	896.67	0.982817	308.833	568.758	603.914	497.259	717.571	546.211	581.629	610.274	489.985	768.063	685.612	561.261	581.484	630.353	636.233	627.101	602.79	560.414	590.484	717.315	499.776	617.142	660.667	612.644	652.403	754.949	574.807	488.989	729.901	633.299	740.806	744.433	711.751
489	350.296	1.01663	204.546	417.845	415.306	384.499	383.488	414.164	377.019	375.371	371.247	492.139	482.074	450.04	423.813	452.552	469.992	502.889	479.982	429.976	483.398	510.06	344.231	445.925	516.657	434.607	418.432	460.676	428.276	388.185	488.493	427.179	447.067	443.539	483.09
490	542.29	1.01663	222.217	1440.82	1529.9	1293.24	1471.53	1498.75	1461.07	1540.54	1293.2	1848.31	1884.41	1553.35	1615.95	1643.25	1661.37	1645.33	1688.39	1445.52	1625.7	1696.59	1371.43	1623.09	1663.32	1612.11	1631.97	1771.44	1570.09	1466.06	1732.04	1515.54	1825.3	1600.28	1718.66
491	550.869	1.01663	265.938	2059.99	0	0	0	0	0	0	0	0	0	0	0	0	0.764163	0	0	0	0	0	0	0	0	0	0	0	0	0	0	0	0	0	0
492	566.289	1.01663	224.827	701.841	756.25	610.794	594.213	722.557	690.105	609.477	568.816	1375.62	1430.95	907.876	987.827	1086.91	1080.76	1173.64	931.565	1394.48	1147.32	1522.06	716.731	1312.95	1316.76	1380.25	1422.57	1582.63	1657.29	1468.52	1901.14	1141.23	1811.23	1063.27	1495.9
493	607.499	1.01663	257.392	6285.09	5853.99	4723.18	6391.78	5477.62	5771.57	5679.16	4626.02	7747.1	7814.9	5764.22	6302.87	6408.24	6452.92	6284.56	6487.98	6138.6	6632.67	8210.48	4852.79	7415.89	6690.5	6376.35	7454.16	8088.77	6661.69	5848.6	8401.26	6309.6	8400.22	8072.7	7731.05
494	611.536	1.01663	261.339	1106.04	1187.8	982.363	942.489	1287.68	1160.89	1032.15	875.931	1923.1	1936.28	1437.85	1434.24	1732.96	1654.84	1932.6	1514.83	1490.35	1496.94	1546.97	913.552	1563.12	1569.11	1552.8	1700.84	1727.92	1527.14	1386.69	1825.64	1381.6	1644.59	1347.53	1756.21
495	675.53	1.01663	266.059	311.235	321.718	278.276	311.044	273.286	305.996	319.22	277.24	428.933	408.153	305.207	331.536	378.737	386.449	370.607	321.535	387.875	345.177	439.298	297.774	382.605	416.847	369.28	410.271	456.196	376.901	390.528	474.995	401.246	479.013	448.027	487.599
496	677.533	1.01663	268.657	817.801	763.038	730.346	948.007	806.79	804.24	799.374	761.667	963.219	989.894	770.446	859.736	910.932	836.885	832.37	895.6	806.252	901.939	997.683	807.513	840.869	899.332	930.46	917.419	1026.16	866.343	891.295	969.105	923.867	1083	1019.16	947.595
497	679.435	1.01663	269.945	198.053	200.016	205.574	248.661	187.825	249.001	265.936	222.352	278.657	253.756	189.42	200.321	199.079	206.59	165.035	173.92	208.313	208.6	208.795	232.426	181.149	207.192	161.282	184.459	238.09	227.652	114.962	195.338	194.692	256.58	199.953	213.166
498	738.399	1.01663	256.384	195.262	203.074	169.076	219.054	176.312	167.092	201.041	160.888	222.002	226.802	188.304	173.766	175.963	204.167	195.373	180.791	160.148	191.145	243.028	150.389	183.222	200.376	181.663	180.999	190.612	186.751	170.939	177.933	187.606	207.595	217.293	190.932
499	832.547	1.01663	289.379	974.474	957.644	760.718	830.496	1038.35	903.147	888.412	707.681	1591.67	1615.32	1086.08	1206.6	1422.53	1324.44	1498.05	1267.63	1220.1	1212.31	1595.49	763.343	1267.22	1440.42	1357.37	1408.3	1627.74	1261.09	1209.49	1680.33	1287.71	1669.58	1247.09	1660.43
500	866.706	1.01663	315.071	1825.58	1778.47	1450.71	1948.59	1558.79	1670.93	1886	1548.36	2028.46	2042.68	1764.57	1633.92	1778.95	1943.48	1650.66	1837.34	1615.16	1810.99	1980.44	1456.99	1605.51	1837.23	1715.5	1860.5	2138.53	1734.2	1541.72	1989.7	1733.22	2096.57	2059.21	2003.31
501	877.548	1.01663	294.141	720.581	709.702	527.681	704.993	610.813	619.68	763.969	523.393	880.444	870.262	699.616	631.174	810.343	820.456	808.829	802.815	662.359	761.07	857.031	548.995	711.058	704.581	826.916	764.024	937.593	737.597	719.573	1012.59	822.21	949.854	880.866	963.306
502	878.524	1.01663	292.888	149.772	151.228	109.16	149.948	127.022	146.082	173.442	99.8633	243.689	230.578	182.137	183.498	204.012	216.814	224.374	198.788	229.888	196.617	237.662	87.9086	229.822	200.722	257.652	219.249	357.167	228.364	254.295	337.797	243.708	312.199	214.122	297.536
503	163.129	1.05045	161.611	263.256	208.006	221.391	204.768	245.977	236.999	240.428	181.034	208.226	229.799	228.013	227.691	209.174	249.489	224.458	257.877	214.24	203.153	216.712	246.267	216.939	228.233	241.345	242.343	222.764	237.799	254.768	242.201	223.322	197.986	246.798	239.334
504	293.206	1.05045	182.68	555.36	532.003	452.464	531.508	541.446	531.418	541.811	534.444	531.396	546.185	517.176	507.885	525.963	521.741	511.141	560.545	554.929	510.314	526.966	525.959	599.598	615.611	526.241	525.87	496.772	546.395	522.552	555.842	620.729	566.326	551.66	550.06
505	573.35	1.05045	228.992	147.318	161.831	123.248	136.52	144.194	118.353	161.467	131.358	148.432	178.86	164.772	156.891	147.067	136.324	142.349	174.447	139.365	164.599	181.162	145.864	141.095	170.599	146.868	130.666	172.667	174.899	141.607	156.997	140.867	166.541	182.888	137.587
506	583.417	1.05045	254.951	2361.29	2385.08	2213.93	2589.59	2405.07	2331.03	2508.04	2469.67	2493.44	2611.78	2417.06	2280.25	2340.26	2632.8	2361.93	2472.78	2361.51	2465.67	2529.07	2200.88	2360.51	2479.88	2354.78	2299.54	2560.83	2205.64	2103.53	2510.2	2400.2	2531.1	2660.47	2500.74
507	649.518	1.05045	262.325	887.942	1125.3	855.475	1002.8	1148.83	983.857	940.705	719.52	2515.64	2378.73	1373.83	1596.39	1793.36	1687.21	2084.92	1507.01	2382.75	2044.07	2759.59	1298.52	2361.38	2313.23	2367.48	2496.87	3247.31	3124.19	2616.19	3662.41	2371.92	3255.62	2629.77	3139.48
508	651.536	1.05045	266.254	1918.06	2634.06	2124.17	1953.49	2991.26	2361.39	1948.17	1732.55	8110.85	8246.66	4082.46	4519.91	5859.61	5372.76	7063.07	3924.3	9851.48	6753.5	9888.83	4027.12	8750.96	8512.85	9380.24	10032.7	13509.9	11932.7	10229.7	13800.4	10403.7	12443.7	9754.07	12688.7
509	679.563	1.05045	272.542	1136.92	1235.7	1198.51	1316.52	1138.41	1123.19	1112.12	1121.4	1290.26	1416.49	1276.23	1228.17	1299.82	1433.86	1279.38	1285.11	1264.03	1196.95	1465.78	1131.41	1216.13	1262.99	1412.46	1239.93	1308	1265.07	1308.57	1439.22	1327.13	1445.86	1483.8	1404.38
510	804.52	1.05045	287.024	806.135	794.086	682.192	743.68	819.556	750.5	721.366	574.407	1399.59	1295.56	956.677	1022.19	1121.1	1074.17	1176.41	982.719	1091.34	1029.1	1306.46	702.924	1095.3	1153.28	1102.55	1183.17	1436.49	1148.56	1072.94	1420.69	1203.99	1418.6	987.913	1444.08
511	833.477	1.05045	270.251	260.852	220.554	168.728	261.08	210.481	201.683	219.843	158.672	268.252	306.459	196.076	230.447	221.03	234.232	195.513	242.217	228.76	270.515	276.296	183.233	232.609	253.491	244.654	249.384	323.167	262.372	174.178	262.834	273.885	306.007	280.555	268.838
512	851.562	1.05045	294.279	2584	2449.08	1849.21	2415.74	2033.82	2192	2295.1	1750.78	3093.72	2979.33	2378.07	2434.15	2570.79	2851.16	2583.17	2635.12	2416.63	2630.13	3093.05	1942.48	2555.1	2748.48	2642.32	2643.32	3275.18	2584.99	2376.66	3241.14	2899.16	3038.78	2924.62	3174.25
513	858.699	1.05045	305.369	833.622	810.146	634.85	784.913	680.124	722.985	786.311	628.986	904.425	930.769	745.508	674.392	752.209	854.961	672.277	820.683	683.032	877.783	884.497	644.418	705.47	796.378	717.888	724.098	886.173	751.247	639.178	822.563	737.456	854.507	897.302	816.819
514	870.524	1.05045	292.93	362.59	380.169	247.221	291.378	408.275	338.871	282.557	200.818	863.987	861.9	463.34	586.639	678.276	643.224	765.616	585.934	757.022	662.48	987.495	351.3	785.495	830.96	827.715	832.009	1054.09	913.592	825.496	1155.45	748.257	1149.95	561.733	990.27
515	873.544	1.05045	295.407	784.665	767.723	558.109	690.232	730.655	690.299	648.713	495.029	1366.79	1390.67	804.963	954.85	1124.94	1101	1145.96	997.577	1285.37	1010.36	1480.13	689.748	1240.15	1342.58	1296.67	1359.77	1782.4	1496.88	1239.15	1933.43	1320.62	1716.04	1190.72	1581.97
516	886.521	1.05045	294.095	409.167	457.57	388.35	433.675	512.347	438.005	457.583	347.327	835.09	803.235	601.343	632.151	718.896	759.294	775.889	555.906	805.959	755.243	875.166	465.127	797.76	804.957	755.947	818.306	1032.54	861.351	823.228	1041.46	869.063	969.961	589.264	1011.72
517	894.531	1.05045	296.541	634.002	571.242	441.417	600.224	554.199	565.388	547.746	375.126	929.081	876.271	661.282	679.619	646.042	740.236	745.15	715.501	810.197	747.025	918.546	476.844	765.508	854.599	771.441	811.433	1148.63	867.957	733.291	1105.54	969.501	1026.95	830.779	991.766
518	910.522	1.05045	297.702	233.639	313.651	222.734	274.92	197.377	245.189	256.058	190.95	432.028	406.026	248.329	292.239	326.831	355.341	364.963	310.13	348.706	366.525	405.725	241.171	369.352	394.964	384.901	394.683	581.52	396.324	348.681	537.638	433.627	552.832	361.501	542.999
519	950.717	1.05045	320.651	288.526	340.403	272.273	362.995	286.31	323.124	350.841	322.894	358.894	380.097	323.571	341.479	337.468	297.276	320.871	377.928	265.516	361.049	398.846	288.497	330.473	362.213	345.175	315.874	356.029	318.182	237.04	365.078	320.392	378.7	379.488	411.011
520	960.763	1.05045	320.604	1938.24	1741.6	1243.4	1805.22	1468.81	1542.75	1826.85	1373.22	1883.36	1820.4	1536.45	1544.47	1584.28	1848.33	1545.83	1748.26	1437.57	1701.95	1859.43	1367.62	1539.94	1791.58	1655.81	1490.76	1899.42	1528.09	1389.19	1880.4	1589.09	1892.05	1984.1	1828.66
521	599.502	1.08443	257.467	1512.22	1974.89	1827.72	1537.35	2262.79	1813.25	1571.04	1476.71	3295.11	3209.27	2694.33	2847.53	3101.01	2930.18	3260.13	2342.07	3514.19	2813.55	3365.55	1701.99	2887.4	2732.24	2780.09	3202.56	4172.47	3800.21	3555	3950.09	4119.24	3918.94	3414.79	4251.3
522	623.506	1.08443	259.905	1205.1	1513.96	1183.23	1142.95	1845.2	1394.85	1106.7	992.405	4960	5176.9	2708.99	2980.4	3643.62	3287.22	4113.69	2603.78	6017.82	3939.79	6283.84	2248.5	5184.71	5071.87	5271.18	5967.08	7436.58	7342.12	6132.5	8489.71	5701.27	7774.19	5600.7	7277.93
523	625.518	1.08443	259.887	6462.36	8712.47	7698.2	7290.43	8932.11	8043.39	7553.41	6438.82	13843.7	11601.9	11047.1	11942.6	12612.5	11057.6	14182	9514.24	14425.1	10023.4	13337.8	7431.98	12922.7	11072.6	11917.4	13399.5	20363.2	19776	16488.5	20078.4	17294.4	18515.3	11159.4	20438.9
524	625.611	1.08443	261.211	125.238	78.5289	66.8492	80.8378	89.4284	88.459	84.3432	56.5479	119.568	109.462	82.8328	86.7836	96.392	99.6903	97.501	108.333	86.2364	98.0638	114.407	78.9916	92.4495	84.8475	117.112	107.329	103.458	85.5998	111.603	131.456	96.2839	113.504	111.742	109.543
525	627.536	1.08443	263.834	6170.6	12452.5	11484.7	6477.39	15837.4	11523.3	8451	6379.54	27688	25455.2	23518.8	23424.9	25605.4	23692	32435.4	13539.7	42245.8	24386.2	28066.6	13345.6	30391.1	23763.6	26827.5	29089.4	45936.1	41188.2	38165.7	40220.9	40241.6	37802.9	20934.3	43059.2
526	627.788	1.08443	263.832	0	0	0	0	10.464	0	0	0	51.4109	52.3254	12.0871	16.0698	31.4074	19.9567	63.9361	9.33569	69.3087	27.0218	56.0013	5.88033	48.269	48.4005	57.7729	59.2057	86.6164	85.3325	74.8219	103.019	59.3131	89.3453	11.013	78.7919
527	631.567	1.08443	266.427	1199.84	1343.72	1120.19	1375.48	1167.43	1325.95	1320.04	1042.31	1616.05	1571.96	1322.43	1275.79	1445.92	1395.22	1352.58	1329.58	1109.54	1451.96	1408.43	1030.06	1179.38	1754.4	1331.53	1362.45	1503.57	1294.12	1126.84	1457.26	1334.24	1529.05	1495.49	1501.66
528	655.562	1.08443	270.14	2977.9	3337.45	2838.8	3089.09	3245.94	3188.65	3089.31	2716.82	4633.17	4640.61	3598.36	3709.95	3957.71	4058.75	4353.3	3737.56	4209.46	3859.01	4621.79	3066.52	4261.74	4276.09	4434.83	4449.97	4882	4247.28	3932.8	4738.62	4390.45	4868.26	4228.58	5013.61
529	680.665	1.08443	285.365	157.387	181.094	146.167	160.421	143.701	157.308	158.792	139.887	170.47	148.871	146.698	150.508	138.726	167.028	156.046	179.017	151.522	141.672	177.061	128.698	165.025	133.652	129.181	165.427	155.24	147.105	139.721	166.989	152.85	185.485	172.459	173.465
530	681.609	1.08443	277.689	573.579	634.106	487.558	528.216	608.687	561.872	576.602	483.179	796.172	834.325	656.468	674.843	739.151	730.188	680.786	680.332	652.385	662.283	776.633	525.78	690.091	749.399	694.133	744.312	724.372	686.735	650.744	746.752	685.98	775.16	666.282	728.878
531	713.668	1.08443	285.104	246.602	256.343	239.604	276.232	229.634	236.541	243.035	220.44	259.467	278.821	248.582	215.539	234.156	275.442	225.905	267.229	228.456	236.33	294.099	224.207	237.548	246.867	248.503	254.438	270.688	240.011	237.343	289.943	265.173	252.359	287.189	249.816
532	732.446	1.08443	256.422	254.908	238.079	191.103	259.582	209.012	226.415	235.808	210.124	221.325	255.809	225.337	201.757	233.119	248.907	211.455	230.518	194.777	228.668	254.081	191.875	231.715	245.406	206.233	224.725	218.04	198.594	186.548	257.031	219.29	239.86	241.966	222.506
533	844.509	1.08443	289.313	914.431	1003.81	709.67	747.66	997.291	880.964	817.823	588.698	2297.76	2416.4	1325.58	1550.43	1817.12	1561.97	2009.24	1436.42	2101.44	1729.72	2485.2	987.062	1985.22	1951.09	2068.93	2262.65	2923	2766.36	2490.31	3459.54	1927.26	3099.99	1595.58	2636.85
534	848.541	1.08443	291.798	1062.56	1058.41	819.815	766.611	1222.84	984.667	800.735	655.665	3114.38	3016.01	1529.38	1824.2	2225.85	2051.65	2760.9	1694.56	2676.49	2089.45	3108.09	1009.08	2514.4	2896.71	2744.39	2932.6	3577.14	3282.11	3035.17	4186.47	2453.7	4055.4	2070.59	3372.71
535	862.503	1.08443	290.47	439.245	430.056	300.476	396.785	462.767	414.786	345.541	302.218	740.865	710.001	506.101	548.471	685.219	602.371	663.49	593.767	611.26	522.02	752.535	380.054	540.03	644.393	638.536	665.963	811.77	689.022	607.608	833.439	639.821	779.473	571.016	767.827
536	864.516	1.08443	294.209	428.871	537.257	395.438	370.232	695.815	548.356	439.014	347.384	1331.93	1243.99	776.432	909.803	1039	1004.24	1292.85	784.267	1277.76	1039.88	1370.06	540.745	1256.59	1344.6	1287.27	1432.47	1585.93	1586.9	1419.86	1793.9	1219.5	1660.25	869.058	1537.03
537	881.55	1.08443	301.556	138.97	132.129	102.246	84.721	98.8233	106.159	99.3365	81.2307	174.665	172.59	120.706	128.146	157.739	160.214	171.964	162.355	162.935	153.383	169.959	98.4031	191.685	160.815	155.328	132.952	243.936	168.558	158.683	180.327	160.338	180.335	140.337	211.259
538	515.348	1.13798	228.182	43876.5	51949.4	48157.1	54836.8	49937.8	51454.4	52892.5	49258	55120.2	56214.9	51514.2	51690.5	51368.2	54531.5	51132.7	53701.7	49711.8	52128.7	54975.3	48738	50456.3	52266.6	50808	50370.2	53302.5	50688.5	48130.5	53694.5	50234.5	56418.6	55153.4	50095.8
539	603.536	1.13798	261.415	3172.91	3871.27	3387.72	3471.52	3964.48	3668.46	3623.83	3087.37	5443.76	5025.36	4270.43	4483.43	4883.94	4564.39	5017.1	4532.46	3801.41	3896.31	4611.95	2952.31	3949.3	4289.41	4082.78	4310.73	4879.62	4361.93	4387.35	4927.23	4394.01	4753.44	4318.42	5047.12
540	605.55	1.13798	264.039	1348.47	1872.64	1634.49	1424.26	2398.15	1852.26	1509.13	1284.22	4625.17	4718.67	2710.38	2962.09	3661.07	3146.23	4149.22	2845.57	3544.08	3023.81	4020.86	1882.34	3470.76	3572.58	3641.16	3662.78	3715.74	3494.4	3401.71	3978.49	3199.7	3582.69	2746.6	3704.73
541	643.586	1.13798	271.544	116.023	133.584	117.997	128.115	143.949	122.639	144.066	128.514	204.319	180.554	153.95	173.739	183.929	199.349	168.217	167.526	137.484	138.023	138.239	114.134	133.37	142.691	155.719	161.287	187.062	137.351	134.545	191.252	169.677	156.726	138.528	155.126
542	693.651	1.13798	285.259	3140.27	3218.54	2817.95	3540.19	2992.35	3147.85	3385.88	2876.87	3533.04	3554.18	3241.34	2988.59	3153.87	3470.53	3026.66	3269.93	3004.91	3301.42	3558.96	2960.86	3046.83	3412.98	3159.27	3162.47	3525.07	3030.79	2878.44	3475.3	3139.16	3567.16	3612.88	3279.23
543	705.604	1.13798	274.928	294.242	293.379	215.336	292.728	220.688	238.571	266.037	208.807	287.216	264.942	248.152	241.855	237.14	266.849	238.72	238.635	214.333	263.181	252.956	218.645	238.971	259.311	248.311	247.209	264.326	243.886	236.913	279.29	219.226	278.393	262.65	267.733
544	826.558	1.13798	290.669	479.539	530.209	409.072	425.426	603.693	488.015	429.344	357.03	1124.85	1091.76	642.083	730.038	924.626	785.394	969.181	718.52	848.849	824.508	1141.87	480.435	866.604	999.214	940.862	937.921	1171.46	931.05	936.746	1143.93	835.493	1145.14	783.586	1006.18
545	840.638	1.13798	296.83	741.742	813.196	602.281	780.032	709.674	729.36	772.902	662.441	916.229	901.481	743.317	769.406	762.948	813.062	792.83	807.623	684.12	815.569	855.383	655.285	716.237	774.47	760.048	765.223	889.947	726.653	661.712	891.25	784.737	899.917	868.696	807.994
546	190.032	1.1718	156.411	1863.83	2077.17	1821.99	2130.91	1885.89	1936.09	1980.79	1857.47	2131.92	2058.87	2072.46	2051.04	1949.26	2038.17	2027.21	2031.5	1853.48	2048.86	2114.15	1893.48	1900.51	1992.03	1904.09	1947.61	2107.68	1980.31	1784.49	2056.68	1866.17	2129.25	2116.25	1875.31
547	491.296	1.1718	212.678	183.535	218.802	174.337	189.491	182.7	181.58	219.118	200.427	207.939	211.683	197.595	191.589	188.914	214.398	178.939	188.745	192.157	176.034	204.476	184.845	187.468	208.977	186.634	208.083	176.458	172.43	158.894	176.956	182.441	215.454	218.817	207.001
548	505.378	1.1718	228.298	492.91	508.345	409.37	558.307	460.526	456.487	527.573	416.313	524.555	493.686	474.913	463.079	454.051	556.943	452.628	488.401	438.671	467.3	516.494	469.281	474.59	490.311	463.177	438.837	493.902	472.898	462.151	505.775	496.428	540	556.788	507.79
549	511.452	1.1718	238.023	119.146	135.389	110.708	159.137	121.154	132.413	136.275	96.3033	130.489	142.193	138.792	138.038	109.273	174.498	130.416	122.372	134.188	135.137	115.865	147.214	150.604	143.072	138.238	124.248	137.38	143.774	140.751	150.245	120.771	144.612	156.782	163.219
550	536.422	1.1718	234.957	266.947	326.267	247.638	329.296	270.984	295.608	310.403	263.095	362.464	310.88	290.23	324.537	271.454	298.708	340.736	314.437	272.772	324.101	300.454	230.531	293.26	283.781	271.584	278.827	334.791	315.035	251.819	297.807	285.022	309.087	324.083	306.559
551	575.503	1.1718	255.032	639.408	889.168	725.032	667.407	852.281	734.973	706.559	633.427	1361.21	1295.36	1000.2	1107.61	1135.16	1029.63	1177.61	1068.56	902.97	917.921	1097.58	624.155	974.642	997.169	964.433	1179.7	1219.66	1125.5	1228.3	1387.35	981.23	1207.72	952.751	1239.4
552	577.52	1.1718	257.686	3886.24	5197.74	4464.54	4298.96	5787.62	4850.07	4228.1	3537.12	10908.8	10081.7	6924.94	7279.34	8384.75	7444.96	9049.15	6806.98	8334.49	7072.81	9696.31	4736.58	8252.95	8246.4	8384.38	10314.4	10906.7	10189	10122.5	11841.9	8542.15	10076	7432.46	10070.9
553	581.322	1.1718	226.103	226.871	222.76	152.006	215.546	152.035	164.74	181.557	162.184	216.655	190.978	177.226	201.377	199.252	190.382	182.621	194.013	174.149	194.258	209.153	156.869	168.026	162.905	181.155	185.157	207.297	178.147	160.702	218.355	186.814	192.962	211.448	175.212
554	585.521	1.1718	257.604	193.301	263.962	211.398	247.6	314.641	230.541	211.026	200.503	386.126	415.695	285.652	294.156	349.072	315.911	381.024	314.945	283.42	294.178	356.867	200.749	304.354	314.542	307.999	315.013	356.312	273.872	273.53	375.412	300.576	343.14	297.146	340.308
555	613.553	1.1718	263.963	321.382	259.23	232.502	247.935	282.974	245.041	228.901	201.843	377.473	401.238	301.192	406.529	339.716	330.239	330.833	306.166	272.129	309.038	464.469	216.201	283.541	384.203	317.386	319.373	343.428	277.187	274.061	348.56	336.995	494.91	307.452	396.092
556	709.542	1.1718	267.112	795.304	755.492	690.878	797.192	732.541	706.354	760.334	662.595	857.02	846.742	716.022	746.501	697.702	821.677	698.742	772.5	651.984	755.78	878.393	680.014	706.017	767.498	701.383	684.273	824.259	698.984	705.808	790.709	694.358	818.579	865.018	754.255
557	734.465	1.1718	261.697	417.78	394.069	317.392	385.253	339.531	404.579	387.448	357.992	444.017	403.596	355.645	369.081	396.359	415.53	335.892	420.046	335.74	388.276	377.893	316.617	326.986	403.561	342.135	391.528	435.973	356.614	383.895	399.694	372.03	408.956	444.706	369.57
558	734.645	1.1718	290.006	220.866	246.729	160.714	233.747	208.433	217.801	234.345	213.326	257.325	262.13	211.902	193.526	247.211	234.912	196.867	220.872	190.451	225.844	237.475	189.435	182.421	282.68	246.662	233.919	254.157	232.54	185.562	257.158	219.507	228.68	242.745	227.952
559	798.527	1.1718	284.531	993.343	1004.41	830.707	910.06	1056.56	1020.04	946.049	782.339	1883.83	1862.58	1264.96	1296.48	1453.13	1345.87	1433.29	1280.08	1355.06	1300.76	1694.02	861.816	1403.21	1436.12	1420.99	1456.18	1741.91	1582.14	1427.25	1853.51	1332.58	1645.11	1251.43	1645.69
560	809.473	1.1718	272.966	272.968	256.721	225.684	235.754	206.714	251.833	223.789	182.739	293.524	296.357	240.295	249.703	250.006	272.478	274.856	267.155	231.16	274.308	304.483	217.53	243.926	264.378	276.356	238.753	328.501	245.591	231.896	324.867	253.594	289.818	299.604	342.949
561	833.469	1.1718	281.792	131.683	112.12	82.8903	112.044	93.841	107.476	116.229	74.7092	139.438	156.465	108.105	104.609	112.164	124.031	114.483	114.674	110.92	102.317	148.229	90.3279	123.477	119.893	115.257	108.672	157.639	104.05	76.2059	148.834	132.572	174.361	124.657	156.67
562	836.502	1.1718	286.84	335.8	313.321	217.843	283.388	244.708	248.83	237.461	234.733	427.994	409.95	345.769	347.969	418.657	332.833	363.051	305.486	303.689	383.342	420.681	249.53	347.967	401.154	387.025	374.22	488.047	363.298	361.003	497.851	398.058	484.461	350.81	460.409
563	847.645	1.1718	307.882	345.961	239.242	185.776	260.232	191.88	241.072	212.84	173.22	300.646	287.314	199.791	246.105	242.594	271.457	225.355	272.894	202.108	249.876	309.365	191.569	205.27	278.808	230.424	217.833	282.013	208.796	174.478	292.387	257.996	262.878	294.507	254.814
564	874.648	1.1718	307.73	318.37	283.172	204.739	294.862	222.463	258.199	278.649	223.968	373.382	368.027	278.079	257.871	280.785	322.242	305.259	273.157	286.06	272.284	322.141	229.52	264.901	297.493	262.518	281.463	374.03	233.003	282.92	346.029	295.69	329.71	362.291	344.032
565	900.576	1.1718	294.024	339.042	395.927	260.194	416.025	274.997	347.704	313.188	267.91	463.732	388.488	393.307	396.939	458.205	372.226	466.011	435.021	417.829	398.335	496.316	287.75	411.043	450.123	379.555	418.856	636.498	463.781	393.39	598.235	559.531	622.605	405.316	669.005
566	549.381	1.20562	232.03	251.828	240.228	197.914	243.05	224.027	216.309	238.744	182.757	229.509	279.57	227.045	235.826	247.822	256.343	221.509	243.076	214.827	208.973	227.738	216.913	211.78	255.385	236.971	212.628	267.167	230.515	215.645	239.269	208.825	249.691	230.8	254.086
567	549.489	1.20562	252.621	2082.76	2212.85	1877.96	2166.51	1964.56	1920.21	2088.11	1656.82	2888.08	2809.93	2214.35	2309.54	2390.48	2466.63	2318.94	2325.64	2207.09	2283.56	2622.09	1784.18	2171.57	2394.34	2325.29	2969.81	2893.9	2681.46	2942.94	3354.09	2360.45	2865.3	2551.19	2787.52
568	579.397	1.20562	238.678	289.277	276.817	224.399	309.211	226.351	278.565	254.898	251.755	291.99	250.788	223.898	244.51	247.113	267.757	258.255	265.539	242.598	277.582	307.508	259.074	262.216	265.714	287.58	221.833	271.383	252.19	235.311	291.567	274.831	244.294	285.454	296.525
569	600.384	1.20562	238.486	193.191	180.689	163.945	207.665	170.817	175.986	191.268	134.794	186.578	192.088	145.328	149.27	195.193	184.55	165.454	225.532	170.759	170.169	194.964	152.382	158.8	187.219	181.826	197.575	177.706	176.278	146.712	203.695	163.288	211.261	199.639	177.882
570	724.398	1.20562	248.451	1334.78	1297.18	1066.06	1338.81	1103.28	1157.05	1263.11	1069.43	1423.55	1347.6	1168.76	1182.74	1245.87	1288.63	1178.88	1284.69	1116.96	1297.41	1369.44	1116.59	1101.88	1265.73	1199.01	1234.8	1424.58	1128.64	1093.12	1280.11	1241.48	1319.93	1397.18	1374.04
571	738.39	1.20562	255.055	184.808	209.788	173.096	181.94	135.057	161.344	186.452	148.689	197.239	197.464	191.669	166.987	190.559	172.319	183.693	186.064	196.486	183.414	209.329	157.055	163.868	183.559	170.144	178.635	177.964	184.191	150.18	194.256	188.538	204.632	202.423	218.752
572	256.263	1.23943	191.788	4386.94	5193.69	4576.08	4983.93	4815.47	4884.25	4775.67	4238.66	8066.66	7553.59	5833.31	5639.01	6021.84	6096.17	6781	5612.62	6492.31	6061.52	7408.43	4649.75	6385.41	6599.29	6208.83	6834.24	9979.48	7711.33	6515.94	9276.38	7220.06	9074.77	7203.95	9771.18
573	319.082	1.23943	180.438	67.7399	69.0556	53.0541	60.1736	60.7315	63.3882	68.4828	54.3976	63.7642	67.7797	56.6686	56.7439	55.2403	54.5617	49.5438	62.5284	48.22	50.0685	64.7777	49.295	52.673	48.1053	47.9182	50.7471	68.6929	65.7782	44.3199	70.1804	52.6888	63.0118	60.2808	48.1413
574	425.374	1.23943	216.485	192.503	229.776	226.39	285.306	223.799	231.779	249.825	197.074	261.192	244.288	234.209	233.388	225.234	246.877	215.362	243.199	208.789	254.729	267.609	228.685	201.462	252.938	259.3	237.281	262.32	237.697	243.271	262.335	270.402	271.353	272.047	229.108
575	511.275	1.23943	212.454	353.333	358.395	330.727	375.205	293.009	331.566	351.459	305.797	383.733	336.599	324.619	324.38	361.729	362.326	327.411	344.088	297.915	363.097	348.56	334.013	307.918	332.067	342.407	317.839	396.118	308.834	331.687	380.055	341.469	385.184	400.398	381.121
576	589.538	1.23943	258.897	209.326	205.694	212.323	222.181	217.677	203.831	179.952	183.907	268.821	266.766	222.558	259.01	219.365	268.676	227.29	241.465	199.856	226.055	268.503	202.495	176.034	261.979	215.971	220.403	264.698	204.279	193.57	272.564	244.636	266.493	241.021	254.693
577	591.526	1.23943	264.177	508.257	570.501	427.721	566.64	450.616	523.294	530.732	472.361	634.96	649.159	521.352	523.447	551.775	550.579	577.18	552.131	493.119	547.609	606.227	429.222	501.188	607.479	554.601	547.635	609.178	514.581	446.717	591.389	520.725	635.164	579.818	653.1
578	626.447	1.23943	251.867	14193.6	18396.5	16028.1	16144.6	18320.4	17584.1	16695.3	14251.7	23811.9	22164.3	22847.9	22848	23607.4	22421	26504.5	18070.3	28557.1	22613.4	23862.4	17248.6	24261.6	22556.6	22362.2	24130.1	33022	28929.5	24977.8	29443.5	29071.7	29306.6	21227	31787.5
579	958.663	1.23943	309.748	217.806	259.741	187.068	286.453	180.249	209.984	292.844	184.628	282.616	273.901	233.884	247.989	244.341	243.315	231.378	255.734	221.598	226.302	287.091	185.798	219.451	276.933	216.714	264.945	264.559	230.051	186.304	279.374	251.896	296.758	292.82	288.125
580	467.363	1.29302	221.657	6194.09	6257.08	5557.82	6527.58	5876.42	5918.76	6329.82	6013.68	6582.4	6629.35	6273.86	5912.24	6150.22	6628.4	6124.74	6409.27	6470.58	7936.63	6615.25	5483.95	7533.25	8952.61	6344.19	6652.62	6612.22	6064.57	5682.88	6716.51	7286.35	7152.24	8131.61	8791.56
581	481.253	1.29302	208.401	668.864	590.153	526.278	646.429	573.155	584.612	662.588	575.498	639.438	650.657	594.681	587.263	581.429	608.796	585.906	581.8	541.912	670.387	655.642	547.404	586.543	626.744	579.029	595.562	657.721	600.391	571.686	601.944	584.869	611.07	666.024	587.903
582	600.475	1.29302	242.604	1087.19	1143.08	1017.25	1238.88	1245.33	1184.15	1223.64	1512.31	1390.65	1361.36	1419.95	1211.1	1351.05	1407.25	1284.71	1216.72	1991.44	2434.47	1364.55	1121.7	2491.86	3109.77	1309.67	1567.11	1639.85	1408.43	1363.33	1597.94	1499.12	1650.69	1646.84	1495.01
583	659.597	1.29302	268.802	108.744	116.208	101.058	156.167	106.945	113.3	119.903	100.627	142.026	157.927	102.952	102.513	122.146	120.298	117.947	126.04	98.5523	128.493	150.064	107.677	116.081	127.016	135.488	128.759	114.778	107.602	102.549	127.023	105.821	141.024	136.782	136.901
584	840.709	1.29302	304.244	470.086	562.258	438.968	545.512	496.054	518.574	537.554	447.737	629.948	596.515	563.11	529.04	553.752	585.187	526.964	559.952	483.603	507.764	573.602	501.64	516.453	529.42	525.168	522.685	579.994	509.894	476.03	603.006	503.552	611.752	613.246	580.297
585	854.467	1.29302	272.725	166.47	163.735	129.801	152.475	170.383	172.581	173.593	115.896	209.457	183.59	141.321	162.526	133.943	211.661	155.372	172.367	135.526	171.233	169.525	127.947	159.626	154.05	147.437	170.103	219.344	161.565	126.135	179.771	173.154	185.565	191.928	218.066
586	163.128	1.32683	161.611	397.005	440.338	405.736	427.037	410.1	423.229	447.817	428.996	400.308	478.279	407.198	422.248	424.607	471.252	389.882	432.892	419.635	431.13	439.817	418.746	442.13	468.624	451.595	448.071	452.213	461.195	431.485	450.774	448.042	433.253	467.956	465.6
587	623.414	1.32683	245.132	304.432	314.404	302.029	334.283	305.353	289.135	311.216	251.738	405.608	353.155	343.466	320.07	353.322	339.764	355.285	330.14	370.745	341.264	424.166	305.642	363.332	405.727	351.66	395.464	476.467	453.406	384.038	451.365	418.802	469.806	421.981	496.837
588	740.656	1.32683	293.729	3339.9	3600.99	3154.04	3746.65	3192.85	3391.95	3539.38	3140.7	3720.49	3784.01	3402.65	3393.83	3497.92	3729.37	3372.43	3620.99	3281.33	3660.88	3725.49	3249.63	3389.12	3759.67	3444.13	3512.63	3763.76	3290.37	3102.37	3726.41	3430.13	3808.88	3911.14	3548.24
589	776.631	1.32683	289.718	173.183	169.421	126.028	173.377	166.175	144.351	178.356	128.644	177.342	148.403	123.354	151.561	159.586	193.502	143.379	175.198	134.759	152.913	168.718	139.97	141.058	174.694	151.923	172.511	155.869	149.572	148.207	186.039	158.508	182.345	200.126	177.984
590	261.215	1.36063	175.544	45.8873	64.5502	59.6863	61.6775	58.2055	56.7294	75.8246	63.9406	70.2884	69.2108	73.1033	59.796	62.3883	63.1623	63.6355	48.9146	55.764	54.9203	68.3097	67.3555	67.0579	51.7055	46.983	58.4974	60.206	53.9558	64.21	63.2233	72.1084	53.0152	70.9036	64.7151
591	437.247	1.36063	201.537	643.647	485.646	469.571	487.588	455.354	474.944	516.765	455.422	526.577	524.735	446.929	462.474	522.624	522.23	484.701	498.286	397.898	469.174	539.214	466.853	481.5	515.108	488.139	459.896	521.482	471.004	447.153	522.722	480.104	544.161	548.88	481.031
592	564.432	1.36063	238.824	7880.31	8314.15	7221.59	8461.73	7432.71	8013.32	8418.48	7530.81	8630.18	8694.79	8114.1	8048.24	7961.12	8631.37	7843.59	8372.5	7501.53	8350.72	8772.5	7415.23	7936.65	8478.36	7898.62	7974.53	8898.96	7580.52	7016.74	8563.23	7666.75	8715.05	8797.42	8321.32
593	737.402	1.36063	247.021	509.904	454.266	380.28	516.08	444.455	466.857	482.948	384.447	479.494	504.296	410.469	467.894	467.645	492.503	471.788	482.288	357.523	450.021	509.488	420.505	419.161	448.368	411.78	478.746	523.277	399.201	398.021	521.771	462.424	508.856	553.856	479.405
594	799.427	1.36063	262.619	263.566	174.187	146.583	217.822	162.434	187.559	225.496	160.079	235.032	212.383	173.794	190.539	208.909	225.253	196.756	231.78	155.796	188.273	214.445	135.618	193.311	191.563	191.33	203.34	224.853	198.595	159.211	227.287	247.063	227.491	250.625	266.175
595	818.599	1.36063	294.468	294.457	255.385	193.78	268.074	221.554	222.695	231.989	212.796	316.243	280.476	246.423	239.975	256.542	277.382	234.536	243.86	230.311	267.49	309.052	193.438	222.142	247.161	220.412	234.974	289.043	238.872	199.832	268.636	260.2	271.249	310.457	261.239
596	843.636	1.36063	298.054	1068.79	1094.46	821.688	1239.73	904.613	1036.88	1107.55	823.745	1318.39	1227.13	1036.99	947.521	1158.55	1226.09	1005.63	1153.5	859.676	1163.56	1238.37	904.57	943.471	1224.64	1043.4	1126.41	1163.3	1000.79	897.498	1126.22	948.207	1314.87	1280.35	1067.46
597	885.478	1.36063	278.979	215.755	237.783	151.003	280.07	234.381	227.795	269.015	164.328	282.591	293.606	246.659	230.566	237.163	285.398	211.444	260.859	191.34	280.254	333.558	147.111	221.046	291.053	259.446	210.599	352.892	181.746	177.597	321.498	262.988	313.205	296.702	329.159
598	898.498	1.36063	287.777	194.83	177.874	126.134	185.194	143.166	157.114	184.795	155.191	198.359	237.579	166.652	171.323	159.758	166.958	159.56	138.117	185.036	222.971	212.713	153.477	185.511	168.182	190.211	174.122	239.111	180.351	183.878	197.449	230.201	239.223	199.233	265.326
599	903.569	1.36063	301.443	549.394	453.053	383.573	454.482	429.877	402.752	425.198	325.95	522.409	474.683	449.719	473.99	473.588	516.954	432.724	445.337	471.161	467.239	518.726	363.797	446.006	486.585	423.221	447.659	603.134	503.69	431.949	521.27	585.003	603.659	450.153	537.586
600	978.751	1.36063	320.52	4473.38	4657.76	3398.27	4700.05	3708.08	3978.44	4427.97	3483.32	5052.6	5091.87	4151.83	4191.64	4179.36	4684.25	3951.96	4714.25	3731.09	4277.92	5062.77	3926.72	4078.93	4620.36	4354.21	4278.28	5134.35	3931.93	3495.78	4958.23	4164.48	5041.34	5388.72	4893.37
601	221.183	1.39445	172.089	52.0049	66.5571	59.733	67.1336	66.7912	50.1837	60.6462	57.1819	73.4302	65.0266	56.616	62.3882	49.0985	58.5249	75.2611	62.8737	58.061	62.7516	55.3869	57.7128	59.6558	65.844	68.9888	60.1847	62.6003	60.7122	67.1751	75.3099	68.7542	62.0998	55.6782	64.0293
602	475.408	1.39445	227.258	326.811	353.297	265.721	351.172	283.95	308.955	360.808	273.876	369.582	396.801	313.822	321.501	288.797	334.991	297.631	363.393	316.896	351.011	397.936	276.302	311.279	359.393	343.645	297.893	392.479	289.568	285.62	351.914	346.535	394.12	372.866	360.99
603	549.393	1.39445	232.029	413.966	377.136	352.648	452.292	334.144	381.064	354.279	366.627	403.45	420.579	371.08	368.384	370.016	411.286	372.109	372.885	354.045	340.316	422.534	311.453	401.585	372.497	330.472	354.755	385.995	384.193	367.619	393.605	364.749	445.732	444.203	374.236
604	649.456	1.39445	248.984	750.333	781.886	643.575	753.778	685.679	652.933	770.232	676.796	827.192	870.074	664.556	722.157	729.645	777.691	680.837	742.833	735.984	774.104	884.962	592.671	763.183	772.286	717.612	759.948	933.313	798.338	706.107	882.168	737.312	931.116	865.354	877.095
605	652.513	1.39445	255.668	1681.07	1693.84	1462.12	1720.33	1572.54	1585.01	1746.77	1459.39	1972.26	1974.89	1754	1635.14	1731.17	1879.28	1839.52	1796.56	1742.34	1854.33	1990.31	1543.88	1823.94	1925.61	1969.59	1906.44	2368	2017.22	1855.29	2261.83	2086.05	2170.68	2139.07	2235.42
606	655.371	1.39445	235.281	2687.28	2665.27	2241.88	2692.35	2420.86	2528.85	2670.63	2251.54	2726.67	2777.53	2484.46	2459.68	2505.64	2712.99	2429.95	2737.79	2256.73	2609.17	2676.33	2352.49	2431.22	2653.67	2412.38	2496.55	2741.99	2410.07	2187.86	2665.83	2515.57	2670.84	2838.52	2745.18
607	807.422	1.39445	258.629	212.409	236.085	151.752	222.869	173.97	191.529	203.219	145.611	228.183	214.432	202.754	203.769	201.257	234.789	190.217	196.872	155.008	198.112	210.08	166.78	176.659	220.348	175.847	200.184	267.489	212.33	180.307	216.923	189.552	193.884	241.587	213.212
608	900.497	1.39445	285.248	138.769	119.919	124.049	164.594	107.189	105.236	122.939	99.944	150.326	174.36	127.932	121.479	121.491	130.625	150.814	118.038	119.931	138.712	181.097	91.9973	110.478	162.849	138.289	147.371	188.6	134.866	125.54	184.545	160.397	194.729	173.285	180.214
609	343.177	1.44803	184.679	1549.25	1155.96	1100.19	1219.85	1086.91	1129.63	1201.8	1054.96	1316.37	1182.85	1182.91	1145.77	1109.46	1198.09	1107.92	1251.87	1062.56	1156.83	1159.23	1038.04	1123.16	1138.7	1141.68	1149.91	1181.32	1039.03	1146.61	1204.85	1105.63	1195.8	1254.82	1124.19
610	566.401	1.44803	238.804	680.565	673.976	578.927	681.805	582.652	610.16	739.932	575.313	705.658	711.852	652.238	609.998	629.046	658.88	637.772	665.867	570.126	644.452	658.722	566.175	640.048	667.258	646.821	645.45	653.911	647.125	587.743	705.981	613.591	719.175	703.924	663.743
611	611.417	1.44803	242.507	737.699	646.47	579.002	667.272	618.082	645.674	668.68	588.146	728.551	725.143	624.162	640.517	669.397	668.163	650.747	654.148	604.158	666.676	667.821	609.084	620.742	683.595	697.373	652.553	672.393	628.826	600.099	696.702	642.429	689.875	721.151	672.707
612	621.576	1.44803	265.205	589.424	688.374	597.251	830.894	654.105	682.669	668.213	572.859	709.715	776.655	664.022	681.844	663.999	722.842	630.139	681.328	608.655	741.737	744.603	593.483	694.191	751.987	731.377	678.749	822.219	681.737	645.882	787.412	729.458	799.788	842.631	755.254
613	828.679	1.44803	304.315	807.7	818.082	622.029	814.591	643.345	771.784	827.714	637.961	949.236	956.026	698.354	648.94	835.872	836.505	634.314	837.654	615.339	845.225	968.252	640.05	664.511	958.133	817.11	776.516	929.442	640.993	596.932	811.233	688.265	928.733	1002.93	842.859
614	839.481	1.44803	267.627	549.022	487.767	364.979	471.702	454.849	449.493	480.813	395.26	634.953	554.84	507.765	437.084	460.774	510.638	472.651	552.733	445.645	546.369	595.176	373.22	520.737	531.152	483.164	467.725	614.105	448.444	430.313	622.358	544.299	547.35	593.908	612.25
615	383.244	1.48185	197.85	334.019	381.267	349.523	395.072	363.627	405.065	407.123	354.935	414.495	365.629	374.803	390.322	387.786	402.66	355.838	365.972	363.272	362.806	416.076	333.521	346.343	402.472	407.313	399.745	431.994	380.517	376.22	384.035	349.858	430.869	387.308	394.919
616	497.282	1.48185	206.743	1208.66	1188.81	1024.97	1256.19	1131.89	1098.53	1148.38	1069.12	1289.57	1286.11	1187.61	1120.45	1124.82	1273.28	1116.88	1260.03	1120.18	1225.35	1283.59	1080.02	1132.64	1184.93	1125.27	1175.41	1228.03	1177	1066.61	1246.61	1117.63	1299.73	1322.94	1222.48
617	507.378	1.48185	229.685	395.67	327.561	247.822	327.989	312.175	330.599	352.183	305.66	331.638	336.61	296.752	294.128	307.335	325.591	321.107	313.936	304.456	285.721	338.409	287.026	331.729	359.39	307.016	351.555	382.377	309.636	308.117	384.13	310.644	344.891	338.833	369.891
618	519.446	1.48185	236.54	490.453	613.692	542.617	600.14	505.768	556.16	639.673	516.094	584.58	607.921	529.294	581.931	556.152	653.773	538.56	640.597	547.316	637.553	622.866	557.348	536.715	641.011	602.991	545.094	613.333	580.36	561.258	626.199	582.946	596.458	650.592	617.745
619	531.478	1.48185	250.124	178.944	162.307	96.1414	199.101	124.648	133.148	183.175	158.231	216.286	216.951	151.022	142.686	179.583	151.033	134.755	198.196	171.843	156.304	209.004	177.716	193.974	195.548	176.672	144.037	178.367	183.177	209.029	146.836	183.831	115.411	176.391	166.93
620	669.512	1.48185	263.481	772.309	833.329	736.376	846.48	738.037	854.824	880.018	754.054	937.75	901.393	799.196	781.396	845.624	851.679	738.4	816.305	707.545	815.366	860.817	689.663	763.577	857.723	823.38	775.117	897.627	716.64	718.344	862.509	783	859.21	943.75	857.808
621	712.67	1.48185	281.292	526.266	688.603	592.047	711.52	634.159	632.706	680.205	549.661	667.416	693.653	634.262	619.581	631.77	686.18	600.134	653.436	575.579	630.489	723.701	601.7	625.589	664.132	656.895	608.552	705.993	612.297	582.489	678.812	648.953	673.37	711.563	623.294
622	846.695	1.48185	310.329	565.627	510.352	376.855	580.218	492.514	464.059	497.868	418.335	571.704	585.431	461.732	492.796	501.682	497.1	471.14	518.033	419.224	528.26	603.486	411.015	459.676	548.458	478.384	472.607	559.636	461.638	442.157	599.249	475.806	603.883	580.968	580.475
623	892.555	1.48185	292.817	219.881	251.093	169.24	221.748	213.392	211.916	236.616	145.321	268.697	230.018	225.289	247.792	246.153	278.578	245.269	251.923	249.881	238.05	279.68	204.354	226.875	210.26	222.817	213.332	360.169	229.825	265.093	267.743	263.229	270.17	267.131	269.448
624	369.202	1.51567	190.428	2032.26	2327.71	2289.91	2538.37	2230.54	2358.63	2443.41	2212.07	2482.67	2536.52	2404.63	2421.69	2223.41	2411.2	2274.29	2440.79	2277.56	2336.05	2492.47	2285.23	2202.03	2437.07	2340.74	2332.39	2401.68	2287.21	2202.63	2307.96	2339.81	2526.56	2606	2387.88
625	509.352	1.51567	231.068	1544.09	1393.17	1264.79	1402.9	1304.55	1386.25	1481.22	1302.32	1544.72	1494.96	1322.45	1390.62	1352	1395.97	1359.09	1439.97	1291.76	1485.06	1452.62	1293.92	1336.6	1482.8	1325.08	1382.21	1533.82	1368.39	1256.35	1403.29	1380.39	1448.18	1599.84	1396.96
626	672.527	1.51567	259.497	6189.85	6749.36	5928.23	6969.54	6158.54	6412.38	6614.93	6189.39	7021.62	7167.7	6272.43	6226.38	6387.29	6987.6	6216.23	6723.29	5998.28	6595.35	7073.87	5978.08	6246.81	6684.28	6426.88	6325.99	7212.91	6144.9	5850.09	7110.05	6432.4	7109.56	7308.21	6812.57
627	770.525	1.51567	279.616	354.845	218.718	218.912	208.391	224.435	210.567	229.558	235.083	273.16	276.433	238.212	229.182	252.045	267.502	210.731	231.45	225.887	246.112	260.236	224.445	219.024	261.01	223.797	247.432	271.412	226.925	251.715	266.904	236.325	264.244	253.074	246.678
628	847.624	1.51567	298.031	567.148	517.337	380.725	528.021	343.28	469.685	473.665	341.665	573.556	633.841	416.001	403.123	510	502.551	432.963	492.401	410.549	499.182	604.268	380.706	399.287	541.101	472.38	531.02	660.885	450.296	385.404	551.576	463.67	672.914	587.782	623.596
629	335.277	1.54948	197.281	250.425	308.379	267.662	300.191	284.018	283.008	307.563	269.263	307.925	330.672	294.056	307.986	275.981	291.243	261.473	275.048	272.013	302.197	297.929	278.119	299.857	291.788	303.796	274.378	280.217	278.532	260.624	294.2	288.279	310.832	302.149	288.035
630	530.435	1.54948	244.687	725.817	1059.29	994.297	994.71	915.363	704.697	982.028	899.426	994.12	1371.08	651.826	873.552	910.033	950.46	693.05	946.676	1041.04	836.698	1268.68	1029.14	986.59	1049.67	1163.71	999.685	832.2	1097.49	1049.96	939.153	944.337	876.005	1070.98	989.738
631	535.289	1.54948	219.429	1320.19	1187.02	1028.09	1258.98	1079.91	1142.25	1228.23	1056.86	1277.02	1279.1	1085.44	1155.07	1198.42	1221.36	1169.96	1216.22	1090.69	1221.34	1255.82	1048.5	1147.97	1184.31	1202.23	1219.98	1308.15	1166.35	1091.72	1284.78	1175.26	1281.79	1335.53	1260.1
632	535.448	1.54948	243.26	394.792	404.451	362.227	447.03	354.952	406.738	431.095	334.043	433.816	445.822	388.591	381.924	379.51	473.537	387.791	423.607	402.693	428.105	478.819	380.427	407.279	395.976	394.238	423.279	458.485	416.958	381.046	450.199	399.851	487.957	454.039	427.86
633	623.437	1.54948	254.576	235.344	234.126	209.511	237.978	215.777	224.449	252.301	178.769	249.737	206.93	238.36	236.966	239.431	244.191	232.388	244.445	215.311	252.664	250.298	200.353	237.443	240.143	241.993	231.99	269.838	230.971	239.431	273.944	230.856	278.029	252.564	262.538
634	701.419	1.54948	256.631	459.465	406.412	293.281	425.167	342.358	395.446	431.747	348.992	452.148	395.527	378.116	341.618	374.532	403.847	347.572	422.367	316.797	389.716	423.536	364.819	360.796	389.158	387.933	394.601	417.696	370.114	310.678	425.851	398.001	423.597	398.485	391.285
635	711.357	1.54948	249.881	269.571	213.479	169.333	284.977	207.119	207.512	254.792	205.759	240.144	256.837	242.237	192.003	197.095	244.031	195.528	235.659	212.566	252.374	224.315	197.135	219.721	230.323	229.167	189.014	231.388	214.916	195.564	241.473	230.944	260.047	271.985	219.67
636	819.437	1.54948	266.431	376.091	350.408	297.495	408.269	318.584	342.962	349.315	284.874	468.709	444.727	334.165	363.987	352.297	419.632	371.032	356.561	350.323	360.558	410.246	268.065	370.059	343.63	352.64	413.378	572.562	420.161	367.631	579.914	448.607	516.361	467.62	586.47
637	119.035	1.60307	158.61	6.29351	1.97058	2.59064	1.78481	2.7023	4.85704	4.78242	1.55098	54.8576	52.6941	19.2267	20.9562	32.0884	31.4432	29.3654	11.491	31.2412	12.7674	62.6878	4.26996	9.03388	27.6732	28.6154	51.7996	348.527	2.47722	6.21417	4.73118	296.091	16.3326	358.358	692.386
638	137.046	1.60307	154.78	80.3502	65.063	69.4733	46.7674	75.3321	84.3502	68.5302	63.3761	527.555	498.237	188.003	178.688	346.291	312.656	366.225	156.301	272.111	182.145	601.142	124.994	153.982	265.215	267.574	416.28	3523.93	46.6766	116.237	132.276	3132.49	190.617	2918.2	6778.17
639	316.318	1.60307	202.324	590.974	2048.17	1679.61	2482.7	2030.04	2004.08	1589.48	2163.12	707.48	641.773	559.544	546.34	1796.98	2226.76	2523.94	1849.28	578.499	559.505	656.595	549.11	1905.98	2079.92	2400.61	560.422	620.74	571.63	2515.73	2577.32	1907.56	2655.34	1840.8	2077.68
640	480.414	1.60307	224.347	860.797	923.102	812.986	968.405	855.501	913.376	895.212	829.091	976.488	975.384	775.913	831.769	898.485	968.687	883.942	934.155	883.414	948.452	982.395	817.639	847.587	932.469	923.408	947.555	950.936	857.765	824.147	918.616	875.832	982.888	1038.79	900.862
641	489.389	1.60307	228.493	176.304	166.071	177.689	204.858	182.27	208.975	181.564	155.939	169.083	206.645	178.07	164.012	179.863	192.086	181.106	210.348	150.799	178.557	222.956	184.043	193.154	204.297	197.317	189.557	195.9	156.069	153.182	184.119	178.688	186.19	187.772	189.328
642	505.261	1.60307	212.519	404.349	366.268	301.555	398.873	329.535	337.831	388.343	330.691	352.792	386.616	347.204	340.058	338.267	374.991	344.408	364.528	319.177	348.632	365.392	316.751	339.598	372.578	374.082	341.318	375.542	318.515	316.148	350.795	355.073	370.583	396.151	364.726
643	610.471	1.60307	247.959	215.031	208.061	186.946	231.981	180.917	186.927	225.205	174.007	210.646	230.855	203.022	214.013	216.923	223.349	178.56	205.763	177.686	189.543	235.792	198.809	187.927	218.281	186.614	225.029	226.148	185.05	181.586	198.347	202.937	219.645	228.238	193.161
644	649.45	1.60307	248.984	895.555	887.225	793.548	975.765	771.161	813.097	875.179	786.421	1079.41	1097.31	812.25	862.302	950.528	950.524	877.164	913.598	913.25	1036.18	1057.65	840.544	941.245	1156.38	896.659	921.575	1135.79	994.579	911.586	1142.47	993.494	1214.21	1145.21	1024.46
645	767.428	1.60307	266.729	253.058	248.415	205.855	281.542	225.555	247.403	243.069	235.046	251.746	243.869	251.059	230.014	241.638	242.445	235.924	229.785	222.804	245.742	263.116	232.345	243.312	224.517	224.397	258.733	273.755	213.836	196.07	269.492	239.036	261.817	270.873	219.502
646	843.5	1.60307	289.318	337.536	346.299	236.371	330.999	281.159	295.626	346.271	248.196	403.204	381.775	350.794	304.239	357.831	379.909	356.263	365.615	307.68	349.976	392.204	280.715	297.988	324.013	357.733	368.561	509.117	383.239	350.193	508.241	423.025	512.398	436.774	485.01
647	465.392	1.63688	223.117	1349.92	1504.73	1433.49	1690.04	1479.27	1420.63	1538.1	1397.8	1659.78	1660.42	1437.63	1471.03	1541.67	1638.12	1477.4	1629.75	1532.69	1440.26	1656.78	1478.77	1552.23	1645.42	1549.64	1520.06	1599.41	1462.6	1520.55	1585.84	1590.2	1606.49	1667.91	1577.82
648	513.318	1.63688	219.662	419.489	416.404	340.731	450.809	402.505	373.003	421.191	391.985	441.658	387.952	392.246	412.185	404.558	420.28	415.559	380.656	371.288	406.205	407.987	392.159	382.632	423.523	392.69	410.695	392.146	372.419	376.343	415.677	385.069	439.699	463.262	406.411
649	579.471	1.63688	252.304	684.599	849.153	691.248	875.564	712.285	772.713	778.214	657.421	872.749	903.487	804.893	787.285	791.001	817.854	766.284	886.183	703.778	810.828	912.101	690.739	787.398	791.034	763.426	834.751	843.574	728.496	677.194	864.212	665.184	942.509	907.731	745.248
650	668.487	1.63688	263.489	500.547	399.006	352.865	444.346	384.281	389.135	422.113	318.037	414.453	413	358.351	391.799	394.182	390.33	334.548	399.792	378.449	389.435	425.89	359.666	367.667	426.832	356.542	392.731	384.365	334.405	343.427	420.388	408.934	452.395	400.004	343.512
651	740.665	1.63688	286.175	281.375	352.044	314.867	380.366	317.862	344.957	363.992	354.782	408.953	354.365	366.845	353.87	387.196	378.515	361.797	392.978	337.538	383.214	404.989	323.886	328.689	374.868	349.44	383.105	404.494	353.621	313.58	400.539	345.468	383.552	395.554	376.815
652	743.43	1.63688	255.023	5482.45	5020.29	4166.12	5116.05	4239.55	4544.45	4876.03	4096.29	5353.27	5537.62	4633.03	4643.31	4778.43	5061.86	4632.11	5067.55	4379.22	4843.87	5292.81	4222.53	4589.49	5066.87	4679.41	4757.3	5453.04	4556.46	4350.06	5512.33	4978.63	5423.43	5386.27	5245.29
653	865.564	1.63688	294.204	240.523	269.947	188.725	244.812	220.179	213.722	206.563	153.908	307.553	280.214	254.493	237.83	264.738	242.129	282.971	227.215	288.193	288.663	293.518	207.452	295.189	261.289	252.661	296.475	365.974	291.021	220.314	320.667	340.334	325.687	287.012	324.456
654	909.548	1.63688	296.467	470.846	386.313	285.426	408.549	358.851	358.274	375.996	268.655	446.772	421.042	444.067	397.347	383.411	427.497	405.788	372.944	411.288	398.151	528.203	326.877	370.804	378.822	397.233	393.27	539.596	414.912	354.906	436.34	468.429	485.04	433.252	508.257
655	288.288	1.6707	193.864	4519.83	6591.53	4394.67	7271.03	6459.99	5431.09	5561.29	5633.99	1684.49	1413.29	1266.63	1215.5	4992.94	6990.85	6854.53	5363.46	1318.56	1293.22	1661.55	1280.05	5655.54	6025.6	6737.26	1260.04	1466.31	1371.86	6315.7	7439.99	5678.56	7290.22	5774.28	7073.9
656	543.43	1.6707	234.882	155.471	193.218	172.718	188.931	158.436	145.472	188.01	163.016	193.334	201.729	168.451	153.077	190.88	204.567	188.39	187.567	162.299	178.138	182.341	155.244	187.629	201.058	144.003	182.549	200.096	142.29	165.512	182.661	173.164	149.022	187.373	192.714
657	675.361	1.6707	247.436	1557.39	1467.44	1288.28	1625.93	1371.77	1441.87	1500.08	1272.54	1620.21	1568.87	1390.49	1392.8	1412.19	1610.85	1427.41	1631.61	1344.98	1554.53	1571.85	1352.43	1411.42	1624.66	1481.84	1494.18	1616.76	1421.53	1238.76	1647.73	1481.16	1599.83	1641.08	1572.77
658	783.451	1.6707	274.406	676.522	598.166	456.417	619.339	556.199	532.232	613.498	494.06	647.705	667.511	569.082	579.215	657.324	626.145	573.689	606.308	543.813	593.759	688.089	486.946	563.656	614.143	617.054	579.207	704.476	631.245	585.653	673.942	617.971	728.577	701.142	661.871
659	867.489	1.6707	275.231	134.736	142.234	84.3833	126.591	96.9685	117.658	109.6	77.8504	155.555	123.427	107.728	109.826	98.2919	118.427	132.527	134.661	102.107	144.435	152.433	102.026	117.214	105.428	115.532	90.5692	137.456	124.601	85.2772	127.708	136.21	144.864	130.977	131.493
660	481.326	1.7045	224.336	901.492	817.867	742.38	853.21	777.913	801.594	834.301	741.406	886.951	888.615	766.491	780.59	770.761	902.518	737.037	880.876	760.371	826.202	809.206	737.918	765.064	810.562	818.865	804.127	851.839	744.536	721.897	840.641	800.365	891.679	912.412	831.94
661	531.41	1.7045	248.767	86980.6	113782	102915	115537	104202	109191	113318	103306	114227	115689	109652	108747	103503	113536	107816	113769	105202	106427	117392	104938	106897	113362	110742	109430	113163	108480	102553	112367	106788	115375	114947	109444
662	599.502	1.7045	257.467	1110.55	1542.98	1355.82	1269.14	1562.03	1308.39	1349.6	1106.23	2920.89	3135.77	2127.61	2028.74	2215.28	2191.66	2816.9	1686.05	3222.06	2009.29	2889.62	1455.08	2562.25	2217.97	2513.06	3101.38	5770.27	4855.37	3701.33	5711.37	4588.38	4783.01	3042.88	6156.97
663	859.452	1.7045	275.271	179.43	133.682	103.363	149.534	120.45	139.086	147.957	107.391	161.091	182.561	146.082	119.079	116.918	150.714	175.747	151.519	142.969	150.077	156.99	151.389	141.362	150.183	116.887	146.652	161.735	104.7	127.786	141.782	145.808	184.321	151.915	166.681
664	192.103	1.75808	163.295	40391.1	57349	53921.4	57150.4	54148.1	55840.6	57325.1	53709.3	57302.7	57333.6	56130.1	55760.2	54449.8	57127.5	56125.5	56616.7	53844.6	55266.9	56857	53865.7	54546.6	56266.8	55802.2	56840.7	56753.1	54913.7	53027.6	56728.5	55659.4	56595.7	57257.9	56154.9
665	286.232	1.75808	186.06	248.226	302.911	269.732	309.729	311.181	324.431	332.963	272.853	310.884	305.065	309.827	305.263	330.726	303.586	290.002	312.522	275.998	295.388	332.661	283.808	307.901	303.195	297.697	298.856	322.013	321.26	291.59	333.771	325.277	332.282	371.135	326.592
666	567.373	1.75808	234.639	182.162	169.559	153.557	188.006	188.294	156.01	165.817	162.423	188.879	184.636	145.048	169.438	171.938	197.631	192.463	172.448	150.451	151.4	197.987	165.667	187.473	183.701	162.451	178.721	177.533	148.283	160.539	181.702	166.533	212.345	192.424	194.209
667	647.398	1.75808	246.294	349.047	347.003	313.952	368.216	336.915	315.456	327.378	287.631	355.548	365.755	324.976	362.05	357.342	321.194	366.022	322.669	324.093	353.054	335.986	328.046	321.66	337.292	297.322	315.097	345.542	294.8	330.595	307.844	316.803	338.289	351.228	332.194
668	740.648	1.75808	288.703	1626.68	1930.05	1739.18	2013.66	1746.74	1892.91	2020.99	1770.19	2031.76	2100.21	1835.79	1817.15	1803.81	1965.25	1865.91	1959.65	1723.26	1953.32	2042.8	1701.52	1847.94	1928.7	1800.23	1887	1945.77	1810.15	1678.44	2005.78	1879.17	2050.55	2000.56	1972.33
669	752.741	1.75808	298.632	2466.31	3101.01	2800.97	3188.51	2731.75	2953.4	3062.85	2713.05	3256.76	3166.92	2944.71	2972.26	2813.29	3179.05	2880.74	3131.82	2870.46	2922.68	3198.84	2741.93	2882.56	3040.78	2957.79	3001.82	3062.73	2837.72	2677.46	3171.65	2903.07	3264.87	3212.74	3024.32
670	774.67	1.75808	290.988	196.125	143.688	121.688	131.052	115.171	121.032	142.681	145.155	153.333	146.161	106.683	150.421	138.871	186.789	149.988	140.743	138.547	125.251	160.645	134.783	126.418	146.122	138.937	145.985	151.48	131.249	128.006	170.399	126.724	162.044	160.401	156.09
671	829.542	1.75808	281.814	132.505	106.05	78.3985	90.3902	84.8151	90.7575	100.998	89.1481	115.168	124.052	87.3908	103.256	93.8183	114.99	98.439	111.825	99.1973	107.566	130.578	83.9428	118.596	119.878	102.464	96.4316	124.514	92.9029	95.7825	114.555	121.01	131.743	125.203	135.837
672	873.501	1.75808	273.917	333.137	229.082	215.778	244.343	170.335	220.411	247.823	153.763	257.214	263.641	282.323	258.63	198.721	288.343	230.903	271.399	181.576	228.284	302.236	203.788	230.694	253.918	232.288	243.416	318.523	251.809	187.471	294.731	257.678	297.078	262.64	287.198
673	475.377	1.7919	222.984	1442.47	1380.55	1086.14	1478.19	1147.65	1186.14	1421.72	1147.37	1477.64	1510.36	1245.76	1251.12	1256.72	1399.66	1269.62	1371.89	1211.15	1404.64	1472.02	1232.2	1249.95	1428.19	1222.3	1215.87	1435.32	1198.08	1163.05	1349.49	1239.99	1463.56	1462.7	1441.28
674	509.358	1.7919	229.661	672.763	640.669	579.125	698.283	573.351	594.524	680.272	593.51	697.758	715.464	618.215	618.421	644.412	663.331	607.715	697.755	571.117	655.037	660.653	582.341	632.192	682.705	629.778	625.567	686.35	616.585	564.86	671.811	636.377	679.137	635.509	699.785
675	603.535	1.7919	261.415	4284.09	5425.47	4879.07	5277.24	5143.54	5184.26	5345.54	4608.35	7661.99	8002.98	5975.4	5789.61	6166.36	6357.99	7002.99	6086.75	6220.74	5317.06	6961.13	4783.62	5933.41	6438.71	6211.29	6712.08	8950.4	7580.42	6669.71	9195.88	7679.19	8475.69	7933.91	9309.51
676	605.55	1.7919	264.039	2102.27	2853.03	2494.56	2435.42	2854.26	2734.09	2562.9	2149.58	6200.8	5006.49	3899.66	3623.58	4502.3	4433.43	5511.41	3526.66	4831.66	3492.24	5266.01	2819.02	4352.88	4267.9	4603.15	5094.97	7659.8	6045.04	5298.73	7342.82	6551.33	6775.15	5490.36	8296.61
677	659.593	1.7919	276.584	240.984	309.755	253	330.43	289.123	307.684	301.503	258.05	350.395	321.744	272.721	258.122	287.238	289.887	275.984	335.53	274.48	274.406	307.896	261.507	262.941	275.725	268.43	298.741	335.731	282.848	240.51	310.662	305.685	345.213	344.451	298.942
678	778.414	1.7919	257.468	808.993	815.81	656.979	866.45	605.05	688.985	815.295	647.299	841.566	848.731	723.791	715.182	751.68	809.801	727.334	809.314	689.144	842.821	831.044	685.449	729.252	802.161	747.348	751.837	929.907	729.02	701.018	976.793	797.649	935.862	954.829	928.126
679	794.425	1.7919	266.57	1090.59	868.464	772.394	1037.3	776.646	809.258	913.47	768.884	1034.05	1004.65	939.959	862.84	896.995	993.629	920.548	952.71	856.992	916.349	1096.23	853.899	859.731	931.637	897.647	920.815	1105.81	934.332	819.981	1199.05	988.832	1060.12	1052.4	1212.2
680	799.544	1.7919	285.791	2012.58	1889.17	1568.49	1906.81	1681.58	1801.28	1840.94	1486.63	2401.18	2377.98	1955.67	1969.29	2125.2	2247.34	2133.97	2064.08	1964.46	1935.28	2374.71	1650.64	1985.48	2129.17	2112.15	2219.56	2849.3	2259.56	2022.06	2793.08	2454.91	2802.42	2491.75	3105.46
681	505.385	1.82572	222.616	321.764	322.763	284.688	356.863	339.69	323.185	354.915	314.347	357.408	358.733	319.002	329.867	329.742	361.442	307.479	365.484	290.064	336.622	392.091	305.762	303.598	324.458	309.658	322.205	380.892	316.764	299.366	314.81	342.193	343.515	377.417	390.982
682	573.489	1.82572	252.365	400.772	539.147	396.03	463.682	442.435	482.658	471.823	393.907	578.464	638.5	456.285	479.796	497.864	546.976	503.429	542.033	522.909	423.924	564.223	407.973	480.483	467.676	476.678	479.958	655.424	573.572	487.278	618.236	596.636	595.327	579.074	651.748
683	575.504	1.82572	255.031	818.112	1064.92	954.385	840.189	1081.74	1001.2	915.201	758.506	2865.24	3132.17	1692.06	1609.95	1622.48	1636.66	2288.86	1308.67	2055.11	1293.62	2128.59	986.095	1705.03	1592.1	1732.26	2138.95	4160.28	3365.46	2870.17	3978.09	2873.54	3256.23	2581.88	4128.31
684	722.39	1.82572	249.809	1258.36	1135.81	1005.8	1150.68	1044.68	1118.76	1138.84	1006.98	1140.28	1177.3	1108.76	1086.18	1089.75	1202.13	1040.25	1170.56	1031.75	1122.07	1225.72	1023.12	1040.18	1217.63	1090.66	1158.71	1184.31	1031.17	1023.81	1181.33	1106.92	1195.7	1298.01	1167.9
685	769.5	1.82572	275.778	904.998	785.25	616.937	804.692	716.614	733.093	832.503	627.475	1175.95	1266.99	832.477	857.84	879.69	964.74	946.773	845.159	930.983	866.515	1072.91	690.995	853.06	927.096	909.718	980.704	1401.88	1181.84	973.503	1439.1	1062.38	1204.8	1167.76	1380.04
686	799.447	1.82572	267.843	1514.46	1257.73	1013.63	1349.81	1090.25	1245.26	1266.19	1099.55	1463.08	1505.83	1228.82	1287.75	1309.18	1434.89	1243.48	1374.88	1156.39	1290.81	1464.6	1087.86	1237.15	1335.42	1314.35	1380.83	1681.53	1362.03	1216.59	1758.45	1405.89	1637.9	1554.54	1655.44
687	831.538	1.82572	285.605	183.526	122.051	115.9	159.419	116.37	147.184	159.896	124.999	146.271	157.725	152.921	116.063	164.115	142.722	139.16	149.108	153.988	153.66	151.124	119.952	167.537	159.701	151.732	124.994	181.752	136.08	132.256	179.954	174.079	167.108	163.184	159.982
688	854.474	1.82572	275.296	426.826	444.997	339.531	475.488	357.328	409.041	364.521	306.057	484.914	494.304	425.479	409.851	408.212	456.225	420.084	435.954	382.798	440.223	498.86	355.123	387.171	446.828	389.647	451.211	537.105	498.066	418.844	545.933	456.845	547.888	463.452	592.6
689	463.393	1.85953	226	316.337	338.903	286.675	360.62	308.988	282.649	309.018	294.621	348.39	373.164	308.625	299.097	305.856	342.072	298.37	343.142	329.922	314.755	352.302	286.971	325.518	323.688	364.316	340.161	337.805	303.205	285.849	359.962	334.541	341.523	380.566	364.777
690	524.326	1.85953	219.543	1085.02	1000.35	863.267	1030.43	948.858	933.162	1022.65	881.527	1095.42	1039.7	938.105	927.143	1016.44	1025.65	963.408	1039.19	950.579	1002.47	1052.6	855.731	946.924	1013.25	950.708	957.116	1044.61	931.895	896.354	1061.92	944.44	1044.21	1058.72	1053.98
691	577.521	1.85953	259.019	14755.9	20351.1	18643.7	14032.7	21310.6	19016.9	15659.1	12599.2	56088.2	51397.2	33025.2	31150.9	36557	34047	46144.1	26518.2	44913.2	29691.1	45920.1	21467.9	38724.3	34318.5	40314.8	47229.6	73340.3	63831.5	48060.8	70939.3	57328.9	62040.5	39018.7	71766.2
692	577.764	1.85953	257.683	20.8867	57.9185	51.4591	13.5974	77.7854	62.8132	29.0863	13.5861	617.206	495.472	208.787	192.88	271.223	217.993	426.611	118.851	420.534	184.744	410.345	81.9221	291.193	251.515	313.865	453.032	1019.83	813.015	450.334	962.147	621.983	759.127	280.078	929.432
693	577.865	1.85953	257.682	0	16.795	16.1708	0	17.9812	0.000217217	0	0	217.095	154.546	50.5117	77.6334	95.7283	53.5759	126.596	27.9463	122.358	45.8956	145.763	21.7117	94.6929	58.8332	73.8184	134.739	308.404	226.423	113.296	257.026	177.288	288.933	89.1008	305.473
694	577.953	1.85953	259.014	5.62071	18.8365	27.2407	0	25.7271	14.5366	4.65333	0	393.868	310.245	122.434	119.717	162.166	126.323	252.065	58.4656	294.664	99.0149	247.966	27.6613	182.862	137.478	205.176	278.724	685.061	546.009	297.297	627.064	423.67	490.707	163.37	622.266
695	578.084	1.85953	259.013	0	12.3243	18.1195	0	23.8484	0	5.74414	0	256.059	202.349	57.7628	74.6196	130.956	75.3484	161.227	28.3023	136.194	76.3147	177.312	22.3481	101.03	109.858	90.1665	151.619	400.535	271.478	144.447	347.111	208.672	368.526	113.281	344.32
696	578.203	1.85953	259.012	0	3.10742	13.5221	0	21.7452	12.7399	3.23451	0	132.822	136.743	48.0514	63.1769	74.4549	55.6772	99.8171	27.3356	86.9677	66.2258	126.781	27.9695	64.6377	79.0549	74.2746	102.487	228.677	170.132	113.846	179.828	144.132	248.106	75.6553	213.808
697	748.415	1.85953	257.647	623.992	601.709	479.972	699.153	522.086	610.004	651.801	519.624	667.828	644.056	600.196	570.44	555.008	663.962	622.207	603.061	510.735	612.69	671.718	562.671	623.494	606.134	542.088	607.669	671.832	549.256	497.745	617.092	608.341	642.391	633.94	674.467
698	771.515	1.85953	279.61	3970.27	3413.79	2948.13	2435.73	3438.32	3017.35	2608.05	2106.86	11477.4	10074.3	5648.74	5381.55	6683.63	6123.84	8577.12	4516.37	8596.94	5388.35	8607.98	3534.85	6594.07	6419.65	6979	8927.89	16120.9	13011.4	8872.31	15780.8	10931.9	12980	7145.62	15532.9
699	787.49	1.85953	282.06	1573.41	2016.62	1886.68	1523.08	2083.88	2009.84	1755.25	1407.98	5646.12	4837.36	3336.46	3156.51	3611.64	3331.75	4727.17	2503.53	4931.23	2954.37	3882.79	2177.27	3898.63	3450.12	4092.92	5010.3	7758.29	7462.34	5137.49	7872.23	6188.15	6080.22	3344.58	7689.25
700	805.456	1.85953	276.845	356.799	289.64	231.645	325.75	277.758	297.073	302.744	219.504	436.154	462.661	325.933	254.802	328.861	363.476	344.094	312.195	319.46	309.934	422.147	255.928	320.404	330.204	308.386	325.378	480.204	378.043	319.735	497.349	371.663	530.725	438.626	535.027
701	948.771	1.85953	323.054	85.6535	123.622	93.7875	122.136	87.09	109.047	109.476	71.9265	120.383	108.326	75.358	105.443	112.875	127.396	84.9311	133.306	114.439	118.226	131.191	93.1246	120.021	119.368	106.047	84.3785	111.929	108.674	78.646	122.421	106.265	124.129	135.765	81.9041
702	307.043	1.91312	179.119	14.573	12.0002	2.14367	4.9388	6.69498	9.0608	8.80675	3.50194	12.783	9.42145	6.37583	4.84954	4.19193	7.26573	6.83482	7.316	4.61057	15.688	8.96821	4.15331	7.326	16.0472	10.3064	6.91943	233.811	6.46502	13.142	6.38322	196.863	14.5054	38.3777	433.452
703	415.212	1.91312	204.854	29111.3	37612.7	34183.9	38457.9	34638.1	36091.5	37892.5	34453.9	37531.5	38686.5	35958.7	36252.7	34918.1	37609.7	35768.2	37479.5	34597	35777.8	38665.3	34907.1	35205.9	37763.8	36435.2	36378.8	37362.4	35747.7	34113.3	37290.7	35879.3	38424.2	37999.6	36719.7
704	447.347	1.91312	227.654	9965.28	12047	10827.4	12369.2	11274.9	11601	12226.3	10945.5	12207.8	12577.2	11532.1	11456.7	11457.1	12165.2	11647.3	12406.6	11114.9	11718.6	12396.9	11157.5	11687.2	12336.1	11950.5	12072	11930.8	11554.1	10751.6	12067.3	12433.3	12553.5	13154	13895.2
705	549.488	1.91312	252.621	2491.53	3117.05	2527.23	2997.83	2642.39	2759.65	2984.99	2375.81	4648.31	4812.9	3266.98	3159.8	3353.77	3497.12	3584.94	3216.25	3353.91	3303.08	4043.18	2612.55	3187.98	3247.84	3289.24	3569.21	5160.82	4020.2	3624.58	5083.35	4092.9	4697.68	4176.65	5072.09
706	550.39	1.91312	236.199	547.903	458.397	415.467	475.175	409.922	432.957	392.695	415.26	442.037	416.071	411.752	364.727	442.749	439.563	426.116	397.613	428.421	454.013	410.271	419.984	411.685	446.318	426.723	419.565	491.238	382.2	383.087	489.238	419.943	467.135	543.712	468.09
707	845.496	1.91312	276.625	367.014	303.908	226.64	309.554	252.336	285.204	288.565	240.028	322.952	296.011	256.937	275.036	281.599	298.601	263.797	314.948	275.186	297.828	334.36	239.021	252.265	311.552	264.291	291.866	328.127	290.753	250.493	337.507	326.941	317.533	347.02	379.104
708	339.162	1.94693	181.597	727.215	574.262	508.329	627.795	539.743	566.37	596.491	534.259	571.859	609.286	570.165	564.627	572.506	620.15	561.316	583.037	560.711	593.352	612.993	544.631	584.691	580.017	525.268	593.461	608.267	548.33	549.735	595.917	575.83	578.198	604.183	616.246
709	465.392	1.94693	223.117	386.435	430.631	399.048	465.405	442.676	425.427	441.058	410.457	437.898	455.284	420.116	415.261	443.097	462.237	417.558	448.451	408.617	430.534	486.517	365.128	436.383	430.781	457.01	425.866	470.906	430.589	375.336	449.755	402.59	457.328	499.836	423.658
710	677.563	1.94693	271.26	100.654	113.663	86.7085	96.2983	87.7635	110.637	114.867	98.473	114.847	102.683	96.3002	84.8732	94.713	89.2894	102.828	113.111	104.447	119.647	125.784	67.0584	93.7181	100.611	119.345	114.638	110.532	96.0587	92.7108	124.784	93.3099	107.514	125.255	140.653
711	837.445	1.94693	268.935	156.113	148.034	95.2496	150.248	117.364	133.397	155.914	116.741	158.992	157.573	108.157	102.824	131.79	164.22	107.779	127.252	131.326	130.315	130.649	115.181	126.451	146.092	132.303	113.068	170.408	115.345	99.8604	167.864	131.039	160.574	170.444	147.605
712	495.269	1.98075	218.43	1679.85	1551.22	1350.3	1646.13	1435.23	1495	1605.69	1351.35	1736.84	1661.01	1408.46	1514.36	1496.84	1655.53	1472.63	1543.78	1470.46	1556.62	1627.08	1374.1	1533.01	1576.69	1492.38	1490.68	1651.93	1497.31	1406.69	1654.89	1526.37	1609.71	1638.43	1664.79
713	513.311	1.98075	218.224	749.288	795.788	722.022	833.549	693.987	757.77	803.096	673.669	863.344	833.271	758.118	751.897	739.572	782.128	717.607	777.771	727.143	767.177	827.863	719.016	755.38	815.893	771.852	782.651	838.729	769.977	702.768	839.593	736.551	892.151	863.618	841.338
714	569.308	1.98075	231.833	1846.5	1661.44	1501.84	1788.49	1452.17	1580.8	1774.37	1434.7	1757.15	1719.73	1621.42	1672.92	1584.76	1838.65	1663.67	1748.16	1552.4	1675.8	1770.39	1497.85	1582.91	1747.84	1550.37	1618.77	1728.08	1596.89	1505.37	1749.76	1626.2	1875.88	1829.89	1922.47
715	607.487	1.98075	249.339	3471.16	3388.44	2649.12	3780.01	2954.15	3147.32	3167.52	2698.06	3716.25	3741.11	2993.24	3035.83	2917.05	3583.85	3015.4	3485.69	2789.91	3000.62	4104.67	2900.77	3466.36	3438.82	3084.34	3376.74	3918.51	3016.66	2655.43	3645.68	3380.61	4099.35	4158.24	3968.18
716	712.597	1.98075	281.293	527.661	685.167	581.436	683.376	621.961	546.179	656.285	556.262	694.333	692.26	606.556	623.872	653.202	722.671	657.27	648.71	583.142	645.056	696.002	548.084	571.942	637.633	632.936	635.148	636.033	568.069	597.216	610.101	648.356	709.063	644.148	666.562
717	871.457	1.98075	271.352	189.279	147.528	126.054	163.851	177.864	151.236	159.707	124.154	219.07	177.569	144.36	117.519	184.738	206.886	164.613	174.224	162.773	173.046	203.104	176.544	140.894	153.538	168.659	160.824	191.042	131.134	130.998	205.439	140.506	212.298	199.273	181.792
718	988.648	1.98075	310.829	6281.34	7205.17	5580.82	7698.72	6072.07	6694.09	7352.14	5807.87	7746.64	7775.57	6920.55	6481.19	6588.05	7445.64	6562.45	7334.38	6125.61	6894.94	7895.1	6254.26	6513.07	7438.5	6771.09	6933.37	7825.01	6470.4	5686.94	7451.4	6817.48	7848.16	8065.87	7565.43
719	364.256	2.01455	196.675	88.5751	76.3772	82.082	78.2134	85.4177	86.0804	98.3296	84.3826	92.6971	103.593	93.2153	87.7159	89.7275	106.825	86.529	93.4171	88.4131	108.278	95.7119	85.1807	96.9621	91.1779	90.1456	101.205	81.834	74.2964	89.0202	101.159	79.4818	79.5315	79.429	113.716
720	491.293	2.01455	212.678	285.651	279.416	245.057	289.667	244.387	273.88	262.803	210.554	287.361	264.847	255.136	246.526	256.103	255.968	261.581	247.894	235.83	257.518	280.073	226.701	249.345	239.169	259.098	272.735	257.652	226.317	244.337	255.829	243.006	279.504	296.305	262.97
721	507.377	2.01455	228.274	228.428	235.523	223.036	233.342	190.742	192.159	211.731	190.937	251.395	195.478	196.848	230.134	207.622	242.09	227.792	235.94	204.61	254.135	277.452	188.856	216.029	204.846	216.8	210.304	255.131	214.479	197.223	238.224	246.266	242.932	240.504	247.276
722	515.414	2.01455	246.234	188539	228306	212500	233341	214904	221142	228292	211847	228366	233831	222897	220581	212101	228616	219595	228989	213593	215387	233018	213148	216379	227211	223340	221786	226101	221394	209677	225656	216157	230123	230028	216857
723	515.641	2.01455	246.231	1191.34	1691.81	1466.08	1802.1	1579.85	1627.18	1743.95	1504.15	1685.32	1713.26	1619.11	1633.41	1519.23	1711.8	1578.1	1694.48	1561.96	1550.93	1818.06	1557.93	1594.52	1691.63	1679.69	1648.99	1704.35	1652.44	1474.34	1696.27	1608.26	1770.6	1750.7	1569.47
724	681.487	2.01455	269.929	6364.42	6665.8	5882.25	6856.4	6196.01	6591.84	6836.81	5922.91	7244.09	7118.19	6595.89	6592.28	6660.06	6911.83	6355.66	6749.06	6012.47	6837.89	7170.34	5995.76	6197.42	6734.5	6371.88	6417.74	6741.2	6311.75	5781.21	6850.86	6315.53	7057.21	7160.43	6803.68
725	588.331	2.06815	226.041	574.168	517.313	501.661	570.279	507.35	535.314	558.414	466.13	550.963	578.305	511.799	499.934	576.794	584.631	493.848	567.799	474.563	534.548	626.081	454.578	534.104	555.516	511.631	516.038	542.331	523.526	517.728	598.328	522.975	592.439	587.954	566.568
726	642.497	2.06815	259.739	6728.97	7286.85	6338.16	7520.43	6556.59	6894.94	7252.24	6401.86	7354.93	7533.38	6805.87	6860.28	6633.63	7420.46	6712.65	7367.23	6546.83	6793.59	7833.85	6457.01	6897.11	7477.6	7013.51	6913.53	7391.24	6689.91	6233.02	7195.29	7114.29	7558.92	7649.88	7366.79
727	834.746	2.06815	309.18	1084.2	1445.06	1097.37	1498.98	1201.66	1345.77	1491.86	1135.1	1558.28	1536.13	1294.43	1304.75	1262.69	1504.66	1302.8	1492.54	1226.11	1311.02	1559.66	1213.75	1242.02	1426.08	1383.75	1254.24	1488.42	1249.57	1220.37	1512.62	1241.39	1533.49	1457.61	1415.88
728	504.372	2.10195	222.627	592.723	656.49	539.283	627.568	486.3	603.814	617.348	520.567	634.941	624.67	559.169	544.777	569.674	660.138	556.495	615.292	507.286	600.549	645.228	553.81	608.935	577.998	563.217	590.773	647.52	596.334	533.357	613.369	660.165	622.439	689.636	671.794
729	553.443	2.10195	248.519	1822.52	1462.2	1019.93	1381.35	1155.99	1102.07	1306.93	1176.19	1345.64	1636.13	1077.71	1210.22	1343.45	1322.24	1166.9	1513.73	1237.02	1296.34	1594.7	1031.5	1336.12	1316.12	1304.71	1284.95	1420.4	1200.62	1073.95	1362.8	1379.58	1422.92	1613.44	1390.33
730	632.55	2.10195	266.419	314.076	421.206	361.929	440.962	396.982	416.087	447.732	382.73	498.11	468.664	422.846	393.11	442.816	429.752	399.428	504.665	362.944	443.382	457.776	366.309	386.067	513.927	391.573	470.819	427.544	355.007	366.695	444.825	387.106	482.48	446.398	465.358
731	635.579	2.10195	272.915	248.614	266.148	218.785	279.973	237.02	270.462	272.859	223.299	269.709	323.013	254.124	247.642	288.97	268.394	209.912	268.632	253.707	259.631	325.073	203.565	245.055	290.154	252.054	243.89	324.066	231.585	227.756	302.204	293.011	303.604	326.213	312.623
732	653.319	2.10195	235.296	193.294	199.336	190.687	235.574	197.321	168.773	215.667	170.195	217.53	194.422	188.54	194.296	183.539	216.473	207.294	221.317	183.12	200.168	207.213	192.839	163.764	182.022	200.109	195.419	213.111	193.37	166.835	198.576	198.74	223.06	203.039	226.211
733	677.559	2.10195	273.853	127.243	149.3	161.691	149.387	130.796	134.132	155.5	135.323	156.475	139.991	149.69	145.835	152.145	163.532	144.285	174.378	127.614	157.577	149.07	116.043	135.999	134.977	119.849	115.088	171.176	137.493	137.033	182.288	152.479	176.787	188.116	166.129
734	351.282	2.13577	198.462	68.4526	93.2258	86.8332	95.5606	80.4373	85.4236	103.902	81.5305	84.078	93.0214	78.8274	88.7705	95.8009	90.5346	78.8984	86.5446	83.6224	94.3047	86.1334	78.1205	92.3576	100.922	79.1152	86.1523	96.354	71.9377	68.5592	71.3062	68.7002	90.5929	96.4318	106.661
735	685.49	2.13577	263.357	638.485	639.871	461.235	634.534	540.508	552.716	594.34	514.982	600.296	606.641	534.525	575.86	602.094	598.168	505.781	538.767	498.631	634.002	568.723	550.411	552.185	551.231	566.538	548.781	558.112	508.996	534.779	596.342	524.367	594.906	558.277	580.925
736	751.396	2.13577	256.303	379.351	324.602	269.767	326.306	269.41	283.338	319.025	252.576	324.676	352.03	301.689	267.971	310.56	392.718	285.729	342.272	288.606	329.168	361.011	284.478	324.778	336.479	305.534	285.592	348.964	323.454	266.553	346.635	298.816	361.336	347.032	376.846
737	841.617	2.13577	301.776	1975.57	2016.42	1429.99	2160.71	1480.77	1824.87	1969.22	1466.46	2237.48	2320.24	1743.83	1680.87	2055.96	2102.08	1679.09	2103.45	1539.44	1889.63	2304.65	1534.74	1624.91	2114.51	1884.88	1940.26	2276.6	1671.95	1481.96	2214.97	1985.35	2313.58	2429.58	2465.23
738	845.494	2.13577	270.189	260.54	252.515	169.38	254.331	162.86	213.266	224.588	200.611	260.151	267.413	201.204	197.199	246.865	259.782	201.797	224.111	192.353	220.813	244.944	185.873	178.826	236.53	249.478	244.567	295.253	207.709	193.14	266.309	274.882	247.12	259.003	344.391
739	948.763	2.13577	319.461	149.701	157.306	120.931	175.123	99.0554	124.725	164.35	124.44	173.19	166.036	123.827	128.598	128.112	154.852	142.648	164.75	123.666	145.815	167.051	131.102	136.65	169.36	170.018	145.397	139.646	153.7	107.28	159.815	146.838	160.157	164.969	171.304
740	368.259	2.16958	199.645	209.259	213.382	214.453	227.015	196.593	199.254	222.916	179.276	219.277	195.288	198.402	194.952	232.557	225.097	201.294	229.392	205.763	219.563	228.802	204.471	217.039	206.894	203.734	221.131	225.921	207.606	212.549	222.342	208.773	211.069	211.31	264.838
741	489.399	2.16958	229.905	566.664	682.956	564.665	682.669	543.934	581.943	627.562	593.732	740.748	680.79	590.454	553.996	635.472	619.951	614.815	638.222	563.855	607.574	683.366	520.645	640.222	629.369	597.817	589.008	647.783	547.043	587.496	669.032	593.043	664.667	725.975	677.52
742	593.39	2.16958	244.035	1005.93	864.626	698.561	910.783	798.4	847.065	879.791	745.23	890.154	911.617	783.62	737.509	792.879	906.294	781.178	879.074	779.551	853.874	902.087	762.892	764.71	775.923	770.876	805.045	947.389	797.086	724.607	927.041	798.593	883.809	951.659	918.054
743	670.561	2.16958	276.492	3213.47	3654.08	3075.31	3591.58	3317.52	3541.66	3611.49	3145.32	3790.76	3738.84	3383	3417.11	3374.42	3740.47	3309.24	3646.02	3256.6	3611.88	3755.41	3169.48	3263.19	3621.18	3569.11	3556.66	3666.32	3239.36	3110.94	3640.37	3299.52	3678.89	3747.61	3551.68
744	871.52	2.16958	282.861	423.443	325.822	251.521	350.282	315.475	330.455	321.991	270.093	450.891	430.654	356.773	331.119	344.805	388.137	329.309	395.648	346.431	330.859	412.025	291.061	336.15	393.28	359.373	366.577	432.673	351.722	263.662	423.549	360.891	430.182	420.571	472.586
745	904.679	2.16958	296.491	2144.78	1731.33	1460.5	1895.95	1486.19	1617.22	1771.4	1371.08	2037.55	1988.14	1706.93	1643.46	1617.95	1882.28	1631.36	1839.8	1622.52	1821.82	1931.64	1505.21	1688.08	1835.31	1641.92	1670.86	1952.28	1678.28	1405.44	1868.58	1684.91	1895.28	1980.45	1944.91
746	916.64	2.16958	300.145	183.054	188.255	123.087	199.276	128.555	139.003	185.214	116.254	176.695	188.167	139.072	182.165	166.939	182.37	171.75	197.226	143.166	178.123	169.551	121.129	127.309	172.598	147.169	167.111	184.393	119.672	117.549	165.897	157.65	207.048	191.903	191.663
747	349.246	2.22317	198.505	154.183	171.127	140.76	174.877	146.314	171.552	159.82	149.498	159.875	180.09	142.544	163.864	175.595	214.968	175.403	190.857	161.722	185.845	177.195	166.347	141.585	149.745	145.212	161.405	183.268	123.752	187.187	154.202	174.498	180.296	174.79	157.973
748	351.262	2.22317	199.986	154.791	197.26	153.841	202.428	154.032	179.271	193.521	156.034	194.341	197.496	193.218	184.443	188.461	231.287	174.139	194.399	174.288	187.712	168.759	185.043	182.494	179.83	184.719	185.545	195.794	155.327	165.944	199.096	184.677	202.357	203.84	188.059
749	722.408	2.22317	259.139	5047.78	4263.66	4165.25	5152.67	4336.48	4819.48	4780	4152.59	4728.9	4243.5	4490.03	4246.98	4426.24	5021.8	4109.3	4469.02	4241.15	4487.17	5207.58	4793.15	4460.85	4820.21	4451.53	4455.08	5366.42	4936.03	4314.58	4933.3	4772.69	4964.19	4844.55	5026.98
750	806.653	2.22317	292.04	70.2207	82.6197	74.2945	89.3199	71.0054	80.3168	97.7745	67.9419	95.1293	59.2051	63.0126	68.7642	72.5392	86.9523	72.9299	82.4667	40.6386	64.8137	68.0076	58.9217	58.2769	82.0513	60.732	66.8817	64.1904	79.7486	61.3475	64.4992	72.1083	82.6897	72.9152	84.7598
751	224.2	2.25698	180.23	416.39	573.516	480.465	500.839	548.742	513.779	516.546	487.574	586.705	554.748	512.097	605.053	562.27	542.628	535.074	574.234	540.149	589.742	584.836	542.449	565.041	561.292	571.198	564.239	542.442	525.265	502.862	555.291	502.982	576.082	571.923	504.425
752	250.252	2.25698	190.432	157.615	224.347	158.513	172.132	270.066	225.096	162.582	149.727	240.049	258.551	222.329	283.276	279.188	248.831	247.804	300.128	259.968	284.714	301.774	206.483	249.969	286.146	258.543	243.524	200.112	210.656	183.921	227.452	177.858	212.089	192.487	180.569
753	408.33	2.25698	209.422	984.327	1201.88	1051.42	1226.19	1116.49	1169.01	1191.58	1065.61	1247.15	1278.1	1152.88	1167.83	1143.61	1238.67	1231.46	1185.54	1130.91	1142.76	1205.98	1138.28	1168.23	1234.44	1148.27	1179.01	1213.57	1105.96	1042.64	1236.09	1139.62	1251.74	1290.27	1276.58
754	432.42	2.25698	230.724	490.29	1016.82	734.899	561.996	1249.56	889.594	664.831	638.883	1120.45	1166.12	962.93	1180.57	1217.92	1078.55	996.271	1342.04	1105.68	1349.29	1461.72	912.467	1168.13	1418.58	1194.69	991.395	784.304	808.364	836.062	857.278	663.093	1010.91	690.547	677.154
755	450.432	2.25698	233.263	5793.51	11092.2	8364.32	6337.42	13353.3	10153.3	7091.93	6646.13	12182.4	12457.3	10703.2	12556.7	12950.7	11861.9	12267.7	14421.5	12061.1	14587.9	14781.7	10129	12393.7	15318.8	13561.9	11169.3	9019.66	9473.44	9784.69	9581.44	7792.04	11004.2	7911.96	8249.17
756	450.535	2.25698	233.261	9.71322	37.2691	17.0718	18.1837	45.5353	34.332	22.7744	18.5538	49.0322	39.9992	35.7378	25.2438	35.0042	34.6456	31.6702	50.5838	35.5347	46.2092	53.041	29.4166	36.8518	46.2447	46.3359	32.6083	27.6133	18.6487	24.2159	27.8331	24.3472	31.8067	20.5768	24.0926
757	450.645	2.25698	233.259	17.826	45.7668	25.4895	20.1603	74.6505	38.5864	19.8773	16.4248	70.2796	62.0533	28.9134	92.2911	107.315	47.6054	55.2234	62.1418	42.4801	135.856	137.979	61.4441	61.4105	143.117	61.5273	43.8021	37.7427	25.7466	37.625	31.8419	19.1946	76.01	21.6397	11.406
758	452.024	2.25698	233.239	0	24.8278	11.3593	0	41.3978	21.96	5.077	5.39952	26.8489	25.1074	24.9132	33.0119	33.755	28.931	25.2705	38.3954	29.8489	52.1357	45.417	20.7242	35.263	50.5143	38.5381	23.5711	13.4111	20.8805	10.1897	11.2782	4.40376	18.2517	0	7.38169
759	499.365	2.25698	225.536	2880.02	2882.86	2546.71	3019.78	2681.08	2730.57	2893.55	2520.22	2946.19	2996.49	2846.24	2780.29	2659.88	2932.52	2693.71	2963.35	2667.06	2700.36	3003.92	2586.5	2742.6	2919.37	2807.07	2854.65	2897.22	2692.78	2568.24	3011.2	2819.17	3091.55	3048.94	2991.09
760	631.446	2.25698	262.481	4137.8	7738.62	5659.19	4313.33	9962.91	7229.93	4806.06	4670.9	8554.37	8465.03	7485.64	9093.5	9373.4	8693.7	8316.78	10506.8	8542.15	10590.8	10781.9	7203.75	9041.12	11338.2	9642.34	7483.8	5844.07	6498.06	6591.82	6728.49	4885.94	7419.13	5102.42	5067.01
761	631.564	2.25698	267.738	1884.79	2048.99	1621.31	2092.59	1735.72	1862.78	1970.79	1618.4	2129.59	2312.1	1903.29	1813.34	1872.64	2119.4	1823.56	2124.12	1688.92	1950.4	2179.22	1600.61	1756.84	2875.65	2026.64	2054.03	2134.86	1796.22	1668.63	2115.19	1925.35	2244.43	2333.13	2148.86
762	649.456	2.25698	267.581	3067.6	5656.33	4081.66	3079.06	6583.17	5127.19	3764.09	3347.84	5934.03	6298.3	5290.47	6172.27	6203.47	6047.17	5990.2	7414.63	5941.7	7182.79	7180.14	4832.09	6086.32	7375.95	6798.69	5267.11	4540.72	4746.1	4779.78	4988.06	3744.94	5186.03	3913.23	4138.09
763	654.537	2.25698	262.284	422.197	380.443	338.371	438.768	370.094	397.945	382.02	342.535	466.092	448.185	384.718	422.688	440.449	401.438	425.297	403.88	410.097	393.288	485.475	381.467	418.338	467.201	425.191	424.815	525.315	396.828	409.679	491.944	596.818	498.234	511.365	673.509
764	671.438	2.25698	266.091	4583.48	5863.1	4155.94	3505.17	6985.86	5217.32	3765.93	3356.7	6512.77	6546.79	5272.92	6575.12	6779.28	6483.86	6032.64	7987.41	6151.09	7629.74	8161.06	5202.55	6665.24	7961.53	6803.35	5380.21	4519.34	4830.67	4904.03	5123.51	3723.16	5764.65	4102.82	4085.35
765	687.412	2.25698	268.581	1624.52	2444.57	1896.58	1674.7	2867.07	2402.33	1797.87	1618.68	2516.35	2526.19	2344.53	2843.46	2719.33	2557.31	2527.87	2959.41	2677.41	3035.21	2855.25	2353.13	2758.14	3152.99	2865.61	2534.08	2022.43	2220.15	2245.03	2155.47	1842.83	2249.88	1811.72	1900.75
766	740.667	2.25698	292.476	701.471	860.137	735.473	911.797	788.95	819.434	850.954	689.992	911.858	871.425	854.38	800.035	790.69	877.021	814.587	842.423	773.459	855.175	926.631	755.088	814.293	865.298	805.291	786.808	876.624	816.865	762.234	906.539	843.742	875.154	911.586	840.394
767	864.557	2.25698	290.459	518.532	430.723	334.539	459.068	327.99	470.123	413.598	262.622	486.689	496.042	416.821	493.261	489.355	530.205	456.292	472.205	453.158	474.961	473.379	347.831	458.176	427.329	454.344	473.742	679.443	503.207	474.572	635.405	647.269	563.224	551.071	742.462
768	481.301	2.2908	222.908	1485.24	1283.31	1145.98	1318.45	1195.04	1202.82	1298.83	1154.91	1313.29	1335.21	1224.81	1215.86	1202.45	1368.78	1207.18	1330.08	1228.62	1229.25	1340.21	1135.5	1218.52	1308.15	1232.93	1246.58	1332.13	1187.1	1170.3	1355.77	1263.74	1266.52	1429.86	1327.12
769	531.471	2.2908	250.124	252.432	337.9	269.629	189.11	268.774	247.555	308.033	222.433	226.981	471.666	277.792	290.948	258.887	266.794	249.688	411.895	272.429	328.155	226.037	260.551	277.517	284.872	300.668	281.602	192.602	240.558	169.528	223.923	195.662	286.133	444.502	239.505
770	621.585	2.2908	270.442	149.453	211.942	169.709	229.799	171.679	186.934	217.196	163.99	204.548	215.47	194.83	200.142	194.638	222.218	196.007	202.698	161.681	166.065	215.424	168.118	205.33	223.834	203.294	220.196	218.422	188.106	176.394	204.513	189.569	218.757	242.988	206.373
771	676.37	2.2908	247.429	267.055	241.977	215.199	262.035	207.352	225.858	267.626	220.148	276.105	270.323	225.739	244.446	248.592	253.205	228.312	254.207	187.931	247.332	269.826	212.731	258.525	236.422	234.84	249.993	250.618	218.121	221.683	222.854	244.929	249.711	248.475	268.428
772	969.6	2.2908	307.262	228.297	208.388	172.065	237.483	184.287	160.409	245.461	166.015	266.358	239.771	215.714	221.325	203.014	216.428	215.759	238.133	164.43	246.489	246.035	190.846	238.424	235.533	174.112	223.62	262.644	219.595	164.58	258.187	214.456	288.499	274.126	252.034
773	497.278	2.3246	206.743	2031.49	2095.34	1863.4	2137.61	1861.24	2042.73	2085.49	1695.68	2155.37	2143.63	1987.86	1953.68	1926.49	2030.28	1958.88	2087.23	1892.07	1982.04	2095.49	1924.31	1926.8	2005.44	1991.63	2046.02	2199.03	1899.4	1819	2093.25	1992.44	2143.6	2243.77	2172.03
774	655.441	2.3246	250.284	242.669	234.237	236.293	248.375	206.946	240.364	268.315	219.344	236.45	246.394	232.597	248.538	247.998	274.251	239.297	223.58	209.409	237.006	254.079	233.034	252.995	246.973	246.434	243.71	280.125	262.291	207.749	271.916	244.074	263.256	258.371	245.466
775	948.774	2.3246	323.054	145.958	159.814	134.375	155.982	156.411	136.142	171.675	117.061	169.711	169.761	130.799	132.717	151.764	164.148	113.729	130.991	119.233	143.992	192.758	122.87	132.782	143.5	155.009	154.521	142.891	119.612	142.734	156.905	137.357	156.957	184.997	168.478
776	353.181	2.3782	182.905	1500.18	1257.71	1110.31	1355.87	1219.3	1194.9	1265.5	1143.15	1246.51	1290.59	1200.34	1210.21	1232.05	1334	1196.18	1263.66	1159.07	1279.84	1298.62	1149.61	1225.38	1306.65	1195.87	1212.79	1354.19	1193.52	1145.62	1305.13	1249.28	1269.19	1369.94	1325.3
777	477.365	2.3782	230.062	154.017	155.941	112.705	157.09	115.264	144.183	137.8	117.792	136.582	149.125	122.185	117.812	120.22	122.642	130.663	140.779	108.17	129.168	147.942	111.697	117.861	121.698	129.25	120.09	169.63	142.681	136.712	132.9	152.743	143.994	169.116	154.835
778	623.423	2.3782	250.548	459.424	454.567	388.936	471.83	398.016	426.065	435.863	389.248	483.312	485.63	470.211	440.506	372.065	435.406	395.134	479.187	396.338	391.358	505.446	416.251	429.965	469.975	470.432	441.564	506.443	456.071	404.03	498.463	424.571	493.905	503.579	504.292
779	749.425	2.3782	257.641	407.55	360.396	269.74	369.539	319.309	339.82	361.948	266.08	373.147	370.037	321.363	306.801	300.82	367.772	328.309	360.758	304.408	304.715	379.306	288.474	330.15	326.005	324.518	295.527	365.919	294.727	275.926	343.835	315.892	349.84	369.081	341.124
780	781.427	2.3782	260.092	1411.01	1256.84	1032.54	1270.87	1091.55	1175.75	1241.73	1022.75	1339.45	1377.06	1176.57	1128.37	1085.35	1273.73	1127.08	1292.78	1080.72	1250.31	1248.25	1056.81	1153.19	1280.52	1163.91	1158.01	1437.17	1143.41	1065.94	1347.18	1250.96	1351.54	1388.04	1356.42
781	670.552	2.412	271.317	2587.58	3060.14	2601.39	3068.51	2624.68	2806.22	3060.52	2623.43	2980.59	3067.04	2820.03	2722.38	2645.22	2966.79	2744.3	2862.74	2663.96	2742.64	3155.15	2665.74	2757.47	2981.1	2880.7	2844.94	2988.58	2802.19	2533.15	2982	2870.65	3031.25	3178.3	3010.36
782	886.69	2.412	307.665	85.4898	102.441	76.9432	110.814	82.6114	112.854	96.449	76.2261	91.8077	103.711	119.067	108.83	67.4973	112.851	64.3662	108.54	80.7726	84.1368	110.092	75.5093	98.463	81.2767	97.7887	91.1956	93.3363	72.852	88.7078	116.352	81.9599	122.705	116.174	120.682
783	673.431	2.44582	252.832	1965.34	1927.68	1722.45	1978.1	1815.68	1940.95	1929.1	1800.35	1967.37	1975.38	1931.15	1890.15	1755.65	1966.26	1872.58	2050.04	1826.02	1805.45	2024.88	1870.68	1870.69	2068	1872.6	1937.63	2021.57	1960.11	1786.6	2028.43	2042.61	2083.48	2058.23	2036.78
784	687.406	2.44582	258.06	1231.31	1094.99	915.86	1118.58	1013.93	1055.34	1126.75	917.962	1116.17	1173.94	1078.14	1061.55	925.865	1177.18	1045.31	1100.57	1018.92	1081.71	1129.94	1017.05	1059.81	1199.85	1089.08	1079.25	1047.35	1048.84	926.423	1107.08	1110.36	1119.45	1127.03	1112.91
785	703.396	2.44582	245.888	1623.3	1472.55	1284.35	1647.3	1322.82	1390.66	1525.55	1352.09	1569.75	1588.26	1441.54	1405.17	1358.33	1615.4	1367.79	1609.14	1376.02	1482.83	1575.41	1405.66	1407.51	1479.65	1504.23	1452.44	1601.63	1471.06	1370.39	1523.81	1534.34	1586.1	1634.09	1548.7
786	710.57	2.44582	273.6	670.921	766.888	605.628	712.881	581.273	700.812	695.669	602.654	729.969	738.526	662.5	653.126	687.699	746.304	734.606	727.742	659.568	722.506	758.005	626.335	662.324	753.56	694.829	681.454	764.816	659.012	591.237	735.687	697.277	795.319	791.239	699.674
787	1026.63	2.44582	305.802	192.098	135.192	92.5174	157.546	134.27	114.299	142.889	82.1171	171.113	172.28	107.698	145.39	111.281	188.361	118.952	161.691	120.971	112.37	171.299	109.21	115.004	158.704	120.489	138.121	190.565	112.911	93.3896	190.937	124.293	174.742	194.162	147.151
788	378.226	2.47963	199.459	441.032	412.788	365.017	499.271	405.173	383.396	430.658	405.185	412.458	463.72	446.428	364.889	388.472	449.851	382.955	467.037	396.331	418.117	418.824	387.298	429.359	425.349	434.817	404.523	473.033	395.909	396.193	443.672	400.022	409.686	487.808	474.851
789	583.417	2.47963	254.951	1369.46	1657.5	1342.33	1648.03	1515.91	1534.29	1596.42	1481.2	1687.51	1696.13	1529.87	1478.78	1548.8	1644.99	1495.05	1664.93	1429.81	1553.21	1698.31	1434.82	1598.08	1667.62	1540.25	1559.23	1692.38	1524.03	1438.62	1698.36	1623.09	1723.49	1734.11	1712.5
790	597.389	2.47963	237.132	732.418	687.786	544.877	666.723	562.771	637.907	644.225	543.02	639.943	630.748	603.766	608.051	606.958	647.138	614.676	658.147	592.847	618.132	662.364	563.617	616.932	634.136	617.64	646.135	731.675	614.238	566.728	623.166	725.532	632.974	694.666	676.623
791	740.668	2.47963	289.963	391.767	494.452	397.949	481.337	441.189	483.74	481.493	454.343	486.084	530.051	428.819	467.799	448.198	517.977	459.803	482.18	437.047	401.561	506.254	477.075	480.486	491.685	473.803	479.955	504.265	422.092	404.318	526.778	487.227	508.479	515.627	498.938
792	843.638	2.47963	301.764	337.926	350.902	224.806	337.143	232.066	320.071	287.569	251.009	404.096	400.423	271.812	258.863	277.513	343.618	270.037	314.788	243.721	247.738	391.4	262.214	272.617	391.262	363.592	316.357	444.917	294.685	251.179	377.173	372.12	402.231	443.419	447.894
793	891.584	2.47963	295.314	125.148	127.018	67.2915	98.4347	101.439	98.2981	120.343	60.4902	113.419	139.572	111.443	86.1513	108.847	122.69	115.741	127.231	101.643	127.388	116.712	88.027	113.824	110.974	80.8196	103.552	138.661	104.021	78.8029	135.864	122.768	140.39	142.413	129.623
794	247.197	2.53322	174.38	85.7241	93.9743	83.2258	82.0705	68.3617	76.8621	96.3781	75.2017	85.0004	89.423	97.4395	85.6028	109.879	99.5575	84.191	87.6827	91.7182	108.763	75.834	79.7873	83.8539	97.4684	75.7607	82.2145	107.947	86.8522	86.5756	89.5161	85.0084	95.313	107.448	80.101
795	439.343	2.53322	224.924	1963.18	2460.84	2257.41	2467.43	2226.92	2364.2	2325.38	2165.78	2388.53	2486.91	2407.95	2381.68	2023.47	2560.74	2331.96	2461.81	2311.67	1978.6	2439.94	2325.11	2372.86	2538.5	2527.12	2383.57	2445.61	2353.01	2192.3	2354.26	2480.57	2507.97	2468.7	2441.05
796	809.412	2.53322	261.252	173.823	161.232	113.402	159.845	119.996	130.126	134.423	129.014	186.43	153.663	145.553	138.971	137.211	189.599	131.113	143.14	126.484	147.414	180.916	134.539	134.749	159.117	144.327	128.842	151.592	135.197	126.064	185.63	143.585	178.086	180.344	187.994
797	855.481	2.53322	272.72	98.1344	46.4168	61.0111	78.7986	57.255	62.1552	67.7504	57.4363	60.5249	94.1007	66.5723	44.6951	50.0392	88.7979	62.7952	67.1029	57.9177	43.0157	64.3678	47.5703	43.4731	90.6975	64.4841	46.2143	75.6554	59.8407	37.4933	65.6925	87.2037	77.123	70.9431	73.2772
798	857.511	2.53322	276.563	362.917	260.771	195.3	257.931	224.602	264.97	273.876	197.917	252.764	299.168	231.417	210.618	242.471	283.783	235.759	237.181	234.083	258.798	276.254	186.325	225.48	275.395	244.65	257.142	328.23	218.737	199.574	290.645	248.985	334.433	278.571	344.695
799	915.543	2.53322	285.178	358.377	324.356	203.951	312.816	244.323	332.273	278.874	208.29	272.188	321.787	285.301	257.484	239.287	341.229	257.298	277.029	221.997	273.566	302.714	209.937	239.737	311.193	271.136	217.151	280.285	260.336	210.524	297.88	287.258	287.587	319.234	308.7
800	163.128	2.56703	161.611	126.843	199.066	189.974	193.234	185.815	180.612	170.703	180.152	190.094	232.273	186.474	221.823	188.901	185.92	188.771	201.432	188.01	205.313	172.832	177.388	195.196	163.772	186.614	190.556	177.289	187.81	165.156	214.767	199.736	208.741	230.813	190.575
801	216.087	2.56703	163.853	221.805	268.378	246.376	296.217	276.569	313.23	287.146	278.196	275.249	241.585	278.921	288.671	236.47	287.783	270.878	289.302	262.524	245.504	310.086	284.641	310.624	286.671	281.695	281.231	298.61	305.079	259.09	305.098	287.474	305.021	276.723	295.946
802	426.383	2.56703	222.259	152.829	214.517	178.33	218.094	192.161	192.661	203.023	189.719	192.23	206.793	236.872	206.91	143.346	199.977	208.209	191.022	197.847	152.045	202.558	204.048	200.352	220.557	202.587	212.77	187.107	212.522	197.267	237.336	200.43	227.955	217.994	196.148
803	491.263	2.56703	215.586	1209.77	1177.25	1007.16	1142.56	1084.03	1149.31	1155.65	1007.86	1209.4	1157.11	1088.46	1068.88	1106.84	1179.12	1078.49	1187.11	1033.77	1143.94	1241.47	1009.24	1055.73	1139.24	1150.27	1124.03	1158.97	1115.27	998.334	1173.39	1115.64	1229.9	1217.41	1148.79
804	566.389	2.56703	238.804	1144.81	1155.78	982.556	1187.14	1040.28	1101.13	1109.75	950.202	1117.84	1131.46	1056.58	1053.98	1008.16	1176.8	1079.63	1185.57	1017.79	1141.16	1200.2	993.795	1052.22	1084.76	1058.04	1038.81	1156.83	1056.98	1005.4	1157.48	1097.45	1114.84	1180	1135.35
805	610.404	2.56703	243.882	607.744	628.769	506.608	592.36	536.293	526.796	595.764	519.211	590.34	595.888	570.829	522.257	557.383	580.302	579.568	619.654	569.519	579.306	610.754	551.643	554.409	598.608	599.916	563.34	564.861	543.208	563.016	608.407	576.79	649.092	631.538	610.59
806	457.194	2.60085	202.768	369.536	328.809	320.041	375.6	349.514	338.26	389.975	340.681	376.519	381.313	355.563	355.056	318.344	376.28	318.156	381.156	314.502	372.223	343.991	329.911	361.936	379.764	352.922	339.339	416.897	316.952	336.5	370.773	355.102	354.928	369.311	371.828
807	465.391	2.60085	223.117	313.753	427.464	375.176	439.507	388.705	380.348	383.721	311.043	367.073	451.955	381.487	347.738	325.093	420.393	375.38	429.895	352.982	311.556	412.721	339.267	456.485	373.002	374.291	375.577	441.811	361.232	315.213	416.306	417.897	422.524	428.614	447.917
808	621.588	2.60085	269.137	309.13	370.493	346.428	405.589	379.096	365.27	354.889	343.351	348.913	385.906	392.408	418.53	239.677	373.977	348.936	395.134	342.759	267.971	421.053	339.14	371.751	425.312	428.903	361.178	361.524	401.771	314.041	385.695	430.166	448.56	407.463	360.675
809	636.602	2.60085	274.202	2193.45	2274.74	1841.63	2403.44	2011.24	2141.74	2331.07	1981.72	2375.94	2558.75	2207.69	2155.24	2089.79	2351.94	2237.65	2264.69	2072.11	2004.03	2616.35	1998.08	2167.6	2462.68	2196.97	2204.57	2412.3	2248.64	1964.78	2342.89	2202.86	2519.09	2644.4	2483.07
810	1019.61	2.60085	307.05	280.046	191.127	166.724	246.466	167.636	179.573	189.204	158.699	208.729	216.576	229.355	155.941	182.804	223.468	166.956	250.527	169.824	215.854	245.584	230.212	165.558	215.77	174.489	181.072	202.862	212.011	165.765	219.056	232.581	255.154	276.016	227.947
811	370.294	2.63467	195.03	5190.75	8826.31	7801.51	8881.67	8169.51	8209.92	8759.25	7810.76	8945.73	8856.35	8267.64	8109.78	8175.93	8546.35	8209.29	8576.61	7989.38	8562.56	8881.87	8181.08	8046.44	8567.25	8297.93	8507.57	8826.63	8032.21	7823.4	8549.27	8495.59	9017.09	9175.28	8520.97
812	383.241	2.63467	203.894	272.098	297.866	258.859	303.783	264.185	315.964	292.414	288.812	303.169	322.555	312.528	283.872	295.149	304.216	283.491	280.215	313.968	270.08	320.374	288.531	300.598	336.214	307.424	283.538	295.729	283.301	295.71	289.641	308.42	331.594	311.696	319.473
813	671.42	2.63467	260.828	2021.66	1882.99	1656.6	1935.43	1791.88	1836.27	1854.43	1678.45	1832.78	1929.25	1836.89	1844.66	1661.56	1883.04	1757.19	1911.72	1808.17	1754.47	2046.77	1709.92	1850.8	2065.11	1853.22	1928.66	1866.79	1849.59	1654.67	1837.8	1858.78	1915.02	1932.18	1857.59
814	274.274	2.68825	192.737	8859.03	21792.4	18960.2	22046	21049.4	20906.5	22446.2	19581.8	22256.5	22099.2	19852.9	18913.7	21936.1	21992.6	20105.5	21147.5	20196.9	21760.8	23244.4	20574.9	21164	21660.4	21480.2	21132.6	22775.4	20945.3	19922.2	21743.4	21306.6	22313.5	22553.5	22598.2
815	274.44	2.68825	192.732	0	98.4684	89.4082	100.03	71.4077	43.7227	90.7277	61.2905	62.886	47.2224	70.2859	54.0416	16.8415	60.7248	50.6502	44.7743	73.1166	8.46695	89.6337	86.8704	69.7426	113.03	80.1264	101.734	82.9166	102.83	110.034	55.9051	103.363	79.0816	62.0276	54.9434
816	302.305	2.68825	199.646	1703.69	4826.1	4350.69	4837.94	5042.15	4913.75	4994.65	4776.01	4635.7	4678.08	4748.71	4641.17	4042.78	4993.66	4511.85	4688.73	5007.32	3630.32	5064.27	4915.62	5031.13	5077.24	5134.69	4936.35	4835.33	5167.1	4766.24	4705.91	5096	4932.75	4604.67	4941
817	382.401	2.68825	217.235	483.981	899.532	758.574	900.476	821.426	825.081	876.059	751.999	870.228	868.751	803.397	712.288	830.805	889.158	851.803	860.595	779.839	745.636	851.222	768.456	799.069	818.869	818.968	779.162	887.382	745.853	737.553	893.877	856.17	844.499	901.536	884.16
818	396.417	2.68825	219.883	1233.08	2066.17	1984.14	2080.36	2004.65	2095.12	2014.89	2019.17	2114.26	2105.99	2089.81	2122.8	1808.78	2227.81	2042.92	2102.17	1992.98	1861.78	2116.05	1948.75	2101.49	2046.38	2085.86	2056.98	2044.43	2086.81	1960.59	2116.15	2060.61	2046.1	2207.48	2110.69
819	400.412	2.68825	218.358	769.461	2237.25	2161.21	2065.96	2152.76	2172.75	2129.62	2132.85	2019.77	2134.18	2223.58	2206.57	1775.64	2096.21	2143.8	2179.7	2109.44	1662.71	1994.35	2161.14	2166.24	2151.79	2143.21	2220.45	1997.29	2147.3	2037.07	2077.89	2227.39	2053.96	2087.95	2071.66
820	414.43	2.68825	222.456	2026.37	6125.72	6243.96	5934.4	6354.99	6478.68	6320.52	6557.41	5951.7	6035.1	6330.36	6275.93	6060.52	6312.71	6448.86	6358.44	6399.8	6010.71	5842.6	6375.75	6448.98	6260.98	6130.56	6143.18	5811.41	6422.26	6201.96	6364.36	6314.16	5669.15	6060.88	6001.65
821	459.322	2.68825	231.723	5860.22	5747.39	5296.51	5925.33	5205.06	5525.81	5795.79	5173.91	5739.82	5848.22	5508.31	5724.09	4959.59	5924.4	5459.45	5993.87	5396.64	5249.89	5861.39	5461.61	5490.67	6036.93	5650.52	5652.53	5696.7	5518.46	5536.72	5772.89	5443	5981.97	5961.22	5966.35
822	539.265	2.68825	225.092	405.954	303.438	273.502	342.93	289.033	326.844	330.556	262.917	332.341	340.08	300.206	314.051	353.828	331.795	298.841	344.001	310.902	361.401	344.023	309.118	305.873	342.837	359.243	321.098	351.889	286.008	280.555	356.066	304.306	366.416	363.979	312.576
823	571.317	2.68825	227.605	1238.31	1037.94	995.008	1108.51	961.552	1041.4	1077.11	942.349	1087.49	1096.47	1054.93	1081.89	1048.22	1180.16	970.305	1051.3	1068.49	1013.55	1068.58	1017.29	1048.09	1144.99	1062.49	1076.44	1138.02	1047.44	1025.08	1083.63	1062.61	1120.73	1124.21	1145.51
824	620.507	2.68825	253.262	612.695	492.471	447.325	506.295	398.351	463.558	507.774	440.769	506.188	552.386	525.67	482.426	404.593	488.691	438.106	484.021	479.055	459.457	502.347	409.034	427.173	503.455	501.069	495.121	491.63	493.777	439.446	449.975	494.786	529.261	561.609	425.605
825	634.51	2.68825	262.454	3419.33	3335.8	3116.58	3581.57	2877.96	3224.15	3177.23	3109.34	3276.77	3687.22	3470.78	3472.42	2908.84	3258.55	3344.91	3438.52	3022	3051.41	3593.23	3128.57	3299.08	3623.74	3502.95	3393.59	3296.72	3261.31	3196.2	3364.31	3280.67	3632.61	3446.91	3309.33
826	711.351	2.68825	245.835	189.844	142.02	139.715	134.644	134.728	148.835	157.648	141.491	156.636	154.585	143.098	157.301	175.216	188.181	144.016	135.088	154.116	180.492	152.921	146.024	155.144	150.595	173.738	149.063	151.885	176.808	145.956	168.624	182.264	178.475	177.896	188.33
827	764.631	2.68825	288.538	323.928	271.432	230.387	280.375	283.873	244.717	241.754	241.994	275.741	284.972	251.459	254.709	250.482	292.154	267.4	292.787	262.926	231.748	265.359	245.439	264.512	263.022	269.54	271.663	308.343	246.735	223.54	268.422	266.602	307.923	279.537	285.967
828	181.132	2.72207	162.18	1790.02	3297.94	3298.49	3179.81	3399.05	3439.46	3239.61	3478.98	3192.81	3387.63	3509.73	3391.42	3243.52	3417.05	3506.75	3598.09	3312.25	3159.46	3185.54	3284.59	3457.75	3346.23	3324.32	3326.29	3155.2	3363.63	3219.2	3516.44	3403.07	3175.29	3357.47	3192.3
829	210.183	2.72207	169.225	293.281	480.56	420.95	435.495	434.877	446.407	449.152	364.923	474.989	472.325	441.583	401.63	438.37	407.392	458.576	420.086	395.124	448.514	463.387	375.571	402.592	444.557	428.708	450.325	505.113	428.362	432.63	474.748	436.196	483.374	496.666	432.848
830	246.242	2.72207	184.192	1377.51	3245.17	2809.94	3221.92	3001.77	2963.13	3238.49	2531.8	3099.77	3173.03	2845.3	2846.9	3198.05	3090.29	2876.65	2864.95	2892.55	3052.28	3274.3	2864.95	2915.09	3149.78	3033.17	3094.29	3292.65	2978.34	2843.78	2962.77	3087.85	3307.67	3298.57	3300.86
831	316.318	2.72207	203.843	581.005	1099.26	761.179	1250.34	916.716	975.541	943.62	872.323	298.516	313.257	381.345	345.971	713.565	1109.34	1412.53	1031.54	367.498	269.286	377.565	341.374	1000.77	1021.22	1080.47	364.862	358.449	349.576	1008.33	1025.82	1006.48	1193.67	986.258	1159.19
832	386.398	2.72207	215.696	833.867	2709.02	2619.93	2621.39	2866.3	2848.38	2841.37	2746.67	2593.41	2571.57	2730.86	2632.09	2648.73	2813.2	2612.91	2730.86	2783.39	2435.63	2663.21	2770.03	2838.99	2867.53	2827.92	2721.7	2630.1	2846.37	2734.06	2778.96	2768.56	2524.72	2572.27	2750.41
833	404.118	2.72207	209.492	344.139	291.896	289.652	341.277	313.2	336.107	328.001	278.234	350.484	303.384	315.533	277.78	354.648	325.843	290.926	317.64	306.994	376.534	289.151	271.894	279.706	310.485	298.263	328.46	356.881	301.14	298.573	363.671	296.855	304.572	342.581	301.027
834	428.442	2.72207	225.096	188.26	632.605	611.94	593.039	650.887	558.349	618.595	611.706	535.564	554.261	578.263	586.771	485.754	576.513	635.159	603.327	585.945	422.753	537.079	607.649	629.19	633.497	595.268	615.986	613.219	612.08	610.996	551.08	628.287	523.234	582.699	586.535
835	579.346	2.72207	238.679	467.61	411.505	362.153	458.566	382.708	389.104	433.193	364.66	430.15	444.681	392.171	409.046	413.937	420.762	396.176	423.314	408.745	431.928	463.489	394.946	389.8	431.134	436.256	438.397	413.671	416.856	394.833	449.336	401.436	439.86	487.872	441.458
836	699.501	2.72207	264.567	872.54	811.646	788.474	889.02	772.556	898.177	807.486	786.395	792.741	876.881	806.839	817.815	690.434	875.277	785.015	874.183	801.41	797.527	906.052	838.355	822.178	949.963	852.368	911.645	922.656	922.396	836.051	798.682	832.516	839.432	841.39	897.988
837	732.831	2.72207	311.1	5.54214	137.772	124.086	156.353	134.131	141.523	144.843	112.226	112.586	132.593	121.805	104.082	34.779	136.247	125.652	144.048	121.161	8.32849	141.671	136.225	123.71	146.759	144.545	127.402	125.051	136.651	113.105	123.102	137.823	157.227	115.595	128.579
838	741.382	2.72207	256.365	262.522	220.4	184.262	211.486	180.996	230.097	246.836	199.558	223.543	241.13	229.251	206.844	188.059	266.106	202.082	234.955	165.125	227.277	234.269	206.352	232.113	219.191	216.111	221.515	216.636	274.95	193.869	239.835	196.095	223.48	225.749	206.078
839	760.863	2.72207	316.967	299.312	1026.72	735.702	1055.04	818.438	959.831	1013.99	874.771	1079.72	1125.25	929.839	914.22	965.17	1011.31	949.435	1015.1	831.576	956.71	1096.63	865.747	914.143	991.625	924.391	939.028	1093.17	921.257	767.348	1001.71	944.775	1013.52	1138.44	1082.37
840	858.714	2.72207	306.595	238.464	240.662	180.979	216.584	199.485	206.855	210.389	182.542	200.097	233.888	196.813	212.054	194.789	203.996	206.748	217.058	204.508	194.341	250.013	193.885	218.125	223.986	215.352	233.442	190.309	207.267	165.357	219.809	208.602	268.921	231.726	241.634
841	886.603	2.72207	292.847	174.58	133.014	95.8351	108.842	88.7638	100.395	95.3713	104.287	144.294	120.383	134.972	111.671	100.458	132.052	110.338	91.3262	131.457	136.812	123.663	85.7	106.316	96.0403	130.784	111.582	151.125	109.265	118.938	132.5	107.559	151.9	126.461	161.67
842	174.06	2.75587	157.33	91.3465	104.89	125.593	109.598	98.4339	95.1999	96.4496	100.977	74.9548	96.1121	100.855	83.7323	77.5221	96.5713	110.628	105.445	109.577	91.8059	98.7526	113.259	109.747	122.517	100.498	84.3345	100.033	117.471	99.2117	93.4934	96.557	98.2701	93.3616	106.575
843	223.215	2.75587	178.633	155.9	323.799	314.938	304.951	316.969	311.894	304.063	338.711	281.841	277.202	364.981	361.521	189.126	344.321	338.861	351.049	311.951	174.272	310.254	292.426	331.745	319.708	326.36	316.791	279.555	339.332	317.058	341.768	358.249	332.712	285.279	294.47
844	424.479	2.75587	232.269	62.4983	210.287	194.316	201.402	178.163	185.88	208.947	170.149	153.507	203.064	201.203	210.42	63.9582	182.718	192.019	206.466	188.315	85.1367	218.109	168.806	165.91	242.31	195.341	163.366	188.331	188.21	173.034	182.42	191.945	218.384	173.213	216.965
845	442.455	2.75587	227.728	54.173	145.727	214.587	139.302	175.55	130.262	151.294	183.363	98.0605	106.918	186.155	197.441	52.0172	121.081	163.429	167.665	201.485	66.918	116.756	191.454	139.734	212.072	176.778	180.146	97.7793	184.546	191.992	117.903	158.859	135.379	91.6132	126.434
846	477.398	2.75587	228.649	98.2618	119.485	80.1954	105.026	79.9443	85.322	90.6883	85.0279	88.5974	98.0943	87.1375	88.3521	81.0397	111.21	97.9388	120.608	82.0018	99.1977	94.1125	92.9783	87.5802	88.2918	97.4527	89.3078	101.137	86.1781	82.7143	84.893	87.1134	95.2721	98.0969	84.6268
847	535.307	2.75587	232.178	581.551	496.946	457.677	571.315	501.997	506.523	544.521	432.3	547.428	564.172	513.051	486.333	541.168	566.098	492.734	548.614	469.519	583.041	570.075	493.234	496.518	525.821	505.298	512.739	564.648	468.688	464.19	541.164	536.788	529.362	596.037	583.478
848	609.47	2.75587	254.701	808.817	830.826	690.714	848.719	677.73	756.519	737.399	662.025	752.398	821.208	732.123	723.601	696.422	797.846	760.627	717.941	747.39	741.872	842.066	659.244	735.416	782.539	771.46	720.015	793.151	749.848	687.987	793.082	785.66	813.985	861.566	807.292
849	681.487	2.75587	263.388	876.635	797.798	718.361	785.658	680.126	708.519	751.757	704.305	822.743	820.872	742.28	713.879	729.258	770.619	711.508	739.293	769.577	786.151	812.869	725.609	702.11	823.696	727.258	733.303	791.36	769.237	683.506	797.977	712.796	816.043	827.525	817.548
850	788.895	2.75587	321.591	1216.39	3381.27	2976.6	3659.1	3219.17	3411.93	3610.69	3054.39	3767.95	3721.61	3322.15	3203.15	3076.94	3612.58	3263.49	3504.9	3177.26	3044.3	3740.33	3129.1	3238.48	3415.28	3360.22	3422.84	3787.22	3186.57	2942.16	3575.34	3355.02	3609.86	3793.7	3542.64
851	934.877	2.75587	334.979	387.442	1339.2	1028.83	1399.7	1151.91	1280.79	1312.41	1033.34	1381.54	1434.52	1216.07	1089.83	1208.83	1332.75	1188.8	1315.76	1060.31	1140.42	1435.38	1042.29	1153.8	1300.93	1217.97	1284	1421.35	1187.51	1046.35	1371.65	1278.24	1441.61	1461.67	1396.42
852	980.845	2.75587	337.099	89.8631	195.13	137.94	254.328	188.54	217.324	237.181	151.954	268.435	276.214	201.175	194.562	189.35	253.492	209.178	254.114	158	178.408	273.546	173.001	207.84	238.191	225.863	183.878	314.46	214.889	158.708	200.428	193.555	255.832	278.857	234.848
853	288.288	2.78968	196.971	2636.4	3016.58	2581.13	4102.59	2668.18	3087.76	2415.45	3409.34	458.486	440.537	451.279	445.172	2466.35	3609.55	4623.69	3078.87	405.011	336.619	461.544	386.794	2810.73	3160.77	3534.61	381.898	391.554	405.951	3819.48	3891.43	2928.17	4323.87	2441.56	3722.6
854	356.278	2.78968	192.219	3649.71	6309.71	5747	6618.01	6038.35	6015.74	6583.95	5626.35	6483.88	6298.03	5990.48	5738.18	6190.8	6384.57	5968.52	6205.11	5814.14	6175.32	6757.81	6341.47	6194.86	6295.39	5981.88	6223.65	6655.51	6093.13	5777.19	6199.55	6216.9	6548.52	6877.67	6409.3
855	480.545	2.78968	249.425	342.466	1109.04	442.438	1057.03	445.701	554.746	1113.83	422.323	1055.74	1010.39	544.348	478.568	515.012	1060.24	516.29	1044.77	437.184	1223.83	999.894	434.79	475.789	1270.65	516.667	544.401	1063.83	475.315	406.352	1078.82	462.102	1008.73	1057.7	1035.01
856	857.486	2.78968	282.933	338.852	241.205	185.877	237.232	203.154	183.59	250.146	210.265	263.247	288.306	238.511	220.728	248.498	271.148	187.489	240.507	237.222	290.014	272.935	181.557	226.165	233.889	254.598	217.679	314.892	230.124	212.486	262.326	247.531	270.419	296.729	299.333
857	906.846	2.78968	329.222	591.809	1267.23	987.217	1324.62	1127.55	1246.51	1288.75	1002.06	1277.13	1381.3	1137.51	1042.34	1037.26	1364.07	1250.79	1368.49	1040.08	1022.77	1342.22	1051.98	1178.38	1279.83	1229.34	1199.99	1225.87	1163.95	1008.41	1315.27	1251.71	1345.78	1363.15	1325.96
858	124.077	2.84327	157.995	3441.86	3125.39	2775.66	3040.42	2965.11	3033.86	3192.82	2858.22	3062.59	3223.02	3029.28	2946.52	3225.05	3135.36	2949.2	3099.62	2857.59	3273.79	3412.85	2874.41	2926.9	3141.72	3016.39	3082.28	3041.28	2882	2728.11	3097.7	3032.74	3007.8	3556.3	3052.35
859	218.209	2.84327	175.555	188.876	563.395	503.139	536.506	469.803	506.604	519.99	453.653	517.345	505.249	477.617	435.584	336.891	490.097	500.812	502.534	443.523	277.348	536.456	455.92	498.73	509.959	488.799	486.277	518.292	501.915	428.222	509.536	535.281	539.713	521.073	528.616
860	280.252	2.84327	192.547	388.495	628.916	551.974	607.072	575.996	557.098	640.38	552.348	595.76	672.001	593.702	582.406	438.485	644.501	608.541	610.251	569.475	458.727	659.888	567.78	597.055	594.532	634.012	630.689	667.889	726.386	602.262	752.755	609.568	684.728	667.209	660.477
861	290.269	2.84327	193.806	5605.36	7516.18	6924.84	7252.73	6422.96	7215.51	7249.43	6744.5	7891.28	8397.97	7205.92	6998.97	6280.35	7414.93	7593.28	7792.67	6508.73	6440.81	7490.09	6013.7	6492.08	6502.64	6373.34	6929.6	7513.29	6590.46	6258.25	8052.22	6665.79	7578.97	8052.81	7420.11
862	318.298	2.84327	199.22	5941.28	7203.65	6575.02	7259.58	6617.52	6978.74	7127.46	6568.25	7067.33	7394.62	6844.75	6627.4	5904.71	7136.64	6839.3	7145.23	6820.01	5738.65	7481.57	6734.62	6846.18	7137.1	6880.93	6928.41	7277.72	6894.92	6634.73	7267.16	6998.58	7457.28	7482.35	7456.42
863	354.409	2.84327	213.406	4085.75	5382.17	4813.46	5431.16	4915.1	5191.57	5440.46	5065.78	5458.26	5807.41	5188.45	5037.82	4232.02	5554.84	5065.46	5437.71	5135.14	4197.85	5792.72	4850.96	5117.48	5287.5	5221.43	5089.76	5579.3	5318.4	4926.5	5596.61	5268.6	5531.06	5786.98	5623.41
864	410.47	2.84327	231.099	1264.42	1961.2	1649.02	1970.18	1611.33	1876.69	1900.41	1642.98	1920.89	1984.08	1731.72	1771.79	1415.14	1917.23	1727.27	1914.5	1718.56	1385.89	1957.92	1602.22	1708.07	1785.23	1731.47	1773.85	1937.98	1825.77	1680.07	1861.89	1833.35	1945.76	1969.95	1916.58
865	438.501	2.84327	240.44	84.2426	329.775	235.657	334.368	277.352	306.272	334.143	252.092	297.619	334.905	279.876	262.944	161.617	307.822	284.083	302.99	274.311	169.032	342.372	255.971	279.31	274.133	301.465	297.305	327.803	291.272	249.801	321.358	285.295	335.43	345.813	294.155
866	452.515	2.84327	244.365	29.2937	161.912	124.964	171.279	112.088	157.119	198.198	108.611	167.845	181.816	135.952	102.254	63.6831	187.288	123.115	172.826	115.513	82.1227	147.362	110.123	128.788	230.496	127.735	114.624	172.504	127.969	107.687	185.611	124.107	198.119	184.511	165.597
867	466.535	2.84327	248.266	4611.99	7424.88	6367.56	7578.71	6388.28	6995.93	7461.25	6238.45	7290.91	7675.23	6745.28	6482.3	4911.09	7428.73	6936.7	7336.38	6487.78	4856.76	7458.83	6273.84	6671.06	7011.21	6680.43	6748.71	7433.85	6521.83	6399.54	7458.78	6730.09	7689.65	7742.74	7472.61
868	494.567	2.84327	253.301	7345.05	10906.5	9399.8	11096	9526.83	10146.7	11132.5	9516.02	10753.5	11394.4	9885.27	9862.66	7996.29	10849.1	10040	10751.1	9617.46	7907.25	11293.4	9247.34	9702.37	10274.4	9963.82	9972.52	10990.4	10041.2	9394.4	11066.7	10014	11264.8	11489.6	11130.3
869	508.579	2.84327	255.809	2345.4	3907.88	1841.86	3707.31	1900.17	2159.31	4165.08	1858.76	3647.02	3718.22	2099.51	2022.11	2213.23	3806.54	2130.04	3815.87	1934.38	4720.24	3632.4	1840.57	1978.8	3916.79	2194.77	2138.78	3802.31	2065.63	1809.5	3809.74	2156.25	3740.66	3718.88	3878.61
870	522.599	2.84327	259.648	59286.1	76198.6	67242	77672.7	66766.8	72146.9	76428.3	67166.6	77661.4	79628.6	69562.1	68692.4	75070.2	75263.2	70815.9	73959.5	68112.7	75385.6	79386.3	66316.3	69059.2	71807	69933.3	70286.8	77395.8	70334.2	66405.2	77324.3	69978.9	78455.8	80378.9	77983.7
871	536.608	2.84327	262.137	2117.39	4338.54	3183.17	4353.08	3140.39	3554.74	4513.12	3161.32	4278.31	4539.94	3382.66	3141.36	3568.32	4227.94	3461.03	4196.62	3216.04	4243.79	4520.35	3076.18	3264.85	3877.24	3302.59	3422.89	4343.96	3326.61	3101.62	4392.11	3395.8	4464.82	4464.93	4415.03
872	548.612	2.84327	261.995	1541.52	2075.31	1833.95	2183.55	1774.27	1975.91	2116.7	1761.59	2129.45	2244.29	1872.56	1807.21	1980.77	2089.82	1925.42	2054.22	1926.35	1922.56	2149.57	1778.04	1886.07	1905.17	1876.28	1933.32	2152.76	1885.42	1763.2	2184.56	1858.38	2154.37	2256.94	2094.39
873	550.632	2.84327	264.62	296727	361361	320899	364362	323783	344975	362258	316099	366693	378290	330967	322635	304988	357575	339336	355651	320329	306096	372630	315518	328932	340583	331507	337217	366423	325776	315916	367635	335177	370950	377941	367011
874	551.053	2.84327	265.935	1389.17	3132.91	2768.15	3236.66	2776.62	2947.89	3233.64	2770.8	3105.07	3296.43	2742.19	2833.28	1688.25	3073.06	2837.73	2848.76	2796.34	1595.99	3223.34	2657.15	2809.71	3006.01	2890.4	2869.14	3124.02	2860.51	2667.81	3187.05	2863.48	3310	3319.53	3219.79
875	551.299	2.84327	265.933	578.11	1765.29	1516.91	1706.19	1446.78	1596.82	1788.32	1527.56	1604.42	1812.47	1557.33	1569.51	771.156	1754.89	1566.88	1612.56	1507.29	700.589	1817.54	1456.91	1556.96	1597.41	1523.72	1601.97	1805.7	1603.97	1512.48	1665.19	1559.65	1920.63	1783.91	1763.65
876	553.968	2.84327	265.902	0	227.899	217.896	231.272	201.246	227.262	213.169	195.849	197.853	224.475	209.551	231.621	30.579	234.255	217.898	219.649	212.736	12.5233	246.056	194.692	203.677	228.105	204.533	206.696	224.621	238.699	232.973	244.639	198.353	233.279	217.009	233.836
877	564.618	2.84327	261.815	1936.57	3516.97	3271.19	3755.99	3268.19	3401.24	3565.26	3353.87	3506.87	3858.39	3433.48	3446.61	2150.95	3687.48	3372.79	3555.67	3402.44	2163.46	3806.21	3184.45	3353.5	3428.51	3286.87	3393	3683.67	3481.49	3215.59	3604.5	3404.32	3729.26	3772.59	3661.51
878	578.661	2.84327	272.179	11205.6	15626	13800.1	15940.3	13796.5	15438.3	15872	14093.2	16142.1	16944.9	14710.8	14675.3	14827.5	16206.6	14540.7	15699.1	14167.3	14976.5	16604.2	13536.9	14423.4	14803.4	14528.1	14811.9	16036.5	14433.4	13685.8	16487	14797.3	16635.5	16433.3	16323.2
879	606.691	2.84327	277.075	614.895	1391.01	1206.41	1456.15	1089.31	1275.46	1450.82	1121.61	1422.62	1455.85	1232.96	1204.49	1436.89	1372.67	1256.92	1395.51	1190.16	1495.84	1442.17	1103.85	1216.94	1317.27	1211.02	1287.45	1449.45	1236.96	1157.68	1445.42	1257.41	1503.85	1592.15	1494.35
880	638.609	2.84327	274.184	7755.16	9871.95	9016.64	9901.85	8983.64	9660.54	10095.5	8807.47	9583.99	10351.1	9563.22	9301.52	8209.57	9933.37	9481.5	10025.7	9212.44	7877.78	10552.4	8791.36	9253.91	9674.72	9444.08	9550.71	10151.6	9578.45	8949.1	10592.3	9572.57	10154	10159.7	10281.6
881	666.636	2.84327	279.097	2305.39	4102.63	3869.29	4220.92	3737.72	3928.55	4073.38	3776.47	3967.95	4286.59	4185.43	3824.8	2796.08	4068.87	3969.72	4115.83	3897.92	2727.58	4305.22	3697.08	3793.8	3939.78	3883.92	3933.21	4054.58	4090.67	3699.33	4030.25	3929.67	4310.31	4145.7	4064.42
882	694.635	2.84327	281.43	605.066	675.022	718.146	751.478	676.736	704.091	697.048	708.829	659.15	723.167	763.353	787.846	543.953	782.988	736.191	780.141	685.033	589.954	800.259	720.432	754.145	771.76	753.717	761.94	678.054	778.671	696.431	685.811	777.606	780.171	689.358	719.845
883	769.536	2.84327	269.319	153.648	145.344	90.4799	124.355	103.59	101.28	117.505	99.3579	134.474	118.942	114.55	108.307	99.9751	127.46	107.051	90.8807	89.8737	106.367	138.005	101.77	105.789	142.101	93.8999	105.447	144.271	91.5568	76.7359	131.43	101.876	122.754	126.949	148.336
884	167.153	2.87708	164.838	336.58	684.337	604.274	712.695	654.982	666.212	725.46	628.147	669.95	715.134	644.406	579.171	412.763	697.277	627.334	639.567	648.274	364.028	792.602	615.628	671.459	692.2	680.892	653.813	736.352	696.378	586.892	696.895	642.964	691.007	750.095	732.559
885	202.174	2.87708	164.498	1081.4	1467.51	1319.94	1491.79	1426.78	1405.92	1610.76	1336.31	1423.21	1478.99	1404.7	1355.72	1531.18	1445.71	1416.75	1426.84	1357.29	1584.11	1555.88	1334.97	1399.81	1429.89	1454.41	1417.54	1547.5	1401.84	1362.25	1454.63	1445.75	1539.21	1544.83	1524.09
886	232.179	2.87708	173.295	152.263	170.982	219.003	180.243	200.802	180.29	182.445	237.865	173.525	178.099	225.816	227.423	142.281	203.225	183.49	200.649	227.71	145.515	181.773	221.14	200.476	221.034	230.732	186.424	174.189	221.059	201.314	199.681	180.537	201.311	188.869	199.728
887	326.379	2.87708	211.103	8350.76	11277	10225.5	11266	9884.28	11472.2	11335.1	10388.5	12294.8	12920.5	11195.6	10384	9746.47	11910	11145.1	11948.2	10130.2	9853.55	12086.3	9518.53	10138.7	9993.91	10446.6	10480	11946.1	10375.5	9672.24	12385.3	10274.7	11677	12719.9	11877.6
888	343.178	2.87708	187.819	3096.9	2532.47	2183.81	2632.55	2313.19	2358.51	2536.37	2166.82	2913.35	2707.91	2305.13	2234.3	2514.3	2716.01	2405.97	2583.23	2220.7	2635.68	2721.99	2194.01	2328.04	2445.39	2343.34	2332.42	2803.94	2245.09	2215.62	2597.81	2242.21	2620.74	2938.72	2564.11
889	353.194	2.87708	186.052	686.325	653.778	539.638	710.492	643.596	601.418	661.591	591.01	731.346	694.353	648.597	600.058	605.255	649.981	652.354	660.643	609.749	616.325	630.053	619.581	595.18	611.682	672.332	647.817	655.519	615.832	543.519	718.927	603.26	667.932	702.265	679.641
890	379.074	2.87708	182.445	55.7976	63.1904	39.1665	60.9941	61.6597	70.5928	60.4452	56.3163	58.0038	50.8798	65.6974	46.4311	69.1228	64.0659	61.7129	57.2153	50.0528	76.6328	48.232	52.0782	45.5104	52.518	45.7327	58.8258	60.3225	51.849	59.5523	64.6845	55.2389	68.8618	60.4895	58.0192
891	467.293	2.87708	218.78	286.23	322.01	275.811	296.697	292.137	296.847	322.84	277.474	319.963	331.093	306.33	316.651	300.943	311.189	287.911	330.511	273.744	300.596	327.65	284.764	331.022	341.923	291.595	307.746	318.106	301.326	303.401	335.848	330.72	329.406	347.27	342.948
892	475.382	2.87708	222.984	377.652	369.214	322.072	409.812	340.577	331.661	383.814	328.103	397.729	380.644	403.947	386.379	338.29	400.65	385.476	393.346	341.339	373.584	392.918	336.873	361.838	372.616	381.968	398.385	393.246	382.673	356.608	404.943	396.838	415.402	400.432	388.346
893	490.28	2.87708	212.69	624.564	588.016	523.273	603.154	533.887	569.75	596.344	570.344	584.437	628.528	571.142	559.528	565.993	589.958	590.339	618.273	580.431	589.69	674.496	557.083	549.112	580.64	602.304	586.558	596.292	529.066	543.908	590.387	617.743	617.677	652.882	650.628
894	499.355	2.87708	229.781	1070.13	1010.53	916.115	1032.51	947.758	956.172	974.834	955.586	1021.1	1053.71	1034.38	1040.92	970.122	1021.67	983.529	1042.45	938.082	998.47	1064.75	935.049	960.98	1020.68	997.254	985.527	1022.82	936.66	913.536	1008.13	940.685	1059.88	1117.3	1086.5
895	522.828	2.87708	259.645	2.83926	231.096	232.183	256.127	231.97	242.72	256.066	251.735	173.593	272.543	242.705	256.174	24.8561	274.855	232.43	245.2	247.92	19.9621	275.853	229.737	234.061	225.3	235.321	216.745	250.419	267.091	222.352	261.45	234.406	269.985	232.316	276.085
896	551.43	2.87708	240.336	1672.93	1647.12	1243.98	1630.96	1353.46	1503.98	1509.71	1294.89	1652.08	1649.56	1394.2	1354.24	1502.54	1569.02	1453.21	1579.04	1331.6	1598.86	1556.34	1323.6	1382.6	1441.27	1297.84	1443.81	1697.88	1373.58	1266.27	1566.25	1401.97	1638.85	1622.79	1523.23
897	566.621	2.87708	268.388	4030.14	4612.07	4004.78	4866.71	4143.46	4396.34	4705.66	4017.11	4911.93	4969.71	4293.49	4220.81	3974.81	4783.37	4241.89	4700.09	4111.27	4001.37	5084.75	4043.09	4178.07	4556.64	4436.76	4266.27	4821.27	4187.16	3924.01	4746.84	4305.31	4891.4	5206.92	4748.83
898	610.578	2.87708	267.933	5291.49	6050.19	5343.98	6064.44	5367.91	5684.65	5973.3	5154.34	6451.64	6510.68	5997.34	5587.96	5495.44	6198.7	5948.59	6020.67	5500.78	5475.69	6337.13	5203.73	5650.71	5960.89	5815.2	5824.98	6630.25	5877.75	5357.89	6733.3	5763.93	6432.05	6567.78	6473.65
899	640.591	2.87708	272.87	11323.4	13709.2	12023.4	13808.3	12250.2	13030.3	13436.2	12178.1	13630.2	13685.9	13173.2	12787.1	12214	15287.2	12841.3	13615.1	12504.6	12010.8	14056.6	12254.7	12577	13343.9	13187.4	12878.4	13906.1	12801.6	12034.9	13929.6	12791	13702	13922.1	13791.7
900	668.621	2.87708	277.795	18877.6	23899.1	21863.1	23876.2	21457.4	23011.6	23739.4	21700.4	23525.9	24525.2	23108.2	22143.2	20495.2	25509.6	22949.1	23224.6	21831.5	20569.9	23978	21373.1	21857.6	23037.1	22465.5	22742.6	24079	22750.3	21267.5	24120.7	22446.9	24365.7	24401.1	23872.7
901	696.651	2.87708	282.691	13227.2	16216.3	14403	16426.8	14433.9	15313.1	15953.9	14085.1	16049.2	16771.9	15437.9	15160.6	13785.7	16900.4	14953.8	16199.4	14459.7	13855.3	16775.1	14433.4	14711.6	15325.9	15242.6	15201.3	16308.3	15323.1	14061.1	16402.5	15234.9	16510	16483.1	16467.5
902	833.472	2.87708	274.122	849.932	591.483	457.287	646.914	486.274	599.468	712.042	418.122	776.905	682.891	511.013	504.446	633.902	706.09	548.449	712.332	528.755	649.833	779.817	512.999	546.617	657.155	568.392	626.528	857.613	592.347	487.352	719.629	648.533	749.945	762.162	767.571
903	244.262	2.9109	187.48	309.471	329.629	294.746	345.168	298.881	344.497	358.884	329.321	379.798	425.183	340.148	311.585	369.851	384.712	323.514	390.261	312.334	374.53	361.029	312.11	303.174	324.693	318.727	312.177	366.061	321.355	301.147	389.237	307.237	364.194	421.568	353.805
904	388.393	2.9109	220.033	7633.88	7996.83	7189.08	8151.49	7435.7	7890.85	8066.43	7907.01	8393.75	8483.74	7781.59	7491.73	8064.14	8222.99	7579.09	8095.91	7443.38	8241.96	8516.95	7381.63	7597.26	8065.72	7850.58	7838.79	8447.82	7654.45	7154.43	8293.65	7950.1	8434.66	8767.15	8246.92
905	567.266	2.9109	219.121	450.753	419.843	335.769	398.502	355.762	359.793	415.701	287.297	393.368	397.22	345.566	371.37	405.107	417.638	372.906	388.838	358.229	449.695	415.784	374.95	355.365	392.852	375.354	353.263	450.144	372.698	319.871	415.382	372.212	385.968	435.001	424.525
906	567.388	2.9109	237.413	247.592	215.825	222.464	191.832	191.82	199.267	223.685	216.944	233.616	224.722	216.849	255.437	208.366	229.773	259.267	234.604	224.648	198.665	255.038	208.856	201.59	234.216	223.084	228.825	236.186	231.657	227.214	234.541	253.84	237.475	222.78	222.699
907	337.112	2.94472	186.378	439.746	356.161	346.232	370.987	333.064	360.681	371.461	336.798	371.901	369.334	362.253	337.775	356.433	388.515	376.689	389.894	306.933	403.916	339.307	350.755	357.786	341.576	334.733	326.244	394.219	353.235	317.374	400.997	364.749	367.107	369.194	412.958
908	360.361	2.94472	213.277	9907.23	10101.8	8922.25	10213.9	9424.93	9732.59	10095.5	9187.09	10214.6	10328.6	9522.03	9193.14	10078.2	10142.9	9712.11	9897.44	9231.31	10332.8	10602.3	9142.91	9695.24	10036.9	9834.21	9701.62	10394	9654.27	8956.94	10152.9	9715.97	10384.1	10687.8	10088.5
909	453.402	2.94472	227.565	103.882	89.018	117.978	101.358	105.08	108.998	97.4946	80.6996	103.342	91.6501	118.557	104.945	100.867	91.4009	91.5788	113.237	105.616	67.0859	87.2233	94.3434	86.3576	109.619	126.301	103.158	103.629	94.1097	97.7117	88.7636	99.0364	93.1633	72.1454	103.176
910	481.299	2.94472	222.908	3301.24	2269.17	2079.25	2401.33	2102.61	2162.17	2350.71	2018.47	2389.53	2374.86	2195.06	2094.69	2301.2	2404.43	2164.18	2270.59	2136.84	2368.89	2441.42	2145.12	2145.88	2259	2251.52	2259.05	2436	2121.93	2072.85	2370.67	2188.99	2450.17	2637.96	2388.6
911	845.512	2.94472	274.058	4524.34	3800.46	3092.32	3932.82	3164.81	3483.93	3747.28	3015.96	4239.91	4325.64	3441.08	3359.74	3843.02	4049.14	3567.9	3921.85	3379.81	3891.51	4147.71	3110.96	3455.39	3895.35	3719.05	3689.97	4291.25	3466.01	3003.55	4002.29	3919.42	4289.67	4570.69	4367.95
912	853.503	2.94472	275.301	115.189	91.8852	93.7719	109.327	88.5041	85.4404	95.9786	77.7713	105.302	111.465	79.3074	78.3288	102.371	100.344	71.8033	126.706	74.6131	118.656	97.6083	84.0672	104.593	105.875	76.1826	105.987	135.573	122.53	88.297	90.8076	126.043	141.69	108.616	139.38
913	507.425	2.9983	232.495	138.104	147.924	124.965	150.319	128.475	117.852	138.901	139.983	132.261	148.001	141.236	126.281	117.912	133.624	115.478	157.19	120.411	119.328	172.089	113.035	130.391	164.85	132.059	147.803	139.258	129.622	134.265	148.64	126.198	173.431	156.659	126.848
914	814.668	2.9983	301.937	650.487	570.853	432.407	597.696	464.246	550.19	583.741	426.855	632.643	692.737	535.37	489.262	525.899	608.694	485.644	587.491	447.46	514.687	672.587	458.496	514.976	582.426	601.635	495.986	649.45	481.793	414.564	618.27	549.75	650.667	666.745	618.438
915	857.702	2.9983	305.375	535.8	474.222	383.622	477.203	447.71	442.46	497.284	376.22	514.425	512.726	419.323	431	476.833	520.4	413.18	476.824	393.391	430.258	500.268	442.529	459.412	492.544	452.891	463.151	522.416	421.21	335.317	509.057	432.614	559.424	520.53	483.995
916	332.331	3.03212	206.462	12946.3	11977	10135.7	12043.8	11532.5	11469.6	12239.7	10653.2	12818.3	12690.3	10836.1	9827.73	13023.4	11961.4	10942.7	11488.9	10919.4	13252.1	13065.7	10771	11590.2	11460	11600.7	11531.8	12948.7	11274.8	10647.5	11681.7	11717.3	12391.3	13544	12455.9
917	511.341	3.03212	223.973	133.761	124.025	124.065	118.374	123.056	102.283	103.994	81.4781	119.046	119.597	113.928	115.521	92.7543	93.4831	122.397	124.395	95.7094	97.9548	119.146	99.4312	97.3705	127.042	92.2123	104.734	99.8873	106.769	118.509	116.655	128.986	105.755	103.599	106.83
918	579.437	3.03212	245.532	161.565	130.671	105.66	143.548	102.711	132.437	136.346	125.174	112.006	132.891	124.46	110.218	143.021	131.723	129.722	139.836	104.315	150.952	127.955	101.25	139.531	131.141	123.83	141.637	137.178	93.4227	104.181	141.69	132.954	117.562	128.216	125.22
919	819.427	3.03212	265.127	133.704	85.9043	65.9001	102.023	101.957	97.0464	90.6083	80.908	111.417	123.612	79.9914	88.1238	88.0431	98.7866	75.0439	101.713	79.8801	80.8648	140.4	76.8672	87.9716	86.0713	83.4444	83.2829	127.212	70.8639	71.0345	92.6988	94.7272	102.016	132.959	105.078
920	513.264	3.06592	216.783	210.314	199.923	158.947	202.995	165.072	186.912	202.045	174.944	213.989	215.164	202.355	191.171	192.984	200.756	185.442	199.639	166.148	198.062	172.587	178.228	191.16	179.988	180.546	196.527	198.493	196.869	184.644	191.098	181.477	194.139	221.731	214.404
921	389.119	3.09973	206.78	492.319	489.843	500.288	514.822	486.83	539.992	547.533	492.566	519.105	535.004	463.425	490.235	508.579	484.058	551.527	582.021	471.982	493.095	567.919	432.781	464.602	543.255	545.257	543.234	496.438	512.447	482.032	519.142	490.127	516.529	541.547	523.743
922	453.275	3.09973	207.277	848.822	784.194	733.622	826.167	693.206	754.443	776.616	668.061	762.705	776.834	722.898	735.345	751.937	816.365	763.009	802.847	685.284	709.326	832.003	718.37	695.107	756.84	757.951	721.971	793.963	704.384	701.931	802.628	707.483	804.021	821.217	828.883
923	491.295	3.09973	217.034	580.471	507.994	477.049	513.897	516.884	509.25	486.243	453.395	589.026	555.823	483.63	497.065	544.638	548.489	476.377	545.668	478.885	517.985	552.584	463.178	550.833	515.029	518.91	487.88	543.428	515.927	485.703	539.231	501.657	537.729	596.754	571.575
924	493.315	3.09973	221.327	995.081	899.343	805.759	982.227	837.68	888.502	944.304	817.883	1006	983.656	862.663	848.525	864.999	898.058	887.417	966.844	771.523	862.495	995.617	816.919	858.84	896.019	857.721	879.426	955.919	884.362	815.461	926.224	916.632	973.553	953.266	963.651
925	602.339	3.09973	237.089	1105.41	1035.31	844.591	1041.56	852.352	961.405	967.159	861.206	1087.05	1053.36	903.789	919.626	957.762	939.02	859.876	993.798	849.297	945.712	1136.05	866.858	888.214	947.931	907.997	982.266	1028.37	985.218	846.397	1008.42	920.299	1039.71	1081.25	998.72
926	769.389	3.09973	256.195	499.479	435.031	341.3	440.98	378.969	407.377	433.149	348.86	483.182	460.033	366.278	342.043	434.163	433.926	433.427	471.145	391.596	411.717	495.818	388.719	383.979	421.863	409.484	460.354	439.908	381.641	357.741	412.476	461.433	450.905	519.276	477.874
927	783.492	3.09973	265.328	1353.96	1146.65	839.574	1199.46	946.733	1057.97	1145.1	874.516	1311.28	1279.26	1011.03	990.281	1143.06	1162.13	996.968	1183.87	941.217	1158.98	1270.54	968.923	988.271	1078.58	1060.34	1084.68	1263.69	1046.03	894.76	1226.91	1091	1259.8	1294.97	1217.83
928	819.465	3.09973	272.91	430.564	322.376	251.571	382.747	265.876	278.331	329.352	226.386	362.804	365.355	262.215	290.449	317.37	364.464	270.762	362.003	295.249	275.533	406.441	246.414	309.875	357.177	339.742	294.19	384.557	282.108	236.797	337.481	341.589	364.863	427.991	344.867
929	312.346	3.15332	199.374	11921.8	7748.88	6295.89	7688.37	6540.18	6883.99	7492.82	6244.95	8202.64	8684.09	6608.04	6089.75	8256.73	7256.27	7075.44	7178.31	6327.41	8438.35	7958.76	6229.03	6764.39	6963.6	6884.78	7411.49	8063.48	6666.53	6231.92	7356.85	7377.44	7546.61	8950.7	7207.54
930	359.195	3.15332	187.503	504.304	452.364	400.684	409.787	396.344	411.709	424.152	409.591	454.134	451.866	441.465	415.86	417.209	476.211	402.549	459.764	429.745	416.576	420.963	399.026	392.877	419.32	438.401	455.023	425.473	440.094	433.578	442.667	407.114	454.55	454.745	412.713
931	361.165	3.15332	189.024	1654.3	1540	1366.91	1464.71	1460.39	1451.87	1506.18	1386.5	1500.5	1567.36	1457.65	1453.32	1446.14	1534.06	1467.22	1634.46	1412.46	1558.02	1512.23	1417.76	1388.94	1544.66	1457.68	1477.45	1546.28	1438.2	1402.03	1516.28	1467.02	1474.99	1632.76	1498.26
932	567.392	3.18713	237.413	203.888	171.283	152.498	200.432	172.516	184.993	180.95	175.743	201.784	204.953	195.046	189.516	179.059	217.466	171.324	172.643	175.412	189.616	230.415	189.14	172.785	192.068	144.358	192.164	200.524	183.041	153.556	194.51	193.447	196.344	196.809	184.232
933	601.371	3.18713	231.543	290.987	242.966	228.645	288.766	252.476	270.838	290.343	214.964	268.116	280.942	237.686	266.152	243.458	289.31	225.745	226.34	235.537	270.888	288.557	213.653	219.729	265.234	244.59	248.569	261.567	231.874	203.973	276.509	280.173	299.059	297.952	277.455
934	712.663	3.18713	285.112	79.1228	81.5411	81.651	58.079	69.4491	84.1472	64.5206	61.5542	67.6644	66.3887	92.1768	67.7782	72.2437	64.8425	63.7377	70.0686	66.3525	59.5632	70.5672	67.5459	74.8279	88.5548	70.3543	59.8898	83.6199	64.8084	69.3646	76.3917	66.361	80.5904	79.8603	70.7099
935	803.457	3.18713	266.519	217.918	175.102	125.964	192.643	131.519	195.768	124.089	144.928	186.414	220.109	140.65	172.473	177.467	185.37	163.041	179.68	149.039	159.489	209.352	141.617	134.954	185.574	173.959	170.299	238.216	175.865	145.566	192.663	216.393	239.258	208	186.866
936	405.246	3.22095	200.51	1062.22	969.869	918.659	1003.04	925.407	952.589	998.739	876.997	983.225	1053.41	943.487	940.54	937.882	1039.87	931.095	997.808	903.049	966.909	1041.95	906.02	962.276	996.786	913.938	910.058	962.998	916.163	863.078	1044.07	925.897	991.502	1048.56	974.192
937	415.11	3.22095	215.191	2536.08	1984.61	1623.78	2174.72	1539.12	1889.98	2017.61	1573.65	2107.83	2310.22	1785.69	1670.97	1833.03	2049.98	1644.55	2040.79	1624.83	1936.27	2356.02	1587.95	1678.25	1920.45	1756.31	1854.82	2116.86	1717.95	1520.98	2111.56	1763.05	2173.89	2495.46	1982.6
938	876.661	3.22095	295.39	1000.2	819.45	661.001	833.242	690.743	792.636	787.102	628.041	826.506	916.177	754.361	748.091	765.908	846.173	725.369	824.256	702.171	847.289	982.081	656.218	745.182	810.994	715.447	768.213	847.987	693.94	644.087	889.846	756.666	894.972	892.307	860.051
939	287.089	3.25477	176.403	211.333	196.005	162.412	177.126	171.878	184.636	173.709	178.641	186.993	169.344	165.281	179.248	176.202	177.541	176.496	185.12	163.974	192.853	186.178	174.453	176.158	180.252	179.438	188.069	189.077	154.245	169.457	179.511	178.241	166.56	182.17	216.587
940	347.1	3.25477	184.6	115.059	97.7116	85.2232	98.4928	99.807	101.378	107.315	86.4396	98.7264	97.6612	96.7021	90.7948	113.959	108.761	93.2713	113.456	87.3005	129.72	89.5172	97.4783	116.325	139.015	107.327	108.187	90.4871	99.7723	90.5858	99.1287	109.07	97.0433	101.71	105.938
941	441.219	3.25477	205.959	736.572	688.388	632.44	696.392	665.41	712.127	695.005	660.873	726.357	718.18	603.781	633.797	752.401	770.518	644.372	731.891	696.946	748.496	816.626	605.318	620.656	697.124	723.156	681.892	713.151	683.481	632.053	743.55	674.417	799.765	777.793	777.797
942	754.639	3.25477	286.079	150.79	112.756	102.577	143.968	100.396	105.707	126.011	103.173	130.745	139.654	128.813	106.866	104.636	114.66	108.417	130.535	93.1125	109.613	133.292	85.3453	98.4883	95.9391	102.31	115.356	115.763	102.095	102.441	136.953	120.187	116.476	150.014	109.256
943	921.59	3.25477	296.409	399.014	295.243	246.681	310.813	245.828	314.269	281.232	249.459	326.121	333.662	308.656	262.593	309.026	301.137	302.746	303.673	291.793	305.755	374.868	239.46	279.493	310.666	308.002	304.608	390.839	296.252	255.755	367.619	288.377	366.145	359.278	396.584
944	277.171	3.30835	178.307	318.631	334.401	296.149	329.515	310.46	297.695	312.138	308.537	307.221	329.376	311.507	293.994	302.152	322.231	303.231	352.649	298.262	343.101	325.803	285.875	304.712	337.455	303.635	301.321	299.278	300.152	287.807	326.871	298.028	316.752	327.735	318.722
945	337.112	3.30835	186.378	505.446	453.547	430.531	471.983	447.198	451.455	500.069	451.92	485.178	460.34	435.505	458.705	446.737	465.187	450.096	505.288	473.491	450.128	429.603	460.931	465.572	468.161	453.969	473.77	449.026	479.944	439.431	413.081	439.772	443.983	479.83	532.203
946	360.111	3.30835	187.485	197.051	175.262	156.13	172.222	140.205	167.574	165.645	162.467	175.096	177.494	148.53	154.841	156.337	183.466	143.01	188.566	167.97	174.734	182.287	171.035	142.163	182.707	151.126	162.481	182.794	153.673	148.483	190.79	148.212	176.014	184.43	163.014
947	429.121	3.30835	216.427	559.079	460.329	385.261	513.738	386.423	438.816	510.772	398.06	522.687	529.284	416.889	383.447	398.653	486.614	395.135	519.142	355.938	446.516	573.144	395.955	410.103	469.569	424.301	413.796	475.593	397.893	366.604	518.35	445.546	492.275	597.355	473.982
948	439.272	3.30835	213.356	254.417	261.208	198.639	281.645	239.536	262.415	240.759	218.698	259.803	249.978	237.533	239.605	268.625	268.002	234.35	260.062	231.283	240.513	251.055	187.294	243.196	257.48	261.619	253.812	280.871	224.751	229.074	296.292	221.757	245.041	286.335	264.275
949	747.389	3.30835	250.994	419.189	339.234	278.665	379.821	243.748	324.645	365.248	286.386	351.97	359.65	321.47	313.448	321.623	332.238	306.334	365.824	308.017	313.905	359.676	279.123	274.6	327.864	298.704	328.246	348.178	289.747	284.237	368.168	318.665	346.886	382.076	396.2
950	819.44	3.30835	274.198	273.94	209.48	134.625	206.605	151.911	169.834	183.387	121.309	231.593	196.213	177.134	161.967	181.545	189.787	170.038	200.175	137.573	180.596	208.054	143.851	192.027	182.625	179.321	191.782	206.854	161.979	149.039	195.246	187.47	221.134	224.285	208.198
951	85.9404	3.34217	162.402	23.2695	284.077	45.3456	582.033	62.7452	114.467	247.527	42.6573	606.06	396.435	107.001	76.5669	154.516	343.264	104.698	294.786	59.7018	236.02	239.392	55.6721	83.9304	216.053	127.626	125.841	634.31	90.426	40.2352	379.564	111.996	603.231	98.6236	518.043
952	325.113	3.34217	178.703	201.306	215.747	226.145	241.208	219.095	217.587	197.419	237.102	206.146	248.286	183.581	245.586	196.787	207.382	226.982	199.889	201.068	235.346	181.61	236.454	219.231	249.394	202.978	239.953	238.171	209.649	193.597	226.922	252.424	197.175	221.266	200.423
953	349.061	3.34217	184.562	183.082	193.426	187.638	227.961	207.483	185.526	212.143	229.082	205.192	165.163	202.746	185.237	171.891	209.736	201.946	236.545	188.666	205.738	192.654	219.296	204.489	207.46	194.88	217.959	189.777	224.063	185.782	209.305	186.641	196.671	207.682	186.334
954	491.36	3.34217	218.476	970.07	790.73	711.707	831.384	724.354	777.702	826.213	729.601	899.869	832.57	800.215	773.8	825.346	853.685	718.903	852.064	748.834	839.74	972.857	715.322	807.325	818.12	832.808	808.19	894.179	794.054	699.564	888.676	802.95	846.525	985.21	887.986
955	497.318	3.37598	224.137	682.794	672.057	566.585	661.633	584.413	619.813	669.029	604.445	697.289	692.253	568.889	630.84	638.107	658.651	566.664	631.113	572.33	654.619	656.427	632.726	597.837	663.768	622.61	645.938	686.317	558.029	548.653	677.666	652.891	686.012	690.256	683.256
956	513.314	3.37598	221.096	926.792	874	745.666	900.726	799.921	799.828	874.097	752.078	867.05	931.516	838.233	803.048	882.143	876.343	808.384	854.07	810.698	856.592	983.762	754.622	835.539	886.167	828.946	858.962	954.91	793.451	776.701	895.19	854.066	847.319	979.194	890.485
957	699.489	3.37598	256.645	625.293	620.71	503.681	620.818	530.766	594.919	607.587	512.972	671.49	664.008	545.445	558.574	551.166	620.469	548.685	594.738	534.043	615.507	668.758	561.776	521.497	615.414	623.508	611.456	598.705	553.179	507.315	622.245	575.461	669.43	679.113	584.019
958	741.388	3.37598	257.691	580.993	528.366	416.788	500.051	431.113	502.101	474.198	453.763	575.842	549.082	477.297	486.712	497.349	525.568	391.41	502.008	435.988	505.209	508.252	408.516	435.745	492.626	490.11	542.009	563.649	434.718	433.586	534.518	504.237	517.341	556.857	568.626
959	803.469	3.37598	267.82	204.281	163.533	107.768	166.15	106.68	132.993	156.105	115.587	186.172	177.285	153.115	155.63	166.18	161.67	123.172	172.378	134.651	173.896	171.814	133.424	129.6	168.615	172.653	143.148	212.467	150.329	128.565	172.274	170.941	163.126	189.738	162.071
960	939.514	3.37598	296.326	1096.23	788.189	593.994	777.858	653.367	909.988	797.171	533.322	998.713	921.617	911.147	807.897	1208.74	986.013	931.335	1022.43	989.134	939.358	1067.1	684.112	1149.1	1107	1376.01	1078.93	1342.66	870.097	773.265	961.682	1731.24	1020.56	1041.44	1523.47
961	549.406	3.40978	237.596	285.094	226.349	213.065	275.413	205.517	240.067	243.03	229.891	273.334	306.441	231.01	218.743	248.3	252.157	219.144	269.023	221.667	247.639	236.772	223.656	248.699	258.079	222.319	222.874	264.025	231.762	202.785	253.1	241.875	254.272	252.123	260.207
962	651.533	3.40978	266.254	1566.22	1471.93	1193.81	1272.01	1365.56	1351.55	1332.63	988.549	1859.47	1655.22	1731.88	1759.44	1892.57	1768.24	1802.74	1459.38	2100.03	1604.61	2122.4	1148.01	1742.65	1533.58	1550.05	1687.32	2952.21	2599.28	2107.72	2654.5	2480.57	2682.24	1573.39	3057.24
963	707.366	3.40978	244.506	1098.69	995.151	755.627	1007.8	839.779	932.739	958.018	755.593	1032.93	1040.9	887.515	846.496	875.02	1015.15	901.092	1038.88	848.74	1023.99	1054.36	852.056	936.964	986.269	905.052	923.927	1050.07	860.195	884.795	1017.42	986.945	1067.5	1055.6	1031.72
964	721.45	3.40978	260.466	2240.08	2216.15	1873.53	2292.44	1803.68	2011.19	2146.55	1822.64	2176.74	2277.86	1937.05	1831.79	1956.99	2111.21	1838.18	2120.43	1793.59	2101.51	2182.49	1865.24	1765.55	2245.77	2058.07	2108.25	2145.51	1804.92	1779.13	2180.15	2009.91	2101.61	2229.67	2013.42
965	753.376	3.40978	252.296	153.135	110.14	105.404	146.843	109.503	121.057	141.314	104.626	142.161	102.714	102.547	104.021	98.0574	130.541	108.294	148.187	114.965	125.739	128.014	100.631	107.006	112.194	100.87	118.464	146.892	116.385	107.462	144.77	115.755	136.716	115.423	134.393
966	835.466	3.40978	270.241	163.474	110.827	92.6134	125.23	93.5921	126.594	139.189	86.3487	112.28	132.016	92.1113	101.027	118.858	147.592	121.235	143.499	139.236	135.174	143.807	96.7979	94.9755	124.721	130.53	106.296	130.223	106.982	99.3309	131.911	147.168	129.672	162.78	142.058
967	965.571	3.40978	302.382	250.776	213.045	136.716	205.156	141.728	179.042	177.148	128.629	218.478	224.535	180.097	151.552	202.456	202.151	162.338	230.062	151.733	202.673	213.669	146.46	186.892	233.306	228.137	183.473	256.901	139.246	142.235	229.965	213.194	237.323	232.086	230.88
968	363.241	3.46338	196.695	151.824	121.58	113.149	138.852	142.655	102.971	121.679	133.077	113.775	133.468	104.165	144.771	106.188	116.202	119.55	145.58	107.86	120.274	133.593	123.408	123.391	129.693	124.684	117.664	129.103	102.287	95.8437	134.73	136.026	130.114	123.688	144.565
969	461.281	3.46338	208.649	281.073	251.424	228.434	274.857	223.037	241.445	237.626	240.911	261.515	271.41	247.293	251.135	259.33	246.92	247.988	268.206	256.179	255.412	293.876	241.928	228.745	236.349	257.002	246.952	272.18	214.786	184.522	252.207	270.78	262.949	247.129	260.094
970	493.321	3.46338	222.758	790.391	752.986	670.438	776.478	693.435	752.352	751.052	675.412	768.671	800.768	714.094	718.635	682.1	799.556	709.679	816.344	690.35	736.915	775.689	670.038	740.314	746.134	742.788	736.057	756.532	702.164	679.53	788.763	733.572	807.011	808.43	776.016
971	623.501	3.46338	258.577	932.152	878.057	672.9	707.095	787.768	772.802	672.068	578.059	1364.92	1129.6	1068.41	1041.55	1377.05	1154.89	1259.39	999.379	1502.3	1092.88	1464.36	757.467	1339.25	1064.26	1242.9	1309.84	2373.72	1829.2	1604.05	2053.76	1977.76	1853.53	1063.27	2284.43
972	625.52	3.46338	259.887	8419.95	8705.57	7490.84	5410.41	8162.35	6863.1	6561.68	4304.77	16811.1	10699	13323	14624.9	16839.3	12072.1	18597	8208.35	20085.5	11411.3	17984.6	6094.71	16252.9	10504.5	13051.2	15746.5	32151.7	31597.8	23677.5	29948.9	24835.4	28615.1	8919.38	30214.3
973	625.772	3.46338	259.884	0	0	0	0	1.70448	0	0	0	20.8693	5.1185	5.58829	12.9631	35.3214	1.79455	37.7637	0	43.4171	0	36.1653	0	21.5064	3.16208	9.44492	29.8807	136.041	131.521	69.8773	128.946	46.9951	119.004	0	114.662
974	627.537	3.46338	263.834	29967	35909.4	32501.7	17597.5	38782.4	30277.4	24660.7	14513.4	48740.7	42506.9	59866.7	56045.5	59759.2	54820.7	63807	25794.7	88073.7	59451.2	58055.8	33341.8	60573.3	39613.3	43762.1	44600.7	79007.7	68936.9	66736.6	54964.1	76181.4	59816.9	31550	71540
975	627.789	3.46338	263.832	80.9723	110.647	91.8621	7.06067	130.581	80.4878	32.2149	3.81422	248.516	174.266	352.017	319.608	343.659	299.525	410.818	65.9136	739.501	346.961	342.002	115.544	367.796	183.849	196.603	215.563	590.352	448.434	435.476	318.73	574.102	350.095	89.1863	491.54
976	627.896	3.46338	263.831	0	0	7.75443	0	10.2641	4.28553	2.69531	0	45.4613	13.4675	58.0117	93.2673	51.0105	37.4849	82.0881	0	158.021	53.2462	93.6491	9.57168	32.7458	27.0029	16.8761	11.1755	111.647	67.5911	90.28	33.5954	104.822	71.6148	0	97.3755
977	627.985	3.46338	263.83	2.46975	8.099	13.2531	0	10.8936	0	0	0	53.9737	29.0263	92.4959	152.687	78.2314	67.8836	108.25	0	264.275	88.0616	150.09	32.993	103.227	46.2853	26.8665	29.7704	174.696	128.975	131.222	46.5142	158.798	132.71	2.47348	129.133
978	628.126	3.46338	263.829	0	0	6.57938	0	9.8905	3.79932	0	0	34.4264	28.9353	65.8856	98.9851	63.8343	46.1703	76.3781	0	188.931	61.6874	108.906	25.1626	74.9314	36.0268	22.8535	22.0937	117.106	83.7092	90.6347	41.2863	118.853	86.9246	5.96542	90.9149
979	628.241	3.46338	263.828	12.1952	8.1976	13.7236	0	17.9805	6.4779	0	0	58.9221	26.0975	78.679	137.312	95.5321	62.9919	112.084	0	231.041	92.3107	164.73	26.2793	105.699	46.5238	41.8483	43.39	179.914	138.533	142.184	64.5209	145.555	133.262	0	150.063
980	803.509	3.46338	274.288	571.244	414.799	317.723	457.142	312.444	350.771	439.26	292.717	505.554	467.144	441.162	377.972	465.56	450.493	373.985	478.513	373.31	462.761	490.383	375.698	398.752	424.193	420.315	449.849	496.655	405.382	362.329	506.902	464.788	495.485	507.732	462.653
981	823.423	3.46338	265.106	236.636	187.688	116.689	177.296	132.308	158.244	170.989	131.93	186.424	205.272	122.566	122.17	163.313	156.788	164.708	159.388	134.451	157.619	201.865	128.64	151.676	179.037	153.897	164.091	180.448	147.025	133.594	180.665	163.878	196.597	185.262	185.991
982	831.567	3.46338	283.073	85.0328	89.5038	57.125	51.7482	60.3113	51.1734	93.3201	71.359	69.0727	78.6597	64.5594	59.1957	70.8115	80.4671	75.3243	81.0669	66.3704	84.9468	98.0703	38.5271	63.6721	83.4725	72.8224	77.5667	86.3688	86.4543	68.7209	88.1747	83.7639	106.279	105.312	118.595
983	887.562	3.46338	295.334	2335.54	2306.2	1930.33	1647.24	2089.43	2012.3	1873.81	1244.29	2966.09	2692.04	3106.15	2915.49	3340.09	3107.85	3418.69	2037.46	4257.15	3310.54	3350.5	1960.23	3253.56	2503.5	2659.04	2602.55	4348.43	3528.94	3245.32	3264.55	4060.45	3510.21	2446.68	4171.62
984	893.574	3.46338	296.546	690.416	524.397	385.744	502.199	380.865	457.426	484.188	327.501	563.236	562.124	473.263	470.563	490.35	511.979	467.657	431.809	433.459	464.101	577.181	374.824	425.612	480.863	448.084	474.808	621.16	528.104	435.269	547.531	506.745	611.462	550.921	585.877
985	907.531	3.46338	295.235	5365.89	4216.85	3416.45	3053.65	3613.24	3274.42	3392.54	2138.84	8357.54	5699.71	6018.94	6275.51	7133.2	5903.61	7822.41	4107.09	8349.36	5334.82	9310.07	2713.78	6734.68	5050.75	5523.21	6941.25	15533.4	13529.9	9718	14525.6	10355.4	13688.6	5259.03	14221.6
986	907.619	3.46338	301.423	889.772	691.225	693.791	599.979	649.799	641.936	713.55	523.784	1180.37	1056.2	1082.9	1097.05	1045.54	995.747	1194.62	787.616	965.998	864.932	1250.01	574.632	1042.82	857.373	800.598	873.237	1436.15	1841.6	978.292	1646.4	1024.23	1140.66	974.999	1706.39
987	909.547	3.46338	298.944	17578.6	17743.8	14103.9	9709.94	16741.1	13774.2	12397.1	7129.3	25314.3	23084.6	27892.5	25310.6	26930.2	27787.7	29394.6	13548.7	40883.8	27981.2	32419.5	14948.1	27181.7	19524	20307.4	20554.6	40584	31854.5	29651	28864.6	36037	31614	18348.6	36845.9
988	913.579	3.46338	298.925	828.414	708.981	515.803	534.54	608.379	589.234	614.279	409.305	704.371	718.495	705.306	589.996	738.18	751.762	685.393	646.071	633.319	645.243	738.69	405.946	640.331	643.634	651.863	623.38	943.582	619.206	618.739	771.78	878.966	783.956	740.593	841.462
989	915.583	3.46338	296.438	250.763	192.737	153.482	187.198	156.796	201.048	192.843	123.806	212.615	241.938	156.413	171.953	230.967	199.102	183.914	233.873	177.024	216.518	237.391	141.608	227.883	187.125	207.287	198.307	284.048	171.775	133.79	215.145	234.728	261.569	204.887	300.262
990	923.501	3.46338	295.158	1239.26	1499.54	1403.34	985.972	1558.87	1471.95	1216.25	934.254	2293.05	1460.51	2401.72	2613.88	2784.91	1863.66	3178.6	1571.56	3415.3	1876.95	2125.74	1290.46	2864.7	1909.34	2336.09	2770.61	4231.36	5198.81	4078.9	4118.81	4416.83	3342.12	1262.81	4086.21
991	925.515	3.46338	298.867	4431.67	6755.02	6965.09	3557.81	8165.82	6471.52	5010.38	3456.09	7602.97	6306.27	12480.5	11778.1	11893.5	9611.72	13118.6	5244.69	19364	11219.2	7940.76	7445.32	12923.5	7976.68	9274.91	8973.51	12544.2	14815.2	14312	9662.18	16581.7	9231.16	4860.03	12250.5
992	929.515	3.46338	295.13	2596.2	1721.13	1226.83	1207.91	1418.79	1405.28	1352.61	895.601	2894.35	2187.42	2020.53	2012.94	2587.9	2389.21	2526.89	1632	2654.77	2078.91	3431.08	1051.18	2261.09	1782.29	2054.31	2524.14	4959.66	4020.33	3074.12	4838.44	3404.64	4618.63	2137.34	4730.64
993	931.528	3.46338	300.074	8230.92	6826.37	5113.02	4298.21	5828.69	5405.56	5002.05	3031.12	10036.7	9528.43	9526.33	8676.94	9677.41	10793.9	10164.2	5915.07	12818.6	10105.7	13156.8	5457.1	9104.55	7591.63	7681.14	7664.18	15298.1	10773.6	9750.97	10951.1	12248.2	12101.1	8191.16	13894.1
994	935.56	3.46338	301.288	1154.88	948.747	664.505	811.414	678.686	823.587	908.027	547.778	1014.61	964.77	889.306	894.194	1199.96	1042.6	932.795	893.159	855.557	834.844	1168.43	564.44	920.647	939.375	974.141	1032.3	1425.68	1067.8	848.253	1220.25	1304.08	1149.28	1025.1	1395.23
995	943.485	3.46338	291.328	300.28	366.241	150.102	371.028	214.668	230.824	295.67	120.803	836.243	565.524	371.913	348.529	415.757	599.249	420.204	390.642	445.869	492.619	600.156	201.693	421.185	403.174	399.595	373.134	1430.74	422.355	329.371	782.385	573.815	1105.44	338.437	1135.32
996	945.488	3.46338	297.538	785.897	717.041	437.252	595.752	508.024	513.228	549.134	270.022	1355.92	991.899	812.415	842.428	979.228	1023.19	1027.72	765	1020.12	823.175	1353.35	440.73	982.072	879.855	922.617	955.819	2262.48	1482.68	1190.47	1817.6	1499.29	1978.48	783.261	2149.89
997	947.506	3.46338	302.463	2409.56	2676.42	2016.51	1701.36	2376	2143.15	1993.54	1271.72	3476.88	3268.98	3641.87	3205.84	3633.34	3792.28	3812	2213.63	4745.31	3558.26	4056.56	2113.18	3564.77	2845.88	2883.9	3132.14	5127.23	4010.84	3747.54	3786.67	4770.68	3957.4	2851.33	4685.84
998	957.538	3.46338	302.417	515.658	381.015	210.394	321.728	265.127	313.615	340.554	223.203	424.283	409.866	391.599	328.233	632.175	432.384	527.098	537.26	498.113	454.814	547.087	279.474	578.071	571.856	687	466.948	753.471	406.365	334.174	524.224	910.264	517.863	402.402	797.764
999	983.471	3.46338	303.531	322.734	465.995	395.245	252.585	466.137	423.193	352.965	194.917	434.924	359.453	732.238	724.79	738.575	568.566	783.652	392.686	1102.16	704.52	343.243	452.161	784.238	494.408	612.355	642.698	739.228	892.753	832.896	703.692	1084.87	476.415	314.51	774.037
1000	1007.51	3.46338	308.318	223.016	207.107	176.542	153.968	218.032	171.579	175.666	69.4446	301.921	195.534	337.948	339.563	400.899	304.625	423.472	210.081	603.558	380.216	246.066	212.837	390.199	301.247	353.593	343.716	462.311	489.819	435.231	361.763	519.975	331.784	172.422	442.761
1001	1010.49	3.46338	307.087	158.917	253.299	236.324	140.668	284.609	262.132	195.252	114.341	251.888	171.238	441.864	471.683	472.52	347.403	481.473	260.777	716.215	436.075	229.961	276.601	503.045	355.161	417.727	419.819	444.852	554.441	527.742	342.233	654.112	324.701	174.887	514.032
1002	1016.51	3.46338	307.063	475.378	367.833	218.512	270.802	262.785	256.476	250.942	83.5648	661.932	557.666	440.427	440.203	407.813	654.71	480.949	320.854	661.569	501.252	786.521	242.108	495.865	351.918	366.288	385.498	925.82	543.467	439.079	662.264	655.153	691.492	520.957	820.224
1003	1032.48	3.46338	309.434	172.639	119.547	74.0182	63.1041	101.193	95.7116	76.3948	23.3817	246.614	222.822	225.282	198.188	214.886	283.919	236.086	109.704	322.387	262.868	322.262	109.164	197.203	185.16	158.08	150.456	407.299	229.883	226.66	277.666	314.431	302.171	195.147	361.424
1004	1047.44	3.46338	311.801	88.2998	40.0745	51.676	41.262	40.154	54.9087	22.6428	2.10773	117.228	107.49	110.915	90.5355	114.053	102.242	91.0149	41.4216	163.336	115.889	232.115	31.3392	103.131	93.3002	77.0899	63.0844	242.751	154.651	112.618	183.61	166.023	218.227	88.856	198.581
1005	450.427	3.49718	233.263	294.181	216.182	179.854	188.071	203.039	226.444	221.225	149.51	441.669	408.167	275.111	298.47	334.881	256.691	269.09	272.231	310.851	263.556	338.297	202.557	326.538	295.183	260.83	284.066	407.39	236.672	264.203	335.85	524.874	286.793	434.037	736.164
1006	655.571	3.49718	270.14	900.063	901.793	746.503	769.291	808.537	788.225	865.812	664.363	731.419	784.668	934.099	904.226	840.568	857.413	863.844	849.552	825.39	733.126	810.691	590.079	787.336	739.218	740.839	741.283	934.361	803.5	737.692	843.177	940.44	798.276	691.545	958.714
1007	909.457	3.49718	297.707	417.11	429.402	319.548	312.441	360.477	349.427	385.059	223.422	369.928	407.185	358.168	385.517	376.228	450.118	352.472	347.038	411.173	429.952	512.543	302.761	352.781	391.416	386.526	365.918	551.211	434.102	568.67	435.311	502.812	509.958	424.135	456.492
1008	937.572	3.49718	302.509	574.18	434.173	299.644	410.92	295.543	330.546	415.196	237.057	481.001	451.898	416.615	387.873	448.872	453.246	419.17	395.32	378.601	396.029	447.92	194.064	363.778	379.863	319.716	377.285	536.992	385.958	308.408	473.321	471.769	483.359	398.094	491.523
1009	947.585	3.49718	298.765	2706.7	2270.62	1778.34	1932.34	1920.25	1994.84	2157.64	1497.6	2458.27	2437.82	2371.72	1956.14	2519.91	2594.07	2334.04	2136.12	2323.51	2553.87	2508.46	1774.29	2298.56	2051.26	2156.45	2207.25	2766.46	2413.63	1995.38	2513.23	2504.22	2354.75	2422.11	2750.53
1010	989.489	3.49718	308.394	871.959	709.782	419.086	433.435	514.282	626.067	470.136	251.585	1020.07	971.19	920.543	887.082	1107.53	1021.15	1076.61	858.355	1324.28	1033.05	1352.46	639.031	1126.36	955.733	1141.46	898.549	1885.31	1081.31	942.584	1241.7	1604.27	1235.06	917.212	1614.05
1011	1005.49	3.49718	307.108	501.283	414.784	268.516	275.34	292.429	393.952	314.47	178.519	610.815	528.74	580.72	543.502	798.398	593.814	650.998	805.935	800.624	647.119	771.325	423.193	919.704	775.622	1029.81	659.508	1252.41	585.422	601.901	722.261	1294.59	745.282	450.313	1216.77
1012	329.175	3.531	181.807	2242.86	1939.69	1722.7	1963.16	1768.75	1885.04	1925.55	1737.03	1958.34	2038.58	1834.6	1848.41	1875.68	1925.7	1809.66	1957.68	1771.9	1864.01	2036.92	1784.85	1797.04	1893.3	1865.34	1880.66	1965.98	1856.55	1761.3	1960.2	1881.76	1989.52	2188.08	1942.94
1013	347.099	3.531	183.022	221.321	221.836	199.488	217.946	187.344	203.362	219.86	215.461	191.893	202.75	179.358	157.687	201.806	185.57	183.665	202.191	179.894	226.964	205.824	179.204	166.526	323.071	178.191	189.997	190.557	178.517	183.498	194.55	168.514	173.406	209.181	203.092
1014	433.319	3.531	210.508	643.126	644.883	531.117	644.186	572.957	570.758	624.095	509.38	614.974	613.47	593.334	566.306	584.45	629.196	572.871	603.836	543.054	645.168	642.752	527.375	567.712	596.588	558.697	551.114	668.78	563.069	529.207	654.918	573.485	645.264	682.379	635.387
1015	439.214	3.531	203.007	1315.07	1222.19	1147.65	1269.79	1107.55	1221.39	1207.77	1131.52	1337.96	1321.93	1192.84	1149.01	1244.59	1228.25	1120.24	1248.89	1151.67	1216.45	1269.11	1119.16	1165.88	1285.06	1185.07	1225.03	1257.55	1168.97	1059.03	1312.03	1206.64	1285.49	1287.46	1268.56
1016	447.186	3.531	202.899	391.918	395.848	376.313	397.673	380.237	396.157	376.401	394.765	390.042	388.934	367.671	383.271	387.687	405.143	382.872	401.687	380.381	432.81	390.865	412.722	381.355	388.783	325.797	419.332	374.477	405.959	348.119	414.498	399.043	405.493	420.389	379.17
1017	453.281	3.531	210.227	1681.92	1385.28	1227.77	1421.84	1288.21	1338.6	1401.74	1144.37	1471.07	1464.6	1302.27	1310.83	1253.9	1438.5	1331.83	1415.61	1276.27	1400.76	1489.29	1240.67	1262.34	1398.71	1336.68	1330.49	1412.19	1305.62	1197.03	1387.13	1285.16	1415.44	1490.9	1517.93
1018	599.504	3.531	257.467	4561.46	4974.52	4386.29	2960.54	4841.65	4128.2	3291	2345.6	7768.17	6029.85	8267.88	8295.16	8862.51	7717.21	9009.9	4302.12	11771.5	7562.25	8966.32	4094.19	8095.47	5709.51	6477.81	6655.68	14876.5	12338.6	10362.2	10759.5	14105.2	11629.4	5314.55	13812.9
1019	623.302	3.531	228.565	439.568	354.89	328.385	385.78	352.804	371.128	359.521	340.4	384.414	418.812	325.504	344.361	368.506	391.741	347.333	405.394	332.165	361.116	416.897	288.379	352.27	359.727	364.156	342.01	420.229	342.35	312.694	398.046	347.308	384.501	365.319	418.781
1020	851.465	3.531	267.566	1823.38	1409.05	978.646	1384.93	1116.34	1227.82	1423.77	1019.01	1589.01	1607.89	1281.07	1175.56	1376.67	1442	1221.38	1430.45	1201.52	1457.69	1615.74	1085.78	1304.44	1526.18	1372.34	1414.5	1751.34	1287.66	1123.83	1606.28	1542.53	1641.12	1737.68	1700.26
1021	863.603	3.531	296.702	224.509	173.585	114.985	172.338	146.191	166.434	164.333	108.848	219.537	187.525	159.815	168.211	184.246	199.676	173.956	172.649	190.534	203.779	196.509	127.301	186.604	187.164	159.683	195.434	233.756	171.071	163.327	238.242	194.891	259.935	220.942	228.599
1022	881.517	3.531	291.623	2871.76	2823.27	2212.78	1910.92	2339.14	2278.29	1992.12	1444.98	4272.51	3462.79	3890.48	3804.35	4314.09	3989.74	4196.1	2641.35	4986.51	3859.19	4900.42	2244.45	3953.97	3110.19	3413	3436.51	7437.9	5605.36	4600.23	5701.96	6228.5	5996.37	3347.77	6699.88
1023	897.486	3.531	292.793	1332.56	1430.71	1237.5	1019.63	1367.96	1341.21	1152.36	834.495	1736.76	1440.52	2099.92	2010.51	2259.93	1870.34	2286.3	1517.44	2668.34	1978.71	1839.5	1237.92	2219.17	1608.95	1862.82	1885.78	2917.48	2703.51	2465.27	2385.34	3452.06	2122.19	1422.9	2879.29
1024	963.489	3.531	302.391	177.18	169.236	137.077	115.879	157.76	169.447	110.569	85.0207	223.503	193.778	252.807	241.812	259.992	227.855	253.456	192.295	343.736	251.475	274.966	167.3	291.388	251.045	275.224	215.932	426.284	244.688	268.544	277.085	392.323	338.603	192.407	355.019
1025	965.491	3.531	294.969	153.552	160.471	76.761	117.529	93.267	116.19	109.06	66.4156	209.313	158.668	100.347	128.61	171.199	170.757	142.357	146.199	157.071	154.027	188.477	90.9452	122.535	165.747	128.7	134.473	299.989	128.581	132.23	193.832	201.844	211.154	163.484	217.97
1026	987.475	3.531	305.963	234.35	160.202	85.157	116.733	105.982	129.41	199.917	61.6876	320.776	236.113	181.669	207.554	261.028	241.904	228.621	247.065	268.56	202.268	349.485	110.571	234.25	209.594	237.331	245.111	492.631	334.088	291.041	424.797	474.88	435.47	211.996	561.195
1027	343.093	3.56482	183.102	1467.98	1172.82	978.648	1269.89	987.91	1070.92	1135.99	971.171	1264.52	1384.75	1052.75	875.796	1061.93	1234.46	955.393	1285.84	1029.97	1168.41	1359.21	1020.85	975.512	1031.53	978.448	1128.36	1239.09	920.614	1013.87	1251.08	1079.28	1366.36	1331.32	1169.88
1028	579.267	3.56482	226.122	220.89	183.804	154.572	194.753	146.906	167.55	170.423	166.895	192.16	200.39	183.931	189.891	191.564	202.511	174.815	219.647	168.993	196.167	202.067	146.955	174.913	195.756	184.915	187.577	209.814	178.71	175.695	209.347	193.918	184.024	210.872	200.65
1029	785.568	3.56482	283.342	378.582	274.642	241.503	315.066	264.583	288.127	310.133	263.13	340.888	349.06	301.547	304.689	332.076	335.449	300.646	275.537	256.641	279.448	344.467	254.677	278.306	306.27	303.679	266.17	313.411	297.756	236.813	325.252	294.124	335.292	312.415	337.832
1030	799.502	3.56482	278.16	1447.92	1189.92	995.898	1227.5	962.488	1064.74	1219.59	965.389	1279.92	1392.48	1102.65	1038.37	1139.1	1257.31	1101.47	1270.81	1021.06	1264.98	1371.04	1003.77	1052.54	1197.11	1173.52	1165.55	1326.83	1066.83	1001.85	1307.27	1221.54	1281.92	1400.42	1437.46
1031	921.503	3.56482	292.677	444.58	367.725	252.129	296.862	234.289	319.058	316.4	214.875	370.783	397.68	336.574	357.196	365.154	401.751	402.062	309.786	371.151	388.921	489.127	276.586	361.755	397.66	407.007	388.569	605.585	460.256	393.591	492.215	588.556	545.781	453.547	541.614
1032	965.545	3.56482	301.152	247.55	176.055	132.107	165.354	129.373	128.948	172.376	108.374	215.167	227.975	158.026	165.979	172.309	227.78	161.668	192.565	145.643	196.331	225.132	148.045	188.258	217	186.879	150.529	262.434	137.93	147.364	228.539	205.937	269.945	212.338	215.784
1033	973.528	3.56482	304.8	588.64	440.27	276.555	335.334	249.726	462.688	356.245	245.882	619.023	600.008	584.731	519.429	880.763	632.601	678.282	989.318	799.222	645.388	903.354	530.728	1064.41	956.239	1355.84	760.135	1247.99	426.663	506.187	737.948	1390.09	641.486	489.571	1300.41
1034	251.087	3.6184	167.597	283.385	242.546	239.858	229.423	219.018	204.387	222.066	236.111	193.769	220.59	229.952	262.965	218.65	245.851	220.333	242.717	195.937	245.873	225.178	231.206	234.531	214.327	219.623	229.129	225.202	195.255	198.714	236.902	226.923	226.988	246.014	206.153
1035	627.608	3.6184	263.834	749.624	630.255	730.941	601.728	914.917	630.07	580.333	542.159	780.783	747.567	1118.87	1404.58	1205.95	1383.64	1257.26	779.572	947.206	980.69	1054.59	762.75	1059.61	812.08	959.945	777.78	1080.95	1412.43	994.01	1265.03	929.427	725.292	828.018	1374.44
1036	651.409	3.6184	240.814	9978.25	8706.68	7371.08	8970.19	7704.69	8268.96	8847.67	7398.92	9101.35	9259.54	8107.26	7833.44	8352.25	8824.34	8071.94	8922.72	7601.44	8766.91	9363.06	7700.69	7879.05	8607.52	8296.79	8379.67	9145.31	8103.2	7350.25	8999.06	8441.98	9138.5	9450.84	8848.1
1037	709.392	3.6184	243.134	222.032	193.866	147.748	155.728	175.18	190.48	183.413	131.513	195.099	195.66	169.418	177.433	200.087	171.408	178.982	166.563	185.313	180.141	189.655	193.45	186.165	180.614	186.103	208.347	202.262	167.281	185.755	199.497	172.266	216.103	189.829	202.778
1038	831.674	3.6184	304.298	291.571	236.634	209.101	257.98	208.917	211.944	228.529	187.742	271.111	266.781	214.479	201.215	232.074	261.655	182.092	215.208	190.221	224.547	265.592	191.162	221.594	241.392	208.991	229.375	245.974	207.725	175.785	254.978	216.513	230.994	304.742	237.959
1039	877.653	3.6184	306.49	381.298	329.931	304.122	347.302	295.346	321.686	324.355	301.854	399.385	385.71	342.887	344.775	362.129	380.552	306.312	324.006	321.999	368.452	411.478	291.007	306.152	352.235	304.582	351.725	403.355	329.125	279.323	395.517	370.58	400.821	467.078	383.184
1040	941.52	3.6184	288.834	474.936	400.447	289.948	361.658	313.997	463.056	363.41	208.436	706.247	572.241	625.07	590.564	876.764	673.29	702.385	733.308	876.035	645.172	744.992	467.373	1053.37	826.058	1209.94	741.443	1314.42	511.901	593.386	792.884	1377.95	908.441	520.565	1300.27
1041	609.328	3.65222	224.452	668.704	420.541	324.525	438.097	337.609	399.041	363.443	328.246	447.564	554.54	416.125	368.185	373.887	445.138	359.579	445.207	382.535	394.229	524.559	356.247	339.602	408.218	385.573	368.624	459.129	381.865	335.085	471.129	371.005	502.209	489.178	414.208
1042	755.47	3.65222	262.878	1259.41	1134.38	867.68	1149.55	901.11	1017.16	1073.12	856.324	1262.42	1226.94	987.544	960.212	1027.53	1155.31	1013.83	1186.41	989.399	1038.11	1190.33	929.621	992.731	1114.8	1059.11	1006.44	1171.63	1036.36	884.49	1205.85	999.797	1232.15	1289.1	1214.64
1043	283.213	3.68603	184.557	207.893	202.199	197.132	218.999	195.442	184.572	205.273	194.45	212.692	232.781	186.64	183.738	200.947	236.359	190.337	182.478	190.19	203.172	251.989	223.654	213.477	190.093	203.038	209.559	196.746	194.814	208.21	186.201	187.64	215.791	242.222	226.601
1044	287.092	3.68603	176.403	189.446	174.685	169.633	168.819	174.945	160.756	179.995	152.92	170.331	161.489	160.053	154.653	161.923	182.285	152.214	176.007	155.299	152.98	171.003	156.362	181.61	170.237	170.031	165.535	163.072	170.004	163	158.48	168.009	176.622	177.132	149.593
1045	345.08	3.68603	178.292	105.37	98.8296	92.6342	108.121	83.218	113.201	99.5589	95.2366	103.567	94.4033	88.5301	86.3891	94.9859	95.0118	91.7552	103.161	80.1197	103.901	77.1868	90.155	92.2018	108.764	86.7447	105.784	89.0772	102.173	94.5915	87.4013	113.245	108.641	94.34	113.443
1046	752.416	3.68603	260.266	310.745	269.57	226.346	271.261	224.89	222.337	256.869	198.119	284.548	249.329	228.753	244.388	267.165	253.285	224.696	301.795	188.02	260.341	259.286	233.057	239.106	260.944	238.441	246.576	248.278	226.712	214.062	300.49	260.548	272.401	260.617	209.801
1047	186.064	3.71985	160.145	56.7138	50.8557	31.8179	43.6435	41.4575	49.0588	51.8838	30.9571	50.0154	45.1329	49.0956	40.1825	39.9399	42.7008	30.1645	38.0443	47.1384	54.7976	47.5416	38.7512	42.8311	39.1873	45.1989	32.6459	54.3274	41.8982	37.3977	44.8537	53.6621	44.0826	45.1201	32.5131
1048	347.1	3.71985	184.6	288.621	286.91	233.859	266.416	255.812	273.276	343.227	226.817	300.235	292.607	268.976	229.381	243.463	296.091	266.127	259.667	259.525	334.39	256.94	257.894	228.781	444.772	263.583	265.936	276.999	254.818	248.276	273.277	296.964	234.407	259.773	245.82
1049	456.228	3.71985	201.285	610.549	592.671	452.457	556.152	526.808	559.54	592.624	467.413	639.975	591.911	534.738	505.927	530.734	556.734	512.237	587.284	502.235	579.301	615.119	525.272	527.324	576.613	522.374	527.872	596.539	540.778	470.581	639.366	513.647	589.239	659.154	587.437
1050	579.455	3.71985	249.605	110.096	109.292	83.4176	107.318	87.9732	98.6007	92.2192	77.7167	96.6644	125.174	86.1029	85.6815	85.3081	83.4364	97.7566	88.2367	74.5392	110.476	100.197	68.212	112.101	106.397	99.3897	90.0902	114.979	89.3927	75.3951	103.714	88.2351	96.022	110.977	88.6024
1051	489.395	3.77343	225.658	66.2528	40.4974	43.0122	54.2731	40.7464	53.8152	63.6674	52.3141	58.794	61.5458	46.4199	29.5274	38.6822	56.0433	55.534	33.3648	50.3749	36.0473	66.2015	41.6587	56.0447	65.9369	57.5455	56.2315	53.8008	55.1559	39.8639	45.8249	56.115	68.316	78.8592	61.8879
1052	689.389	3.77343	248.685	294.01	247.949	211.266	266.56	190.609	214.082	252.319	229.472	275.502	294.592	232.155	218.579	248.484	276.133	234.866	259.2	227.541	236.983	290.534	220.644	220.497	267.399	223.044	252.645	252.615	215.203	218.206	279.161	236.251	265.818	286.252	275.134
1053	711.553	3.77343	272.299	325.7	246.78	255.913	286.873	249.96	263.244	272.405	203.665	313.786	294.852	237.894	243.038	267.272	269.196	241.187	274.694	225.698	270.273	312.904	229.861	243.235	286.981	268.055	251.237	279.394	264.665	198.658	282.399	255.852	267.441	303.882	285.984
1054	361.215	3.80725	190.576	725.533	643.708	582.807	681.164	616.02	635.068	667.7	604.254	681.784	679.866	644.393	611.872	638.993	663.157	623.913	646.493	589.947	646.77	648.221	587.756	613.271	646.373	617.205	633.392	713.26	647.249	611.035	651.876	608.667	644.023	700.654	666.813
1055	847.664	3.80725	304.204	243.191	193.102	121.917	212.441	146.988	159.338	174.056	122.161	193.858	224.818	132.342	155.678	179.297	208.92	146.086	207.373	137.963	170.408	237.749	176.666	147.951	206.369	197.139	188.772	208.725	141.576	115.866	205.573	182.166	178.115	230.667	186.008
1056	333.083	3.84105	180.131	247.03	253.539	245.456	266.267	249.182	244.854	265.097	234.948	264.482	261.954	259.721	250.482	237.54	262.57	236.344	255.008	240.413	269.67	273.621	237.219	241.655	269.476	226.122	257.26	271.467	231.767	229.941	260.982	271.947	245.363	252.595	275.082
1057	349.117	3.84105	186.132	292.942	282.873	268.788	268.285	293.183	261.344	266.67	214.45	255.318	209.767	242.113	252.522	244.549	283.075	232.197	257.587	290.038	231.945	229.952	286.971	264.214	213.945	274.783	269.54	261.615	217.884	201.905	264.336	316.301	222.911	269.061	271.962
1058	637.466	3.84105	254.456	518.404	400.948	329.468	382.992	312.644	351.194	405.485	363.626	445.216	446.864	324.543	351.28	372.841	429.915	367.323	442.718	364.237	414.231	444.527	359.025	351.503	375.882	368.299	363.064	444.479	347.974	344.583	441.994	390.949	416.345	444.972	424.968
1059	764.622	3.84105	286.012	869.296	857.835	621.505	823.218	670.295	691.737	744.186	608.91	813.801	822.714	663.331	662.004	735.891	786.779	694.908	805.332	613.818	809.946	780.222	630.185	668.764	780.301	779.056	674.67	786.008	648.011	647.411	816.095	667.776	801.515	928.541	846.099
1060	783.389	3.84105	256.115	154.685	124.594	101.575	134.114	107.214	139.028	138.579	115.683	145.399	138.532	131.517	125.241	112.596	140.765	112.481	142.771	98.3059	140.985	137.335	115.248	109.347	112.328	119.446	119.34	157.5	131.331	107.499	150.378	122.905	168.195	149.714	154.625
1061	823.455	3.84105	275.461	227.655	175.825	116.668	159.572	120.684	148.804	171.455	112.149	183.459	197.906	149.5	121.891	156.845	173.864	131.042	147.727	125.275	153.977	195.38	138.136	126.127	172.706	145.823	136.357	215.591	151.626	139.036	192.768	144.602	198.212	212.759	193.599
1062	299.179	3.87487	182.52	441.14	368.183	347.823	331.755	358.735	417.685	368.204	353.807	358.336	376.738	411.76	372.702	363.358	384.549	362.732	403.917	344.506	365.489	406.349	328.432	337.966	395.752	371.383	409.863	382.132	372.992	338.479	385.928	370.774	403.417	404.91	367.456
1063	319.153	3.87487	186.78	14748.7	13278.7	11682.8	13313.2	12131.1	12550.5	12960.1	11625.5	13339.4	13505.8	12271.2	12259.7	12608.4	13217.6	12151.7	13186.3	11947.2	12950.8	13669.5	11773.9	12265.6	12900.8	12460	12470.8	13149.1	12172.5	11591	13036.8	12353.1	13276.6	14154.7	13037.4
1064	605.338	3.87487	232.903	485.216	384.384	335.044	422.846	380.179	403.725	391.5	339.62	432.675	446.641	378.067	353.04	405.883	440.364	379.484	398.907	355.6	369.344	442.406	374.211	324.924	429.253	429.937	373.247	465.106	348.186	350.553	406.574	385.391	413.331	478.195	441.754
1065	721.436	3.87487	252.496	3203.63	2831.33	2532.17	2902.22	2495.38	2811.82	2802.86	2524.53	3086.76	3130.4	2882.02	2632.21	2823.6	2938.44	2715.49	2994.96	2421.82	2833.6	3044.1	2518.93	2452.05	3021.82	2809.46	2866.06	3204.56	2694.65	2505.77	2995.92	2748.26	3104.6	3230.17	3027.98
1066	248.232	3.92845	182.504	119.648	95.8095	78.6031	99.6523	78.2109	89.1635	97.4026	83.0223	113.316	92.3312	92.5456	94.8374	95.4699	102.49	95.6075	92.8346	93.5011	80.4226	79.2783	86.0609	95.0811	84.943	98.9478	104.339	104.725	87.0664	82.5377	94.4376	104.428	87.3915	125.776	116.694
1067	368.96	3.92845	220.422	275.998	207.99	139.164	236.457	188.149	223.946	222.214	156.535	233.469	237.873	195.311	159.083	241.123	222.8	175.912	195.513	195.609	209.899	259.05	173.176	215.751	206.726	226.855	201.415	245.225	205.31	185.347	218.2	213.015	247.691	291.156	254.255
1068	435.15	3.92845	197.045	89.1624	104.64	98.6227	127.573	105.482	117.093	102.017	103.895	94.494	74.0617	101.466	84.0955	101.751	94.6656	111.062	113.237	101.601	91.993	86.9019	106.75	100.458	106.62	91.3844	114.892	109.473	112.526	108.417	82.014	97.6	86.592	91.1463	103.076
1069	540.27	3.92845	210.701	877.175	796.222	709.404	792.593	693.357	790.794	770.53	687.208	816.131	821.31	743.057	715.02	771.413	816.655	725.756	798.841	716.296	800.287	809.999	731.264	715.676	791.976	761.937	786.963	832.58	704.385	728.27	829.667	786.837	802.097	846.131	790.635
1070	549.259	3.92845	219.29	379.509	326.711	294.283	366.911	294.167	317.867	352.711	284.441	359.852	338.954	339.709	311.964	313.555	391.833	316.897	359.984	306.514	321.455	365.521	300.04	309.181	340.697	330.647	335.055	385.008	327.121	310.343	346.651	304.756	346.576	371.315	353.482
1071	609.445	3.92845	250.671	330.689	332.763	250.176	333.687	266.533	284.991	294.486	283.034	340.213	340.767	287.332	297.699	295.376	297.575	265.068	352.527	301.655	300.004	364.151	249.364	258.111	307.178	291.047	306.87	304.026	307.404	284.752	351.225	258.882	318.358	311.075	345.581
1072	898.607	3.92845	292.787	5331.61	4354.15	3390.57	4431.45	3630.95	4032.25	4277.15	3432.84	4620.56	4701.62	3937.87	3854.83	4198.67	4490.28	4024.42	4347.95	3675.61	4373.37	5121.57	3638.13	3806.54	4411.1	4052.19	4033.03	4628.37	3866.74	3566.95	4483.17	4203.68	4755.36	5035.2	4697.68
1073	1029.65	3.92845	316.699	207.076	121.152	82.7956	156.654	91.4575	118.226	140.454	83.6102	139.001	142.809	108.772	83.0258	138.417	129.646	90.9068	109.974	81.1276	139.759	183.174	94.333	113.372	88.2582	124.12	115.904	185.106	104.403	113.931	170.905	120.675	140.956	187.659	158.405
1074	245.08	3.96227	166.121	2321.08	1754.24	1526.37	1821.19	1582.77	1686.83	1706.43	1564.68	1774.09	1917.29	1648.73	1673.88	1572.17	1866.52	1660.89	1824.43	1536.69	1789.53	1982.2	1571.57	1554.61	1861.45	1684.32	1624.32	1731.23	1562.67	1631	1875.76	1547.81	1785.3	1992.53	1808.7
1075	368.769	3.96227	220.426	112.74	86.7954	54.9997	105.332	65.9905	101.909	116.976	64.4176	84.051	62.263	50.9282	30.4413	82.8493	80.3167	46.8363	81.8526	91.1309	66.0357	102.637	52.1015	84.7413	94.6766	45.0346	74.8135	108.516	77.3785	71.0144	64.9957	86.1256	64.9195	101.871	92.0296
1076	510.238	3.96227	213.92	499.85	448.193	356.557	423.122	351.368	405.629	398.211	390.947	474.384	463.599	393.758	379.281	427.808	468.321	402.558	471.556	369.187	438.869	480.067	371.729	408.376	454.36	439.46	417.881	480.051	418.589	381.907	443.043	406.786	453.39	516.629	476.115
1077	743.492	3.96227	266.88	296.886	241.892	214.277	246.807	213.583	243.525	225.43	199.31	283.789	245.389	191.108	195.42	219.113	252.046	216.616	225.876	208.739	238.837	273.285	209.227	211.468	253.512	206.267	213.563	240.346	231.203	204.032	271.131	238.396	281.583	255.526	267.367
1078	315.124	3.99608	175.705	207.766	181.147	174.904	180.338	179.513	198.013	175.365	180.637	187.431	178.432	183.468	165.202	160.521	186.525	166.867	192.662	167.884	192.205	193.157	181.977	183.542	166.907	162.026	186.897	171.581	159.154	158.972	187.971	186.041	189.539	216.362	179.621
1079	441.095	3.99608	198.476	143.23	246.743	264.745	203.734	276.988	295.683	246.418	272.849	227.84	160.788	277.234	278.507	287.164	206.297	283.51	226.345	282.176	256.152	142.573	278.891	253.296	282.192	259.713	290.681	229.489	304.267	258.597	252.816	293.036	175.18	139.157	220.148
1080	225.072	4.0299	166.877	246.102	230.275	261.478	202.458	231.777	248.709	223.482	248.543	226.217	234.553	267.986	224.723	228.193	234.945	263.404	218.382	254.166	247.996	218.108	235.379	228.407	248.934	228.172	257.653	231.445	246.926	243.608	238.133	248.191	224.316	227.584	232.694
1081	457.206	4.0299	202.768	272.347	233.182	241.105	241.516	212.164	211.411	228.689	240.698	251.781	230.317	196.295	236.887	234.321	280.75	231.215	222.699	233.986	239.157	254.087	224.589	221.725	254.356	258.064	231.602	243.999	228.605	224.743	251.335	228.506	240.379	249.517	246.649
1082	469.23	4.0299	201.123	405.094	430.806	325.159	412.123	347.908	374.431	400.657	366.466	407.299	404.608	343.839	357.044	369.478	366.851	333.261	385.512	356.225	387.729	418.658	371.699	369.699	369.731	416.287	349.317	421.815	361.995	359.129	414.011	383.576	426.211	411.756	365.112
1083	599.382	4.0299	232.954	310.461	256.836	228.058	275.629	208.561	226.062	242.772	187.321	282.903	259.52	245.296	228.974	271.823	255.845	257.166	265.998	263.688	256.446	247.335	217.501	239.47	272.474	234.153	216.774	273.458	220.556	232.349	259.48	240.116	260.787	287.306	255.284
1084	601.381	4.0299	241.226	565.746	481.103	401.291	504.544	410.829	425.387	427.7	375.062	495.53	571.717	410.998	411.285	430.749	486.784	430.402	499.297	432.474	474.057	517.722	436.909	456.304	442.445	423.982	454.078	508.407	462.859	423.551	507.919	451.812	489.896	546.513	518.063
1085	695.358	4.0299	243.227	1072.97	1010.65	764.065	945.686	747.623	847.284	862.37	753.887	969.179	972.419	851.082	769.066	870.44	956.313	779.89	933.673	798.223	868.499	1052.79	823.217	859.929	882.826	867.343	880.491	978.742	852.215	730.917	1022.96	874.515	928.878	998.017	946.37
1086	791.459	4.0299	261.351	140.89	110.788	91.9994	114.459	102.292	110.112	118.433	91.1887	118.878	131.482	113.963	85.3757	111.93	121.474	96.3198	135.879	113.278	123.778	134.654	109.01	101.184	121.53	109.97	102.711	123.015	104.701	104.918	119.923	120.207	113.912	117.419	150.808
1087	326.379	4.08348	211.103	23867	22082.2	19873.8	22903.4	20589.6	21270.1	22499.1	20209.8	22784.6	23037.4	21193	20415.8	21541.1	22357.6	20377.7	21914.2	20979.5	21644.6	23486.1	21047.3	21145.5	22258.1	21648.8	21487.2	22717	21182.7	20394.5	21768.8	21466.2	23175.4	23353.3	22556.5
1088	379.226	4.08348	199.441	809.925	761.562	741.121	803.222	723.763	741.063	813.588	710.461	806.62	783.534	747.993	737.286	791.949	804.058	719.468	840.456	741.336	796.332	790.154	761.481	757.634	744.09	801.508	790.856	793.976	736.569	712.808	809.485	809.365	748.901	854.622	870.9
1089	499.308	4.08348	225.536	312.478	256.587	228.991	261.834	254.624	272.017	277.56	238.979	298.806	279.686	251.96	257.186	281.488	307.609	258.285	302.281	244.123	248.546	272.463	230.368	291.046	315.945	297.589	281.235	247.455	244.097	240.025	292.12	302.203	299.374	281.566	320.113
1090	607.399	4.08348	232.885	1658.21	1347.01	1249.68	1480.8	1234.05	1386.13	1476.81	1227.29	1613.66	1574.48	1346.8	1357.41	1349.51	1492.27	1373.81	1464.47	1259.18	1467.08	1568.19	1294.64	1315.34	1433.59	1366.16	1395.51	1579.63	1305.69	1151.49	1501.31	1406.38	1595.3	1662.34	1523.63
1091	801.404	4.08348	258.661	526.761	438.686	297.375	461.521	316.427	422.129	406.978	357.511	491.193	451.729	382.107	369.898	394.741	442.946	400.198	485.418	350.656	437.886	527.208	358.812	398.437	441.048	403.168	416.848	487.912	424.638	355.741	484.207	427.026	462.786	463.636	478.587
1092	611.423	4.1173	250.653	387.569	290.372	253.269	289.233	262.326	278.496	332.725	219.48	303.189	302.6	303.363	293.243	355.983	297.128	285.763	312.961	284.344	329.856	314.566	264.012	272.649	342.809	298.638	312.931	305.025	304.795	287.519	307.969	292.316	325.878	320.463	322.944
1093	667.381	4.1173	242.061	1045.68	966.462	769.61	937.589	808.69	867.04	893.559	761.467	987.412	957.054	863.631	894.899	881.288	904.297	853.771	907.411	780.246	923.626	939.281	773.878	835.066	902.318	857.678	890.513	993.39	860.885	765.668	994.946	954.238	1001.47	978.118	977.007
1094	997.691	4.1173	315.629	6014.34	5011.36	3740.16	5181.77	3907.21	4390.75	4813.98	3697.62	5508.55	5474.18	4396.42	4210.68	4687.1	5214.63	4324.46	5142.8	3937.11	4896.75	5742.46	3965.6	4202.3	4908.27	4540.99	4474.68	5410.68	4341.76	3825.64	5292.29	4465.68	5364.57	5863.24	5319.78
1095	304.3	4.15112	199.591	33035.1	30449.4	27653.1	30787.6	28401.1	29191.3	30083	27227.8	31449.7	31552.4	30270.1	28648.5	30474.2	30459.5	28995.2	30447.1	28499.3	33497.5	31739.7	26932.4	30757.7	32242.8	28824.3	29758.6	30736.4	27634.5	26819.7	30526.4	28756.1	30879.1	33264.5	30180.1
1096	337.114	4.15112	186.378	476.82	469.171	414.136	462.028	414.527	435.858	440.975	425.241	432.813	467.394	418.771	431.113	424.955	420.547	416.605	429.248	420.92	448.426	454.978	452.289	422.705	449.938	460.711	442.468	421.447	437.889	403.659	450.434	452.157	468.851	465.057	439.038
1097	343.098	4.15112	183.102	246.891	233.31	172.942	241.219	193.679	198.65	263.591	160.662	259.495	220.273	218.28	175.448	181.312	239.339	213.333	249.004	195.84	257.894	267.155	241.119	188.031	218.455	196.437	195.331	222.965	194.181	210.996	252.699	220.169	241.487	257.029	248.45
1098	343.206	4.15112	194.031	290.446	258.319	219.149	245.622	229.758	238.06	253.953	241.207	264.382	274.927	238.213	223.272	275.491	262.837	231.941	251.264	235.851	255.573	258.858	213.572	218.053	261.004	250.181	236.652	284.951	250.418	171.366	251.733	238.032	258.721	289.399	277.79
1099	447.2	4.15112	204.39	188.588	169.539	157.403	191.635	181.436	191.577	143.998	168.609	184.239	166.383	164.232	173.087	169.989	196.473	204.685	189.091	153.723	175.936	171.66	165.716	187.866	188.329	191.27	202.549	180.564	183.802	159.748	183.638	192.09	179.599	175.969	192.305
1100	579.413	4.15112	246.893	151.552	110.193	114.714	123.883	111.227	104.327	134.085	78.4515	124.238	143.941	112.229	103.67	113.687	127.892	119.151	116.399	108.145	130.008	146.578	97.3518	128.36	128.515	116.238	127.397	128.643	119.329	120.519	112.302	126.877	130.727	155.201	130.443
1101	692.593	4.15112	277.602	193.805	183.75	141.388	193.575	138.608	163.855	193.201	117.618	200.681	217.124	157.212	138.301	165.305	176.609	147.981	177.331	148.35	187.079	185.714	151.742	164.901	193.747	153.239	180.584	212.675	147.434	140.294	159.713	145.507	218.448	200.668	194.01
1102	942.633	4.15112	300.022	8591.98	6718.9	5040.82	6913.84	5447.81	6098.37	6458.24	5015.31	7078.53	7526.51	5971.58	5721.14	6453.28	6845.8	5918.61	6863.48	5444.31	6713.54	7650.61	5369.15	5905.44	6609.24	6342.55	6169.8	7342.81	5842.15	5018.21	6825.69	6415.53	7276.7	7868.19	7205.7
1103	244.263	4.18492	187.48	571.106	487.857	452.589	467.865	580.642	420.448	474.105	404.285	512.686	428.112	404.798	394.697	510.13	441.978	446.43	474.863	415.608	449.677	393.937	378.856	496.242	452.025	439.758	442.969	458.89	404.221	410.858	449.427	564.755	467.419	455.629	461.856
1104	403.246	4.18492	203.549	301.194	274.278	224.147	266.567	247.122	255.766	266.383	243.073	259.791	290.387	258.199	282.397	264.7	283.531	274.612	281.252	258.831	251.905	252.15	225.628	275.471	273.845	248.121	245.989	249.598	228.622	214.171	256.681	273.668	252.633	318.38	280.303
1105	495.318	4.18492	216.986	2151.07	1923.89	1676.68	1995.31	1709.17	1789.93	1927.8	1544.89	2092.24	1975.88	1762.23	1738.87	1882.81	2000.16	1762.14	1921.84	1730.89	1785.5	2106.27	1713.21	1789.81	1885.28	1886.95	1739.03	1983.91	1838.05	1713.27	1977.14	1763.89	2066.38	2188.64	2014.25
1106	511.316	4.18492	221.118	1383.12	1264.95	996.599	1179.93	1070.83	1113.08	1164.67	1004.83	1317.83	1258.86	1134.04	1086.46	1159.43	1166.23	1156.77	1145.32	1036.29	1175.28	1261.51	1087.14	1126.7	1174.1	1165.69	1134.03	1247.87	1104.85	1020.83	1207.4	1167.71	1214.77	1275.88	1239.07
1107	671.413	4.18492	243.395	727.589	674.434	521.784	671.108	599.718	660.214	648.429	526.045	721.237	668.805	598.109	593.306	626.674	672.995	599.236	666.604	569.675	642.017	722.107	554.512	617.222	639.022	641.509	642.161	720.036	591.531	604.163	718.285	683.002	669.865	662.097	651.364
1108	298.348	4.23852	204.342	49171.4	47918.9	43049.8	48579.1	45286	46743.4	48092	44294.2	49888.3	50326	46152.3	44162.7	48700	49082.1	45894.7	47829	44927.2	49747.1	49688.7	44629.8	46559.3	47293.4	46411.5	46165.3	49136.3	45655.7	43225.9	49025.8	46125.3	49092.2	51035.5	48909.9
1109	332.331	4.23852	206.462	22805.4	23121.4	21164.6	22740.9	21029.9	21486	22017.5	20632.2	22911.8	23239.7	22538.7	21792.7	21909.5	22551.1	21877.7	22770.9	20767.6	23595	23032.3	20558	22175.3	23448.4	21377.5	22282.5	22429.4	21332.3	20120.9	23023.2	21578.7	23046.4	23790.8	22121.9
1110	421.186	4.23852	195.724	305.48	287.126	222.122	315.882	239.754	252.766	284.034	222.847	298.936	280.458	277.168	248.971	267.057	308.187	285.272	259.93	226.356	248.989	308.314	256.994	263.598	243.659	218.66	262.938	280.597	260.683	261.219	306.796	255.079	265.314	307.014	325.223
1111	499.306	4.23852	219.821	130.748	132.879	91.2758	126.505	106.32	112.823	86.3708	111.352	108.959	103.407	113.386	125.298	115.779	127.828	110.647	105.757	97.134	119.619	119.351	100.49	130.696	123.992	117.162	114.874	107.525	114.31	116.507	110.866	144.684	142.44	149.244	100.279
1112	715.418	4.23852	257.862	1051.94	907.576	683.491	884.376	741.324	827.839	866.479	672.993	975.966	924.187	791.315	756.943	919.948	901.772	781.354	941.055	769.829	839.917	972.229	738.587	819.375	834.95	802.891	792.719	993.708	783.312	780.936	916.618	886.407	915.007	1024.28	894.733
1113	739.622	4.23852	288.71	217.383	179.257	146.15	168.178	106.425	163.463	160.793	132.82	185.557	164.922	150.941	139.346	165.37	146.857	140.401	171.008	140.717	168.611	196.409	146.976	155.979	159.937	155.375	142.697	177.653	155.157	131.285	172.147	154.996	166.415	188.235	159.468
1114	751.429	4.23852	257.629	194.843	141.715	139.577	145.215	143.839	111.741	126.053	115.463	165.257	159.909	116.838	108.764	126.659	139.133	117.801	160.86	125.039	132.882	147.611	133.138	109.641	136.378	136.692	136.023	157.957	116.711	134.012	129.028	136.096	155.04	159.385	172.492
1115	948.59	4.23852	298.76	5033.16	4325.58	3161.95	4286.04	3537.35	3835.15	4182.23	3083.23	4801.15	4779.68	3993.9	3870.39	4164.32	4515.15	4034.24	4271	4045.67	4306.59	5107.58	3491.28	3951.68	4150.25	4119.86	4077.71	4973.33	4033.21	3722.47	4605.56	4308.48	4945.57	4915.31	4894.96
1116	242.284	4.27232	181.109	13828.2	12027.5	10964.8	12920.4	11579.5	11516	12555.5	10820	13167.4	12412.7	11876.1	11602.1	12249.2	12712.9	11351.8	12125.8	11590.7	12282.8	13423.6	11349.5	11682.7	12620.6	12075.2	11503.4	12647.9	11400.7	11298.3	12339.8	12249.2	13410.9	13543.9	12393.9
1117	325.204	4.27232	189.775	1622.82	1450.03	1405.16	1485.84	1291.39	1379.62	1514.99	1332.76	1507.31	1479.71	1424.24	1393	1432.03	1582.21	1353.7	1558.37	1439.23	1436.27	1590.84	1355.24	1389.41	1569.94	1512.49	1492.49	1427.22	1508.66	1293.73	1457.12	1442.2	1507.98	1639.08	1508.27
1118	361.16	4.27232	189.024	580.088	480.568	448.286	502.043	436.166	461.854	510.348	417.275	517.889	523.174	442.623	465.313	478.881	511.462	496.633	503.391	439.725	514.381	510.917	454.842	490.355	497.367	456.216	478.944	459.94	448.215	463.43	516.054	462.281	509.509	521.299	493.291
1119	609.381	4.27232	238.407	996.16	658.833	552.627	738.735	520.151	578.225	709.615	590.199	801.712	855.534	608.041	610.003	675.344	700.819	583.732	749.206	582.736	601.398	835.568	593.338	595.252	644.806	631.274	627.342	753.779	640.763	574.39	678.415	657.849	786.581	869.885	750.401
1120	711.357	4.27232	245.835	488.164	432.104	331.605	412.21	346.597	375.847	383.9	316.392	432.393	494.985	445.814	395.786	408.866	415.964	355.491	433.673	366.072	432.024	478.16	347.056	372.471	439.136	398.125	403.981	465.665	377.369	331.433	467.194	389.176	495.115	486.492	421.353
1121	769.395	4.27232	256.195	750.951	673.978	566.445	632.789	535.152	609.958	604.69	503.525	628.796	711.168	543.608	566.917	561.497	604.297	568.394	622.128	550.321	626.354	711.911	559.784	557.912	610.084	556.724	553.772	666.026	570.521	506.841	670.151	590.91	663.915	708.525	690.433
1122	880.617	4.27232	290.376	2081.81	1639.03	1276.28	1791.61	1354.82	1591.96	1659.91	1325.33	1826.49	1913.26	1554.31	1451.97	1552.1	1668.66	1476.62	1734.61	1396.37	1694.92	1980.22	1423.07	1448.83	1681	1599.44	1481.29	1806.01	1453.74	1294.55	1787.4	1568.36	1843.49	1952.18	1790.37
1123	74.9307	4.30613	165.309	61.9106	392.081	582.98	280.728	580.217	528.339	413.857	586.827	230.91	114.45	530.964	558.378	533.401	347.383	555.202	372.687	551.382	459.049	73.1739	597.236	582.42	450.805	515.925	510.319	218.65	547.494	544.797	295.615	515.071	180.378	52.7894	248.626
1124	429.166	4.30613	197.128	412.269	336.477	267.788	381.173	337.068	312.179	332.146	296.784	370.068	377.947	300.086	307.015	288.314	341.639	317.148	319.862	293.093	321.286	354.342	276.224	292.735	304.316	280.833	314.349	353.165	318.849	285.432	354.222	296.635	340.414	352.886	335.882
1125	447.231	4.30613	202.898	794.441	749.438	624.07	730.854	650.388	684.407	658.884	673.141	728.821	748.995	677.303	677.731	716.57	727.415	671.372	734.072	650.31	754.827	729.04	640.293	681.604	692.513	718.848	695.499	724.446	681.622	637.202	700.267	641.972	740.032	757.983	745.67
1126	595.462	4.30613	248.096	134.412	114.521	81.3294	105.419	105.15	111.003	126.761	119.37	110.189	117.972	80.7245	83.2515	105.274	113.493	101.401	100.588	98.7885	113.318	112.254	98.2062	95.9491	120.779	114.865	128.008	121.672	117.154	91.3328	120.846	113.103	123.212	126.446	131.451
1127	803.441	4.30613	258.65	131.677	106.468	103.404	120.243	101.535	112.925	119.227	99.3413	124.326	119.214	92.2143	106.835	109.93	142.023	101.707	138.739	93.4063	104.253	139.548	96.7492	120.166	137.915	101.557	124.464	133.012	117.219	116.455	127.425	96.341	148.75	135.186	143.879
1128	861.609	4.30613	299.193	96.0103	103.92	57.4861	113.747	89.8637	98.5653	123.72	63.5622	92.7943	106.573	103.335	92.765	105.837	112.821	79.0778	92.7482	88.6474	120.334	132.756	83.0292	87.5447	100.907	110.563	78.6649	112.042	98.5828	89.5101	110.733	102.686	116.444	106.862	123.724
1129	921.67	4.30613	314.776	568.416	518.113	349.571	579.352	447.946	441.354	524.543	363.769	506.624	549.703	462.196	405.578	449.947	539.821	451.684	541.466	408.361	485.837	620.156	385.324	458.956	532.932	477.145	473.574	536.202	415.038	365.939	512.444	472.827	508.908	595.512	605.438
1130	273.071	4.33995	173.537	326.053	200.716	185.93	248.737	194.399	195.025	206.522	174.427	243.891	276.973	215.607	185.838	203.568	219.302	169.835	233.97	193.855	217.06	246.974	187.204	201.383	217.521	216.673	211.399	236.487	196.206	172.435	241.22	177.236	249.861	285.161	226.789
1131	457.204	4.33995	201.272	445.563	440.634	365.02	404.144	401.346	396.008	389.589	349.824	441.257	445.167	405.009	437.302	389.377	444.353	379.619	401.975	401.121	424.963	437.584	376.225	389.325	378.079	390.702	386.367	450.052	373.26	362.272	398.022	385.689	407.809	425.16	430.39
1132	607.307	4.33995	234.276	2407.3	2286.14	1805.16	2298.49	1948.13	2115.85	2227.64	1859.38	2422.74	2415.76	2035.56	2072.18	2033.46	2245.56	2147.18	2245.53	1887	2183.72	2402.1	1973.41	1988.01	2100.97	2060.31	2104.71	2347.59	2039.87	1834.3	2356.44	2081.98	2471.84	2478.32	2406.41
1133	735.393	4.33995	255.074	1114.88	983.937	795.607	1024.76	821.688	873.536	963.528	739.32	959.933	1057.5	892.417	838.013	971.484	1056	871.123	1003.81	849.447	931.851	1124.27	879.985	851.419	980.554	933.713	944.75	1091.1	862.1	826.187	1076.42	950.056	993.658	1137.27	1063.39
1134	752.421	4.33995	258.946	258.38	240.449	183.75	244.803	186.177	227.489	234.715	173.396	257.916	262.669	209.822	213.114	224.8	244.714	220.367	244.032	219.592	239.85	238.881	205.738	212.929	232.158	212.538	220.001	247.312	202.538	196.321	265.224	209.741	274.689	240.352	237.284
1135	885.573	4.33995	287.841	7844.17	6860.95	5549.79	7094.32	5766.67	6234.07	6825.64	5396.72	7612.65	7794.99	6354.61	6099.82	6537.92	7068.09	6077.37	6848.58	5810.27	7064.83	7851.35	5878.34	6256.61	6794.85	6468.98	6552.4	7837.17	6271.31	5696.52	7653.45	6650.5	7999.05	8402.91	7735.12
1136	270.316	4.39353	195.995	31019.7	29060.3	26372.6	29401.4	27652.2	28167.8	29443.6	26770.1	30218.3	30587.2	27745.2	26899.6	29507.4	29382.7	27513.3	29072.8	27355.8	30098.6	30725.5	27134	28002.1	28878.7	28594.4	27963.8	29967.7	28137.9	26415	29481.8	28332.8	29909	31401	29468.6
1137	290.269	4.39353	195.362	19912.2	18889.7	17725.5	19220.4	18578.8	18897	19354	17925.7	19399.6	19639.3	18721.5	18556.1	19022.3	19100.9	18471.3	18499.4	19126.3	18959.9	20039.2	18783.1	19393.2	19996.4	19495.8	19137.2	19352.3	19003.3	18415.3	18933.4	19455.3	19694.8	19916.3	19622.1
1138	337.114	4.39353	184.804	649.157	675.744	597.859	620.055	551.944	561.046	572.164	564.568	580.294	622.215	535.05	582.733	604.735	630.51	587.564	581.778	550.846	572.916	627.606	581.016	565.486	548.809	599.039	552.256	592.812	571.59	601.797	626.32	608.834	571.307	550.609	571.583
1139	605.305	4.39353	228.711	3505.44	3133.6	2671.28	3133.93	2690.73	2983.74	3100.87	2688.81	3268.4	3287.41	2868.47	2802.91	3011.12	3171.04	2994.76	3138.89	2752.9	2983.62	3313.42	2864.97	2895.26	3157.79	2981.1	2889.8	3278.34	2890.76	2685.38	3282.58	2902.54	3338.06	3378.9	3235.47
1140	631.37	4.39353	240.971	222.694	199.214	168.817	206.989	193.64	167.901	204.113	190.544	221.071	232.223	186.635	168.336	199.561	203.986	198.152	187.687	163.495	215.377	236.505	189.457	189.823	205.617	213.003	201.721	233.235	176.133	178.079	183.177	181.963	218.393	219.429	223.983
1141	727.374	4.39353	244.378	1012.5	1048.97	778.727	1027.94	888.385	916.558	874.456	817.614	1068.59	1083.05	1016.81	915.627	891.667	1068.37	858.518	1009.46	823.239	1025.7	1021.42	844.186	876.365	929.426	843.284	952.022	1070.94	912.263	923.851	1051.96	846.936	1071.25	966.239	959.212
1142	815.685	4.39353	303.164	798.48	813.366	553.612	800.326	610.747	681.166	733.268	553.335	775.836	821.272	646.797	619.433	667.167	768.445	692.177	751.213	627.957	741.096	853.532	568.059	642.271	691.883	721.697	698.541	735.43	618.747	575.732	768.835	655.649	801.142	838.672	793.346
1143	212.237	4.42735	180.793	3696.88	3484.1	3143.79	3474.56	3162.72	3283.39	3414.54	3014.77	3606.4	3648.71	3250.32	3240.6	3520.89	3383.18	3307.33	3476.47	3124.35	3747.29	3593.48	3109.22	3395.14	3462.28	3289.99	3418.91	3495.94	3267.42	3102.82	3489.84	3293.16	3572.29	3720.41	3443.85
1144	271.94	4.42735	170.274	137.054	920.746	2810.61	651.933	2924.89	2067.49	918.176	2630.98	535.22	313.134	2390.99	2907.27	1522.96	756.697	2502.55	855.904	2878.89	966.356	216.698	2841.12	2928.53	1016.57	1866.42	1731.71	589.288	2872.71	2466.08	737.37	2225.77	488.985	154.142	665.165
1145	359.113	4.42735	202.853	309.849	270.08	202.748	253.282	236.661	259.284	247.247	228.477	325.034	292.042	285.16	232.915	281.093	285.513	237.297	267.755	205.219	267.686	344.993	257.246	279.756	298.907	258.524	250.984	297.288	234.737	225.924	298.409	238.817	324.394	329.429	307.119
1146	549.413	4.42735	241.733	176.534	133.531	116.554	163.831	131.33	155.862	170.825	102.719	156.198	176.096	144.987	150.03	142.589	158.996	141.563	166.686	123.975	152.492	159.823	105.514	139.011	120.046	149.286	132.206	176.56	139.453	117.671	162.32	179.065	152.149	158.703	161.122
1147	611.413	4.42735	249.304	119.21	131.723	98.9815	112.383	107.838	107.033	125.72	96.2201	122.664	136.974	127.853	118.475	110.102	120.467	95.1164	140.998	114.723	127.107	134.689	124.225	102.307	101.534	104.283	137.831	112.24	93.9135	101.729	118.951	111.509	126.116	134.606	114.041
1148	623.443	4.42735	254.576	136.213	91.6018	97.3108	114.35	96.4177	93.9766	92.1602	100.242	138.961	115.285	90.9613	113.546	106.335	110.826	118.702	113.528	95.3345	112.893	142.271	88.8708	82.3831	97.4344	110.534	117.603	136.283	94.5896	101.144	123.139	100.129	126.531	98.0081	121.439
1149	717.525	4.42735	264.439	325.573	285.42	192.992	292.455	229.805	230.197	289.916	193.59	280.796	282.833	238.762	229.476	266.107	263.111	222.485	287.453	214.221	239.586	275.048	199.677	263.966	275.062	264.024	279.533	298.829	238.571	212.987	271.618	252.238	294.406	293.205	295.487
1150	1041.72	4.42735	323.833	3095.23	2378.46	1880.6	2615.04	1851.47	2130.4	2393.97	1860.42	2569.64	2775.27	2076.42	2057.99	2332.83	2531.31	2101.24	2428.21	1932.97	2317.02	2736.12	1884.59	2027.95	2309.2	2198.72	2199.65	2627.43	2052.45	1717.13	2597.18	2247.85	2659.12	2900.68	2560.66
1151	305.101	4.46117	179.167	2298.38	2065.83	1708.35	2355.25	1958.42	1992.36	1933.91	1991.42	2135.83	2212.9	2169.03	1980.21	1909.81	2147.36	1967.31	2009.78	1908.29	2032.88	2281.41	2030.26	1858.22	2017.34	1967.65	1891.62	2037.8	1908.19	2181.93	2301.14	1908.68	2277.26	2304.38	2109.97
1152	333.081	4.46117	176.928	147.298	149.509	95.7821	124.124	115.955	149.373	131.24	105.538	138.797	114.582	103.892	122.536	122.329	137.291	119.474	113.299	106.342	109.917	137.337	106.894	115.349	128.703	132.708	111.763	135.811	122.744	119.57	121.363	128.084	127.825	129.283	132.352
1153	695.341	4.46117	241.865	524.625	456.551	379.251	496.313	400.919	433.722	505.17	403.257	520.705	517.064	453.663	431.176	426.332	495.075	427.54	485.511	434.513	465.606	479.24	464.111	448.473	476.549	481.892	461.027	532.598	463.665	454.075	495.123	437.759	528.326	564.361	499.731
1154	903.723	4.46117	320.89	641.957	597.994	432.046	606.467	445.109	494.336	594.289	400.584	628.134	666.264	492.039	494.155	545.657	572.787	509.3	580.174	487.212	574.541	663.848	466.908	448.851	546.927	531.735	517.016	664.34	472.368	411.281	584.516	513.042	679.049	692.765	622.809
1155	915.577	4.46117	292.705	2105.45	1651.86	1219.22	1712.14	1298.17	1451.2	1590.77	1025.61	1779.71	1793.91	1459.62	1395.54	1563.94	1805.5	1390.48	1684.1	1471.64	1727.56	1865.34	1313	1593.71	1635.1	1606.58	1520.55	1991.67	1453.9	1282.32	1865.5	1784.08	1916.17	1944.91	1900.09
1156	207.04	4.49498	164.263	95.4549	86.2978	86.4047	81.9813	94.6658	82.8269	80.4239	94.0714	75.3528	80.3689	86.8137	106.037	84.9593	96.7422	89.8139	83.1007	93.5759	85.2536	87.8661	94.4974	92.0109	81.7537	97.5345	85.8209	83.6077	93.3005	81.9072	88.9077	90.8293	78.5366	94.8963	81.9696
1157	579.348	4.49498	230.34	852.951	805.634	681.112	870.702	682.925	765.102	774.918	683.795	803.161	846.928	736.845	738.537	710.713	829.716	703.964	789.443	714.615	795.334	815.152	731.423	782.164	808.383	757.784	719.08	839.84	704.541	683.595	836.991	743.517	851.792	876.686	842.033
1158	829.434	4.49498	270.273	135.05	111.122	64.6729	119.944	86.3256	106.083	93.7039	91.531	116.098	114.673	100.069	88.1281	108.61	118.271	103.762	122.428	87.0109	82.4801	127.043	95.048	102.307	106.007	102.453	86.1886	117.383	103.862	90.0332	114.426	99.5897	107.245	122.385	104.728
1159	991.614	4.49498	305.945	8877.7	7131.1	5594.73	7242.52	5844.08	6375.76	6946.55	5549.36	7739.05	7787.53	6548.6	6126.44	6769.2	7360.9	6351.41	7206	6168.1	7126.98	7940.66	5864.88	6231.49	6793.11	6678.28	6640.65	7623.79	6403.43	5745.17	7625.34	6682.19	7767.1	8051.03	7733.2
1160	112.921	4.54857	164.965	1.13463	308.287	565.754	165.68	536.548	488.337	324.398	542.408	91.2023	23.1277	467.979	511.89	451.816	233.683	465.42	278.183	491.806	365.442	2.2915	538.635	495.188	354.257	435.929	439.416	99.0068	462.359	495.224	183.848	444.405	53.6451	1.47496	131.893
1161	368.77	4.54857	220.426	449.014	554.18	421.997	453.595	386.088	346.814	471.62	371.14	523.529	496.15	369.128	351.053	468.843	436.955	406.681	478.282	388.401	517.656	439.201	394.289	467.496	503.895	399.754	515.867	431.583	416.889	338.912	481.451	586.79	557.774	483.926	420.89
1162	447.22	4.54857	201.402	779.426	743.492	642.488	728.865	660.203	699.145	739.293	661.718	749.645	766.993	689.297	676.061	685	732.006	699.217	738.142	679.494	727.723	763.391	623.262	676.586	719.749	681.92	747.494	749.382	667.547	661.576	758.446	724.729	756.053	755.692	718.533
1163	457.211	4.54857	199.772	447.351	393.516	345.498	398.931	342.698	378.354	356.81	322.59	431.118	387.999	364.517	372.246	356.65	420.625	337.297	332.875	370.214	392.25	399.226	353.243	383.263	401.498	373.501	383.019	411.288	356.047	355.727	438.705	396.649	430.5	416.707	389.972
1164	491.323	4.54857	214.134	143.132	130.919	105.711	135.289	131.19	119.833	132.647	105.451	132.013	146.446	124.626	113.455	132.799	132.644	141.992	131.871	118.108	97.3851	155.302	114.084	133.958	113.71	122.632	123.649	117.105	133.031	113.605	130.235	128.016	115.816	121.121	145.425
1165	537.397	4.54857	243.238	160210	161681	145321	167326	149053	152578	159504	146486	163517	160027	153504	151011	151318	166057	150937	163580	146113	155171	160837	146933	146865	152712	152860	152512	162015	148712	142438	164201	150494	160623	161679	161812
1166	623.473	4.54857	253.236	210.17	213.173	204.875	197.44	205.51	209.08	206.287	174.006	273.162	269.283	206.726	211.842	216.835	251.036	240.062	249.415	210.402	213.027	255.099	229.961	239.82	214.964	220.095	237.331	273.425	246.584	226.632	271.058	240.264	297.705	248.643	284.052
1167	721.373	4.54857	244.415	365.341	311.729	254.443	341.46	257.856	300.988	318.25	284.908	307.545	350.981	296.657	316.288	285.619	358.577	294.891	345.014	244.65	315.167	319.294	263.935	288.433	311.589	341.559	322.919	365.568	293.165	292.073	343.181	276.079	315.445	328.574	358.714
1168	775.487	4.54857	274.455	445.692	391.205	282.621	400.052	322.588	353.081	388.811	296.941	400.696	415.054	309.562	307.621	350.519	417.496	356.737	388.1	303.432	388.884	466.973	329.289	355.619	379.718	383.429	393.371	432.174	363.442	317.391	408.512	406.853	453.195	442.236	421.057
1169	203.049	4.58238	162.734	14.9402	16.9373	18.2163	11.305	16.6693	18.1723	18.3236	18.5702	22.7913	19.2209	26.7184	28.5345	21.2355	27.1369	20.2077	25.053	25.9288	18.7397	27.022	22.1495	21.3797	23.8715	15.8149	17.1975	17.603	18.7385	17.8857	22.7862	19.5649	24.3943	17.4248	21.123
1170	262.237	4.58238	186.817	13456.4	11688.1	10907.6	11988.2	11353.7	11558.1	11992.1	10973.7	12103.5	12424.1	11621.6	11519.6	11957.2	11959.1	11356.5	11781.3	11228.2	12218.4	12493.6	11341.3	11412.2	11887.4	11654.6	11565.4	11972.8	11429.7	10918.7	11874.9	11652.1	11945.8	12472.4	11957.6
1171	322.266	4.58238	196.05	108.017	102.185	96.8016	88.8314	84.7767	74.0604	102.42	68.526	104.15	103.028	70.8337	84.9868	101.163	102.73	89.1495	96.8059	81.3158	89.3608	84.191	79.5761	80.9525	76.1715	94.5732	84.2969	107.088	89.7478	70.8044	88.7183	92.7175	98.9757	87.3766	103.204
1172	343.097	4.58238	183.102	421.181	331.836	320.433	323.457	307.245	325.839	313.502	345.407	345.37	343.907	354.556	346.776	320.289	304.294	350.489	321.959	317.48	354.325	340.761	341.592	343.889	377.779	292.732	340.715	330.078	379.809	310.76	340.322	333.638	336.518	302.87	373.127
1173	439.383	4.58238	222.056	61.5158	52.7685	53.9838	66.6333	46.8737	64.4435	51.2718	50.0961	65.9627	73.4874	50.0534	54.0407	75.0957	65.8427	52.5308	58.5395	54.207	50.9582	72.984	54.9711	59.7508	62.3751	66.4053	55.0046	71.5189	49.808	39.6117	51.527	62.4439	67.1517	68.5129	67.4514
1174	799.411	4.58238	261.307	117.15	71.0275	77.7239	116.482	67.4992	86.9528	86.3352	81.8238	94.9484	101.911	77.1841	88.8222	91.0786	123.166	68.6895	106.973	72.4168	100.359	120.997	88.1937	84.3381	117.762	69.9485	103.151	104.601	78.045	77.5983	110.834	91.6444	100.179	133.685	112.235
1175	986.659	4.58238	308.406	2731.98	2110.85	1624.96	2257.42	1704.9	1972.15	2152.33	1543.7	2314.07	2398.3	1832.24	1852.92	2050.88	2252.28	1856.5	2127.47	1751.18	2110.92	2379.55	1684.99	1853.5	2135.56	1954.48	1984.35	2286.51	1880.51	1566.2	2218.64	1936.63	2373.51	2579.78	2251.54
1176	277.17	4.61618	176.684	1944.55	1804.91	1570.01	1800.01	1631.45	1609.64	1797.11	1537.43	1780.18	1845.92	1684.47	1567.79	1697.22	1755.76	1577.18	1685.57	1577.78	1743.44	1906.04	1613.64	1571.32	1713.01	1649.59	1674.1	1780.9	1663.95	1517.18	1739.97	1663.97	1803.12	1906.29	1714.14
1177	429.235	4.61618	204.642	3291.96	3253.67	2841.94	3288.08	2875.28	3117.36	3281.81	2931.82	3048.24	3154.38	2995.7	3035.84	3036.88	3177.91	3003.4	3162.62	2893.41	3086.31	3197.9	2846.25	3041.97	3046.3	2987.61	3001.72	2948.38	2881.15	2713.42	2959.91	2959.94	3165.62	3185.86	2992.45
1178	493.35	4.61618	203.826	235.931	123.721	103.254	138.262	136.354	129.84	168.042	151.55	178.159	154.671	120.413	126.7	143.354	128.22	130.612	121.087	167.048	166.741	116.261	108.414	109.924	121.984	124.016	90.937	191.635	151.32	130.007	152.754	166.337	145.687	165.04	166.595
1179	557.364	4.61618	236.128	433.054	390.43	319.647	389.402	324.007	372.356	402.479	330.678	382.42	439.073	364.982	349.894	348.147	401.003	332.589	410.684	333.107	413.683	416.103	332.696	357.29	375.744	338.381	375.054	429.438	362.53	314.98	386.059	380.64	418.43	481.911	433.334
1180	587.31	4.61618	230.268	490.573	451.679	418.246	484.583	413.55	440.797	491.12	375.756	480.581	520.973	436.341	442.424	464.445	486.4	472.053	480.073	430.826	469.45	490.514	384.127	441.29	466.838	441.478	417.692	508.977	402.67	364.593	466.828	436.319	493.989	525.386	498.502
1181	200.972	4.65	167.981	22.4933	1365.39	2420.69	713.976	2507.49	1780.67	1531.47	2565.65	471.07	111.827	1804.97	2076.93	1661.85	1166.42	1725.97	1317.53	2546.44	1533.3	41.7791	2499.33	2047.77	1592.7	1784.33	1691.51	618.382	1983.55	2501.96	1091.21	1757.19	352.167	28.3036	824.445
1182	295.046	4.65	171.296	55.133	51.9102	50.4548	52.235	50.0176	51.114	54.0979	37.2449	47.9243	57.0795	50.3405	47.0996	43.589	56.5204	58.1154	50.3016	49.2886	42.4011	44.9397	53.2575	54.5278	51.8423	56.9007	50.2272	40.4511	53.3654	40.9222	57.6386	52.6402	48.5393	38.8851	57.6795
1183	312.359	4.65	208.48	36701.1	33175	30088.3	32095	31294	32529.5	33578	32212.2	33943	34613.2	32531	31593.9	33111	34099.7	33540.2	35761.2	29989.3	33763.6	33619.6	30813.1	31410.8	31095.2	30874.6	32201.9	33848.6	31213.8	31143.6	32552.2	31095	33533.5	33420.2	33346.7
1184	347.102	4.65	184.6	194.659	204.626	170.219	209.661	174.447	186.106	221.97	176.099	208.649	193.791	202.779	180.689	187.279	187.294	193.387	207.519	191.898	268.327	203.094	179.373	193.685	284.367	190.548	177.012	205.829	194.619	153.993	206.658	192.609	226.795	172.267	194.653
1185	429.122	4.65	216.427	478.036	355.132	264.357	377.223	263.171	299.579	354.304	276.539	396.7	403.269	311.428	315.493	305.005	405.919	320.401	364.471	279.467	314.707	426.269	287.822	273.846	292.838	314.09	293.106	374.448	311.744	263.614	391.304	280.492	386.159	455.729	359.07
1186	492.816	4.65	185.655	1137.81	1610.48	1604.45	1653.33	1662.53	1630.78	1647.1	1659.77	1309.56	1182.33	1592.42	1550.28	1493.86	1470.7	1521.08	1626.56	1482.54	1557.14	1100.84	1607.3	1595.72	1552.37	1512.41	1503.62	1280.46	1462.61	1373.21	1370.3	1430.87	1271.96	1132.47	1233.21
1187	711.356	4.65	247.187	182.392	183.18	138.72	153.581	135.571	155.646	177.881	133.261	190.645	192.332	130.785	140.467	179.811	194.954	151.561	159.996	141.097	186.472	186.464	135.393	154.554	160.739	162.579	157.001	192.104	136.355	153.424	206.857	172.213	177.815	185.295	204.257
1188	833.593	4.65	299.351	376.159	330.099	235.311	365.118	263.092	305.9	338.908	233.693	375.054	370.073	311.98	253.481	287.769	346.045	275.994	353.466	250.457	388.523	405.928	255.347	275.064	380.009	339.689	312.103	367.421	276.296	231.176	381.522	313.305	424.667	409.502	373.45
1189	871.548	4.65	284.127	2971.27	2429.23	1764.92	2506.48	1935.58	2169.75	2433.75	1769.75	2764.44	2790.94	2032.74	2095.98	2357.57	2622.35	2193.41	2442.61	2102.42	2410.15	2904.7	1902.77	2184.97	2469.21	2461.02	2309.33	3008.85	2172.45	1960.89	2834.03	2513.83	2750.36	2946.59	2952.4
1190	929.599	4.65	295.13	12475.9	10123	7962.76	10269.9	8418.59	9024.89	9868.83	7900.14	10797.2	10849.5	9320.26	8889.77	9792.25	10227	9207.91	10169.3	8645.86	10224.3	11427	8306.84	9056.67	9699.88	9163.08	9080.58	10930.2	9038.24	8064.12	10521	9362.56	11150.3	11076.3	10513.6
1191	1051.63	4.65	314.202	806.085	538.242	320.915	523.877	470.752	508.043	543.78	340.253	649.344	718.073	502.05	432.634	497.601	627.555	491.148	549.887	394.776	599.712	704.085	375.449	533.239	523.149	516.099	532.354	710.356	519.623	395.833	664.795	592.12	746.374	846.542	660.107
1192	325.321	4.70358	194.433	2066.37	1956.38	1713.4	1906.8	1706.32	1784.1	1866.43	1630.07	2035.17	1997.15	1821.72	1717.76	1850.64	1877.66	1747.02	1883.91	1666.4	1894.83	1989.09	1678.25	1674.43	1879.04	1808.21	1700.32	1828.58	1761.86	1646.76	1851.93	1796.21	1860.68	1960.22	1857.54
1193	326.209	4.70358	186.617	374.142	416.499	351.643	341.27	339.985	340.551	391.109	334.858	347.696	381.571	286.48	338.087	361.915	352.553	362.83	391.689	319.739	353.341	369.737	311.052	330.735	352.088	337.727	326.527	393.241	353.044	295.856	382.973	352.031	368.798	379.508	330.352
1194	337.112	4.70358	181.639	1137.76	1026.13	978.585	1070.83	959.815	906.065	991.507	907.828	1044.09	1028.52	905.473	931.038	965.032	1066.55	965.309	1065.83	965.049	986.254	1007.61	945.7	974.479	1008.35	981.332	1022.58	965.013	986.853	946.665	1122	964.194	1016.56	1116.98	1075.96
1195	368.522	4.70358	220.431	786.738	720.944	619.9	778.498	626.506	679.86	704.202	592.215	779.348	757.438	660.096	639.578	696.292	721.813	659.95	741.322	620.993	688.677	751.88	626.004	655.15	696.023	683.38	654.327	748.74	647.639	576.525	740.549	690.702	753.752	811.812	742.302
1196	403.112	4.70358	192.94	219.013	190.716	162.891	178.889	150.03	154.007	174.618	179.649	197.464	192.173	172.367	161.413	181.579	197.096	182.43	187.044	158.096	199.067	188.774	158.512	138.918	164.517	144.809	173.063	199.905	151.685	152.654	190.238	159.053	194.777	210.997	169.15
1197	457.279	4.70358	220.357	3116.01	2876.05	2534.15	2983.51	2612.24	2869.52	2862.09	2578.86	2796.35	2825.57	2777.74	2718.88	2691.11	2905.73	2676.51	2829.25	2566.7	2768.9	2927.22	2649.77	2638.9	2916.24	2771.21	2740.28	2680.65	2555.67	2444.75	2747.95	2719.6	2907.28	2904.69	2673.45
1198	519.396	4.70358	226.722	162.172	206.988	143.141	176.673	169.931	161.942	159.575	139.972	184.637	187.169	165.368	163.307	177.943	187.643	162.423	183.26	166.203	153.184	219.859	133.006	151.21	190.451	174.165	156.628	211.053	155.52	158.034	191.358	171.364	176.388	199.754	188.467
1199	524.852	4.70358	206.453	489.668	672.177	645.737	606.12	591.851	610.693	596.228	611.06	509.331	477.19	597.511	613.26	531.834	568.509	565.584	561.221	568.103	633.95	420.561	598.702	562.535	564.025	538.409	602.096	499.745	550.529	532.407	525.198	535.167	451.689	457.647	512.062
1200	623.308	4.70358	231.361	1004.66	790.36	701.246	909.363	702.371	783.116	793.741	644.568	867.894	956.347	770.841	764.212	767.287	846.187	752.645	885.702	748.449	880.015	902.507	772.845	786.365	865.275	769.04	745.485	936.96	767.596	736.34	872.224	797.815	899.338	946.099	885.888
1201	924.642	4.70358	297.634	8361.8	6486.6	4935.08	6347.46	5370.34	5813.34	6238.73	4675.86	7060.92	7098.33	6041.45	5890.06	6390.15	6627.88	5964.02	6461.38	5815.28	6503.34	7210.1	5185.98	5901.06	6283.22	5976.77	5961.46	7095.33	6086.81	5234.78	6796.33	6291.67	7067.94	7434.67	6991.99
1202	101.949	4.7374	168.568	100.146	566.383	791.091	423.679	796.183	755.812	613.425	780.48	346.137	200.126	739.491	761.205	733.342	500.905	738.4	557.89	762.865	649.314	144.575	788.684	786.693	621.343	700.03	694.325	354.904	728.315	712.98	491.495	723.783	289.741	111.87	414.008
1203	172.942	4.7374	162.694	1.6188	480.025	732.376	243.255	741.963	672.847	489.167	740.085	165.481	33.198	671.002	718.504	628.08	368.423	660.382	454.458	671.853	516.623	10.0742	701.883	694.76	524.843	632.682	645.888	196.38	680.203	674.623	326.128	637.023	124.831	4.80736	244.318
1204	259.054	4.7374	173.973	698.541	593.729	504.651	611.823	519.685	539.862	575.788	492.003	561.969	538.656	483.701	508.396	519.291	589.981	485.33	558.734	478.499	566.2	643.802	496.028	508.865	520.237	551.427	498.315	531.186	523.105	474.868	584.214	509.056	569.292	667.493	528.688
1205	368.881	4.7374	220.424	739.109	814.908	641.318	725.942	620.079	660.231	704.186	528.783	845.087	806.359	627.227	631.441	743.192	727.099	619.313	709.915	658.3	745.323	728.778	675.369	725.669	685.446	671.433	784.294	712.602	725.491	560.646	745.883	865.522	811.708	828.322	691.643
1206	583.382	4.7374	242.762	427.376	331.95	307.625	350.041	311.639	333.073	360.055	282.204	367.974	412.415	329.181	307.356	336.865	380.216	313.276	365.059	302.392	349.725	348.731	303.129	341.045	366.807	330.869	362.684	362.982	328.625	263.304	319.391	352.424	374.522	364.178	365.077
1207	791.481	4.7374	270.484	70.4412	54.9124	52.0327	71.8062	48.2867	44.5339	62.2903	26.8987	99.9498	68.324	54.1614	45.8143	62.1632	60.5828	43.9098	56.0181	44.0545	69.0002	87.8305	52.3338	56.0756	58.9645	49.2761	70.7769	71.635	62.919	33.6047	51.0315	66.5922	79.2576	58.2313	85.0203
1208	847.644	4.7374	301.742	477.312	306.278	191.23	326.04	193.118	245.538	270.471	208.916	317.23	361.7	212.644	256.711	274.881	310.46	218.152	307.699	208.185	335.52	377.719	215.838	243.783	356.782	268.559	250.416	344.768	295.963	198.808	328.948	273.181	368.887	412.879	364.747
1209	1035.64	4.7374	314.265	6742.8	5463.48	4255.81	5560.44	4376.49	4815.11	5152.63	4133.98	5736.05	6012.29	4877.02	4757.61	5071.19	5707.91	4835.95	5376.28	4589.28	5281.32	6054.24	4364.17	4720.9	5245.05	4841.15	4801.45	5537.58	4701.41	4079.71	5745.95	4966.72	5859.82	6119.18	5622.11
1210	214.953	4.77122	167.311	22.2789	1330.08	2130.78	776.681	2199.16	1868.14	1378.11	2126.13	591.561	163.769	1845.72	2046.03	1740.06	1065.24	1806.4	1228.47	2144.4	1389.84	67.7587	2209.22	2139	1471.74	1790.67	1763.26	627.196	1993.01	2005.48	932.092	1804.67	432.509	15.862	784.077
1211	348.321	4.77122	207.592	932.372	922.872	790.142	944.357	849.153	867.005	901.911	835.95	919.678	906.076	842.953	822.64	862.914	942.695	833.16	888.333	798.943	873.316	949.727	836.093	827.306	874.669	864.73	838.885	892.579	845.873	799.249	877.991	871.41	930.85	930.792	893.982
1212	357.07	4.77122	182.832	205.075	209.046	259.427	232.248	226.323	222.214	269.16	199.935	206.248	192.451	218.275	241.275	231.388	248.07	243.495	225.258	229.399	218.11	225.748	233.706	238.445	249.947	267.399	246.218	220.317	246.09	218.188	245.633	209.768	192.409	202.394	226.573
1213	368.427	4.77122	220.433	167971	147288	133719	147380	135935	141992	146159	133923	150127	151213	140562	135904	146467	147705	139921	146363	136339	149793	152791	134698	138062	142433	140392	140504	148808	136462	131987	146840	144088	148140	153714	146816
1214	368.618	4.77122	220.429	1839.52	1715.59	1406.83	1763.15	1489.79	1580.83	1645.95	1393.42	1765.03	1718.16	1508.22	1501.05	1654.48	1727.37	1559.98	1613.18	1466.55	1737.35	1763.29	1486.9	1581.73	1624.43	1569.83	1573.38	1747.96	1514.83	1417.64	1692.91	1713.11	1767.95	1860.27	1678.99
1215	368.961	4.77122	220.422	973.827	925.457	818.377	916.836	785.057	847.256	886.499	723.179	918.369	888.709	841.448	824.302	841.009	917.259	845.442	952.27	800.211	842.552	906.555	811.499	801.443	893.113	825.925	843.01	843.114	759.52	734.842	865.06	915.339	922.036	941.833	900.63
1216	511.312	4.77122	215.358	197.466	182.22	143.1	160.096	157.75	158.47	179.383	147.765	173.345	152.436	150.383	169.642	186.988	162.442	181.273	161.469	162.587	175.289	163.609	171.505	192.335	163.136	158.879	168.745	209.421	138.898	130.856	197.009	180.835	183.227	161.392	174.935
1217	605.485	4.77122	253.398	971.694	899.892	734.067	848.985	714.291	779.133	835.11	717.437	855.693	884.187	782.112	700.587	798.059	938.987	770.403	846.553	722.685	850.671	950.734	702.515	748.82	774.391	864.999	751.139	939.352	782.183	743.835	890.928	830.746	811.248	989.93	853.349
1218	719.433	4.77122	257.835	203.779	201.616	187.35	197.323	167.043	192.436	166.934	189.98	211.202	195.851	181.859	175.519	201.882	203.147	186.261	225.157	179.907	177.456	180.351	162.963	200.418	201.924	183.055	172.598	195.334	171.469	178.857	168.973	222.331	248.869	254.704	210.968
1219	1057.71	4.77122	324.959	1434.87	1046.92	773.338	1174.32	846.244	973.965	1086.66	796.865	1212.74	1187.92	928.706	946.932	1011.88	1184.87	939.543	1095.36	884.221	1073.14	1234.3	825.058	988.631	1044.31	990.807	1008.74	1182.1	878.027	829.223	1231.35	942.663	1154.07	1325.22	1070.08
1220	1085.75	4.77122	330.771	3673.12	2784.18	1999.27	2813.18	2121.65	2436.37	2646.37	2010.85	3019.02	3203.87	2391.77	2324.95	2609.48	2944.22	2348.5	2829.72	2160.74	2713.07	3220.1	2032.37	2329.7	2645.23	2489.82	2454.75	2940.15	2335.94	2062.04	2935.55	2437.65	3000.98	3208.52	2871.16
1221	319.055	4.80503	180.438	295.809	271.09	267.013	282.393	274.595	274.187	294.31	256.306	261.847	257.348	261.123	275.231	244.61	279.741	255.468	296.425	256.862	281.041	270.887	245.736	245.005	260.525	261.619	275.097	243.197	254.309	239.652	265.736	253.322	265.482	255.733	256.985
1222	359.109	4.80503	202.853	536.945	438.975	353.908	410.61	412.385	355.621	447.923	376.249	443.703	436.535	381.232	424.215	404.137	416.589	412.41	398.5	341.142	433.57	454.534	350.669	342.866	422.913	400.785	416.796	395.501	377.897	382.79	424.097	397.237	419.461	435.419	413.917
1223	442.124	4.80503	217.684	1029.23	773.474	528.269	860.043	574.845	729.148	748.661	535.034	848.992	910.671	642.096	606.218	615.651	758.426	594.39	764.688	544.863	712.651	906.538	548.174	593.037	729.201	604.479	635.32	716.609	563.111	526.165	782.12	624.956	846.891	922.683	718.195
1224	503.215	4.80503	209.619	641.515	577.074	515.342	631.167	559.838	556.41	654.756	545.544	687.322	694.172	644.353	676.939	686.731	723.71	687.169	652.023	743.315	683.065	639.154	577.994	709.644	634.608	728.232	731.22	746.146	789.566	764.016	826.475	757.076	633.648	629.575	769.991
1225	567.381	4.80503	236.028	174.495	127.603	99.3687	128.743	123.258	143.584	118.863	116.742	140.043	134.224	114.988	112.102	143.662	128.41	120.438	119.752	119.219	111.129	129.283	116.343	128.91	138.52	113.42	144.956	136.901	96.529	119.344	117.439	114.599	134.716	167.142	130.621
1226	753.38	4.80503	252.296	584.221	454.034	410.248	505.525	434.814	460.733	467.375	417.807	507.318	527.695	459.609	390.378	487.672	523.372	451.836	488.724	398.684	442.312	551.756	398.053	421.234	504.101	488.985	438.675	512.259	448.814	450.331	552.296	482.876	543.034	566.993	536.068
1227	871.672	4.80503	302.84	122.158	120.88	98.5457	106.154	97.2524	110.085	123.645	70.4835	123.954	119.258	108.29	82.4817	97.3481	130.193	82.6418	99.4293	85.9964	104.266	146.603	80.9048	111.948	117.419	114.314	132.881	116.731	105.711	89.8057	126.223	99.0844	133.117	134.612	114.897
1228	216.949	4.85862	168.915	125.704	5135.35	8080.26	2755.37	8237.12	6776.11	5352.9	7925.87	2000.82	636.344	6986.37	7695.93	6537.49	3928.12	7108.2	4560.96	7999.49	5449.98	324.566	8131.33	7867.68	5703.58	6603.36	6590	2239.82	7444	7683.23	3603.16	6826.69	1482.3	154.317	2853.58
1229	240.987	4.85862	171.292	168.751	4771.42	10471.8	2558.38	9877.45	6532.54	4935.41	10450.5	1805.54	548.111	6639.7	8445.92	6239.04	3853.47	6778.15	4485	9721.24	5272.2	296.617	10276	7932.19	5362.88	6469.52	6403.53	2119.61	7363.44	9933.89	3564.89	6422.65	1381.29	182.921	2837.15
1230	292.865	4.85862	172.99	35.2409	456.548	633.233	323.417	603.026	566.524	434.059	604.125	268.671	130.875	545.318	590.968	507.608	398.859	574.332	435.241	593.207	442.092	83.1507	584.857	583.839	455.934	563.542	536	292.89	571.116	578.521	390.195	514.808	211.78	58.8045	343.557
1231	340.394	4.85862	213.728	30836.8	26610	23801.9	26129.6	23733.5	25099.7	25706.6	23535.1	26853.3	27005.5	25060.8	24251.7	25898.1	26417.2	25138.8	26160.8	23612.7	26785.1	27322	23225.7	24197.6	25020.7	24802.6	25315.4	26328.5	23926.6	22873.7	26334.2	25724.5	26327.4	27580.2	26011.4
1232	435.282	4.85862	207.526	1069.41	991.678	875.096	929.438	864.217	927.281	976.591	789.335	944.65	943.514	904.898	901.601	889.568	932.932	858.189	970.037	843.156	932.068	969.007	818.294	827.814	929.178	907.046	892.242	909.515	858.117	762.456	916.397	940.525	937.329	921.718	832.595
1233	517.318	4.85862	215.293	267.125	258.085	214.185	240.453	229.641	229.439	249.086	212.047	242.05	245.835	248.684	215.612	233.864	239.029	227.201	251.074	226.683	272.99	258.006	185.564	216.386	235.17	218.256	244.395	208.674	224.025	211.493	267.763	230.264	262.738	244.976	237.118
1234	212.073	4.89243	164.031	105.04	114.705	100.533	99.7195	101.574	101.806	99.6212	113.786	82.123	92.4498	100.814	101.725	83.1985	97.8034	98.5624	102.134	104.865	103.362	99.9053	94.9946	100.748	104.615	111.959	103.254	73.5437	100.945	94.1454	110.545	91.03	79.4984	100.611	94.0448
1235	225.073	4.89243	163.477	225.728	208.682	201.935	225.645	233.139	232.27	244.061	219.152	199.169	177.638	225.526	255	199.972	225.714	226.959	218.959	220.75	224.06	219.779	227.567	222.372	208.948	218.789	226.746	211.956	196.626	217.974	216.84	222.786	204.034	217.951	210.59
1236	292.739	4.89243	189.036	87.8234	62.4975	52.3961	43.3124	51.11	66.4671	67.7062	56.9866	56.1598	64.4725	77.6723	74.0769	59.3444	79.9735	64.4159	82.3949	46.1443	54.3402	64.0491	33.2611	54.8708	36.9034	51.2741	50.2561	72.8546	50.7034	53.8414	91.0641	48.4168	51.0881	78.5858	87.863
1237	374.938	4.89243	185.656	86.5789	3065.73	6208.72	1554.13	5968.6	4715.39	3367.5	6022.13	923.939	334.77	4986.55	5580.6	4283.11	2249.08	4902.07	2751.91	5887.98	3290.55	138.009	6325.26	5699.36	3700.38	4690.27	4416.9	1110.3	5357.44	5824.96	1874.46	4788.26	742.85	93.0646	1447.94
1238	579.346	4.89243	221.868	724.285	634.836	563.171	674.405	575.798	585.006	646.22	560.871	673.776	697.562	612.529	582.339	581.373	689.889	622.261	629.243	523.253	665.108	598.854	538.931	588.936	578.598	593.722	600.342	659.453	566.143	526.92	620.516	585.83	679.785	711.353	639.498
1239	735.389	4.89243	249.726	2503.96	2307.39	1825.31	2218.45	2018.16	2116.45	2168.65	1855.95	2699.52	2764.02	2265.45	2154.19	2392.32	2596.24	2461.45	2411.16	2379.31	2339.08	2487.91	1774.97	2397.39	2221.86	2454.66	2578.74	2914.14	2684.91	2393.79	2951.84	2649.1	2365.58	2819.66	3009.95
1240	871.696	4.89243	305.297	268.671	254.673	215.919	268.613	178.282	226.023	240.383	166.324	293.635	301.677	233.788	227.349	221.835	275.192	232.318	253.69	231.18	211.083	317.045	209.304	199.491	256.178	249.48	271.097	278.527	208.851	168.155	274.292	240.353	288.542	327.496	260.842
1241	182.187	4.92625	165.593	538.309	455.91	374.321	471.636	424.209	424.67	438.36	358.598	495.273	505.381	389.084	393.206	452.011	451.93	409.676	459.539	401.158	455.217	507.112	381.301	412.966	470.745	442.751	424.279	471.887	404.094	375.977	434.193	424.174	476.658	539.545	443.753
1242	214.253	4.92625	182.333	9888.03	7904.85	7067.9	7985.6	7381.73	7802.5	7904.16	7207.95	8151.56	8245.13	7814.01	7495.86	8173.1	7793.53	7595.94	7839.3	7234.02	8517.6	8298.17	7073.21	7624.55	7979.2	7622.03	7726.98	8069.1	7202.86	6993.87	7820.68	7555.52	7943.25	8650.45	7811.62
1243	256.297	4.92625	193.363	3176.16	3031.17	2697.06	3154.62	2909.4	2876.85	3068.8	2627.18	3065	3029.22	2756.86	2675.35	2974.86	2955.28	2710.27	2829.69	2841.39	3036.05	3068.91	2769.44	2806.25	3007.76	2853.2	2900.08	2875.4	2788.88	2554.85	2835.9	2897.64	3049.03	3186.85	2894.54
1244	292.352	4.92625	189.047	122.466	82.4776	76.6324	78.9269	69.5678	86.9637	77.6967	78.9627	103.104	109.094	81.8749	79.5405	91.6401	101.742	89.1959	98.1996	63.4412	97.56	96.0827	77.8472	76.2271	72.2393	80.6026	75.5269	98.979	77.2523	67.1649	100.924	65.9412	90.4607	111.894	96.2049
1245	451.136	4.92625	198.344	80.3857	107.481	88.3129	117.483	85.0904	89.2973	95.0238	95.6125	97.0658	92.8573	89.6903	112.794	95.9482	85.0688	77.9762	90.4334	86.5361	96.8796	94.391	85.5886	71.8944	95.0485	77.328	97.9045	87.9991	79.6961	67.4146	71.5877	88.3859	107.453	54.9256	87.239
1246	481.262	4.92625	200.982	13659.2	13371.3	11064.8	12524.6	11180.1	12098.3	12606.7	11496	11707.4	11820.6	11365.7	11128.6	11170.1	12178	10604.6	12282	10735.8	11627.1	12288.3	11380.2	11147.9	11893.8	11540.1	10447.8	10672.3	9985.61	10176.3	10474	10531.5	11148.8	12749.4	10567.2
1247	525.222	4.92625	212.307	11949.4	10019.9	7890.86	9545.19	9018.91	8901.46	9444.49	9116.51	9677.54	9671.96	8657	8423.69	9970.55	10012.1	9553.67	9555.31	8812.58	10168.3	9839.18	8213.09	9395.12	8755.32	9606.51	8886.82	8176.04	7826.17	9441.29	8737.79	8960.8	8172.47	9643.36	8748.51
1248	605.477	4.92625	253.398	269.328	213.268	171.072	248.369	218.226	235.348	239.141	178.373	267.863	232.513	222.489	231.139	191.784	268.024	277.314	240.863	211.316	214.644	242.493	196.705	188.774	250.609	209.832	265.345	246.479	227.436	194.912	268.238	226.116	284.565	257.321	267.201
1249	294.314	4.96005	199.876	43.4522	33.7173	28.4132	17.966	61.7775	41.295	28.3485	22.1336	123.392	105.386	63.6534	66.3701	94.7238	92.2593	135.6	51.5507	135.357	59.1886	102.551	29.8502	127.165	72.7643	106.965	140.881	259.41	243.633	176.385	259.707	194.638	264.035	111.995	263.971
1250	327.337	4.96005	200.525	4872.59	4091.88	3572.89	4132.8	3689.96	3775.74	4032.49	3644.53	4159.95	4298.33	3875.8	3639.73	3971.28	3933.59	3767.15	4047.75	3740.27	4077.35	4267.37	3614.66	3753.94	3899.57	3867.51	3865.01	4227.95	3757.94	3491.46	3965.56	3825.79	4188.71	4285.87	3970.36
1251	374.178	4.96005	193.424	1211.13	1051.81	934.018	1081.94	904.563	1012.05	1099.72	885.43	1036.13	1117.93	950.54	947.912	961.609	1017.55	915.801	1048.03	899.771	981.473	1133.33	909.434	907.838	1005.52	923.658	960.415	934.842	879.666	785.47	1006.76	906.486	1081.98	1132.78	954.259
1252	390.277	4.96005	208.248	1186.43	1121.53	951.973	1015.72	1015.57	960.029	1055.73	854.058	1487.81	1414.07	1239.54	1173.9	1272.12	1228.22	1371.69	1160.28	1141.83	1022.01	1340.1	840.767	1073.89	1096.17	984.067	1148.19	1463.94	1363.86	1166.27	1354.63	1113.67	1462.57	1021.99	1376.82
1253	406.747	4.96005	177.274	7.42795	27.1104	49.165	11.8468	76.7427	41.7222	24.9706	35.9282	92.132	46.5754	111.565	140.04	133.548	80.2336	170.582	57.7275	167.416	83.6081	21.8085	57.1285	123.791	91.2058	114.446	193.062	105.419	258.976	211.839	129.647	138.048	64.6268	8.82332	92.9364
1254	407.755	4.96005	178.847	10.8039	115.168	199.429	60.6009	242.475	189.749	103.352	104.894	167.304	91.429	335.756	338.704	359.331	188.461	536.81	177.01	551.387	271.094	55.0448	191.325	414.652	267.473	375.976	494.209	352.29	823.621	690.123	568.524	527.41	284.061	42.2055	376.038
1255	408.256	4.96005	178.84	1.42528	11.8516	52.0744	1.31317	74.563	37.0418	10.8837	20.3123	60.7111	28.0188	66.6777	79.1855	88.9191	50.8418	172.781	32.6891	173.386	81.0632	17.9859	35.4184	141.172	70.0607	102.159	167.324	147.701	300.879	223.554	200.929	193.7	88.733	9.67029	125.641
1256	425.722	4.96005	175.429	0	16.5129	20.2584	0	44.1134	18.6799	15.6939	23.6972	24.1597	13.1677	67.4425	63.3694	64.4225	15.0836	78.3122	12.2156	135.338	37.6241	0	36.6716	107.589	42.9369	80.808	97.655	27.4588	146.824	154.187	61.6325	95.2873	16.3631	0	31.9918
1257	426.731	4.96005	177.007	14.6864	88.4356	156.428	53.976	204.571	156.517	91.5289	105.234	98.5776	35.9488	222.549	243.953	282.124	122.955	373.738	113.555	550.238	157.225	22.3375	205.61	378.853	234.795	304.829	465.555	162.17	709.868	550.098	294.356	470.607	105.108	3.42934	210.551
1258	601.383	4.96005	242.596	595.115	551.575	484.386	523.706	480.576	511.129	492.633	446.561	615.534	611.816	558.691	508.585	572.475	560.807	520.941	568.81	443.6	540.118	625.345	465.97	531.538	529.04	561.615	555.403	582.291	502.779	431.83	585.757	606.402	610.355	617.817	635.597
1259	633.521	4.96005	259.816	986.36	862.733	719.447	755.674	825.629	873.339	760.387	608.887	2017.7	1962.21	1133.99	1110.81	1394.08	1316.29	1518.66	1088.89	1321.49	1129.46	1644.64	841.563	1230.91	1197.78	1208.06	1506.96	2442.39	2106.97	1571.47	2481.82	1463.9	2070.67	1369.62	2110.01
1260	635.539	4.96005	262.445	1718.06	1539.01	1173.95	1111.71	1514.78	1406.01	1221.99	923.881	4024.66	3697	2166.13	2144.39	2733.79	2661.43	3336.56	1799.71	3514.99	2477.91	3901.51	1427.08	2771.58	2708.46	2870.56	4032.12	7461.22	6239.65	4396.79	7689.41	4455.08	7072	3804.98	7112.46
1261	663.56	4.96005	267.463	336.847	247.112	222.218	238.195	223.178	284.313	252.691	185.49	333.01	313.309	258.924	281.859	317.394	290.592	277.665	275.194	231.541	267.41	354.389	193.706	237.62	264.714	236.003	263.505	346.915	281.662	242.798	359.809	295.533	363.306	266.948	351.605
1262	774.544	4.96005	279.591	17629.9	14058.9	10447.8	7403.62	14712.5	13452	10100.7	6691.77	47948.4	49024.4	25199.6	23260.9	32163.2	29923.5	37443.4	20164.8	30130.7	23113.4	38651.5	11710.8	25796.3	24197.7	25640.8	35520.3	56303.7	47243.8	36567.3	57230.3	34012.7	53104.6	30983.4	54732.1
1263	774.824	4.96005	278.31	4.50975	5.14017	0	0	8.96011	0	0	0	182.593	195.278	43.7196	30.1994	80.4606	69.1436	96.2881	17.3888	68.9738	42.4793	104.979	0	51.0278	43.0027	43.4071	104.075	242.086	179.5	98.3361	253.559	72.8692	204.667	72.8117	208.755
1264	776.559	4.96005	282.128	23142.3	20594.8	16201.2	10751.2	22507.4	20296.4	14837.4	10334.1	68599.9	61571.4	36802	34467.9	48122.5	44929	59080.9	27701.6	58486.6	38801.1	64619.1	19774.1	48237	44397.2	47768.1	67079.7	116073	98443.5	72731.3	118033	74981.3	112607	65850.4	114625
1265	776.683	4.96005	283.398	96.3944	113.239	96.6796	81.866	99.6603	98.6133	70.126	67.8227	242.235	193.231	141.755	120.491	148.22	189.253	198.899	112.175	181.471	155.524	249.414	123.38	185.179	163.6	170.438	181.055	262.184	258.806	169.265	277.235	232.284	277.523	224.922	280.459
1266	776.841	4.96005	283.397	0	0	0	0	6.75542	4.12955	0	0	232.302	190.186	48.0038	37.5387	109.447	97.5042	163.873	19.1317	190.13	92.2177	227.873	19.3726	144.291	129.765	143.389	270.835	719.618	538.067	297.748	763.177	332.548	707.932	283.506	665.109
1267	777.212	4.96005	285.93	0	0	0	0	0	0	0	0	44.7036	30.8185	0	4.13756	23.3992	19.8286	45.0747	0	60.3676	24.5949	58.751	0	42.5817	35.1694	47.2585	103.766	298.658	226.903	108.161	350.998	137.203	302.389	103.316	290.47
1268	795.527	4.96005	227.498	0	4.117	6.0463	0.266805	11.6795	6.68097	2.69003	0	72.7205	45.7469	42.6787	54.7338	100.107	27.1817	122.07	15.1874	203.116	41.5448	15.0092	8.30516	116.977	52.4014	110.629	217.175	254.092	517.994	338.942	358.125	288.747	170.183	25.0267	253.552
1269	796.026	4.96005	226.098	10.2464	5.5007	8.37585	2.75728	22.466	11.8639	2.22375	1.07849	83.5554	41.108	56.0922	67.2782	122.658	18.2296	166.12	28.075	220.52	62.1268	18.8153	22.9725	145.717	61.7019	115.105	258.32	266.565	556.253	406.638	352.543	346.821	204.492	16.3162	292.938
1270	796.527	4.96005	283.275	6690.38	4951.12	3218.64	2702.68	4481.35	4359	3814.36	2217.05	17075.2	18531.3	7625.24	6180.84	10031.3	10347.5	10868.1	7133.81	8527.81	7590.9	13426	3469.69	7717.91	7097.79	8217.78	10797.2	19535.9	13912.6	10407.8	19402.4	10120.8	16813.6	12675.1	17936.4
1271	798.543	4.96005	287.06	12747.4	9963.2	7142.33	6245.34	9875.98	9081.1	7335.44	5303.39	31832.9	30413.3	15675.7	14519.6	20764.2	20983.8	25058.6	13458.1	24033.2	17629.7	32998.2	8761.66	20826.7	19466.1	21004.7	28394.8	56363.5	41785.9	30583	55610.7	32312.1	54713.3	34765.6	55475.3
1272	798.827	4.96005	288.319	0	0	0	0	0	0	0	0	36.309	34.2761	0	0.728181	4.02191	6.44144	15.8031	0	22.8917	9.46393	47.4474	0	9.29518	19.4229	14.628	31.7283	155.286	87.7899	39.4055	148.427	46.3129	170.271	73.5169	143.266
1273	804.587	4.96005	290.799	5192.3	4553.56	3669.48	3465.43	4308.1	4322.44	4141.91	2853.55	7892.72	7249.02	5789.9	5512.01	6173.35	5929.73	7206.79	5054.44	5451.27	4225.74	6051.1	2721.45	4898.65	4718.82	4759.87	5709.33	9517.15	7732.47	5889.7	8919.6	7035.25	8543.13	5728.97	10319.3
1274	806.599	4.96005	293.292	5554.79	5914.07	4981.55	4015.78	6455.12	5986.63	5073.6	3715.98	12412.9	10415	8751.74	7980.69	9942.49	9213.8	12619.5	6894.75	11765.5	7497.52	10491.9	4417.42	10127.4	8635.82	9231.21	11857	20515.1	17252.2	12722	18221.6	15757.7	17807.1	9871.36	21804.1
1275	814.513	4.96005	284.437	1348.24	1758.47	1326.6	1169.06	1869.12	1884.38	1411	1082.22	5660.38	5594.24	2889.33	2100.09	3776.99	3428.22	4826.23	2373.74	5505.93	3334.41	3829.9	1427.33	4614.58	3062.58	4694.73	6309.74	11743	9208.71	6784.02	11413.7	7428.91	7506.55	9300.06	11301.9
1276	818.512	4.96005	280.604	2002.87	1439.63	931.672	793.286	1310.09	1321.6	1078.84	731.724	5245.92	6187.43	2364.96	1610.26	2757.49	3101.64	3218.35	2307.31	2396.51	2368.17	4348.89	904.277	2403.65	2085.3	2628.72	3242.12	6202.72	4058.56	2983.8	5883.43	3447.5	4570.77	5007.54	5882.09
1277	820.524	4.96005	284.402	4147.02	3442.59	2318.87	2026.91	2872.79	2993.93	2663.4	1794.57	9603.7	9723.1	4571.93	3257.24	6037.53	6480.83	6812.52	4691.36	6174.38	5155.84	9593.72	2231.6	5834.51	5248.61	6307.27	7773.78	13608.3	8540.68	6586.4	13299.6	8611.93	12534.9	11786.5	13967.7
1278	826.58	4.96005	293.173	2081.31	1707.39	1220.64	1317.89	1407.12	1421.82	1489.77	982.225	3062.06	2787.13	1993.55	1740.25	2153.03	2306.3	2446.1	1839.22	1954.86	1503.45	2464.69	858.752	1721.99	1627.42	1693.23	2110.29	4232.61	3038.75	2291.38	3863.66	2680.98	3569.93	2292.16	4397.63
1279	828.587	4.96005	295.655	4061.04	3386.51	2469.7	2951.36	2751.1	3015.41	3024.9	2213.75	4836.7	4861.42	3324.64	3237.68	3740.81	4205.09	4021.64	3709.56	3585.39	3426.9	4556.58	2378.95	3530.81	3819.97	3591.64	3770.28	5737.44	4325.6	3441.21	5150.15	4538.28	5440.31	4696.65	6217.58
1280	834.598	4.96005	288.11	601.319	606.138	394.506	521.533	450.921	538.21	537.52	391.376	1077.4	1097.63	676.228	466.609	790.798	768.335	759.307	766.57	747.899	778.002	887.565	436.317	755.33	768.862	753.35	879.109	1560.35	1083.68	716.454	1370.73	1027.68	1155.06	1479.11	1331.56
1281	840.55	4.96005	286.817	2177.71	1923.59	1365.1	1457.81	1806.63	1733.77	1650.66	1216.33	5727.83	6053.56	2775.07	2277.51	3458	3282.18	4335.81	2523.83	4997.15	3022.15	6181.42	1798.36	4163.02	4097.67	4239.44	5790.78	9531.99	7423.91	5819.95	9274.94	6828.79	9240.67	7986.91	10669
1282	846.531	4.96005	290.556	246.918	232.416	170.32	170.251	215.586	233.778	204.438	177.02	412.994	431.756	283.303	251.391	357.964	309.042	352.501	274.937	347.931	275.093	396.904	164.141	421.659	380.827	436.534	400.879	701.78	309.35	333.531	466.518	622.362	330.78	265.659	762.975
1283	859.454	4.96005	276.553	153.305	96.7075	83.4772	108.933	87.2254	95.9786	99.8188	82.1186	114.458	111.642	94.7439	81.8949	97.1038	122.869	110.034	113.23	103.756	112.815	108.768	86.2922	101.601	107.168	122.671	79.2096	103.941	88.8089	85.8793	132.024	86.7217	117.607	150.575	107.408
1284	862.53	4.96005	291.722	2596.53	2565.33	1922.03	2007.25	2201.79	2335.04	2265.09	1622.27	4551.42	4696.66	2972.05	2810.02	3753.2	3542.91	3760.1	3238.03	4036.19	3172.58	4948.73	2188.51	4178.39	4187.67	4614.78	4747.88	7256.85	4480.91	3946.61	5866.21	6080.55	5880.68	5580.95	7583.27
1285	877.663	4.96005	306.49	1139.72	1006.13	790.723	1089.93	815.026	928.341	1014.58	766.6	1075.52	1086.89	928.277	884.646	971.874	1054.63	882.837	955.704	830.211	1006.97	1177.73	785.777	932.367	1032.58	922.888	918.697	1076.13	904.713	758.815	1039.64	936.242	1105.87	1189.68	1016.38
1286	878.496	4.96005	291.639	2021.83	1645.91	1147.15	1279.05	1349.55	1422.3	1365.63	1018.05	2859.76	2960.68	1894.54	1762.19	2300.1	2343.75	2326	2041.16	2254.88	1976.22	3186.69	1204.87	2359.79	2415.94	2489.09	2611.78	4158.44	2589.22	2317.54	3386.83	3307.14	3583.63	3157.9	4240.83
1287	905.511	4.96005	295.245	410.366	432.909	312.715	274.326	343.953	377.745	317.014	235.964	654.086	689.689	475.73	397.3	532.27	559.934	561.05	484.957	527.314	509.779	803.441	291.124	513.571	516.26	571.124	617.327	840.433	615.274	544.968	830.134	665.813	906.117	753.392	862.185
1288	963.463	4.96005	301.161	233.489	202.277	125.543	122.9	217.362	198.134	188.065	91.3169	542.367	493.992	289.933	194.152	350.295	421.785	363.107	268.199	305.106	357.874	453.823	123.969	368.066	307.885	309.568	367.571	585.775	383.108	341.593	503.04	417.727	458.113	530.79	502.781
1289	968.669	4.96005	306.045	7117.49	5265.93	3977.76	5440.42	4254.25	4726.82	5034.73	3900.6	5914.91	5857.92	4809.17	4556.31	4988.05	5519.57	4608.77	5152.23	4244.46	5297.64	6001.36	4198.04	4534.35	5038.75	4756.91	4876.89	5686.27	4795.46	4028.77	5589.57	4830.8	5853.95	6202.96	5583.62
1290	973.626	4.96005	303.574	11558.9	9184.38	7244.75	9650.81	7555.01	8396.42	9040.47	7484.42	9611.8	9757.03	8208.87	8065.27	8681.06	9432.08	7934.22	9172.22	7577.71	9117.86	9965.19	7623.72	7961.78	8713.75	8320.28	8345.56	9105.89	7891.77	7086.08	9265.52	8181.15	9516.47	10007.3	8860.98
1291	1129.78	4.96005	339.984	3038.06	2124.32	1596.85	2353.79	1715.12	1943.12	2063.03	1554.28	2399.69	2443.49	1917.03	1835.27	2019.44	2351.05	1851.04	2138.69	1664.3	2169.64	2418	1659.62	1679.01	2023.58	1919.86	1962.05	2219.24	1770.25	1445.13	2292.18	1801.94	2184.4	2453.25	2171.22
1292	228.268	5.01365	186.546	4577.71	3870.95	3439.79	3751.2	3668.29	3553.59	3829.97	3255.53	3978.1	3957.94	3465.12	3456.78	4014.67	3628.52	3521.93	3701.26	3533.89	4020.43	3774.82	3509.62	3663.95	3673.48	3461.66	3722.54	3753.37	3542.97	3206.01	3700.04	3635.18	3868.32	4074.21	3692.97
1293	251.087	5.01365	167.597	638.732	601.694	510.461	601.154	559.953	525.303	598.928	513.016	583.116	582.101	534.183	532.541	614.29	542.893	555.057	562.601	554.654	603.593	614.319	537.99	550.696	578.514	583.745	582.131	587.121	559.381	493.331	621.982	565.844	588.407	641.213	514.595
1294	266.284	5.01365	194.573	137.245	151.209	157.938	74.9122	175.389	142.019	111.288	80.1126	443.961	341.741	263.294	254.75	311.68	251.195	396.808	190.048	402.627	238.733	316.897	134.417	328.394	253.654	286.368	414.009	564.39	628.805	462.718	594.307	453.785	540.971	282.108	585.103
1295	272.259	5.01365	192.804	4650.77	3662.12	3220.75	3942.35	3611.49	3647.17	3972.83	3526.74	3948.69	3918.95	3691.63	3445.39	3808.89	3716.01	3437.28	3604.04	3586.04	3783.47	4145.47	3604.65	3655.15	3915.53	3892.04	3630.54	4048.08	3752.88	3651.84	3685.87	3738.14	3963.16	4284.44	3859.16
1296	284.332	5.01365	201.717	126846	108899	99916.6	110160	101715	105160	107788	100227	111385	112900	103776	101846	108596	109522	103601	108560	100558	111705	114085	99863.1	103251	106046	103911	104496	109721	101094	97760.2	108990	102952	110199	114712	108648
1297	284.418	5.01365	201.714	607.71	540.304	430.074	581.27	476.734	488.782	540.554	438.303	570.17	586.721	462.588	454.073	511.032	510.93	457.142	495.257	469.47	519.999	577.675	447.047	505.136	502.871	488.198	498.961	529.179	487.649	415.894	515.701	517.286	570.653	601.285	531.866
1298	284.501	5.01365	201.711	931.607	940.414	773.614	954.585	869.851	803.619	951.666	693.436	980.14	992.293	727.058	752.876	937.067	821.457	769.109	854.814	867.731	923.262	877.517	868.051	906.965	971.293	831.519	927.131	850.833	883.01	710.407	811.367	876.269	982.348	1008.56	793.242
1299	284.635	5.01365	201.707	263.617	214.417	198.397	302.414	224.324	146.898	261.869	195.614	252.147	223.885	141.476	156.476	230.81	226.153	159.858	163.513	192.135	205.539	232.34	200.083	209.786	265.499	210.949	259.216	194.041	255.298	132.921	131.59	206	283.616	279.361	153.151
1300	284.732	5.01365	201.704	470.059	462.568	359.949	504.302	432.554	353.878	466.512	353.005	567.67	512.734	350.567	331.4	406.895	394.189	340.636	384.048	464.224	449.202	439.445	421.121	506.578	480.51	415.704	431.934	388.012	393.443	297.678	386.974	427.052	506.007	539.907	376.136
1301	284.802	5.01365	201.702	538.107	560.69	404.192	529.862	516.156	465.629	568.562	450.027	584.153	578.973	449.403	440.797	535.193	505.512	448.525	511.138	510.728	550.688	558.97	532.387	545.545	581.028	524.009	492.027	455.967	493.694	420.701	462.651	499.725	565.151	523.197	442.335
1302	285.58	5.01365	201.677	147.075	154.654	97.6251	149.503	99.2783	88.2687	134.774	83.2193	131.844	188.289	115.985	107.66	128.139	111.159	82.4178	105.975	138	119.135	102.238	158.01	115.651	149.262	124.577	129.994	120.168	157.175	82.1574	118.675	143.071	162.905	162.048	95.1142
1303	382.403	5.01365	214.305	572.735	582.905	479.855	511.864	500.193	524.097	539.874	483.459	518.383	599.408	512.586	495.06	510.59	530.824	494.814	533.447	481.881	539.664	563.583	480.027	506.955	514.317	502.748	525.794	512.02	468.156	475.412	494.199	471.849	517.173	540.792	505.661
1304	385.277	5.01365	202.354	991.55	939.034	791.042	783.668	867.328	878.411	810.284	715.165	1935.24	1869.62	1154.33	1170.35	1364.36	1234.15	1529.55	1097.32	1862.65	1377.54	1815.79	938.416	1477.68	1448.89	1483.29	1983.69	3112.08	3075.5	2252.73	3263.74	2191.91	2930.73	1885.71	2863.15
1305	393.741	5.01365	177.463	16.1922	186.52	322.233	45.0134	343.701	221.12	126.476	164.023	307.653	129.634	452.124	452.801	488.049	257.495	612.192	227.56	792.808	303.472	69.4909	306.948	648.792	342.304	503.373	653.451	364.691	1005.1	957.094	487.04	688.03	303.632	60.8212	388.12
1306	412.715	5.01365	174.001	0	51.1877	138.575	9.033	171.304	82.417	31.318	60.0222	64.2104	19.8094	268.784	282.236	212.651	105.25	383.759	78.2765	481.195	140.532	4.98492	127.087	318.175	174.902	279.746	328.06	115.783	574.979	690.187	213.314	354.243	66.0023	0	170.579
1307	453.175	5.01365	204.311	487.752	476.496	433.642	466.762	427.993	470.629	448.618	441.881	425.415	404.964	427.434	467.468	407.455	442.664	430.102	431.61	459.251	458.417	438.017	454.105	423.452	452.477	439.477	408.051	354.896	362.156	376.642	410.528	412.224	444.242	406.013	400.817
1308	607.509	5.01365	256.057	1925.75	1703.82	1435.32	1119.58	1756.69	1533.95	1229.43	994.794	5430.56	5032.11	3045.17	2840.53	3620.72	3051.04	4456.34	2085	5142.1	3129.37	4772.94	1780.02	3869.08	3284.89	3531.17	5487.89	8948.17	8722.34	6501.14	9024.73	5467.37	7725.64	4300.3	8307.52
1309	609.338	5.01365	221.616	1050.38	835.996	669.174	842.581	711.478	703.276	777.06	666.243	888.971	921.368	781.722	748.972	835.777	868.252	785.675	815.334	715.352	774.727	1002.44	700.234	673.145	833.55	774.146	794.961	832.317	724.898	656.15	828.418	695.153	877	984.748	826.746
1310	677.537	5.01365	268.657	498.017	490.759	412.077	493.119	417.183	440.575	472.003	380.968	609.046	647.773	431.663	499.924	531.714	535.301	519.136	504.183	510.582	487.512	606.819	406.006	519.688	535.516	517.238	518.14	854.607	692.313	596.738	776.993	580.41	825.262	640.106	758.736
1311	743.433	5.01365	262.954	885.856	867.174	808.86	757.817	889.57	885.01	803.848	701.345	1432.34	1325.99	1313.29	1211.13	1359.05	1229.95	1601.55	1043.17	2137.78	1276.93	1078.13	1077.98	1738.55	1311.14	1624.74	1931.37	1933.9	2760.49	2404.88	2131.22	2121.28	1449.56	1332.13	1930.63
1312	745.438	5.01365	264.253	1734.51	1516.28	1181.86	1245.25	1381.24	1473.13	1388.51	1161.14	2071.57	1950.08	1678.72	1572.12	1950.37	1795.71	1982.26	1584.61	1843.24	1577.54	1820.36	1183.55	1740.61	1653.51	1900.43	1927	1832.1	1948.46	2250.2	2115.8	1712.98	1763.68	1783.45	1876.65
1313	748.53	5.01365	277.199	26496.6	24742.6	21047.5	11618.2	25944.3	22506.8	16112.1	11522.4	87691.9	84084.8	48701	46707	57564.6	49582.1	69495.9	33672	77808.2	50836.1	76751.5	27633.6	61063.4	52558.1	57188.7	81638.2	123407	116357	94686.1	124083	82357.3	110042	68933.5	116903
1314	748.806	5.01365	275.912	10.162	22.0287	13.676	0	26.1299	8.55615	0	0	401.015	355.077	138.319	122.59	218.04	141.617	273.445	57.7996	403.471	201.796	343.129	64.7759	308.13	215.502	259.399	486.761	832.891	901.161	648.223	932.264	516.921	702.672	344.168	753.823
1315	748.922	5.01365	277.196	0	0	0	0	7.65058	0	0	0	141.114	115.461	45.1991	52.2536	61.2055	46.9444	101.276	12.8815	212.974	77.4607	125.849	15.3506	109.564	72.5032	104.175	202.018	356.016	433.335	294.463	411.89	233.213	287.068	119.355	350.523
1316	749.018	5.01365	278.477	0	2.89111	0	0	4.07001	0	0	0	263.431	217.923	75.2072	68.6238	118.203	73.957	179.9	21.9654	356.226	128.067	192.295	29.3398	216.875	143.263	190.398	359.097	640.896	745.537	552.704	653.261	415.976	551.025	219.609	525.111
1317	749.169	5.01365	277.194	0	4.58544	0	0	3.14868	0	0	0	161.594	140.673	49.4546	50.1005	74.3532	45.6394	122.385	12.9007	248.007	74.2472	124.434	21.6371	136.161	98.7942	120.435	256.245	432.778	507.684	333.613	466.04	265.974	348.417	144.765	372.752
1318	750.818	5.01365	277.183	14.5648	16.7427	13.7798	0	22.0523	9.24255	0	0	153.719	132.493	51.7043	54.389	67.8421	50.2374	119.623	29.599	113.641	31.1625	59.8745	6.03207	52.5021	33.9491	45.3134	108.344	174.95	194.82	151.77	165.054	90.6106	150.118	46.2616	171.549
1319	752.562	5.01365	284.826	30825.7	26747.4	22578.4	17448.8	28560.3	26071.3	21961.9	15699.9	51370.4	44279.4	38211.9	35882.9	43894.5	42034	53943.7	29754.5	39211.8	28541.3	40922.4	15313.7	34155.3	30202.8	31692.3	41101	56656.1	50009.6	40196.3	54193.2	45237.5	57259.9	31009.9	64818.6
1320	752.835	5.01365	283.554	8.7863	9.77017	0	0	13.7241	4.79492	0	1.60144	81.039	55.0207	51.3805	43.6954	70.2916	54.0926	134.821	17.9732	41.7009	16.7285	32.1206	0	44.4046	24.8554	41.1977	68.8919	101.161	109.977	64.5612	114.48	70.1507	114.198	8.7027	131.468
1321	767.501	5.01365	222.024	0	30.8768	18.119	0	63.4766	33.13	3.72217	10.5603	174.923	84.209	190.066	161.811	233.912	89.3711	413.821	38.09	517.548	109.266	52.9546	59.691	293.807	163.443	240.38	488.726	368.733	1088.75	755.268	619.062	465.108	259.004	7.23664	382.91
1322	768.003	5.01365	223.431	2.68756	7.16118	17.1467	0.807087	35.2459	13.9469	1.53316	0	120.556	37.227	71.2047	116.841	173.828	81.1572	278.243	37.9471	366.303	100.454	24.4505	30.919	241.123	95.2249	137.432	337.387	259.664	791.156	498.354	449.128	383.975	138.65	0	333.974
1323	770.512	5.01365	279.616	11175.2	9522.84	7251.73	4068.6	9578.17	7998.2	6196.67	4239.82	39682.5	39441.2	17647.7	13721.4	22151.2	20823	27249	13708.4	29103.1	19229.4	30397.8	8312.4	22755.4	17009.4	21856.8	32290.4	56382.8	48107.9	35817.9	57167.9	33740.1	43662.6	35598.6	54611.8
1324	774.626	5.01365	285.947	846.7	630.123	777.671	763.365	671.545	739.536	669.01	580.721	897.344	1057.44	733.092	651.114	696.444	803.838	794.566	780.153	676.105	716.584	844.474	609.236	701.835	754.407	703.472	801.698	954.807	914.98	709.5	948.629	836.032	939.469	975.141	873.536
1325	780.588	5.01365	289.693	8991.07	8968.83	7580.41	6021.2	9525.47	8695.04	7565.01	5332.52	14347.1	12356.3	12585.3	11705.8	14343.7	13525.5	17447.1	10104.5	12982.9	8741.05	12279.3	4988.47	11649.1	9924.37	10716.7	12617.9	18879.1	16092.4	13137.3	17712.6	15843	17734.7	9073.51	22019.2
1326	780.667	5.01365	292.203	149.09	156.105	191.71	131.058	151.94	126.929	160.259	121.535	193.582	187.72	171.271	155.12	191.965	190.749	188.973	138.069	135.348	197.66	180.392	148.005	164.874	201.088	175.851	152.786	208.11	187.746	177.06	203.995	164.528	229.079	183.318	193.801
1327	781.514	5.01365	224.768	0	8.28234	24.1714	4.38232	24.2214	33.6314	0	2.09292	170.331	66.4885	132.032	112.248	187.144	113.801	341.869	42.9501	307.057	92.0576	31.1706	17.7574	211.884	81.4613	170.285	333.668	418.502	707.202	570.419	499.528	343.918	265.559	18.0335	469.713
1328	782.016	5.01365	224.766	3.83976	10.5979	14.7822	0	24.7228	19.9137	3.24921	2.75711	120.301	53.2488	105.345	60.7083	159.616	77.3284	257.406	16.4972	218.566	52.9209	6.60739	10.1734	147.407	55.0721	137.684	185.156	283.833	539.916	440.619	342.879	293.578	171.345	7.68084	325.486
1329	786.482	5.01365	278.238	2117.02	3308.47	2699.01	1116.26	3714.01	3314.94	2583.06	1771.67	14734.5	16848.1	6426.25	3946.96	7989.58	6976.29	9593.28	4823.75	10999.3	6509.29	5683.23	2672.22	8517.73	4771.91	8444.98	12164.5	22697.4	17722	13311.2	21340.8	13281.2	9751.58	20301.8	21064.1
1330	793.518	5.01365	276.915	7619.58	7058.17	4973.69	5217.04	5797.5	6529.63	6095.07	4483.83	19220.9	20531	8632.46	5283.01	10005.7	12080.9	10560	8602.68	10352.7	10773.7	10452.2	4334.57	9823.87	6179.28	11233.8	13209.3	28889.2	14948	10267.1	24905.2	15238.3	9552.34	28429.2	26025.1
1331	802.571	5.01365	290.811	4157.65	3332.53	2545.38	2356.98	3175.5	2977.36	2785.79	1884.44	6832.46	6267.74	4621.05	4097.04	4928.65	5295.31	6124.04	3657.33	5020.26	3574.36	6016.87	2053.7	4229.25	4011.76	4078.12	5458.32	9207.32	7148.22	5419.3	8509.44	6168.01	8490.99	5319.46	9797.18
1332	805.438	5.01365	272.988	477.764	415.142	266.703	424.609	353.598	332.524	340.326	229.829	702.543	697.808	363.748	321.036	452.637	522.961	414.157	475.33	415.575	415.194	568.865	294.806	391.5	419.125	484.247	453.363	817.744	385.233	360.581	639.699	459.132	661.84	640.132	658.974
1333	846.453	5.01365	282.991	185.922	228.901	205.22	169.104	222.001	226.332	214.702	194.27	282.372	275.658	275.346	292.427	309.862	270.1	300.124	287.011	283.519	249.289	286.563	249.031	326.385	364.589	375.281	282.397	327.478	185.499	239.918	266.296	326.291	291.05	124.565	334.844
1334	959.464	5.01365	303.637	227.484	238.259	142.842	119.387	197.915	195.317	157.012	81.7526	505.149	490.491	277.719	247.938	361.256	392.653	356.871	291.091	354.631	340.838	476.008	130.279	322.559	328.395	363.448	370.465	465.203	377.481	302.557	441.661	398.915	495.466	507.458	491.842
1335	200.237	5.04745	179.772	2875.43	2349.22	2161.24	2363.57	2107.69	2222.17	2273.58	2086.96	2445.58	2484.65	2307.37	2283.87	2412.72	2403.4	2272.24	2326.43	2091.86	2542.86	2498.98	2058.08	2142.69	2243.95	2173.59	2280.65	2448.04	2149.12	1995.95	2473	2146.36	2332.98	2542.21	2448.78
1336	381.74	5.04745	176.051	6.27658	46.9725	79.6522	6.42003	78.8011	56.253	31.4528	41.8144	55.4664	40.9327	103.072	72.6051	103.526	52.8215	139.828	49.2168	128.753	53.1856	15.5282	51.5689	112.061	43.8414	67.0225	110.744	40.1532	146.209	129.1	59.0204	110.901	25.8865	5.11182	69.6237
1337	400.715	5.04745	172.559	0	39.8434	86.4495	9.49009	80.1831	60.0262	33.403	32.3825	25.3008	7.36317	103.832	125.65	99.9271	52.0035	131.681	39.3271	134.538	45.5612	0	55.5964	112.874	54.317	82.588	99.7616	26.6667	116.586	153.072	57.292	106.48	18.8936	0	47.0835
1338	414.739	5.04745	178.75	22.1065	101.767	181.374	56.5556	191.654	128.67	90.0287	118.5	149.33	81.0842	265.274	252.254	276.557	158.321	360.793	124.708	386.232	192.472	46.3521	206.027	325.396	216.005	278.341	358.087	163.507	483.084	503.357	285.846	390.875	111.138	37.5556	201.412
1339	433.72	5.04745	176.919	0	13.2001	21.2392	0	28.0139	21.212	8.87187	17.1605	12.4071	0	52.9128	48.5349	53.4481	10.0992	70.2302	8.41445	107.37	25.9059	0	43.2028	81.2851	46.6318	42.346	89.2129	20.7609	135.852	120.876	58.8278	87.6348	19.7194	0	29.9592
1340	583.508	5.04745	254.95	960.082	873.272	816.775	522.194	897.318	821.483	688.901	491.537	2331.04	1987.52	1425.39	1326.15	1598.71	1435.24	2126.4	977.979	1607.57	1074.51	1683.77	601.32	1317.17	1187.75	1205.34	1747.1	2403.96	2094.05	1704.13	2233.41	1646.34	2356.25	1143	2648.18
1341	611.541	5.04745	261.339	1431.59	1404.7	1186.08	836.826	1517.66	1342.24	1095.5	810.25	3048.46	2665.44	2181.18	1730.04	2514.45	2296.6	3210.14	1634.26	2283.33	1571.23	2167.48	822.238	1960.06	1588.82	1800.78	2450.03	3714.94	3105.36	2440.82	3417.64	2677.12	3363.31	1647.11	3975.8
1342	649.519	5.04745	262.325	1584.69	1372.73	1100.5	981.19	1382.5	1207.66	1093.21	846.409	5422.28	5867.54	2385.25	2168.76	3233.51	2786.08	4055.55	2003.87	4434.51	3040.52	5254.84	1820.38	3866.12	3328.21	3823.7	5468.58	10429.6	9226.17	6197.83	10835.2	6274.52	9203.41	6523.96	9866.64
1343	675.416	5.04745	251.476	276.554	244.037	243.175	295.272	238.919	256.717	275.183	243.301	254.234	265.338	242.89	257.439	291.594	261.869	254.27	271.65	197.818	274.338	276.345	244.193	285.966	286.873	250.051	247.068	218.423	198.266	196.407	212.238	235.563	233.26	307.064	224.89
1344	679.561	5.04745	269.944	706.814	603.147	444.112	552.224	450.711	497.775	520.937	386.236	950.087	852.114	595.512	557.89	665.207	688.74	705.765	604.588	629.986	578.276	802.135	445.222	510.074	620.02	605.785	694.423	1027.75	814.897	586.299	952.052	675.186	958.702	843.148	1011.75
1345	719.438	5.04745	260.48	909.36	911.829	929.039	791.076	964.045	914.24	833.511	767.863	1130.89	1068.49	1194.63	1143.76	1226.98	952.858	1309.78	981.227	1210.41	993.275	977.195	771.837	1128.32	995.22	1095.25	1177.2	1028.56	1170.52	1142.59	1045.39	1136.29	992.644	996.982	1052.2
1346	724.529	5.04745	276.079	26978.5	24045.7	20605	14701.8	22593.8	20453	17947.9	12643.2	51067	45640.9	34436.1	31606.8	36340.2	34130.1	44828.8	24575.4	33473.8	25989.8	38472.1	14315.9	28655.3	26535.4	27195.5	36022.3	49153	41402.5	34138.5	45426.5	36672.4	46639.7	27837	53456.3
1347	724.799	5.04745	276.077	17.9554	24.5432	14.8742	0	25.0088	16.5432	6.19397	0	165.681	120.501	48.6779	57.4062	70.9189	53.5068	134.164	25.0085	61.4116	36.0989	79.5374	0	52.5387	34.0555	45.8989	84.2891	114.718	95.2082	71.5731	101.072	73.5688	115.84	37.1381	137.673
1348	733.371	5.04745	247.046	362.729	301.432	283.804	336.105	288.613	336.507	308.761	227.823	384.271	403.257	341.71	299.505	361.966	357.029	327.503	340.559	338.288	326.994	388.853	274.585	335.522	329.814	331.997	359.525	334.488	321.738	306.144	332.392	351.101	340.277	429.064	347.779
1349	746.512	5.04745	275.927	8238.9	7018.25	5559.36	3756.93	6494.81	6021.98	5484.02	3461.18	19352.3	18311.1	10301.1	8376.54	11653.4	11594	14600.5	8175.67	10561.2	8578.67	13758.3	3814.45	9340.19	8077.05	9186.86	12533	18821	13889	11162.7	17392.7	11880.4	16691.9	12232	20403.1
1350	746.596	5.04745	287.399	332.429	365.321	293.95	361.242	308.508	331.761	311.183	285.467	369.312	449.528	260.929	276.698	335.053	381.491	264.78	408.671	301.759	297.098	357.932	235.141	322.908	308.717	254.687	303.912	399.7	382.475	286.731	418.45	311.231	428.976	461.839	472.892
1351	748.624	5.04745	279.76	778.464	777.183	788.723	763.415	742.861	719.009	774.716	605.813	995.167	1117.86	906.08	680.12	874.836	968.071	823.872	835.124	976.752	805.362	955.833	591.408	1015.07	876.466	783.348	1003.3	1214.57	1140.05	835.69	1012.28	1023.87	1158.88	1033.31	1170.39
1352	752.644	5.04745	281.009	1716.48	1049.46	893.379	1694.06	964.041	1154.55	1133.18	1006.24	1233.67	1309.79	959.576	811.931	633.654	1062.72	868.751	1084.62	1052.04	986.921	1065	877.072	927.223	900.282	693.275	948.556	969.192	1067.23	584.206	1108.96	998.406	1302.87	1610.66	1003.89
1353	753.384	5.04745	253.63	169.628	153.205	96.3682	147.135	116.211	139.042	146.856	117.644	168.543	209.808	134.685	144.202	129.757	178.674	134.975	135.773	151.841	151.627	167.238	126.541	171.746	165.582	168.297	170.353	169.891	129.327	147.4	143.759	170.967	172.577	178.182	147.553
1354	755.5	5.04745	222.086	0	5.32269	5.01315	0	17.5373	2.43103	0	0	85.8377	37.6176	57.9275	38.6974	54.3464	13.8808	94.3868	5.6604	90.2872	31.8752	18.7017	10.7122	68.5118	33.7662	35.9636	135.937	84.8408	172.57	123.361	135.926	133.891	71.9032	8.21452	94.269
1355	776.632	5.04745	285.934	320.637	320.433	289.536	308.58	294.827	286.164	252.082	205.993	371.091	350.546	363.747	352.462	341.413	318.667	409.775	266.634	419.995	379.007	395.827	332.436	344.279	362.7	330.127	382.586	456.464	457.833	362.617	426.953	360.706	466.724	377.236	418.61
1356	834.508	5.04745	285.588	3322.77	2586.29	1852.98	2211.98	2132.87	2301.99	2145.56	1550.1	5820.54	6572.11	3380.76	3230.91	4161.8	4289.73	4269.06	3541.93	4435.21	3961.32	6590.23	2592.36	4520.2	4739.16	4653.15	5187.79	7817.1	5484.63	4647.13	7345.05	5948.42	7130.07	7418.55	7804.81
1357	836.517	5.04745	289.357	5130.85	3728.26	2576.66	2842.27	3245.37	3307.88	2879.04	2132.57	11106.9	11977	5256.25	4816.52	6929.94	7746.15	7144.28	5334.43	9150.93	8243.28	15293.4	4792.08	8310.23	8837.68	8877.03	10432.8	16606.6	11291.9	9731.5	16268.3	11820	15925.7	20774.3	16316.5
1358	837.597	5.04745	288.093	126.638	152.901	135.01	155.082	110.642	125.379	122.84	102.377	148.971	149.905	159.701	129.116	142.647	125.104	141.677	138.293	150.426	124.947	187.965	116.3	150.646	134.842	145.68	108.952	167.355	140.437	138.544	147.308	165.03	182.088	164.292	166.052
1359	844.578	5.04745	298.049	915.391	786.648	645.198	579.885	773.988	720.844	579.066	420.517	1753.91	1427.3	1121.46	1189.82	1391.63	1300.44	1734.86	998.435	1483.22	897.586	1888.46	683.081	1404.66	1431.86	1359.26	1470.59	2151.39	1828.32	1615.88	1872.24	2003.9	2177.41	1254.42	2703.52
1360	848.478	5.04745	284.247	855.614	787.057	609.605	626.028	711.108	720.357	750.8	488.757	1264.83	1067.87	875.447	918.468	1033.25	973.873	931.833	992.926	859.451	868.413	1073	583.343	1016.1	1026.7	1092.08	983.517	1612.43	872.164	751.233	1242.76	1273.29	1306.4	1017.66	1665.36
1361	850.473	5.04745	286.763	751.329	720.598	588.734	520.398	622.783	683.76	585.365	448.664	1273.56	1319.44	897.587	877.795	1055.57	1084.01	1060.21	937.117	1058.92	1061.92	1322.66	606.994	1138.2	1075.08	1189.72	1230.38	1495.54	1030.64	1016.74	1306.12	1277.74	1338.25	1371.05	1512.74
1362	919.499	5.04745	295.177	859.461	786.769	565.8	657.026	677.759	704.515	683.972	394.606	1290.96	1363.62	973.691	928.001	1083.12	1049.17	1150.08	998.53	1130.1	1063.72	1397.51	696.758	1207.65	1256.08	1242.45	1236.22	1576.94	1166.71	1045.22	1437.13	1451.14	1439.6	1238.04	1583.41
1363	932.461	5.04745	297.597	360.694	321.237	235.687	221.294	297.811	249.899	238.603	177.407	521.418	490.334	389.441	375.828	409.083	440.883	393.331	379.966	392.986	405.183	596.623	232.349	395.281	483.581	449.45	432.35	436.799	326.941	305.694	373.836	438.337	509.37	510.963	465.518
1364	951.53	5.04745	302.444	153.388	171.105	119.016	103.137	141.571	158.35	111.385	84.8926	220.362	225.637	202.888	153.664	210.476	218.494	214.85	172.146	233.546	182.805	179.175	121.998	203.263	169.012	176.765	189.283	216.932	177.495	171.096	217.338	219.521	189.875	212.523	214.072
1365	974.447	5.04745	302.343	73.8356	71.7446	33.9304	24.3736	58.0607	55.5812	60.2265	7.97873	226.114	203.815	123.299	45.8263	145.227	174.565	154.936	120.815	136.358	131.225	152.574	25.4361	162.562	101.14	145.817	129.789	197.232	136.96	125.224	131.219	170.209	173.24	211.723	187.929
1366	978.458	5.04745	302.325	722.225	625.471	371.049	392.115	437.054	507.376	467.046	259.025	1281.72	1287.17	716.925	680.466	829.989	1002.29	869.005	789.262	858.13	863.356	1318.69	399.973	869.805	980.691	889.371	1006.73	1360.26	901.816	785.077	1255.36	1052.84	1336.61	1522.22	1344.99
1367	982.496	5.04745	305.984	126.902	143.646	103.969	84.2093	97.9321	148.585	104.538	62.703	319.852	324.493	193.623	132.158	216.486	292.752	217.959	200.408	214.076	227.413	272.382	78.6042	232.614	220.679	234.981	245.047	284.993	234.187	149.908	308.566	243.435	252.746	312.834	274.812
1368	987.528	5.04745	304.739	169.631	132.428	125.031	152.89	119.885	139.992	119.855	81.9603	234.538	219.62	185.789	171.34	176.694	186.207	199.281	161.819	202.867	180.606	267.526	112.648	223.302	208.314	176.331	198.029	226.089	221.841	190.022	229.144	223.037	206.025	210.757	208.143
1369	994.409	5.04745	304.71	757.078	556.146	347.072	370.035	400.247	405.711	492.909	253.17	1206.96	1164.43	712.241	604.358	763.716	938.689	814.274	701.252	818.684	732.692	1239.74	408.845	829.252	913.016	839.274	925.19	1208.21	870.872	796.641	1086.49	969.233	1330.38	1301.68	1228.47
1370	994.609	5.04745	308.372	1810.28	1732.68	1133.17	1728.09	1197.12	1443.88	1456.3	1076.6	1874.02	1863.08	1453.62	1455.18	1636.19	1968.73	1574.74	1739.17	1447.49	1690.29	2002.03	1245.23	1527.05	1783.66	1563.76	1628.37	1880.45	1504.3	1350.93	2000.04	1621.4	2016.03	1963.55	2001.22
1371	1027.58	5.04745	308.237	359.197	273.961	195.871	293.97	244.17	253.063	280.854	178.962	495.929	461.425	271.217	306.598	396.45	386.328	372.757	343.917	357.782	332.937	490.553	214.624	337.48	401.139	350.604	420.085	466.895	359.456	322.993	518.129	409.922	470.893	429.983	452.137
1372	1033.63	5.04745	315.479	326.389	174.905	141.81	187.209	184.938	177.136	209.899	111.207	272.846	348.592	238.375	188.183	219.67	290.219	231.434	223.53	240.55	229.434	262.258	140.458	247.504	231.981	202.777	259.418	275.136	259.926	219.409	308.988	250.782	308.325	319.986	303.253
1373	1079.66	5.04745	322.492	4309.97	3304.38	2407.24	3443.36	2638.11	2928.66	3156.52	2428.33	3555.23	3717.5	2906.25	2862.29	3138.09	3492.58	2929.28	3384.87	2758.12	3269.11	3824.06	2537.33	2811.68	3186.7	3015.58	3030.2	3378.09	2813.89	2481.66	3528.14	3060.7	3545.86	3928.26	3500.35
1374	233.077	5.08127	164.867	401.926	361.9	349.693	386.121	344.899	325.883	372.78	346.334	353.463	368.729	332.803	344.391	369.763	375.382	374.734	355.99	346.825	357.359	358.833	367.262	349.031	356.03	351.918	361.159	334.666	354.265	341.174	350.306	349.579	358.175	362.699	348.102
1375	347.102	5.08127	183.022	174.848	136.999	126.858	165.056	144.007	138.3	156.666	118.473	134.071	142.324	123.644	112.591	114.811	140.529	130.17	150.986	112.904	186.102	146.871	124.449	104.588	186.427	135.025	110.721	116.621	99.5897	114.673	106.569	105.103	102.399	146.769	119.258
1376	415.752	5.08127	180.317	29.9927	151.75	204.496	67.3621	285.265	231.539	132.188	141.472	252.705	125.583	413.804	445.284	459.355	286.113	626.202	213.11	817.45	386.899	104.924	381.691	627.437	369.324	564.47	692.504	504.696	1040.01	971.736	664.696	869.283	371.971	101.178	556.022
1377	416.254	5.08127	180.31	0	28.0208	38.3221	0	60.7071	30.8889	15.6378	37.4544	34.5684	11.8893	101.251	87.6689	76.9957	62.1447	163.366	37.3127	207.681	73.5631	36.292	78.6941	170.87	111.588	109.846	158.336	104.322	254.671	267.211	160.091	229.964	104.56	17.1235	139.212
1378	434.727	5.08127	178.49	0.979786	45.2067	66.4584	14.3147	127.947	68.8401	30.4093	37.8138	83.4253	24.2777	177.104	202.18	196.4	89.1993	294.799	83.4424	464.6	130.082	7.64747	209.471	376.899	181.8	284.521	351.472	110.178	661.207	553.262	228.314	411.087	78.2351	14.3848	173.777
1379	456.222	5.08127	199.785	464.109	372.807	372.455	427.289	409.051	433.053	405.743	403.813	379.775	405.503	437.389	414.9	411.056	382.933	412.02	415.267	387.061	398.653	430.949	397.96	412.89	411.429	416.091	425.565	367.101	410.281	357.232	387.49	405.795	394.856	431.754	386.046
1380	503.221	5.08127	206.678	549.261	560.618	404.329	530.995	476.724	508.042	534.225	477.766	583.622	540.855	565.724	551.402	544.812	610.451	561.932	555.808	532.919	585.257	563.608	528.211	607.743	636.513	565.346	572.705	543.258	606.498	563.278	627.263	631.863	573.5	555.318	524.746
1381	651.536	5.08127	266.254	3147.78	2741.02	2193.85	1759.89	3077.71	2623.89	1843.04	1416.91	14303.7	13141.5	6267.07	5678.85	8780.67	8064.74	10983.9	4283.14	15934.5	9356.72	16672.5	5428.28	11800	10487.8	11882.4	16529.3	34120.4	26260.2	20486.3	32188.2	21072	29026.5	20809.6	31227.6
1382	651.613	5.08127	266.253	272.25	220.422	203.77	192.352	197.842	248.414	174.217	155.729	512.908	618.81	417.759	391.597	401.415	354.623	445.769	321.187	589.347	411.328	567.839	338.066	573.116	467.982	432.853	747.151	1243.72	1239.42	617.029	751.604	710.093	1092.42	925.886	811.858
1383	651.793	5.08127	264.939	0	0	0	0	0	0	0	0	38.5099	29.7909	4.89199	0	10.2088	0	18.5398	0	48.0833	15.1956	53.0392	0	25.614	15.7466	22.8752	51.0385	207.188	142.698	66.9094	179.435	87.3498	144.983	87.8471	154.645
1384	710.539	5.08127	269.711	445.116	374.854	278.683	334.971	285.715	282.625	334.189	263.935	365.503	368.782	296.431	295.061	331.05	335.291	292.375	314.764	256.154	334.265	332.216	277.938	300.569	314.691	291.994	297.799	263.079	232.31	241.751	287.118	287.914	318.762	347.067	281.241
1385	770.644	5.08127	280.892	456.122	518.463	707.459	392.738	653.255	608.596	454.01	373.519	599.43	704.657	674.654	497.929	734.683	547.2	604.812	399.71	675.651	642.603	756.188	403.766	764.846	581.515	439.364	551.648	703.023	989.64	600.003	640.377	865.203	842.48	751.34	798.003
1386	777.512	5.08127	224.788	11.0877	53.7458	91.2507	6.87202	195.096	107.707	29.2665	29.3385	351.235	153.099	356.517	353.985	444.46	253.955	849.82	115.506	807.85	219.293	69.2447	77.6157	554.865	301.48	418.238	741.665	832.24	1421.17	1245.51	880.596	970.253	519.013	31.3428	985.81
1387	778.014	5.08127	224.786	6.74739	25.5213	41.1023	5.91846	101.902	47.3952	21.8458	8.443	271.71	107.445	267.071	217.698	328.232	165.869	516.053	70.6818	554.642	165.76	60.3696	66.4723	333.793	177.298	293.221	441.289	485.021	894.487	751.848	616.235	576.872	345.376	27.9696	613.751
1388	790.537	5.08127	285.846	26544.1	22061.6	17096.5	13290.3	22604.8	21128.4	16481.6	11659.5	76411.2	75716.9	38824.6	35639.3	49884.9	48401.6	63039.3	30526	67197.3	44911.5	79412	24507.9	55857	51568.6	56362.5	73811.7	126914	105953	82735.7	126597	87519.8	118885	85082.7	126786
1389	790.654	5.08127	285.845	221.244	315.201	215.299	245.968	212.41	223.218	227.776	201.938	349.627	339.611	254.781	233.639	309.696	331.102	267.712	238.867	304.964	285.257	383.96	224.729	311.76	324.028	345.069	341.672	702.531	509.302	380.52	577.768	482.063	741.772	337.459	616.565
1390	791.526	5.08127	226.12	2.82032	34.1641	50.7366	18.6685	115.572	36.9004	13.6028	14.4574	205.542	101.3	182.612	209.51	277.936	130.775	501.166	64.4055	648.326	155.443	54.1236	61.9367	351.801	210.972	318.608	507.774	459.168	840.747	780.755	537.089	613.486	383.741	22.1759	553.242
1391	792.03	5.08127	226.118	5.89742	24.2896	50.0581	0.109714	68.6909	37.2204	1.95883	4.29371	146.639	39.4668	103.746	110.285	189.213	98.6584	297.135	55.9899	414.088	70.326	33.6343	30.7036	211.611	91.0503	165.189	273.827	296.453	493.689	448.71	338.725	459.809	196.31	6.47118	348.618
1392	792.552	5.08127	282.029	26755.9	22282.1	17723	13582.4	23331.8	21674.8	15794.5	11701.8	84716.8	78461.7	44019.1	41745.6	56840.5	52755.8	69355.9	31815.6	87742.5	58603.7	96046.4	37325.3	68415	66555.6	70218.1	91138.9	151424	132163	104669	148942	110508	142546	104362	144133
1393	792.666	5.08127	285.833	1060.4	1213.76	1269.2	1111.2	1341.79	1312.73	1006.46	572.017	4348.98	3454.9	2045.16	2017.89	1359.25	1994.39	2619.57	1621.83	5379.57	3429.44	4384.97	2212.53	3831.99	2810.06	2964.55	4856.37	12202.5	9295.88	3087.95	10867.3	6017.38	12575.3	8184.15	8639.14
1394	792.839	5.08127	284.566	22.5878	11.392	5.5914	0	25.0977	17.8791	0	0	430.578	378.51	97.7611	95.2657	173.341	175.009	254.579	56.1125	514.467	266.9	562.84	129.229	341.351	307.482	366.809	527.422	1335.28	1046.22	672.495	1285.38	737.46	1107.74	905.52	1125.48
1395	793.209	5.08127	284.564	0	0	0	0	0	0	0	0	116.847	91.6236	22.0886	17.8266	44.4762	36.4248	53.8363	0	183.046	80.5666	181.146	41.7084	102.486	88.1482	108.646	168.16	458.342	366.532	231.609	425.55	254.135	381.857	339.729	359.341
1396	794.842	5.08127	284.554	0	0	0	0	0	0	0	0	53.2932	30.1522	8.00272	8.17368	15.4754	17.6197	34.8005	0	60.3114	27.1672	69.4745	10.3388	36.5803	23.7491	36.1098	69.0708	166.662	131.726	94.3255	151.806	97.8926	149.034	107.455	145.728
1397	799.525	5.08127	227.479	14.1153	53.7162	62.3556	2.7782	107.553	75.201	30.4329	31.8226	475.351	170.067	317.294	325.912	513.865	243.511	765.328	112.27	1137.3	349.526	146.904	181.977	726.978	419.276	547.242	967.231	943.749	1922.31	1517.09	1219.64	1464.31	849.487	116.464	1113.79
1398	800.027	5.08127	227.476	0.707781	31.2387	32.5223	2.06272	66.1044	43.8858	16.5953	4.0159	217.341	113.084	189.411	184.712	284.615	161.815	522.948	52.6656	756.453	230.96	91.6953	117.037	462.582	257.265	371.851	642.585	623.407	1219.52	918.921	861.569	889.81	460.874	89.3428	705.309
1399	811.017	5.08127	228.817	0	0	1.68214	0	10.8918	2.86654	0	0	45.1242	33.2235	38.3978	36.4629	56.1018	33.1306	64.1912	12.9047	152.034	34.5857	23.2858	28.431	113.666	70.0716	65.0694	160.642	179.343	369.954	169.578	204.198	229.915	136.706	37.0206	151.362
1400	811.524	5.08127	228.815	0	11.4911	24.1524	1.79495	55.0996	23.0068	5.33224	3.75403	216.121	73.9394	134.186	151.33	210.659	108.502	287.778	30.1822	663.678	183.406	56.4458	67.2767	363.136	199.313	238.459	585.006	645.386	1267.71	881.004	825.017	793.633	461.745	103.598	615.066
1401	812.026	5.08127	228.813	0	5.14754	8.53938	2.10189	21.1737	8.11685	2.81359	0.988009	141.525	70.3967	83.509	88.7547	135.487	78.785	258.052	26.9907	392.44	136.029	49.4307	57.3468	233.929	115.119	209.555	354.856	423.351	826.315	572.341	571.622	523.77	333.059	60.4534	421.525
1402	812.517	5.08127	286.977	12304.7	8629.91	6174.23	5902.8	7973.24	7766.32	6670.68	4363.02	28052.3	30182.6	13150.1	12385.9	16629.5	17719.2	19770.5	12182.7	20030.8	16237.6	30919.7	8864.62	18213.3	18253.2	18574	24443	41226.1	31787.9	24766.4	41407.5	26403.3	39864.4	34194.7	40164.7
1403	812.615	5.08127	288.237	608.723	590.732	468.333	486.374	445.738	479.947	487.18	390.009	720.394	611.638	683.279	450.357	508.451	635.851	508.948	547.325	589.229	530.646	608.788	434.049	571.676	652.71	562.643	632.766	973.335	705.643	497.017	972.105	747.731	1027.39	757.053	1120.25
1404	814.535	5.08127	289.483	13101.9	9873.9	7306.01	6825.87	9707.38	9064.24	7217.47	5343.91	40736.7	38385.8	17616.1	17091.4	23888.9	24106.4	29157.8	14187.3	37857.5	25624.1	48418	15189.5	30075.5	29864.1	30826.7	41302.3	79482.8	62192.4	45987.6	76989.7	50525.3	75162.5	58831.2	74971.1
1405	814.825	5.08127	293.242	0	0	0	0	0	0	0	0	103.611	113.373	11.3714	8.81235	27.8509	21.5099	33.1716	3.49496	108.395	37.7195	162.278	18.1222	54.2291	38.2759	59.8357	110.172	394.184	269.147	147.486	382.62	153.81	335.865	313.791	318.223
1406	818.499	5.08127	228.782	0	6.44415	10.7938	5.68674	26.0698	8.00211	3.28769	0	79.1862	7.55002	55.0085	82.7052	86.1022	47.3669	145.738	3.43594	194.794	57.713	14.0023	13.4677	126.333	67.5603	94.1821	157.86	104.345	282.789	226.907	157.096	221.471	47.9579	5.01233	149.114
1407	822.59	5.08127	293.196	2775.7	2306.46	1767.65	1711.6	2315	2181.69	1815.83	1338.72	4723.81	4083.68	3398.36	3441.62	3765.51	3712.09	4706.92	2834.63	4146.52	2707.21	5022.94	1871.22	3689.64	3707.55	3654.42	3981.12	5923.91	4875.09	4191.42	5118.29	5194.92	5435.82	3499.4	6749.54
1408	828.492	5.08127	288.145	2127.4	1966.72	1390.06	1412.38	1724.03	1746.9	1575.03	1198.16	4252.67	4287.44	2556.84	2549.44	3229.84	3096.88	3721.23	2412.85	3793.69	2826.02	4546.48	1946.1	3587.72	3598.94	3780.5	4238.92	6513.63	5461.73	4620.66	6070.66	5334.44	5717.32	4740.39	6642.67
1409	830.507	5.08127	290.646	3595.21	3548.09	2828.72	2745.66	3455.72	3465.26	2948.56	2263.18	9176.07	8330.32	5695.85	5439.06	7309.66	6580.21	8285.87	5006.27	11575.1	7222.82	10034.8	5152.66	9341.27	8718.41	10054.4	11673.5	21116.8	17629.1	13747.1	19304.1	16297.1	16908.4	12077.5	20375.6
1410	850.601	5.08127	300.49	351.39	262.365	247.464	279.811	250.837	254.413	281.491	215.72	387.915	316.528	294.826	352.163	361.436	305.718	354.986	331.134	416.898	318.145	460.758	291.037	391.738	449.67	400.498	424.011	645.521	578.562	459.686	584.118	540.72	792.163	394.403	624.704
1411	852.491	5.08127	290.524	2995.04	2588.44	1839.85	2215.61	2115.02	2220.59	2236.9	1651.73	3900.96	4033.89	2779.14	2784.43	3270.09	3340.77	3159.31	3140.99	3549.47	3237.05	4949.69	2331.05	3757.29	3870.83	3946.48	3968.22	5683.62	3585.06	3371.16	4665.18	4796.16	4707.89	5183.05	5800.72
1412	888.479	5.08127	290.337	916.098	953.412	727.823	633.642	926.103	831.428	781.662	541.878	1480.49	1323.14	1236.31	1192.63	1471.93	1396.94	1475.02	1190.8	1633.24	1278.86	1289.85	1038.28	1661.63	1628.74	1698	1634.82	2033.55	1570.73	1542.03	1685.51	1983.33	1532.44	1205.73	2068.92
1413	907.455	5.08127	295.235	252.92	220.553	124.025	146.369	166.991	198.647	151.01	107.161	398.45	398.202	276.263	202.721	259.457	300.401	237.043	256.037	236.784	233.495	354.428	98.5924	255.554	271.298	269.683	255.507	350.458	188.592	195.666	285.234	268.293	298.561	384.045	296.493
1414	921.495	5.08127	296.41	1872.33	1526.66	1101.01	1117.09	1309.5	1365	1242.44	837.907	2713.92	2703.63	1885.76	1709.08	2116.01	2302.58	2126.41	1857.36	2069.72	2070.36	3088.89	1283.17	2107.65	2190.45	2236.8	2298.09	3052.56	2080.73	1998.96	2815.1	2549.44	2953.32	3347.89	3027.32
1415	935.477	5.08127	298.821	2425.1	1835.54	1200.52	1312.51	1467.92	1540.74	1494.07	890.101	3488.12	3309.16	2163.75	2192.71	2547.36	2902.15	2613.33	2286.48	2552.07	2375.08	3636.82	1427.02	2582.11	2726.51	2776.91	2813.59	3878.27	2649.94	2485.14	3545.2	3236.75	3837.22	3788.38	3864.59
1416	976.575	5.08127	306.01	749.119	616.39	438.283	566.35	471.799	525.042	526.544	398.712	863.637	791.118	636.494	662.607	704.281	822.874	770.207	621.044	766.081	678.224	844.132	475.051	744.37	762.127	782.647	786.834	923.475	805.968	719.065	954.363	791.239	908.411	841.468	968.763
1417	1000.54	5.08127	308.347	183.947	148.646	116.942	111.624	154.7	139.304	137.614	59.706	285.105	258.61	229.867	198.257	241.35	243.954	286.696	192.696	272.221	262.644	288.664	129.761	257.445	251.665	244.765	288.716	272.867	248.782	206.45	286.953	302.825	307.679	262.828	309.087
1418	1023.59	5.08127	311.895	397.589	349.558	170.177	232.914	235.583	226.118	259.511	154.153	473.68	446.271	316.138	327.75	343.25	420.763	336.832	292.378	317.714	308.484	430.005	203.51	296.366	368.631	354.454	386.609	450.001	398.296	287.707	533.664	417.392	505.839	481.395	457.651
[truncated: 1,102 more rows]

## Sheet: Raw Negative Mode
	m/z	Retention Time (min)	CCS (angstrom^2)	E12-WT1	E12-WT2	E12-WT3	E12-WT4	E12-KO1	E12-KO2	E12-KO3	E12-KO4	E14-WT1	E14-WT2	E14-WT3	E14-WT4	E14-KO1	E14-KO2	E14-KO3	E14-KO4	E16-WT1	E16-WT2	E16-WT3	E16-WT4	E16-KO1	E16-KO2	E16-KO3	E16-KO4	P0-WT1	P0-WT2	P0-WT3	P0-WT4	P0-KO1	P0-KO2	P0-KO3	P0-KO4
[truncated: 4,867 more rows]
