# Supplementary material for: Temporal changes in the brain lipidome during neurodevelopment of Smith–Lemli–Opitz syndrome mice
Source: Royal Society of Chemistry journal article supplement (doi:10.1039/d2an00137c), 2022-01-01
Supplement: d2an00137c3.xlsx [file d2an00137c3.xlsx]

## Sheet: Normalization
Sample	Weight (mg)	POS IS	NEG IS
E12-WT1	24.3	17583	115339
E12-WT2	21.7	14482.7	116304
E12-WT3	23.7	11993.3	94204
E12-WT4	15.7	15533.2	112256
E12-KO1	21.7	14640.6	89025.1
E12-KO2	21.2	13802.5	117643
E12-KO3	16	16010	117234
E12-KO4	17.4	12940	115546
E14-WT1	54.1	20072.4	126433
E14-WT2	47.8	20903.5	106277
E14-WT3	37.1	18227.9	130854
E14-WT4	32.7	19571.9	102433
E14-KO1	32.1	16790	124351
E14-KO2	35.7	17039.6	119248
E14-KO3	40.9	15807.2	134346
E14-KO4	29.2	21257.3	134799
E16-WT1	32.8	17477.9	133201
E16-WT2	33.5	17351.7	142853
E16-WT3	33.3	21830.6	137528
E16-WT4	27.95	18645.2	121911
E16-KO1	27.45	18041.5	141955
E16-KO2	27.15	19682.3	104782
E16-KO3	28.3	17246.5	121724
E16-KO4	30.75	18175.9	133448
P0-WT1	54.1	34083.9	126570
P0-WT2	50.85	18572.7	118767
P0-WT3	48.85	19264.9	142977
P0-WT4	41.35	23574.6	113474
P0-KO1	45.65	23487.3	160423
P0-KO2	40.05	24333.9	146044
P0-KO3	38.85	25064.6	137855
P0-KO4	47.4	32729.5	133851
