# Supplementary material for: Temporal changes in the brain lipidome during neurodevelopment of Smith–Lemli–Opitz syndrome mice
Source: Royal Society of Chemistry journal article supplement (doi:10.1039/d2an00137c), 2022-01-01
Supplement: d2an00137c4.xlsx [file d2an00137c4.xlsx]

## Sheet: Positive ID Lipids
Compound	m/z	rt	ccs	Lipid	Adduct	Alternative ID				m/z error	Red Text = Manual ID
	(Da)	(min)	(Å²)							(ppm)
245	381.315	0.46415	208.412	DG(20:1)	[M+H-H2O]+	MG(20:3)_[M+H]+				37.9
372	461.363	0.585367	223.173	DG(26:3)	[M+H-H2O]+					-0.6
274	543.344	0.46415	232.092	DG(28:4)	[M+K]+					-2.7
73	523.474	0.430333	248.861	DG(30:0)	[M+H-H2O]+					2.5
84	579.429	0.430333	244.168	DG(30:0)	[M+K]+	DG(32:6)_[M+Na]+				-17.5
72	521.451	0.430333	246.16	DG(30:1)	[M+H-H2O]+					-12.3
77	551.506	0.430333	255.289	DG(32:0)	[M+H-H2O]+					3.2
76	549.49	0.430333	252.621	DG(32:1)	[M+H-H2O]+					2.6
85	579.536	0.430333	261.655	DG(34:0)	[M+H-H2O]+					0.8
94	619.522	0.430333	258.613	DG(34:0)	[M+Na]+					-9.5
83	577.52	0.430333	259.019	DG(34:1)	[M+H-H2O]+					1.3
81	575.505	0.430333	255.031	DG(34:2)	[M+H-H2O]+					1.9
93	615.476	0.430333	254.647	DG(34:2)	[M+Na]+					-33
90	607.567	0.430333	267.962	DG(36:0)	[M+H-H2O]+					0.4
101	647.549	0.430333	264.975	DG(36:0)	[M+Na]+					-15.5
88	603.536	0.430333	261.415	DG(36:2)	[M+H-H2O]+					2
106	659.528	0.430333	262.243	DG(36:2)	[M+K]+					40.2
87	601.518	0.430333	258.78	DG(36:3)	[M+H-H2O]+					-2.1
98	634.532	0.430333	261.132	DG(36:4)	[M+NH4]+	Cer(d40:6)_[M+Na]+				-13.9
97	632.537	0.430333	259.825	DG(36:5)	[M+NH4]+					18
107	662.569	0.430333	267.472	DG(38:4)	[M+NH4]+	Cer(d42:6)_[M+Na]+				-4.9
95	623.505	0.430333	259.905	DG(38:6)	[M+H-H2O]+					1.3
306	701.616	0.46415	267.169	DG(40:1)	[M+Na]+					13.5
105	653.548	0.430333	266.237	DG(40:5)	[M+H-H2O]+					-3.7
305	683.607	0.46415	271.213	DG(42:4)	[M+H-H2O]+					14.1
307	723.594	0.46415	268.318	DG(42:4)	[M+Na]+					5.8
21	285.233	0.430333	193.956	MG(14:0)	[M+H-H2O]+
27	313.274	0.430333	200.879	MG(16:0)	[M+H-H2O]+
331	307.226	0.517733	188.646	MG(16:3)	[M+H-H2O]+
36	341.304	0.430333	207.751	MG(18:0)	[M+H-H2O]+
34	339.286	0.430333	203.281	MG(18:1)	[M+H-H2O]+
333	369.331	0.517733	205.656	MG(20:0)	[M+H-H2O]+
246	383.327	0.46415	206.885	MG(20:2)	[M+H]+
241	365.318	0.46415	205.736	MG(20:2)	[M+H-H2O]+
239	363.304	0.46415	204.275	MG(20:3)	[M+H-H2O]+
334	398.34	0.517733	211.069	MG(20:3)	[M+NH4]+
237	361.281	0.46415	202.809	MG(20:4)	[M+H-H2O]+
336	431.315	0.517733	213.474	MG(24:6)	[M+H]+
335	429.304	0.517733	212.039	MG(24:7)	[M+H]+
414	740.66	0.672767	288.703	TG(42:0)	[M+NH4]+
123	796.736	0.430333	304.515	TG(46:0)	[M+NH4]+
132	827.707	0.430333	305.55	TG(48:1)	[M+Na]+
130	822.754	0.430333	308.031	TG(48:1)	[M+NH4]+
127	820.735	0.430333	305.592	TG(48:2)	[M+NH4]+
310	850.786	0.46415	315.163	TG(50:1)	[M+NH4]+
143	853.719	0.430333	310.288	TG(50:2)	[M+Na]+
139	848.77	0.430333	311.534	TG(50:2)	[M+NH4]+
135	844.73	0.430333	309.121	TG(50:4)	[M+NH4]+
153	881.757	0.430333	316.195	TG(52:2)	[M+Na]+
314	876.801	0.46415	318.634	TG(52:2)	[M+NH4]+
152	879.739	0.430333	314.997	TG(52:3)	[M+Na]+
149	874.783	0.430333	316.234	TG(52:3)	[M+NH4]+
148	872.762	0.430333	316.245	TG(52:4)	[M+NH4]+
146	868.73	0.430333	313.848	TG(52:6)	[M+NH4]+
145	866.728	0.430333	310.214	TG(52:7)	[M+NH4]+
318	902.813	0.46415	323.29	TG(54:3)	[M+NH4]+
161	905.756	0.430333	319.679	TG(54:4)	[M+Na]+
159	898.777	0.430333	320.917	TG(54:5)	[M+NH4]+
160	901.72	0.430333	318.498	TG(54:6)	[M+Na]+
158	896.769	0.430333	320.927	TG(54:6)	[M+NH4]+
157	894.752	0.430333	317.331	TG(54:7)	[M+NH4]+
320	928.826	0.46415	329.105	TG(56:4)	[M+NH4]+
172	931.765	0.430333	326.715	TG(56:5)	[M+Na]+
171	929.755	0.430333	325.535	TG(56:6)	[M+Na]+
170	924.799	0.430333	326.751	TG(56:6)	[M+NH4]+
168	922.784	0.430333	324.379	TG(56:7)	[M+NH4]+
167	920.765	0.430333	321.999	TG(56:8)	[M+NH4]+
174	944.749	0.430333	325.46	TG(58:10)	[M+NH4]+
322	954.839	0.46415	334.878	TG(58:5)	[M+NH4]+
177	950.812	0.430333	331.361	TG(58:7)	[M+NH4]+
176	948.796	0.430333	330.188	TG(58:8)	[M+NH4]+
175	946.768	0.430333	326.64	TG(58:9)	[M+NH4]+
182	972.795	0.430333	333.613	TG(60:10)	[M+NH4]+
181	970.775	0.430333	331.263	TG(60:11)	[M+NH4]+
180	968.766	0.430333	330.091	TG(60:12)	[M+NH4]+
183	976.825	0.430333	337.118	TG(60:8)	[M+NH4]+
191	1000.81	0.430333	339.346	TG(62:10)	[M+NH4]+
192	1026.82	0.430333	343.887	TG(64:11)	[M+NH4]+
1850	530.321	6.20027	223.765	LPE(22:4)	[M+H]+					-7.1
955	497.318	3.37598	224.137	LPG(o18:1)	[M+H]+					-12.4
2159	678.509	6.66548	268.65	PC(28:0)	[M+H]+					1.8
2137	706.541	6.63167	276.21	PC(30:0)	[M+H]+					3.5
2149	744.497	6.63167	281.065	PC(30:0)	[M+K]+					2.6
2143	728.522	6.63167	278.619	PC(30:0)	[M+Na]+	PC(32:3)_[M+H]+	PC(o30:1)_[M+K]+			1.4
2108	704.525	6.59785	271.054	PC(30:1)	[M+H]+					2.4
2113	726.505	6.59785	273.486	PC(30:1)	[M+Na]+	PC(32:4)_[M+H]+	PC(o30:2)_[M+K]+			0.6
2041	702.505	6.5639	268.468	PC(30:2)	[M+H]+	PC(o28:0)_[M+K]+				-3.1
2115	734.571	6.59785	283.681	PC(32:0)	[M+H]+					1.9
2045	732.556	6.5639	282.423	PC(32:1)	[M+H]+					2.4
2076	770.51	6.5639	287.237	PC(32:1)	[M+K]+					-0.8
1980	730.539	6.51032	276.037	PC(32:2)	[M+H]+	PC(o30:0)_[M+K]+				0.9
2059	760.587	6.5639	283.503	PC(34:1)	[M+H]+					2.3
2087	798.542	6.5639	295.837	PC(34:1)	[M+K]+					0.5
1984	758.571	6.51032	282.244	PC(34:2)	[M+H]+	PC(o32:0)_[M+K]+				1.1
1988	780.554	6.51032	284.642	PC(34:2)	[M+Na]+	PC(36:5)_[M+H]+	PC(o34:3)_[M+K]+			2.1
1946	778.538	6.44268	278.287	PC(34:3)	[M+Na]+	PC(36:6)_[M+H]+	PC(o34:4)_[M+K]+	PC(p34:3)_[M+K]+		2.8
2054	754.538	6.5639	282.271	PC(34:4)	[M+H]+	PC(32:1)_[M+Na]+	PC(o32:2)_[M+K]+			-1
1992	788.617	6.51032	293.404	PC(36:1)	[M+H]+					0.8
2002	826.574	6.51032	299.392	PC(36:1)	[M+K]+					1.8
1991	786.602	6.51032	289.654	PC(36:2)	[M+H]+	PC(o34:0)_[M+K]+				1.1
1925	806.57	6.40888	287.012	PC(36:3)	[M+Na]+	PC(38:6)_[M+H]+	PC(o36:4)_[M+K]+	PC(p36:3)_[M+K]+		3.1
2082	782.57	6.5639	290.936	PC(36:4)	[M+H]+	PC(34:1)_[M+Na]+	PC(o34:2)_[M+K]+			0
1923	802.533	6.40888	281.969	PC(36:5)	[M+Na]+	PC(o36:6)_[M+K]+	PC(38:8)_[M+H]+	PC(p36:5)_[M+K]+		-4.3
1971	814.627	6.4765	295.738	PC(38:2)	[M+H]+	PC(o36:0)_[M+K]+				-7.2
1928	810.601	6.40888	290.763	PC(38:4)	[M+H]+	PC(36:1)_[M+Na]+	PC(o36:2)_[M+K]+	PC(p36:1)_[M+K]+		-0.2
1927	808.585	6.40888	288.261	PC(38:5)	[M+H]+	PC(36:2)_[M+Na]+	PC(o36:3)_[M+K]+	PC(p36:2)_[M+K]+		-1.3
1934	828.552	6.40888	290.657	PC(38:6)	[M+Na]+	PC(40:9)_[M+H]+	PC(o38:7)_[M+K]+	PC(36:0)_[M+K]+		-0.4
1924	804.553	6.40888	287.024	PC(38:7)	[M+H]+	PC(36:4)_[M+Na]+	PC(o36:5)_[M+K]+	PC(p36:4)_[M+K]+		-1.7
1936	864.644	6.40888	301.647	PC(40:2)	[M+Na]+	PC(42:5)_[M+H]+	PC(o40:3)_[M+K]+	PC(p40:2)_[M+K]+		-1.7
1935	838.629	6.40888	298.083	PC(40:4)	[M+H]+	PC(38:1)_[M+Na]+	PC(o38:2)_[M+K]+	PC(p38:1)_[M+K]+		-4.9
1904	834.6	6.35528	293.126	PC(40:6)	[M+H]+	PC(38:3)_[M+Na]+	PC(o38:4)_[M+K]+	PC(p38:3)_[M+K]+		-1.4
1907	856.58	6.35528	296.741	PC(40:6)	[M+Na]+	PC(42:9)_[M+H]+	PC(o40:7)_[M+K]+	PC(38:0)_[M+K]+		-3.9
1903	832.584	6.35528	290.634	PC(40:7)	[M+H]+	PC(38:4)_[M+Na]+	PC(o38:5)_[M+K]+	PC(p38:4)_[M+K]+		-1.7
1902	830.565	6.35528	289.39	PC(40:8)	[M+H]+	PC(38:5)_[M+Na]+	PC(o38:6)_[M+K]+	PC(p38:5)_[M+K]+		-5.8
1909	862.628	6.35528	300.424	PC(42:6)	[M+H]+	PC(40:3)_[M+Na]+	PC(o40:4)_[M+K]+	PC(p40:3)_[M+K]+		-5.5
1894	860.611	6.32148	296.719	PC(42:7)	[M+H]+	PC(40:4)_[M+Na]+	PC(o40:5)_[M+K]+	PC(p40:4)_[M+K]+		-7.2
1862	882.585	6.25385	294.115	PC(44:10)	[M+H]+	PC(42:7)_[M+Na]+	PC(o42:8)_[M+K]+			-18.7
1855	878.574	6.20027	294.135	PC(44:12)	[M+H]+	PC(42:9)_[M+Na]+	PC(o42:10)_[M+K]+	PC(p42:9)_[M+K]+		4.2
2111	718.566	6.59785	282.524	PC(o32:1)	[M+H]+					-13.2
2123	746.602	6.59785	292.434	PC(o34:1)	[M+H]+					-6.2
1983	744.58	6.51032	284.881	PC(o34:2)	[M+H]+	PC(p34:1)_[M+H]+				-13.8
2122	740.578	6.59785	284.908	PC(o34:4)	[M+H]+	PC(o32:1)_[M+Na]+				24.5
1966	772.596	6.4765	285.96	PC(o36:2)	[M+H]+	PC(p36:1)_[M+H]+				-33.2
1965	768.583	6.4765	285.986	PC(o36:4)	[M+H]+	PC(o34:1)_[M+Na]+	PC(p34:0)_[M+Na]+			-10.5
2058	760.536	6.5639	287.303	PC(o36:8)	[M+H]+					10.7
1933	820.617	6.40888	294.456	PC(o38:3)	[M+Na]+	PC(o40:6)_[M+H]+	PC(p38:2)_[M+Na]+			-2.6
1684	595.429	5.47872	246.74	PE(24:1)	[M+NH4]+					33.9
1585	645.398	5.2363	246.31	PE(28:4)	[M+NH4]+					-40.8
1630	690.508	5.3237	267.252	PE(32:1)	[M+H]+					0.7
1631	712.49	5.3237	270.996	PE(32:1)	[M+Na]+	PE(34:4)_[M+H]+	PE(o32:2)_[M+K]+			0.8
1611	718.539	5.27012	272.249	PE(34:1)	[M+H]+					0.4
1616	756.49	5.27012	278.428	PE(34:1)	[M+K]+	PE(36:7)_[M+Na]+				-5.5
1610	716.524	5.27012	268.367	PE(34:2)	[M+H]+	PE(o32:0)_[M+K]+				0.8
1615	754.484	5.27012	270.711	PE(34:2)	[M+K]+					6.4
1564	714.503	5.20248	267.077	PE(34:3)	[M+H]+	PE(p32:0)_[M+K]+	PE(32:0)_[M+Na]+	PE(o32:1)_[M+K]+		-6.2
1591	746.565	5.2363	278.494	PE(36:1)	[M+H]+					-6
1590	744.555	5.2363	274.653	PE(36:2)	[M+H]+	PE(o34:0)_[M+K]+				0.7
1592	782.509	5.2363	282.091	PE(36:2)	[M+K]+	PE(38:8)_[M+Na]+	PE(40:11)_[M+H]+			-1
1524	740.523	5.16867	272.098	PE(36:4)	[M+H]+	PE(p34:1)_[M+K]+	PE(34:1)_[M+Na]+	PE(o34:2)_[M+K]+		-0.3
1531	778.479	5.16867	275.722	PE(36:4)	[M+K]+					-0.4
1589	738.504	5.2363	273.404	PE(36:5)	[M+H]+	PE(34:2)_[M+Na]+	PE(o34:3)_[M+K]+	PE(p34:2)_[M+K]+		-4
1454	768.555	5.11508	279.629	PE(38:4)	[M+H]+	PE(p36:1)_[M+K]+	PE(36:1)_[M+Na]+	PE(o36:2)_[M+K]+		0.3
1470	806.507	5.11508	287.012	PE(38:4)	[M+K]+	PE(40:10)_[M+Na]+				-3.8
1446	764.523	5.11508	274.523	PE(38:6)	[M+H]+	PE(36:3)_[M+Na]+	PE(p36:3)_[M+K]+	PE(o36:4)_[M+K]+		0.1
1467	802.477	5.11508	283.24	PE(38:6)	[M+K]+	PE(40:12)_[M+Na]+				-2.4
1461	786.505	5.11508	283.337	PE(38:6)	[M+Na]+	PE(40:9)_[M+H]+	PE(o38:7)_[M+K]+	PE(p38:6)_[M+K]+	PE(36:0)_[M+K]+	-0.5
1527	762.502	5.16867	278.389	PE(38:7)	[M+H]+	PE(36:4)_[M+Na]+	PE(o36:5)_[M+K]+	PE(p36:4)_[M+K]+		-6.8
1532	784.494	5.16867	276.969	PE(38:7)	[M+Na]+	PE(40:10)_[M+H]+	PE(o38:8)_[M+K]+			6.3
1526	760.485	5.16867	273.259	PE(38:8)	[M+H]+	PE(36:5)_[M+Na]+	PE(o36:6)_[M+K]+	PE(p36:5)_[M+K]+		-8.6
1465	796.579	5.11508	288.333	PE(40:4)	[M+H]+	PE(p38:1)_[M+K]+	PE(38:1)_[M+Na]+	PE(o38:2)_[M+K]+		-8.7
1392	792.552	5.08127	282.029	PE(40:6)	[M+H]+	PE(p38:3)_[M+K]+	PE(38:3)_[M+Na]+	PE(o38:4)_[M+K]+		-2.5
1409	830.507	5.08127	290.646	PE(40:6)	[M+K]+					-3.4
1404	814.535	5.08127	289.483	PE(40:6)	[M+Na]+	PE(42:9)_[M+H]+	PE(o40:7)_[M+K]+	PE(p40:6)_[M+K]+		-1.3
1388	790.537	5.08127	285.846	PE(40:7)	[M+H]+	PE(38:4)_[M+Na]+	PE(o38:5)_[M+K]+	PE(p38:4)_[M+K]+		-2
1408	828.492	5.08127	288.145	PE(40:7)	[M+K]+					-3.1
1402	812.517	5.08127	286.977	PE(40:7)	[M+Na]+	PE(42:10)_[M+H]+	PE(o40:8)_[M+K]+	PE(p40:7)_[M+K]+	PE(38:1)_[M+K]+	-4.1
1476	826.475	5.11508	283.101	PE(40:8)	[M+K]+					-5.1
1475	824.467	5.11508	283.112	PE(40:9)	[M+K]+					4.2
1472	808.493	5.11508	281.934	PE(40:9)	[M+Na]+	PE(42:12)_[M+H]+	PE(o40:10)_[M+K]+	PE(38:3)_[M+K]+		4
1361	850.473	5.04745	286.763	PE(42:10)	[M+K]+					-6.9
1356	834.508	5.04745	285.588	PE(42:10)	[M+Na]+	PE(o42:11)_[M+K]+				3.2
1360	848.478	5.04745	284.247	PE(42:11)	[M+K]+					17.2
1407	822.59	5.08127	293.196	PE(42:5)	[M+H]+	PE(p40:2)_[M+K]+	PE(o40:3)_[M+K]+	PE(40:2)_[M+Na]+		-13.6
1411	852.491	5.08127	290.524	PE(42:9)	[M+K]+					-4.7
1281	840.55	4.96005	286.817	PE(44:10)	[M+H]+	PE(p42:7)_[M+K]+	PE(42:7)_[M+Na]+	PE(o42:8)_[M+K]+		-5.5
1286	878.496	4.96005	291.639	PE(44:10)	[M+K]+					-15.9
1284	862.53	4.96005	291.722	PE(44:10)	[M+Na]+	PE(o44:11)_[M+K]+	PE(p44:10)_[M+K]+			-6.8
1357	836.517	5.04745	289.357	PE(44:12)	[M+H]+	PE(42:9)_[M+Na]+	PE(o42:10)_[M+K]+	PE(40:3)_[M+K]+		-7.7
1359	844.578	5.04745	298.049	PE(44:8)	[M+H]+	PE(o42:6)_[M+K]+	PE(42:5)_[M+Na]+	PE(p42:5)_[M+K]+		-8.4
1586	674.504	5.2363	271.285	PE(o32:2)	[M+H]+	PE(p32:1)_[M+H]+				-13
1562	702.543	5.20248	277.526	PE(o34:2)	[M+H]+	PE(p34:1)_[M+H]+				-0.7
1521	728.559	5.16867	276.05	PE(o36:3)	[M+H]+	PE(p36:2)_[M+H]+	PE(o34:0)_[M+Na]+			-0.1
1403	812.615	5.08127	288.237	PE(o40:0)	[M+Na]+	PE(p42:2)_[M+H]+				-44.8
1323	770.512	5.01365	279.616	PE(o40:10)	[M+H]+	PE(p38:6)_[M+Na]+	PE(p40:9)_[M+H]+	PE(o38:7)_[M+Na]+	PE(p36:0)_[M+K]+	-1.2
1474	818.562	5.11508	294.468	PE(o40:5)	[M+K]+	PE(42:7)_[M+H]+	PE(40:4)_[M+Na]+	PE(p40:4)_[M+K]+		18.9
1271	798.543	4.96005	287.06	PE(o42:10)	[M+H]+	PE(p40:6)_[M+Na]+	PE(p42:9)_[M+H]+	PE(p38:0)_[M+K]+	PE(o40:7)_[M+Na]+	-0.9
1277	820.524	4.96005	284.402	PE(o42:10)	[M+Na]+	PE(p42:9)_[M+Na]+	PE(p40:3)_[M+K]+			-1.8
1276	818.512	4.96005	280.604	PE(o42:11)	[M+Na]+	PE(p42:10)_[M+Na]+				2.6
1410	850.601	5.08127	300.49	PE(o42:3)	[M+K]+	PE(p42:2)_[M+K]+	PE(44:5)_[M+H]+	PE(o46:12)_[M+H]+	PE(42:2)_[M+Na]+	-10.1
1331	802.571	5.01365	290.811	PE(o42:8)	[M+H]+	PE(p40:4)_[M+Na]+	PE(p42:7)_[M+H]+	PE(o40:5)_[M+Na]+		-5.3
1278	826.58	4.96005	293.173	PE(o44:10)	[M+H]+	PE(p42:6)_[M+Na]+	PE(p44:9)_[M+H]+	PE(p40:0)_[M+K]+	PE(o42:7)_[M+Na]+	6.1
1279	828.587	4.96005	295.655	PE(o44:9)	[M+H]+	PE(p42:5)_[M+Na]+	PE(p44:8)_[M+H]+	PE(o42:6)_[M+Na]+		-4.4
1285	877.663	4.96005	306.49	PE(o46:7)	[M+NH4]+	PE(p46:6)_[M+NH4]+				-19.7
1557	534.355	5.20248	229.381	PE(p22:1)	[M+H]+					-1.4
1258	601.383	4.96005	242.596	PE(p26:4)	[M+NH4]+					-25.9
1346	724.529	5.04745	276.079	PE(p34:1)	[M+Na]+	PE(p36:4)_[M+H]+	PE(o36:5)_[M+H]+			4.5
1520	700.529	5.16867	273.675	PE(p34:2)	[M+H]+	PE(o34:3)_[M+H]+	PE(o32:0)_[M+Na]+			2
1319	752.562	5.01365	284.826	PE(p36:1)	[M+Na]+	PE(p38:4)_[M+H]+	PE(o38:5)_[M+H]+			6.7
1313	748.53	5.01365	277.199	PE(p36:3)	[M+Na]+	PE(p38:6)_[M+H]+	PE(o38:7)_[M+H]+			5.2
1349	746.512	5.04745	275.927	PE(p36:4)	[M+Na]+	PE(o38:8)_[M+H]+	PE(p38:7)_[M+H]+	PE(o36:5)_[M+Na]+		2.1
1325	780.588	5.01365	289.693	PE(p38:1)	[M+Na]+	PE(p40:4)_[M+H]+	PE(o40:5)_[M+H]+			-0.7
1264	776.559	4.96005	282.128	PE(p38:3)	[M+Na]+	PE(p40:6)_[M+H]+	PE(o40:7)_[M+H]+			2.6
1262	774.544	4.96005	279.591	PE(p38:4)	[M+Na]+	PE(p40:7)_[M+H]+	PE(o40:8)_[M+H]+			3.1
1329	786.482	5.01365	278.238	PE(p38:6)	[M+K]+	PE(40:9)_[M+H]+	PE(o38:7)_[M+K]+	PE(38:6)_[M+Na]+		-2.1
1274	806.599	4.96005	293.292	PE(p40:2)	[M+Na]+	PE(p42:5)_[M+H]+	PE(o42:6)_[M+H]+			-5.6
1273	804.587	4.96005	290.799	PE(p40:3)	[M+Na]+	PE(p42:6)_[M+H]+	PE(o42:7)_[M+H]+			-1.1
1275	814.513	4.96005	284.437	PE(p40:6)	[M+K]+	PE(42:9)_[M+H]+	PE(o40:7)_[M+K]+	PE(40:6)_[M+Na]+		-3.2
1270	796.527	4.96005	283.275	PE(p40:7)	[M+Na]+	PE(o42:11)_[M+H]+	PE(p42:10)_[M+H]+	PE(o40:8)_[M+Na]+	PE(p38:1)_[M+K]+	1.6
1280	834.598	4.96005	288.11	PE(p42:2)	[M+Na]+					-44.1
1175	986.659	4.58238	308.406	PE(p54:10)	[M+Na]+					-39.8
699	787.49	1.85953	282.06	PG(34:1)	[M+K]+	PG(36:7)_[M+Na]+				1.2
698	771.515	1.85953	279.61	PG(34:1)	[M+Na]+	PG(o34:2)_[M+K]+	PG(36:4)_[M+H]+			0
685	769.5	1.82572	275.778	PG(34:2)	[M+Na]+	PG(o34:3)_[M+K]+				0.7
658	783.451	1.6707	274.406	PG(34:3)	[M+K]+					-9
680	799.544	1.7919	285.791	PG(36:1)	[M+Na]+	PG(o36:2)_[M+K]+	PG(38:4)_[M+H]+			-3.4
726	642.497	2.06815	259.739	PG(o26:0)	[M+NH4]+					40.9
596	843.636	1.36063	298.054	PG(p42:2)	[M+H]+					-14.6
599	903.569	1.36063	301.443	PG(p46:11)	[M+Na]+	PG(p44:5)_[M+K]+	PG(o46:12)_[M+Na]+			19.4
983	887.562	3.46338	295.334	PI(36:1)	[M+Na]+	PI(o36:2)_[M+K]+	PI(p36:1)_[M+K]+	PI(38:4)_[M+H]+		-0.6
1023	897.486	3.531	292.793	PI(36:4)	[M+K]+					-3.3
1022	881.517	3.531	291.623	PI(36:4)	[M+Na]+	PI(o36:5)_[M+K]+	PI(38:7)_[M+H]+			1.4
988	913.579	3.46338	298.925	PI(38:2)	[M+Na]+	PI(o38:3)_[M+K]+				0.7
991	925.515	3.46338	298.867	PI(38:4)	[M+K]+	PI(40:10)_[M+Na]+				-5.7
987	909.547	3.46338	298.944	PI(38:4)	[M+Na]+	PI(o38:5)_[M+K]+	PI(40:7)_[M+H]+			-0.2
985	907.531	3.46338	295.235	PI(38:5)	[M+Na]+	PI(o38:6)_[M+K]+	PI(40:8)_[M+H]+			-0.7
994	935.56	3.46338	301.288	PI(40:5)	[M+Na]+	PI(o40:6)_[M+K]+	PI(42:8)_[M+H]+			-3
997	947.506	3.46338	302.463	PI(40:7)	[M+K]+					0.3
993	931.528	3.46338	300.074	PI(40:7)	[M+Na]+	PI(o40:8)_[M+K]+	PI(42:10)_[M+H]+			-3.8
992	929.515	3.46338	295.13	PI(40:8)	[M+Na]+	PI(42:11)_[M+H]+				-1.1
998	957.538	3.46338	302.417	PI(42:8)	[M+Na]+	PI(o42:9)_[M+K]+				-9.4
984	893.574	3.46338	296.546	PI(o38:5)	[M+Na]+	PI(o40:8)_[M+H]+				24.4
1009	947.585	3.49718	298.765	PI(o42:6)	[M+Na]+					-15.1
986	907.619	3.46338	301.423	PI(p40:0)	[M+H]+					-49.3
1843	812.541	6.13263	284.448	PS(36:1)	[M+Na]+	PC(p38:6)_[M+Na]+	PS(38:4)_[M+H]+	PS(o36:2)_[M+K]+		-0.8
1823	836.546	5.97762	286.839	PS(40:6)	[M+H]+	PS(38:3)_[M+Na]+	PC(p40:8)_[M+Na]+	PS(o38:4)_[M+K]+	PS(p38:3)_[M+K]+	2.2
1812	882.523	5.9438	287.856	PS(44:11)	[M+H]+	PS(42:8)_[M+Na]+	PS(o42:9)_[M+K]+			-5.7
1790	1100.75	5.78877	328.352	PS(56:5)	[M+K]+					-15.8
1716	1056.72	5.54635	322.581	PS(p54:5)	[M+K]+	PS(o56:12)_[M+Na]+	PS(56:8)_[M+H]+	PS(p56:11)_[M+Na]+	PS(o54:6)_[M+K]+	-17.7
62	476.41	0.430333	228.662	Cer(d30:4)	[M+H]+					-0.6
70	506.457	0.430333	238.084	Cer(d32:3)	[M+H]+					-0.1
68	502.43	0.430333	235.351	Cer(d32:5)	[M+H]+	DG(26:0)_[M+NH4]+				7.2
272	540.535	0.46415	255.414	Cer(d34:0)	[M+H]+
267	520.511	0.46415	252.962	Cer(d34:1)	[M+H-H2O]+					2.2
74	528.447	0.430333	244.71	Cer(d34:6)	[M+H]+	DG(28:1)_[M+NH4]+	Cer(d32:3)_[M+Na]+			9.3
282	568.563	0.46415	263.096	Cer(d36:0)	[M+H]+
281	566.551	0.46415	261.793	Cer(d36:1)	[M+H]+					-0.5
276	548.543	0.46415	258.001	Cer(d36:1)	[M+H-H2O]+					3.6
275	546.525	0.46415	255.345	Cer(d36:2)	[M+H-H2O]+					0.4
279	560.503	0.46415	251.151	Cer(d36:4)	[M+H]+					-2.5
289	596.595	0.46415	268.071	Cer(d38:0)	[M+H]+
284	576.572	0.46415	265.651	Cer(d38:1)	[M+H-H2O]+					-0.4
283	574.553	0.46415	263.032	Cer(d38:2)	[M+H-H2O]+					-5.2
287	588.534	0.46415	257.574	Cer(d38:4)	[M+H]+					-2.4
286	586.518	0.46415	252.234	Cer(d38:5)	[M+H]+	DG(32:0)_[M+NH4]+				-3.9
297	624.619	0.46415	274.313	Cer(d40:0)	[M+H]+
291	604.602	0.46415	271.909	Cer(d40:1)	[M+H-H2O]+					-2.2
290	602.587	0.46415	268.011	Cer(d40:2)	[M+H-H2O]+					-1.7
92	612.535	0.430333	258.676	Cer(d40:6)	[M+H]+	Cer(d38:3)_[M+Na]+	DG(34:1)_[M+NH4]+			-1.1
302	650.622	0.46415	277.95	Cer(d42:1)	[M+H]+					-36.1
299	630.62	0.46415	274.257	Cer(d42:2)	[M+H-H2O]+					1.7
301	646.615	0.46415	272.817	Cer(d42:3)	[M+H]+					2
298	628.603	0.46415	271.679	Cer(d42:3)	[M+H-H2O]+					-0.8
405	682.564	0.672767	275.105	HexCer(d34:1)	[M+H-H2O]+					2.4
412	738.532	0.672767	278.549	HexCer(d34:1)	[M+K]+					4
411	728.601	0.672767	283.724	HexCer(d36:1)	[M+H]+					-3.6
408	710.595	0.672767	281.308	HexCer(d36:1)	[M+H-H2O]+					2.7
406	708.578	0.672767	278.764	HexCer(d36:2)	[M+H-H2O]+					0
444	742.537	0.7742	268.19	HexCer(d36:5)	[M+Na]+					18
413	738.624	0.672767	287.455	HexCer(d38:1)	[M+H-H2O]+					-0.7
415	750.586	0.672767	283.57	HexCer(d38:4)	[M+H]+	HexCer(d36:1)_[M+Na]+				-3.6
418	784.661	0.672767	294.679	HexCer(d40:1)	[M+H]+					-6.8
417	766.66	0.672767	293.548	HexCer(d40:1)	[M+H-H2O]+					4.8
420	806.64	0.672767	294.54	HexCer(d40:1)	[M+Na]+	HexCer(d42:4)_[M+H]+				-10.8
416	764.64	0.672767	289.797	HexCer(d40:2)	[M+H-H2O]+					-1.2
421	810.657	0.672767	295.762	HexCer(d42:2)	[M+H]+	HexCer(d44:7)_[M+H-H2O]+				-31.4
419	792.675	0.672767	295.874	HexCer(d42:2)	[M+H-H2O]+					3.6
2276	703.576	7.33917	281.361	SM(d34:1)	[M+H]+					0.3
2268	731.606	7.28558	286.24	SM(d36:1)	[M+H]+					-1.5
2263	729.59	7.25177	282.444	SM(d36:2)	[M+H]+					-1
2264	757.629	7.25177	289.845	SM(d38:2)	[M+H]+					8.9
2253	813.681	7.21797	300.708	SM(d42:2)	[M+H]+					-4.3
2249	811.664	7.18415	298.243	SM(d42:3)	[M+H]+					-6.5

## Sheet: Negative ID Lipids
Compound	m/z	rt	ccs	Lipid	Adduct	Alternative ID		m/z error	Red Text = Manual ID
	(Da)	(min)	(Å²)					(ppm)
789	253.234	0.706583	170.863	FA(16:1)	[M-H]-
698	281.265	0.672767	178.153	FA(18:1)	[M-H]-
696	279.248	0.672767	176.6	FA(18:2)	[M-H]-
805	277.229	0.706583	176.658	FA(18:3)	[M-H]-
712	309.293	0.672767	185.323	FA(20:1)	[M-H]-
711	307.276	0.672767	185.373	FA(20:2)	[M-H]-
710	305.26	0.672767	185.425	FA(20:3)	[M-H]-
707	303.247	0.672767	183.91	FA(20:4)	[M-H]-
716	337.322	0.672767	192.373	FA(22:1)	[M-H]-
715	331.275	0.672767	190.982	FA(22:4)	[M-H]-
713	327.243	0.672767	191.074	FA(22:6)	[M-H]-
294	477.381	0.51775	227.299	DG(26:3)	[M-H]-			47.7
292	471.333	0.51775	216.346	DG(26:6)	[M-H]-			45.9
128	505.403	0.464167	226.949	DG(28:3)	[M-H]-			27.8
325	589.392	0.51775	253.576	DG(30:5)	[M+CH3COO]-			-31.5
320	565.481	0.51775	240.943	DG(32:1)	[M-H]-			-3.2
491	559.435	0.585367	238.382	DG(32:4)	[M-H]-			-1.8
333	617.418	0.51775	260.85	DG(32:5)	[M+CH3COO]-			-37.8
29	645.458	0.43035	258.108	DG(34:5)	[M+CH3COO]-			-22.7
174	673.479	0.464167	261.621	DG(36:5)	[M+CH3COO]-			-37.7
33	671.48	0.43035	260.394	DG(36:6)	[M+CH3COO]-			-13.3
199	759.608	0.464167	281.61	DG(42:4)	[M+CH3COO]-			-7.3
183	699.59	0.464167	263.897	DG(42:4)	[M-H]-			-3.5
3474	475.207	5.23618	202.044	CL(36:4)	[M-2H]2-
3604	471.186	5.39122	200.636	CL(36:8)	[M-2H]2-
3475	487.236	5.23618	206.236	CL(38:6)	[M-2H]2-
3663	503.278	5.42503	148.221	CL(40:4)	[M-2H]2-
4008	501.227	5.63363	211.771	CL(40:6)	[M-2H]2-
3256	518.284	5.04735	225.442	CL(42:3)	[M-2H]2-
3540	518.272	5.32358	149.827	CL(42:3)	[M-2H]2-
3606	529.266	5.39122	151.455	CL(44:6)	[M-2H]2-
3167	544.302	4.95995	230.568	CL(46:5)	[M-2H]2-
2940	591.263	4.7711	228.778	CL(54:14)	[M-2H]2-
2901	588.238	4.7373	154.448	CL(54:17)	[M-2H]2-
3260	653.377	5.04735	244.067	CL(62:8)	[M-2H]2-
3578	675.502	5.3574	257.87	CL(64:0)	[M-2H]2-
2945	699.464	4.7711	205.949	CL(68:4)	[M-2H]2-
4802	554.346	7.80402	238.434	LPC(16:0)	[M+CH3COO]-			0.4
4806	552.326	7.83782	235.816	LPC(16:1)	[M+CH3COO]-			-7
4796	582.374	7.71662	244.678	LPC(18:0)	[M+CH3COO]-			-4.9
4797	580.358	7.75042	242.101	LPC(18:1)	[M+CH3COO]-			-5.1
4284	480.313	6.44258	214.832	LPE(18:0)	[M-H]-			7.9
4172	500.281	6.25375	213.191	LPE(20:4)	[M-H]-			6.3
4168	524.28	6.20017	217.125	LPE(22:6)	[M-H]-			4.1
4457	466.322	6.59762	212.19	LPE(o18:0)	[M-H]-			-15.8
4171	464.316	6.25375	213.629	LPE(p18:0)	[M-H]-			3.5
2319	453.207	3.40968	202.317	LPG(14:1)	[M-H]-			-40.1
2284	563.316	3.37587	229.035	LPG(22:2)	[M-H]-			-33.9
2357	515.301	3.49708	218.609	LPG(o20:5)	[M-H]-			45.3
2241	513.244	3.25465	213.049	LPG(o20:6)	[M-H]-			-34.7
2257	553.374	3.30823	233.149	LPG(o22:0)	[M-H]-			-23.3
2243	545.326	3.25465	223.793	LPG(o22:4)	[M-H]-			3.5
2261	637.406	3.30823	246.768	LPG(o24:2)	[M+CH3COO]-			-3.4
4196	589.385	6.28757	240.712	PA(28:1)	[M-H]-			-4
4206	647.386	6.28757	259.342	PA(28:2)	[M+CH3COO]-			-9.7
4207	671.366	6.28757	255.394	PA(30:4)	[M+CH3COO]-			-39.1
4210	747.411	6.28757	272.113	PA(36:8)	[M+CH3COO]-			-16.5
4182	687.39	6.25375	260.274	PA(36:8)	[M-H]-			-18.1
4193	575.415	6.28757	235.587	PA(o28:1)	[M-H]-			12.3
4179	657.414	6.25375	261.748	PA(o30:4)	[M+CH3COO]-	PA(p30:3)_[M+CH3COO]-		1
4610	736.498	6.71883	277	PC(28:0)	[M+CH3COO]-			-20.6
4571	764.528	6.66525	281.578	PC(30:0)	[M+CH3COO]-	PC(o36:5)_[M-H]-		-21.8
4524	762.511	6.63143	279.214	PC(30:1)	[M+CH3COO]-			-22.4
4527	792.555	6.63143	287.29	PC(32:0)	[M+CH3COO]-			-25.8
4480	790.541	6.59762	286.13	PC(32:1)	[M+CH3COO]-			-24.2
4490	818.569	6.59762	290.633	PC(34:1)	[M+CH3COO]-	PC(o36:8)_[M+CH3COO]-		-26.4
4421	816.553	6.5638	290.645	PC(34:2)	[M+CH3COO]-			-27.4
4377	814.535	6.51022	289.493	PC(34:3)	[M+CH3COO]-			-29.9
4380	844.581	6.51022	297.409	PC(36:2)	[M+CH3COO]-	PC(o38:9)_[M+CH3COO]-		-30.3
4326	840.551	6.4764	293.981	PC(36:4)	[M+CH3COO]-			-29.2
4295	838.533	6.44258	291.679	PC(36:5)	[M+CH3COO]-			-31.5
4299	868.579	6.44258	299.563	PC(38:4)	[M+CH3COO]-			-32
4264	866.563	6.40878	298.432	PC(38:5)	[M+CH3COO]-			-32.9
4263	864.549	6.40878	297.298	PC(38:6)	[M+CH3COO]-			-31
4262	862.532	6.40878	295.012	PC(38:7)	[M+CH3COO]-			-32.7
4238	892.576	6.35518	303.98	PC(40:6)	[M+CH3COO]-			-34.1
4237	890.562	6.35518	301.724	PC(40:7)	[M+CH3COO]-			-32.6
4236	888.542	6.35518	299.458	PC(40:8)	[M+CH3COO]-			-37.6
4245	920.593	6.35518	309.461	PC(42:6)	[M+CH3COO]-			-49.2
4242	918.581	6.35518	308.351	PC(42:7)	[M+CH3COO]-			-45.5
4226	916.565	6.32138	306.115	PC(42:8)	[M+CH3COO]-			-46
4188	936.531	6.25375	307.142	PC(44:12)	[M+CH3COO]-			-47.9
4602	662.466	6.71883	254.203	PC(o24:2)	[M+CH3COO]-			39.5
4560	690.497	6.66525	259.006	PC(o26:2)	[M+CH3COO]-			37.4
4515	688.48	6.63143	257.773	PC(o26:3)	[M+CH3COO]-	PC(p26:2)_[M+CH3COO]-		36.1
4558	686.42	6.66525	256.537	PC(o26:4)	[M+CH3COO]-			-29.1
4566	720.529	6.66525	264.98	PC(o28:1)	[M+CH3COO]-			15.7
4470	716.511	6.59762	263.777	PC(o28:3)	[M+CH3COO]-	PC(p28:2)_[M+CH3COO]-		33.4
4474	744.539	6.59762	269.707	PC(o30:3)	[M+CH3COO]-	PC(p30:2)_[M+CH3COO]-		28.8
4568	740.486	6.66525	278.168	PC(o30:5)	[M+CH3COO]-			-0.6
4375	770.549	6.51022	274.376	PC(o32:4)	[M+CH3COO]-	PC(p32:3)_[M+CH3COO]-		20.1
4489	818.517	6.59762	292.953	PC(o36:8)	[M+CH3COO]-			-20.9
4588	854.587	6.66525	295.055	PC(o38:4)	[M+CH3COO]-			-46.9
4434	852.625	6.5638	303.064	PC(o38:5)	[M+CH3COO]-			15.4
4301	922.552	6.44258	311.684	PC(o44:12)	[M+CH3COO]-			-47.9
4374	740.504	6.51022	267.296	PC(p30:4)	[M+CH3COO]-	PC(o30:5)_[M+CH3COO]-		23.8
4233	818.547	6.35518	283.611	PC(p36:7)	[M+CH3COO]-	PC(o36:8)_[M+CH3COO]-		16.2
4232	816.531	6.35518	281.261	PC(p36:8)	[M+CH3COO]-			16.1
4009	518.287	5.63363	217.189	PE(20:2)	[M-H]-	CL(42:3)_[M-2H]2-		-2.6
3577	660.45	5.3574	251.689	PE(30:1)	[M-H]-	CL(62:1)_[M-2H]2-		-16.4
3482	714.417	5.23618	262.558	PE(30:4)	[M+CH3COO]-			-24.8
3546	688.481	5.32358	257.773	PE(32:1)	[M-H]-			-15
3545	686.464	5.32358	256.536	PE(32:2)	[M-H]-			-17.1
3619	744.457	5.39122	269.707	PE(32:3)	[M+CH3COO]-			-32.4
3550	716.511	5.32358	265.008	PE(34:1)	[M-H]-			-17.4
3511	714.495	5.27	262.558	PE(34:2)	[M-H]-			-17.4
3481	712.478	5.23618	260.094	PE(34:3)	[M-H]-			-18.6
3455	710.464	5.20237	258.864	PE(34:4)	[M-H]-			-16.9
3366	766.466	5.11497	274.402	PE(34:6)	[M+CH3COO]-			0.1
3514	744.538	5.27	270.921	PE(36:1)	[M-H]-			-22
3483	742.524	5.23618	268.503	PE(36:2)	[M-H]-			-19.8
3429	738.493	5.16857	266.086	PE(36:4)	[M-H]-			-19
3428	736.478	5.16857	263.643	PE(36:5)	[M-H]-			-19.2
3427	734.462	5.16857	262.423	PE(36:6)	[M-H]-			-19.5
3301	790.463	5.08117	279.039	PE(36:8)	[M+CH3COO]-			-3.1
3367	766.522	5.11497	273.197	PE(38:4)	[M-H]-			-22.3
3363	764.505	5.11497	270.792	PE(38:5)	[M-H]-			-23.6
3358	762.491	5.11497	270.805	PE(38:6)	[M-H]-			-21.5
3432	820.498	5.16857	288.292	PE(38:7)	[M+CH3COO]-	PE(o44:12)_[M-H]-		-18.6
3355	760.476	5.11497	265.946	PE(38:7)	[M-H]-			-20.2
3378	842.474	5.11497	290.497	PE(40:10)	[M+CH3COO]-			-27.6
3375	794.548	5.11497	281.39	PE(40:4)	[M-H]-	PE(o42:11)_[M-H]-		-27.8
3302	790.516	5.08117	276.653	PE(40:6)	[M-H]-			-28.3
3299	788.504	5.08117	275.467	PE(40:7)	[M-H]-			-23.9
3297	786.487	5.08117	274.278	PE(40:8)	[M-H]-			-25.5
3379	844.485	5.11497	292.804	PE(40:9)	[M+CH3COO]-			-33.3
3194	810.484	4.95995	277.73	PE(42:10)	[M-H]-			-28.6
3311	820.562	5.08117	288.292	PE(42:5)	[M-H]-	PE(o44:12)_[M-H]-	PE(o44:12)_[M-H]-	-29.4
3310	818.545	5.08117	285.963	PE(42:6)	[M-H]-			-30.1
3278	816.53	5.04735	283.623	PE(42:7)	[M-H]-			-29.8
3227	814.514	5.01353	281.272	PE(42:8)	[M-H]-			-30.6
3313	872.513	5.08117	298.4	PE(42:9)	[M+CH3COO]-			-36.2
3195	838.513	4.95995	284.676	PE(44:10)	[M-H]-			-30.4
3157	834.484	4.92613	281.16	PE(44:12)	[M-H]-			-28.2
3196	842.537	4.95995	286.999	PE(44:8)	[M-H]-	PE(40:10)_[M+CH3COO]-		-39.5
3117	864.522	4.89232	289.215	PE(46:11)	[M-H]-			-37
3544	646.466	5.32358	253.067	PE(o30:1)	[M-H]-	PE(p30:0)_[M-H]-		-23.1
3510	700.439	5.27	261.419	PE(o30:4)	[M+CH3COO]-	PE(p30:3)_[M+CH3COO]-		-22.6
3512	732.527	5.27	268.57	PE(o32:2)	[M+CH3COO]-	PE(p32:1)_[M+CH3COO]-		11.9
3557	756.507	5.32358	278.061	PE(o34:4)	[M+CH3COO]-			-13.9
3487	782.518	5.23618	286.181	PE(o36:5)	[M+CH3COO]-	PE(p36:4)_[M+CH3COO]-		-20.2
3549	716.463	5.32358	263.778	PE(o36:8)	[M-H]-	PE(30:3)_[M+CH3COO]-		-3.2
3309	806.539	5.08117	287.205	PE(o38:7)	[M+CH3COO]-	PE(p38:6)_[M+CH3COO]-		7.2
3516	802.494	5.27	286.057	PE(o38:9)	[M+CH3COO]-			-10.7
3228	828.493	5.01353	291.736	PE(o40:10)	[M+CH3COO]-	PE(p40:9)_[M+CH3COO]-		-30
3279	832.518	5.04735	294.027	PE(o40:8)	[M+CH3COO]-	PE(p40:7)_[M+CH3COO]-		-37.2
3198	856.52	4.95995	296.195	PE(o42:10)	[M+CH3COO]-	PE(p42:9)_[M+CH3COO]-		-34.3
3197	854.504	4.95995	295.056	PE(o42:11)	[M+CH3COO]-	PE(p42:10)_[M+CH3COO]-		-34.5
3229	860.54	5.01353	298.465	PE(o42:8)	[M+CH3COO]-	PE(p42:7)_[M+CH3COO]-		-47.5
3480	672.487	5.23618	256.641	PE(p32:1)	[M-H]-	PE(o32:2)_[M-H]-		-15.1
3349	726.455	5.11497	266.167	PE(p32:4)	[M+CH3COO]-	PE(o32:5)_[M+CH3COO]-		-22.4
3348	722.42	5.11497	266.194	PE(p32:6)	[M+CH3COO]-			-27.3
3452	700.517	5.20237	262.656	PE(p34:1)	[M-H]-	PE(o34:2)_[M-H]-		-16.3
3451	698.5	5.20237	261.433	PE(p34:2)	[M-H]-	PE(o34:3)_[M-H]-		-18.6
3352	752.461	5.11497	272.08	PE(p34:5)	[M+CH3COO]-	PE(o34:6)_[M+CH3COO]-		-33.5
3351	750.446	5.11497	270.882	PE(p34:6)	[M+CH3COO]-			-33.6
3303	790.576	5.08117	279.039	PE(p36:0)	[M+CH3COO]-	PE(40:6)_[M-H]-		-26
3425	726.527	5.16857	267.39	PE(p36:2)	[M-H]-	PE(o36:3)_[M-H]-		-23
3267	722.5	5.04735	266.194	PE(p36:4)	[M-H]-			-17.1
3265	720.482	5.04735	263.75	PE(p36:5)	[M-H]-	PE(o36:6)_[M-H]-		-20.8
3225	778.47	5.01353	276.726	PE(p36:6)	[M+CH3COO]-			-41.2
3180	774.473	4.95995	276.751	PE(p36:8)	[M+CH3COO]-			2.1
3272	750.528	5.04735	270.882	PE(p38:4)	[M-H]-	PE(o38:5)_[M-H]-		-20.9
3271	746.499	5.04735	270.908	PE(p38:6)	[M-H]-	PE(o38:7)_[M-H]-		-17.8
3216	744.485	5.01353	267.27	PE(p38:7)	[M-H]-	PE(o38:8)_[M-H]-		-16.4
3274	778.554	5.04735	280.302	PE(p40:4)	[M-H]-	PE(o40:5)_[M-H]-		-27
3181	774.526	4.95995	276.75	PE(p40:6)	[M-H]-			-23.6
3177	772.511	4.95995	275.565	PE(p40:7)	[M-H]-	PE(o40:8)_[M-H]-		-22.1
3174	770.494	4.95995	271.965	PE(p40:8)	[M-H]-	PE(o40:9)_[M-H]-		-23.5
3193	804.565	4.95995	284.87	PE(p42:5)	[M-H]-	PE(o42:6)_[M-H]-		-32.3
3192	802.553	4.95995	283.705	PE(p42:6)	[M-H]-	PE(o42:7)_[M-H]-		-27.4
3191	800.536	4.95995	282.537	PE(p42:7)	[M-H]-	PE(o42:8)_[M-H]-		-29.3
1532	519.237	1.79178	212.985	PG(18:3)	[M-H]-			2.2
1655	547.289	2.01443	223.774	PG(20:3)	[M-H]-			40
1683	605.344	2.06802	239.262	PG(24:2)	[M-H]-			-2.9
1663	661.368	2.01443	252.949	PG(24:4)	[M+CH3COO]-			49.4
1517	635.368	1.75797	240.317	PG(26:1)	[M-H]-			-38
1684	633.374	2.06802	242.932	PG(26:2)	[M-H]-			-4.4
1500	689.36	1.70438	255.26	PG(26:4)	[M+CH3COO]-			-9
1537	663.457	1.79178	255.455	PG(28:1)	[M-H]-			49.5
1611	655.346	1.91298	245.341	PG(28:5)	[M-H]-			-23.8
1642	653.334	1.98062	242.775	PG(28:6)	[M-H]-			-18.4
1623	693.454	1.9468	261.47	PG(30:0)	[M-H]-			-24
1621	691.431	1.9468	258.999	PG(30:1)	[M-H]-			-34.3
1572	747.448	1.8256	272.112	PG(30:3)	[M+CH3COO]-	PG(o36:8)_[M-H]-		4.1
1542	745.4	1.79178	268.484	PG(30:4)	[M+CH3COO]-			-38.5
1612	721.485	1.91298	267.425	PG(32:0)	[M-H]-			-24.2
1599	719.472	1.8594	264.987	PG(32:1)	[M-H]-			-20.1
1598	717.463	1.8594	262.537	PG(32:2)	[M-H]-			-11.1
1505	775.45	1.70438	275.547	PG(32:3)	[M+CH3COO]-			-33.2
1521	709.416	1.75797	260.115	PG(32:6)	[M-H]-			11.7
1573	747.502	1.8256	270.901	PG(34:1)	[M-H]-			-21
1543	745.486	1.79178	269.701	PG(34:2)	[M-H]-			-21.5
1545	775.527	1.79178	279.131	PG(36:1)	[M-H]-	PG(o38:8)_[M-H]-		-28.2
1483	769.487	1.67057	274.383	PG(36:4)	[M-H]-			-19.2
1482	767.484	1.67057	271.984	PG(36:5)	[M-H]-			-2.9
1467	797.513	1.63675	280.186	PG(38:4)	[M-H]-			-25.8
1450	795.499	1.60293	279.009	PG(38:5)	[M-H]-			-23.6
1466	793.485	1.63675	277.829	PG(38:6)	[M-H]-			-21
1434	813.473	1.54935	284.818	PG(40:10)	[M-H]-			3.4
1469	829.572	1.63675	289.406	PG(40:2)	[M-H]-	PG(o42:9)_[M-H]-		-28.3
1485	827.552	1.67057	287.083	PG(40:3)	[M-H]-	PG(o42:10)_[M-H]-		-34.1
1487	907.588	1.67057	302.772	PG(42:7)	[M+CH3COO]-			20.2
1694	507.264	2.10183	221.46	PG(o18:2)	[M-H]-			-16.9
1606	539.352	1.91298	227.927	PG(o20:0)	[M-H]-			32.3
1681	591.365	2.06802	240.694	PG(o24:2)	[M-H]-			-2.8
1657	585.325	2.01443	236.815	PG(o24:5)	[M-H]-			10.1
1641	623.434	1.98062	249.446	PG(o26:0)	[M-H]-			7.8
1565	615.368	1.8256	243.082	PG(o26:4)	[M-H]-			3.5
1686	651.454	2.06802	251.76	PG(o28:0)	[M-H]-			-9.1
1570	679.469	1.8256	257.84	PG(o30:0)	[M-H]-			-32.9
1492	537.296	1.70438	225.238	PG(p20:0)	[M-H]-			-42.9
1592	527.228	1.8594	214.305	PG(p20:5)	[M-H]-			-25.1
1496	585.25	1.70438	231.51	PG(p20:6)	[M+CH3COO]-			6
1516	621.389	1.75797	243.031	PG(p26:0)	[M-H]-	PG(o26:1)_[M-H]-		-39.6
1499	679.394	1.70438	256.589	PG(p26:1)	[M+CH3COO]-	PG(o26:2)_[M+CH3COO]-		-36.9
1446	671.333	1.60293	255.394	PG(p26:5)	[M+CH3COO]-			-34.7
1478	647.448	1.67057	253.059	PG(p28:1)	[M-H]-			30.1
1502	703.402	1.70438	258.913	PG(p28:3)	[M+CH3COO]-			-24
1325	751.494	1.36052	274.498	PG(p36:5)	[M-H]-			3.1
2494	613.321	3.92835	236.568	PI(18:0)	[M-H]-			35.3
2401	749.374	3.6521	266.015	PI(24:4)	[M+CH3COO]-			30.2
2265	803.41	3.30823	275.379	PI(28:5)	[M+CH3COO]-			15.2
2323	869.515	3.40968	291.511	PI(32:0)	[M+CH3COO]-	PI(o38:5)_[M-H]-		-28.2
2304	893.52	3.37587	298.291	PI(34:2)	[M+CH3COO]-	PI(o40:7)_[M-H]-		-20.8
2298	885.459	3.37587	294.892	PI(34:6)	[M+CH3COO]-			-20.1
2280	923.545	3.34205	304.954	PI(36:1)	[M+CH3COO]-	PI(o38:8)_[M+CH3COO]-		-44.6
2373	861.517	3.53088	290.393	PI(36:2)	[M-H]-	PI(32:4)_[M+CH3COO]-		-37.6
2347	857.493	3.46327	288.087	PI(36:4)	[M-H]-			-29.6
2346	855.479	3.46327	285.759	PI(36:5)	[M-H]-			-27.9
2327	885.521	3.40968	293.74	PI(38:4)	[M-H]-			-32
2291	883.506	3.37587	292.596	PI(38:5)	[M-H]-			-31.5
2325	881.49	3.40968	291.449	PI(38:6)	[M-H]-			-31.7
2350	939.488	3.46327	306.004	PI(38:7)	[M+CH3COO]-			-37.9
2269	937.543	3.30823	306.013	PI(38:8)	[M+CH3COO]-	PI(42:6)_[M-H]-		37.1
2279	911.531	3.34205	300.482	PI(40:5)	[M-H]-	PI(36:7)_[M+CH3COO]-		-37.1
2278	909.517	3.34205	300.492	PI(40:6)	[M-H]-	PI(36:8)_[M+CH3COO]-		-35.5
2267	907.502	3.30823	297.077	PI(40:7)	[M-H]-			-35.2
2266	905.487	3.30823	297.087	PI(40:8)	[M-H]-			-34.7
2237	929.487	3.22083	300.395	PI(42:10)	[M-H]-			-33.5
2268	933.507	3.30823	303.777	PI(42:8)	[M-H]-			-45.8
2324	871.514	3.40968	291.501	PI(o34:6)	[M+CH3COO]-			19.6
2330	947.481	3.40968	304.84	PI(o40:10)	[M+CH3COO]-			-49.8
2247	889.501	3.25465	294.872	PI(o40:9)	[M-H]-	PI(34:4)_[M+CH3COO]-	PI(p40:8)_[M-H]-	-25.1
2234	703.389	3.22083	255.161	PI(p26:3)	[M-H]-			9.6
2192	781.394	3.09962	265.819	PI(p32:6)	[M-H]-			-45
2326	881.61	3.40968	292.606	PI(p34:0)	[M+CH3COO]-	PI(o34:1)_[M+CH3COO]-		38.6
4169	610.307	6.20017	229.957	PS(24:6)	[M-H]-			48.1
4165	810.506	6.16635	283.658	PS(38:4)	[M-H]-			-27.4
4150	834.505	6.09872	288.212	PS(40:6)	[M-H]-	PC(p42:11)_[M-H]-		-27.9
4155	832.489	6.13253	285.884	PS(40:7)	[M-H]-			-29
4140	856.485	6.01132	288.092	PS(42:9)	[M-H]-			-33.1
4141	938.478	6.01132	304.882	PS(44:12)	[M+CH3COO]-			-43.1
132	536.507	0.464167	245.158	Cer(d34:1)	[M-H]-			5.4
499	590.464	0.585367	249.746	Cer(d34:4)	[M+CH3COO]-			-25.2
405	588.473	0.551567	249.765	Cer(d34:5)	[M+CH3COO]-			16.9
158	624.548	0.464167	262.029	Cer(d36:1)	[M+CH3COO]-			-14
140	564.537	0.464167	251.283	Cer(d36:1)	[M-H]-			1.7
156	622.533	0.464167	260.804	Cer(d36:2)	[M+CH3COO]-			-12.9
138	562.519	0.464167	250.026	Cer(d36:2)	[M-H]-			-2.1
408	618.48	0.551567	255.831	Cer(d36:4)	[M+CH3COO]-			-47.3
165	652.569	0.464167	267.952	Cer(d38:1)	[M+CH3COO]-			-29
148	592.565	0.464167	258.587	Cer(d38:1)	[M-H]-			-2.4
516	646.539	0.585367	263.078	Cer(d38:4)	[M+CH3COO]-			-2.7
189	706.614	0.464167	279.605	Cer(d42:2)	[M+CH3COO]-			-28.9
164	646.607	0.464167	268.003	Cer(d42:2)	[M-H]-			-9.9
187	704.586	0.464167	278.426	Cer(d42:3)	[M+CH3COO]-			-47.1
163	644.59	0.464167	268.02	Cer(d42:3)	[M-H]-			-12.5
352	736.653	0.51775	288.833	Cer(d44:1)	[M+CH3COO]-			-39.4
744	698.547	0.672767	272.456	HexCer(d34:1)	[M-H]-			-15
748	726.576	0.672767	279.459	HexCer(d36:1)	[M-H]-			-17.5
747	724.557	0.672767	277.083	HexCer(d36:2)	[M-H]-			-21.7
754	754.601	0.672767	286.363	HexCer(d38:1)	[M-H]-			-24.9
762	782.63	0.672767	292.016	HexCer(d40:1)	[M-H]-			-26.9
766	808.643	0.672767	296.472	HexCer(d42:2)	[M-H]-			-28.8
778	862.611	0.672767	300.736	HexCer(d42:5)	[M+CH3COO]-			-34.9
4743	761.564	7.33893	286.317	SM(d34:1)	[M+CH3COO]-			-22
4734	787.577	7.28535	291.984	SM(d36:2)	[M+CH3COO]-			-25.3
4711	871.659	7.25153	308.597	SM(d42:2)	[M+CH3COO]-			-35.7
4702	869.636	7.21772	307.485	SM(d42:3)	[M+CH3COO]-			-44.5

## Sheet: Overlapping Lipids
Lipid
DG(26:3)
DG(32:1)
DG(36:5)
DG(42:4)
PC(28:0)
PC(30:0)
PC(30:1)
PC(32:0)
PC(32:1)
PC(34:1)
PC(34:2)
PC(34:3)
PC(36:2)
PC(36:4)
PC(36:5)
PC(38:4)
PC(38:5)
PC(38:6)
PC(38:7)
PC(40:6)
PC(40:7)
PC(40:8)
PC(42:6)
PC(42:7)
PC(44:12)
PC(o36:8)
PE(32:1)
PE(34:1)
PE(34:2)
PE(34:3)
PE(36:1)
PE(36:2)
PE(36:4)
PE(36:5)
PE(38:4)
PE(38:6)
PE(38:7)
PE(40:4)
PE(40:6)
PE(40:7)
PE(40:8)
PE(40:9)
PE(42:10)
PE(42:5)
PE(42:9)
PE(44:10)
PE(44:12)
PE(44:8)
PE(o32:2)
PE(o40:10)
PE(o42:10)
PE(o42:11)
PE(o42:8)
PE(p34:1)
PE(p34:2)
PE(p36:4)
PE(p38:4)
PE(p38:6)
PE(p40:6)
PE(p40:7)
PG(34:1)
PG(34:2)
PG(36:1)
PG(o26:0)
PI(36:1)
PI(36:4)
PI(38:4)
PI(38:5)
PI(40:5)
PI(40:7)
PI(40:8)
PI(42:8)
PS(40:6)
Cer(d34:1)
Cer(d36:1)
Cer(d36:2)
Cer(d36:4)
Cer(d38:1)
Cer(d38:4)
Cer(d42:2)
Cer(d42:3)
HexCer(d34:1)
HexCer(d36:1)
HexCer(d36:2)
HexCer(d38:1)
HexCer(d40:1)
HexCer(d42:2)
SM(d34:1)
SM(d36:2)
SM(d42:2)
SM(d42:3)
