# Supplementary material for: Temporal changes in the brain lipidome during neurodevelopment of Smith–Lemli–Opitz syndrome mice
Source: Royal Society of Chemistry journal article supplement (doi:10.1039/d2an00137c), 2022-01-01
Supplement: d2an00137c5.xlsx [file d2an00137c5.xlsx]

## Sheet: Sheet1
E12.5
Subclass	Lipid	Adduct	Compound	logCPM	logFC	Adj.PValue	Ave.WT Abundance	Ave.KO Abundance
MG	(20:3)	[M+NH4]+	MG(20:3)[M+NH4]+	13.16	2.056	6.909e-12	12.6145	14.6708
DG	(20:1)	[M+H-H2O]+	DG(20:1)[M+H-H2O]+	12.92	0.9003	0.0001333	12.6933	13.5937
MG	(20:2)	[M+H-H2O]+	MG(20:2)[M+H-H2O]+	13.28	0.9244	0.0005979	12.936	13.8605
MG	(20:3)	[M+H-H2O]+	MG(20:3)[M+H-H2O]+	11.57	0.9783	0.001868	11.0479	12.0263
E14.5
Subclass	Lipid	Adduct	Compound	logCPM	logFC	Adj.PValue	Ave.WT Abundance	Ave.KO Abundance
MG	(20:3)	[M+NH4]+	MG(20:3)[M+NH4]+	13.16	2.102	3.942e-12	11.9716	14.0732
DG	(20:1)	[M+H-H2O]+	DG(20:1)[M+H-H2O]+	12.92	1.133	1.868e-06	12.1427	13.2756
MG	(20:2)	[M+H-H2O]+	MG(20:2)[M+H-H2O]+	13.28	1.274	2.13e-06	12.4137	13.688
MG	(20:3)	[M+H-H2O]+	MG(20:3)[M+H-H2O]+	11.57	1.249	4.151e-05	10.6024	11.8514
MG	(24:6)	[M+H]+	MG(24:6)[M+H]+	11.21	1.041	0.001047	10.4172	11.4583
PE(O/P)	(p34:1)	[M-H]-	PE(O/P)(p34:1)[M-H]-	16.08	-0.4817	0.002512	16.4646	15.9829
PE(O/P)	(p32:1)	[M-H]-	PE(O/P)(p32:1)[M-H]-	12.96	-0.561	0.0228	13.462	12.901
E16.5
Subclass	Lipid	Adduct	Compound	logCPM	logFC	Adj.PValue	Ave.WT Abundance	Ave.KO Abundance
MG	(20:3)	[M+NH4]+	MG(20:3)[M+NH4]+	13.16	1.955	2.521e-11	12.2041	14.1586
DG	(20:1)	[M+H-H2O]+	DG(20:1)[M+H-H2O]+	12.92	1.125	2.165e-06	12.4397	13.5643
MG	(20:2)	[M+H-H2O]+	MG(20:2)[M+H-H2O]+	13.28	1.16	1.278e-05	12.8147	13.9751
MG	(20:3)	[M+H-H2O]+	MG(20:3)[M+H-H2O]+	11.57	1.281	2.652e-05	11.0534	12.3347
MG	(24:6)	[M+H]+	MG(24:6)[M+H]+	11.21	0.9759	0.002549	10.8662	11.8421
PE	(44:10)	[M+Na]+	PE(44:10)[M+Na]+	11.53	0.3547	0.03832	11.4891	11.8438
PND0
Subclass	Lipid	Adduct	Compound	logCPM	logFC	Adj.PValue	Ave.WT Abundance	Ave.KO Abundance
MG	(20:3)	[M+NH4]+	MG(20:3)[M+NH4]+	13.16	2.153	2.12e-12	11.7284	13.881
MG	(20:2)	[M+H-H2O]+	MG(20:2)[M+H-H2O]+	13.28	2.127	2.912e-11	12.2241	14.3516
DG	(20:1)	[M+H-H2O]+	DG(20:1)[M+H-H2O]+	12.92	1.8	2.925e-11	11.9393	13.7389
MG	(20:3)	[M+H-H2O]+	MG(20:3)[M+H-H2O]+	11.57	2.425	2.925e-11	10.5907	13.0152
MG	(24:6)	[M+H]+	MG(24:6)[M+H]+	11.21	2.055	2.889e-09	10.1844	12.2397
MG	(24:7)	[M+H]+	MG(24:7)[M+H]+	10.38	1.649	1.437e-06	9.55133	11.2003
MG	(20:4)	[M+H-H2O]+	MG(20:4)[M+H-H2O]+	9.394	1.784	2.109e-06	8.55963	10.3435
MG	(20:2)	[M+H]+	MG(20:2)[M+H]+	13.54	1.132	2.904e-06	12.8433	13.9751
MG	(20:0)	[M+H-H2O]+	MG(20:0)[M+H-H2O]+	9.684	0.8793	0.001207	8.99184	9.87119
SM	(d36:2)	[M+H]+	SM(d36:2)[M+H]+	8.98	-0.9068	0.002063	10.7571	9.85036
TG	(52:2)	[M+NH4]+	TG(52:2)[M+NH4]+	13.12	-0.5846	0.004307	13.5427	12.9581
HexCer	(d36:2)	[M+H-H2O]+	HexCer(d36:2)[M+H-H2O]+	9.419	-0.57	0.005729	9.94662	9.37662
PE	(40:8)	[M+K]+	PE(40:8)[M+K]+	9.572	0.403	0.01103	9.24826	9.65125
TG	(54:3)	[M+NH4]+	TG(54:3)[M+NH4]+	11.93	-0.4944	0.01718	12.11	11.6156
Cer	(d34:1)	[M+H-H2O]+	Cer(d34:1)[M+H-H2O]+	13.22	-0.4159	0.03445	12.8157	12.3999
TG	(50:1)	[M+NH4]+	TG(50:1)[M+NH4]+	12.87	-0.4882	0.03445	13.2379	12.7497
LPE	(22:4)	[M+H]+	LPE(22:4)[M+H]+	8.789	0.4605	0.04951	8.44094	8.90141
FA	(20:2)	[M-H]-	FA(20:2)[M-H]-	10.75	0.9281	0.0009465	10.352	11.2801
FA	(20:3)	[M-H]-	FA(20:3)[M-H]-	11.37	1.193	0.002603	11.0646	12.2571
FA	(22:6)	[M-H]-	FA(22:6)[M-H]-	12.46	1.436	0.006671	12.3891	13.8249
PE(O/P)	(p34:1)	[M-H]-	PE(O/P)(p34:1)[M-H]-	16.08	-0.385	0.0127	15.6569	15.272
LPC	(16:1)	[M+CH3COO]-	LPC(16:1)[M+CH3COO]-	9.506	1	0.01458	9.33653	10.3367
PE	(30:4)	[M+CH3COO]-	PE(30:4)[M+CH3COO]-	8.653	-1.441	0.01458	9.16241	7.72103
FA	(22:4)	[M-H]-	FA(22:4)[M-H]-	11.03	1.376	0.01521	10.4245	11.8004
PE(O/P)	(p32:1)	[M-H]-	PE(O/P)(p32:1)[M-H]-	12.96	-0.5168	0.01521	12.7283	12.2116
FA	(20:1)	[M-H]-	FA(20:1)[M-H]-	9.835	0.7893	0.01758	9.84617	10.6355
LPE	(18:0)	[M-H]-	LPE(18:0)[M-H]-	12.1	0.8549	0.01842	12.3433	13.1982
LPE(O/P)	(p18:0)	[M-H]-	LPE(O/P)(p18:0)[M-H]-	9.156	0.7428	0.03236	9.17441	9.91718
PE	(36:2)	[M-H]-	PE(36:2)[M-H]-	16.53	-0.2916	0.04246	16.1607	15.8691
