# Supplementary material for: Temporal changes in the brain lipidome during neurodevelopment of Smith–Lemli–Opitz syndrome mice
Source: Royal Society of Chemistry journal article supplement (doi:10.1039/d2an00137c), 2022-01-01
Supplement: d2an00137c6.xlsx [file d2an00137c6.xlsx]

## Sheet: LIPEA Results
Pathway name	Pathway lipids	Converted lipids (number)	Converted lipids (percentage)	Converted lipids (list)	p-value	Benjamini correction	Bonferroni correction
Fat digestion and absorption	8	4	21.0526	C02112, C00422, C01885, C00165	7.44367e-05	0.00279272	0.00550832
Sphingolipid signaling pathway	9	4	21.0526	C00195, C00165, C12126, C00550	0.00013094	0.00279272	0.00968953
Glycerophospholipid metabolism	26	6	31.5789	C00350, C04438, C04230, C04233, C00641, C05973	0.00013095	0.00279272	0.00969032
Insulin resistance	4	3	15.7895	C00195, C00165, C00422	0.000150958	0.00279272	0.0111709
Regulation of lipolysis in adipocytes	6	3	15.7895	C00165, C00422, C01885	0.000720999	0.0106708	0.0533539
AGE-RAGE signaling pathway in diabetic complications	2	2	10.5263	C00195, C00165	0.00120611	0.0148754	0.0892522
Neurotrophin signaling pathway	3	2	10.5263	C00195, C00165	0.00354111	0.0262042	0.262042
Long-term depression	3	2	10.5263	C00165, C00641	0.00354111	0.0262042	0.262042
Adipocytokine signaling pathway	3	2	10.5263	C00195, C00165	0.00354111	0.0262042	0.262042
Kaposi's sarcoma-associated herpesvirus infection	3	2	10.5263	C00165, C00350	0.00354111	0.0262042	0.262042
Ferroptosis	11	3	15.7895	C21480, C21481, C21484	0.00530491	0.0356875	0.392563
Necroptosis	4	2	10.5263	C00195, C00550	0.00693125	0.0427427	0.512913
Choline metabolism in cancer	5	2	10.5263	C00165, C04230	0.0113062	0.0643583	0.836658
Glycerolipid metabolism	15	3	15.7895	C00422, C00641, C01885	0.0133494	0.0658572	0.987858
Vitamin digestion and absorption	15	3	15.7895	C02112, C00422, C01885	0.0133494	0.0658572	0.987858
Retrograde endocannabinoid signaling	8	2	10.5263	C00165, C00350	0.0296839	0.0799363	1
Sphingolipid metabolism	21	3	15.7895	C00195, C00550, C12126	0.0340219	0.0799363	1
MAPK signaling pathway	1	1	5.26316	C00165	0.0356473	0.0799363	1
Rap1 signaling pathway	1	1	5.26316	C00165	0.0356473	0.0799363	1
NF-kappa B signaling pathway	1	1	5.26316	C00165	0.0356473	0.0799363	1
HIF-1 signaling pathway	1	1	5.26316	C00165	0.0356473	0.0799363	1
Adrenergic signaling in cardiomyocytes	1	1	5.26316	C00165	0.0356473	0.0799363	1
Th1 and Th2 cell differentiation	1	1	5.26316	C00165	0.0356473	0.0799363	1
Long-term potentiation	1	1	5.26316	C00165	0.0356473	0.0799363	1
Glutamatergic synapse	1	1	5.26316	C00165	0.0356473	0.0799363	1
Circadian entrainment	1	1	5.26316	C00165	0.0356473	0.0799363	1
Dopaminergic synapse	1	1	5.26316	C00165	0.0356473	0.0799363	1
Melanogenesis	1	1	5.26316	C00165	0.0356473	0.0799363	1
Insulin secretion	1	1	5.26316	C00165	0.0356473	0.0799363	1
Thyroid hormone synthesis	1	1	5.26316	C00165	0.0356473	0.0799363	1
Gastric acid secretion	1	1	5.26316	C00165	0.0356473	0.0799363	1
Salivary secretion	1	1	5.26316	C00165	0.0356473	0.0799363	1
Pancreatic secretion	1	1	5.26316	C00165	0.0356473	0.0799363	1
